# Supplementary material
Source: MDPI journal article supplement (https://www.mdpi.com/2075-163X/13/9/1122)
Supplement: s1 [file s1]

Archive with 3 entries (3 files):
- !GrokenManuscriptDraftSuppl_R1_230820_Clean.pdf
- GrokenSupp3ThermoCalcData.xlsx
- ThermoddemV1.10_Groken_june2023.txt
