# Supplementary material
Source: MDPI journal article supplement (https://www.mdpi.com/2075-163X/13/9/1122)
Supplement: s1 [file s1 › GrokenSupp3ThermoCalcData.xlsx]

## Sheet: Explanation
	Calculation of free energies and Ks values for Mn-Fe-P phases, following the method of Drouet (2015, 2019).
	Supplement to the paper Treiman A.H. et al. (2023) Manganese-Iron Phosphate Nodules at the Groken site, Gale Crater, Mars.
		To be published in Minerals journal.
	In the following sheets, the free energies of Mn-Fe-P mineral are
	calculated according to the ThermAP method of Drouet (2014, 2019),
	using the correlation parameters (gi, hi, si) of Drouet et al. (2022).
	The values are based on the thermochemical values in the comp-
	ilation of Vieillard and Tardy (1984). Comparisons are provided,
	where possible, with G values from Nriagu and Dell (1974). These
	calculations use the phosphate anion [(PO4)3-].
	These Ksp are relative to the
	ion H2(PO4)-, for consistency with the Thermodem….tdat dataset based on
	Vieillard and Tardy (1984) for use in Geochemist's Workbench(C).
	Tablulated values from Drouet et al. (2022) are for 25°C. Values for
	0 and 50°C are extrapolated assuming that S for a phase is constant
	over this temperature interval. Although formally incorrect, the
	extrapolation is small and should be within the uncertainties of the
	G estimates based on Drouet et al. (2022).
	Drouet, C. (2015) A comprehensive guide to experimental and predicted thermodynamic properties of phosphate apatite minerals in view of applicative purposes. Journal of Chemical Thermodynamics, 81, 143-159.
	Drouet, C. (2019) Applied predictive thermodynamics (ThermAP). Part 2. Apatites containing Ni2+, Co2+, Mn2+, or Fe2+ ions. The Journal of Chemical Thermodynamics, 136, 182-189.
	Drouet, C., Loche, M., Fabre, S., and Meslin, P.-Y. (2022) On the occurrence of jahnsite/whiteite phases on Mars: A thermodynamic study. American Mineralogist, 107, 1807-1817.
	Nriagu, J.O., and Dell, C. (1974) Diagenetic formation of iron phosphates in recent lake sediments. American Mineralogist: Journal of Earth and Planetary Materials, 59(9-10), 934-946.
	Vieillard, P., and Tardy, Y. (1984) Thermochemical properties of phosphates. Phosphate Minerals, p. 171-198. Springer.

## Sheet: Laueite
Laueite	Mn(Fe3+)2(PO4)2(OH)2..8H2O
	From Table 2 of Drouet et al. (2022)						Veillard (1984), Tables 1, 2, 3, 4
	Contributing Ions						DG0 (298)	DH0 (298)	S0 (298)	Cp (298)	Cp 'b' param
	298K, 1 bar	gi kJ/mol	hi kJ/mol	si J/mol.K			KJ/mol	KJ/mol	J/mol-K	J/mol-K
	Cations
	Ca2+	-747.1	-776.4	47.2		Ca2+	-553.54	-542.83	-95	0.8	2.8
	Mg2+	-638	-669.3	30.2		Mg2+	-454.8	-446.85	-180	38.5	129.1
	Mn2+	-443	-462.1	70.5		Mn2+	-228	-220.75	-115	50
	Fe2+	-279	-290.8	90.2		Fe2+	-78.87	-89.1	-179	50
	Zn2+	-350.7	-367.1	70		Zn2+	-147.03	-153.9	-153.8	50
	Fe3+	-353.1	-391.5	52		Fe3+	-4.6	-48.53	-378.7	24.7	82.5
	Al3+	-796.2	-845.9	15.3		Al3+	-485.34	-531.37	-384.5	38.1	128
	Na+	-334.6	-353.6	39.1		Na+	-261.9	240.1	38.1	46.44	155.8
	K+	-375.5	-398	40.6		K+	-283.26	-252.4	81.6	21.8	72.8
	H+	-110.4	-137.7	25.1		H+	0	0	-20.9	0	0
	Anions
	(PO4)3-	-821.7	-897.3	44		(PO4)3-	-1018.8	-1277.38	-159	-334.7	-1121.3
						H2(PO4)-	-1130.4	-1296.3	111.3	-43.9	-147.3
	OH-	-115.8	-140.6	33.4		OH-	-157.29	-230	10.14	-148.5	-498
	F-	-278.1	-287.1	19.9		F-	-278.82	-332.63	7.11	-105	-352.3
	Hydration
	H2O	-237.1	-295.4	37.6		H2O	-237.18	-285.83	69.9	75.32
		Taking dGi/dT=-Si, we can extrapolate Drouet.					G(T) - G(T0) = [-S(T0)*(T-T0)] + [Cp*(T-T0)] - [T*(Cp(0)*ln(T/T0)]					from Vieillard & Tardy (1984) eqn page 174
							assuming that Cp is constant over the limited T range.
	Laueite 25°C	Mn(Fe3+)2(PO4)2(OH)2..8H2O						Ksp(298) for Drouet laueite, all data but Laueite from Vieillard & Tardy above.
		Dg kJ/mol	DH kJ/mol	S0 J/mol.K					Mn(Fe3+)2(PO4)2(OH)2..8H2O == - 6 H+ + Mn2+ + 2 Fe3+ + 2 H2(PO4)- + 10 H2O
	Drouet 22	-4921	-5684.1	630.1					Ksp =( [Mn2+] * [Fe3+]^2 * [H2PO43-]^2 * [H2O]^10) / [H+]^6
	Nriagu 74	-4884.8			from N&D table 2				DeltaG(rxn)= DeltaG0 - (R*T*2.303*log [Ksp]) = DeltaG0 - (8.31446 * 298.15 *2.303 * log {Ksp})
									DeltaG0 =	51.2	kJ	DeltaS rxn =	-455.5
									log Ksp(298)	-8.96824
	Laueite 50°C	Mn(Fe3+)2(PO4)2(OH)2..8H2O						Ksp(323) for Drouet laueite.
		Dg kJ/mol	DH kJ/mol	S0 J/mol.K					Mn(Fe3+)2(PO4)2(OH)2..8H2O == - 6 H+ + Mn2+ + 2 Fe3+ + 2 H2(PO4)- + 10 H2O
	Drouet 22	-4936.75							Ksp =( [Mn2+] * [Fe3+]^2 * [H2PO43-]^2 * [H2O]^10) / [H+]^6
									DeltaG(rxn)= 0 = DeltaG0 - (R*T*2.303*log [Ksp]) = DeltaG0 - (8.31446 * 323.15 *2.303 * log {Ksp})
									DeltaG0 =	78.34	kJ
									log Ksp(323)	-12.6605
	Laueite 0°C	Mn(Fe3+)2(PO4)2(OH)2..8H2O						Ksp(273) for Drouet laueite.
		Dg kJ/mol	DH kJ/mol	S0 J/mol.K					Mn(Fe3+)2(PO4)2(OH)2..8H2O == - 6 H+ + Mn2+ + 2 Fe3+ + 2 H2(PO4)- + 10 H2O
	Drouet 22	-4905.25							Ksp =( [Mn2+] * [Fe3+]^2 * [H2PO43-]^2 * [H2O]^10) / [H+]^6
									DeltaG(rxn)= 0 = DeltaG0 - (R*T*2.303*log [Ksp]) = DeltaG0 - (8.31446 * 273.15 *2.303 * log {Ksp})
									DeltaG0 =	24.06	kJ
									log Ksp(273)	-4.60009

## Sheet: Strunzite
Strunzite	Mn(Fe3+)2(PO4)2(OH)2..6H2O
	From Table 2 of Drouet et al. (2022)						Veillard (1984), Tables 1, 2, 3, 4
	Contributing Ions						DG0 (298)	DH0 (298)	S0 (298)	Cp (298)	Cp 'b' param
	298K, 1 bar	gi kJ/mol	hi kJ/mol	si J/mol.K			KJ/mol	KJ/mol	J/mol-K	J/mol-K
	Cations
	Ca2+	-747.1	-776.4	47.2		Ca2+	-553.54	-542.83	-95	0.8	2.8
	Mg2+	-638	-669.3	30.2		Mg2+	-454.8	-446.85	-180	38.5	129.1
	Mn2+	-443	-462.1	70.5		Mn2+	-228	-220.75	-115	50
	Fe2+	-279	-290.8	90.2		Fe2+	-78.87	-89.1	-179	50
	Zn2+	-350.7	-367.1	70		Zn2+	-147.03	-153.9	-153.8	50
	Fe3+	-353.1	-391.5	52		Fe3+	-4.6	-48.53	-378.7	24.7	82.5
	Al3+	-796.2	-845.9	15.3		Al3+	-485.34	-531.37	-384.5	38.1	128
	Na+	-334.6	-353.6	39.1		Na+	-261.9	240.1	38.1	46.44	155.8
	K+	-375.5	-398	40.6		K+	-283.26	-252.4	81.6	21.8	72.8
	H+	-110.4	-137.7	25.1		H+	0	0	-20.9	0	0
	Anions					Anions
	(PO4)3-	-821.7	-897.3	44		(PO4)3-	-1018.8	-1277.38	-159	-334.7	-1121.3
						H2(PO4)-	-1130.4	-1296.3	111.3	-43.9	-147.3
	OH-	-115.8	-140.6	33.4		OH-	-157.29	-230	10.14	-148.5	-498
	F-	-278.1	-287.1	19.9		F-	-278.82	-332.63	7.11	-105	-352.3
	Hydration					Hydration
	H2O	-237.1	-295.4	37.6		H2O	-237.18	-285.83	69.9	75.32
		Taking dGi/dT=-Si, we can extrapolate Drouet.					G(T) - G(T0) = [-S(T0)*(T-T0)] + [Cp*(T-T0)] - [T*(Cp(0)*ln(T/T0)]					from Vieillard & Tardy (1984) eqn page 174
							assuming that Cp is constant over the limited T range.
	Strunzite 25°C	Mn(Fe3+)2(PO4)2(OH)2..6H2O						Ksp(298) for Drouet Strunzite, all data but strunzite from Vieillard & Tardy above.
		Dg kJ/mol	DH kJ/mol	S0 J/mol.K					Mn(Fe3+)2(PO4)2(OH)2..6H2O == - 6 H+ + Mn2+ + 2 Fe3+ + 2 H2(PO4)- + 8 H2O
	Drouet 22	-4446.8	-5093.3	554.9					Ksp =( [Mn2+] * [Fe3+]^2 * [H2PO43-]^2 * [H2O]^8) / [H+]^6
									DeltaG(rxn)= DeltaG0 - (R*T*2.303*log [Ksp]) = DeltaG0 - (8.31446 * 298.15 *2.303 * log {Ksp})
									DeltaG0 =	51.36	kJ	DeltaS rxn =	-520.1
									log Ksp(298)	-8.99626
	Strunzite 50°C	Mn(Fe3+)2(PO4)2(OH)2..6H2O						Ksp(323) for Drouet Strunzite.
		Dg kJ/mol	DH kJ/mol	S0 J/mol.K					Mn(Fe3+)2(PO4)2(OH)2..6H2O == - 6 H+ + Mn2+ + 2 Fe3+ + 2 H2(PO4)- + 10 H2O
	Drouet 22	-4460.67							Ksp =( [Mn2+] * [Fe3+]^2 * [H2PO43-]^2 * [H2O]^8) / [H+]^6
									DeltaG(rxn)= 0 = DeltaG0 - (R*T*2.303*log [Ksp]) = DeltaG0 - (8.31446 * 323.15 *2.303 * log {Ksp})
									DeltaG0 =	78.235	kJ
									log Ksp(323)	-12.6435
	Strunzite 0°C	Mn(Fe3+)2(PO4)2(OH)2..6H2O						Ksp(273) for Drouet Strunzite.
		Dg kJ/mol	DH kJ/mol	S0 J/mol.K					Mn(Fe3+)2(PO4)2(OH)2..6H2O == - 6 H+ + Mn2+ + 2 Fe3+ + 2 H2(PO4)- + 10 H2O
	Drouet 22	-4432.93							Ksp =( [Mn2+] * [Fe3+]^2 * [H2PO43-]^2 * [H2O]^8) / [H+]^6
									DeltaG(rxn)= 0 = DeltaG0 - (R*T*2.303*log [Ksp]) = DeltaG0 - (8.31446 * 273.15 *2.303 * log {Ksp})
									DeltaG0 =	24.485	kJ
									log Ksp(273)	-4.68135

## Sheet: Reddingite
Reddingite	(Mn2+)3(PO4)2.3H2O
	From Table 2 of Drouet et al. (2022)						Veillard (1984), Tables 1, 2, 3, 4
	Contributing Ions						DG0 (298)	DH0 (298)	S0 (298)	Cp (298)	Cp 'b' param
	298K, 1 bar	gi kJ/mol	hi kJ/mol	si J/mol.K			KJ/mol	KJ/mol	J/mol-K	J/mol-K
	Cations					Cations
	Ca2+	-747.1	-776.4	47.2		Ca2+	-553.54	-542.83	-95	0.8	2.8
	Mg2+	-638	-669.3	30.2		Mg2+	-454.8	-446.85	-180	38.5	129.1
	Mn2+	-443	-462.1	70.5		Mn2+	-228	-220.75	-115	50
	Fe2+	-279	-290.8	90.2		Fe2+	-78.87	-89.1	-179	50
	Zn2+	-350.7	-367.1	70		Zn2+	-147.03	-153.9	-153.8	50
	Fe3+	-353.1	-391.5	52		Fe3+	-4.6	-48.53	-378.7	24.7	82.5
	Al3+	-796.2	-845.9	15.3		Al3+	-485.34	-531.37	-384.5	38.1	128
	Na+	-334.6	-353.6	39.1		Na+	-261.9	240.1	38.1	46.44	155.8
	K+	-375.5	-398	40.6		K+	-283.26	-252.4	81.6	21.8	72.8
	H+	-110.4	-137.7	25.1		H+	0	0	-20.9	0	0
	Anions					Anions
	(PO4)3-	-821.7	-897.3	44		(PO4)3-	-1018.8	-1277.38	-159	-334.7	-1121.3
						H2(PO4)-	-1130.4	-1296.3	111.3	-43.9	-147.3
	OH-	-115.8	-140.6	33.4		OH-	-157.29	-230	10.14	-148.5	-498
	F-	-278.1	-287.1	19.9		F-	-278.82	-332.63	7.11	-105	-352.3
	Hydration					Hydration
	H2O	-237.1	-295.4	37.6		H2O	-237.18	-285.83	69.9	75.32
		Taking dGi/dT=-Si, we can extrapolate Drouet.					G(T) - G(T0) = [-S(T0)*(T-T0)] + [Cp*(T-T0)] - [T*(Cp(0)*ln(T/T0)]					from Vieillard & Tardy (1984) eqn page 174
								assuming that Cp is constant over the limited T range.
	Reddingite 25°C	(Mn2+)3(PO4)2.3H2O						Ksp(298) for Drouet reddingite, all data but reddingite from Vieillard & Tardy above.
		Dg kJ/mol	DH kJ/mol	S0 J/mol.K					(Mn2+)3(PO4)2..3H2O == - 4 H+ + 3Mn++ + 2 H2(PO4)- + 3 H2O
	Drouet 22	-3683.7	-4067.1	412.3					Ksp =( [Mn2+]^3 * [H2PO43-]^2 * [H2O]^3 ) / [H+]^4
	Nriagu 74	-3643.8	Ksp	-2.2	Table 1, calculated there				DeltaG(rxn)= DeltaG0 - (R*T*2.303*log [Ksp]) = DeltaG0 - (8.31446 * 298.15 *2.303 * log {Ksp})											logK= +19.55
									DeltaG0 =	27.36	kj	DeltaS rxn =	-124.14
									log Ksp =	-4.7924
	Reddingite 50°C	(Mn2+)3(PO4)2.3H2O						Ksp(323) for Drouet reddingite.
		Dg kJ/mol	DH kJ/mol	S0 J/mol.K					(Mn2+)3(PO4)2..3H2O == - 4 H+ + 3Mn++ + 2 H2(PO4)- + 3 H2O
	Drouet 22	-3694.01							Ksp =( [Mn2+]^3 * [H2PO43-]^2 * [H2O]^3 ) / [H+]^4
									DeltaG(rxn)= 0 = DeltaG0 - (R*T*2.303*log [Ksp]) = DeltaG0 - (8.31446 * 323.15 *2.303 * log {Ksp})
									DeltaG0 =	40.771	kJ
									log Ksp(323)	-6.589
	Reddingite 0°C	(Mn2+)3(PO4)2.3H2O						Ksp(273) for Drouet reddingite.
		Dg kJ/mol	DH kJ/mol	S0 J/mol.K					(Mn2+)3(PO4)2..3H2O == - 4 H+ + 3Mn++ + 2 H2(PO4)- + 3 H2O
	Drouet 22	-3673.39							Ksp =( [Mn2+]^3 * [H2PO43-]^2 * [H2O]^3 ) / [H+]^4
									DeltaG(rxn)= 0 = DeltaG0 - (R*T*2.303*log [Ksp]) = DeltaG0 - (8.31446 * 273.15 *2.303 * log {Ksp})
									DeltaG0 =	13.949	kJ
									log Ksp(273)	-2.66694

## Sheet: Vivianite-Mn
Mn-vivianite	(Mn2+)3(PO4)2.8H2O
	From Table 2 of Drouet et al. (2022)						Veillard (1984), Tables 1, 2, 3, 4
	Contributing Ions						DG0 (298)	DH0 (298)	S0 (298)	Cp (298)	Cp 'b' param
	298K, 1 bar	gi kJ/mol	hi kJ/mol	si J/mol.K			KJ/mol	KJ/mol	J/mol-K	J/mol-K
	Cations					Cations
	Ca2+	-747.1	-776.4	47.2		Ca2+	-553.54	-542.83	-95	0.8	2.8
	Mg2+	-638	-669.3	30.2		Mg2+	-454.8	-446.85	-180	38.5	129.1
	Mn2+	-443	-462.1	70.5		Mn2+	-228	-220.75	-115	50
	Fe2+	-279	-290.8	90.2		Fe2+	-78.87	-89.1	-179	50
	Zn2+	-350.7	-367.1	70		Zn2+	-147.03	-153.9	-153.8	50
	Fe3+	-353.1	-391.5	52		Fe3+	-4.6	-48.53	-378.7	24.7	82.5
	Al3+	-796.2	-845.9	15.3		Al3+	-485.34	-531.37	-384.5	38.1	128
	Na+	-334.6	-353.6	39.1		Na+	-261.9	240.1	38.1	46.44	155.8
	K+	-375.5	-398	40.6		K+	-283.26	-252.4	81.6	21.8	72.8
	H+	-110.4	-137.7	25.1		H+	0	0	-20.9	0	0
	Anions					Anions
	(PO4)3-	-821.7	-897.3	44		(PO4)3-	-1018.8	-1277.38	-159	-334.7	-1121.3
						H2(PO4)-	-1130.4	-1296.3	111.3	-43.9	-147.3
	OH-	-115.8	-140.6	33.4		OH-	-157.29	-230	10.14	-148.5	-498
	F-	-278.1	-287.1	19.9		F-	-278.82	-332.63	7.11	-105	-352.3
	Hydration					Hydration
	H2O	-237.1	-295.4	37.6		H2O	-237.18	-285.83	69.9	75.32
		Taking dGi/dT=-Si, we can extrapolate Drouet.					G(T) - G(T0) = [-S(T0)*(T-T0)] + [Cp*(T-T0)] - [T*(Cp(0)*ln(T/T0)]					from Vieillard & Tardy (1984) eqn page 174
							assuming that Cp is constant over the limited T range.
	Mn-vivianite 25°C	(Mn2+)3(PO4)2.8H2O						Ksp(298) for Drouet Mn-vivianite, all data but Mn-Vivianite from Vieillard & Tardy above.
		Dg kJ/mol	DH kJ/mol	S0 J/mol.K					(Mn2+)3(PO4)2..8H2O == - 4 H+ + 3Mn++ + 2 H2(PO4)- + 8 H2O
	Drouet 22	-4869.2	-5544.1	600.3					Ksp =( [Mn2+]^3 * [H2PO43-]^2 * [H2O]^8 ) / [H+]^4
	Nriagu 74								DeltaG(rxn)= DeltaG0 - (R*T*2.303*log [Ksp]) = DeltaG0 - (8.31446 * 298.15 *2.303 * log {Ksp})											logK= +19.55
									DeltaG0 =	26.96	kj	DeltaS rxn =	64.46
									log Ksp =	-4.72234
	Mn-vivianite 50°C	(Mn2+)3(PO4)2.8H2O						Ksp(323) for Drouet Mn-vivianite.
		Dg kJ/mol	DH kJ/mol	S0 J/mol.K					(Mn2+)3(PO4)2..8H2O == - 4 H+ + 3Mn++ + 2 H2(PO4)- + 3 H2O
	Drouet 22	-4884.21							Ksp =( [Mn2+]^3 * [H2PO43-]^2 * [H2O]^8 ) / [H+]^4
									DeltaG(rxn)= 0 = DeltaG0 - (R*T*2.303*log [Ksp]) = DeltaG0 - (8.31446 * 323.15 *2.303 * log {Ksp})
									DeltaG0 =	40.356	kJ
									log Ksp(323)	-6.52193
	Mn-vivianite 0°C	(Mn2+)3(PO4)2.8H2O						Ksp(273) for Drouet Mn-vivianite.
		Dg kJ/mol	DH kJ/mol	S0 J/mol.K					(Mn2+)3(PO4)2..8H2O == - 4 H+ + 3Mn++ + 2 H2(PO4)- + 3 H2O
	Drouet 22	-4854.19							Ksp =( [Mn2+]^3 * [H2PO43-]^2 * [H2O]^8 ) / [H+]^4
									DeltaG(rxn)= 0 = DeltaG0 - (R*T*2.303*log [Ksp]) = DeltaG0 - (8.31446 * 273.15 *2.303 * log {Ksp})
									DeltaG0 =	13.564	kJ
									log Ksp(273)	-2.59333

## Sheet: Rockbridgeite
Rockbridgeite		(Fe2+)(Fe3+)4(PO4)3(OH)5
	From Table 2 of Drouet et al. (2022)						Veillard (1984), Tables 1, 2, 3, 4
	Contributing Ions						DG0 (298)	DH0 (298)	S0 (298)	Cp (298)	Cp 'b' param
	298K, 1 bar	gi kJ/mol	hi kJ/mol	si J/mol.K			KJ/mol	KJ/mol	J/mol-K	J/mol-K
	Cations					Cations
	Ca2+	-747.1	-776.4	47.2		Ca2+	-553.54	-542.83	-95	0.8	2.8
	Mg2+	-638	-669.3	30.2		Mg2+	-454.8	-446.85	-180	38.5	129.1
	Mn2+	-443	-462.1	70.5		Mn2+	-228	-220.75	-115	50
	Fe2+	-279	-290.8	90.2		Fe2+	-78.87	-89.1	-179	50
	Zn2+	-350.7	-367.1	70		Zn2+	-147.03	-153.9	-153.8	50
	Fe3+	-353.1	-391.5	52		Fe3+	-4.6	-48.53	-378.7	24.7	82.5
	Al3+	-796.2	-845.9	15.3		Al3+	-485.34	-531.37	-384.5	38.1	128
	Na+	-334.6	-353.6	39.1		Na+	-261.9	240.1	38.1	46.44	155.8
	K+	-375.5	-398	40.6		K+	-283.26	-252.4	81.6	21.8	72.8
	H+	-110.4	-137.7	25.1		H+	0	0	-20.9	0	0
	Anions					Anions
	(PO4)3-	-821.7	-897.3	44		(PO4)3-	-1018.8	-1277.38	-159	-334.7	-1121.3
						H2(PO4)-	-1130.4	-1296.3	111.3	-43.9	-147.3
	OH-	-115.8	-140.6	33.4		OH-	-157.29	-230	10.14	-148.5	-498
	F-	-278.1	-287.1	19.9		F-	-278.82	-332.63	7.11	-105	-352.3
	Hydration					Hydration
	H2O	-237.1	-295.4	37.6		H2O	-237.18	-285.83	69.9	75.32
	Taking dDG/dT=-DS, we can extrapolate Drouet.					G(T) - G(T0) = [-S(T0)*(T-T0)] + [Cp*(T-T0)] - [T*(Cp(0)*ln(T/T0)]					from Vieillard & Tardy (1984) eqn page 174
							assuming that Cp is constant over the limited T range.
	Rockbridgeite 25°C	(Fe2+)(Fe3+)4(PO4)3(OH)5					Ksp(298) for Drouet Rockbridgeite, all data but Rockbridgeite from Vieillard & Tardy above.
		Dg kJ/mol	DH kJ/mol	S0 J/mol.K				Fe2+(Fe3+)4(PO4)3(OH)5 == - 11 H+ + Fe++ + 4 Fe+++ + 3 H2(PO4)- + 5 H2O
	Drouet 22	-4735.5	-5251.7	597.2				Ksp =( [Fe2+] * [Fe3+]^4 * [H2PO43-]^3 * [H2O]^5) / [H+]^11
	Nriagu 74	-4735.45			from N&D table 2			DeltaG(rxn)= DeltaG0 - (R*T*2.303*log [Ksp]) = DeltaG0 - (8.31446 * 298.15 *2.303 * log {Ksp})
								DeltaG0 =	61.13	kJ	DeltaS rxn =	-1377.7
								log Ksp(298)	-10.7076
	Rockbridgeite 50°C	(Fe2+)(Fe3+)4(PO4)3(OH)5					Ksp(323) for Drouet Rockbridgeite.
		Dg kJ/mol	DH kJ/mol	S0 J/mol.K				Fe2+(Fe3+)4(PO4)3(OH)5 == - 11 H+ + Fe++ + 4 Fe+++ + 3 H2(PO4)- + 5 H2O
	Drouet 22	-4750.43						Ksp =( [Mn2+] * [Fe3+]^2 * [H2PO43-]^2 * [H2O]^10) / [H+]^6
								DeltaG(rxn)= 0 = DeltaG0 - (R*T*2.303*log [Ksp]) = DeltaG0 - (8.31446 * 323.15 *2.303 * log {Ksp})
								DeltaG0 =	110.503	kJ
								log Ksp(323)	-17.8583
	Rockbridgeite 0°C	(Fe2+)(Fe3+)4(PO4)3(OH)5					Ksp(273) for Drouet Rockbridgeite.
		Dg kJ/mol	DH kJ/mol	S0 J/mol.K				Fe2+(Fe3+)4(PO4)3(OH)5 == - 11 H+ + Fe++ + 4 Fe+++ + 3 H2(PO4)- + 5 H2O
	Drouet 22	-4720.57						Ksp =( [Mn2+] * [Fe3+]^2 * [H2PO43-]^2 * [H2O]^10) / [H+]^6
								DeltaG(rxn)= 0 = DeltaG0 - (R*T*2.303*log [Ksp]) = DeltaG0 - (8.31446 * 273.15 *2.303 * log {Ksp})
								DeltaG0 =	11.7575	kJ
								log Ksp(273)	-2.24795

## Sheet: DrouetDeltaG
	From Table 2 of Drouet et al. (2022)					Veillard
	Contributing Ions					DG298
	298K, 1 bar	gi kJ/mol	hi kJ/mol	si J/mol.K		KJ/mol
	Cations
	Ca2+	-747.1	-776.4	47.2		-553.54
	Mg2+	-638	-669.3	30.2		-454.8
	Mn2+	-443	-462.1	70.5		-228
	Fe2+	-279	-290.8	90.2		-78.87
	Zn2+	-350.7	-367.1	70		-147.03
	Fe3+	-353.1	-391.5	52		-4.6
	Al3+	-796.2	-845.9	15.3		-485.34
	Na+	-334.6	-353.6	39.1		-261.9
	K+	-375.5	-398	40.6		-283.26
	H+	-110.4	-137.7	25.1		0
	Anions
	(PO4)3-	-821.7	-897.3	44		-1018.8
					H2(PO4)-	-1130.4
	OH-	-115.8	-140.6	33.4		-157.29
	F-	-278.1	-287.1	19.9		-278.82
	Hydration
	H2O	-237.1	-295.4	37.6		-237.18
	Calculations	gi kJ/mol	hi kJ/mol	si J/mol.K
	JahnsiteCaMnMg	-8587.5	-9593.7	825.7	CaMnMg2Fe3+2(PO4)4(OH)2.8H2O
	from Drouet	-8588	-9594	826	Success !
	JahsiteCaMnMn	-8197.5	-9179.3	906.3	CaMnMn2Fe3+2(PO4)4(OH)2.8H2O
	from Drouet	-8198	-9179	906	Success !
		verifying that I can replicate Drouet's calculations.
	Laueite	Mn(Fe3+)2(PO4)2(OH)2.8H2O							What is Ksp for Drouet laueite?			Ksp = [Mn2+]*[Fe3+]^2*[PO43-]^2*[OH]^2*[H2O]^8
		gi kJ/mol	hi kJ/mol	si J/mol.K						Mn(Fe3+)2(PO4)2(OH)2.8H2O == - 6 H+ + Mn++ + 2 Fe+++ + 2 H2(PO4)- + 10 H2O
	Drouet 22	-4921	-5684.1	630.1						DeltaG(rxn)= DeltaG0 - (R*T*2.303*log [Ksp]) = DeltaG0 - (8.31446 * 298.15 *2.303 * log {Ksp})
	Nriagu 74	-4884.8			from N&D table 2					DeltaG0 =	51.2	kJ
										log Ksp =	-8.96824
	Strunzite	Mn(Fe3+)2(PO4)2(OH)2.6H2O							What is Ksp for Drouet strunzite?			Ksp = [Mn2+]*[Fe3+]^2*[PO43-]^2*[OH]^2*[H2O]^6
		gi kJ/mol	hi kJ/mol	si J/mol.K						Mn(Fe3+)2(PO4)2(OH)2.8H2O == - 6 H+ + Mn++ + 2 Fe+++ + 2 H2(PO4)- + 8 H2O
	Drouet 22	-4446.8	-5093.3	554.9						DeltaG(rxn)= DeltaG0 - (R*T*2.303*log [Ksp]) = DeltaG0 - (8.31446 * 298.15 *2.303 * log {Ksp})
										DeltaG0 =	51.36	kJ
										log Ksp =	-8.99626
	Vivianite	(Fe2+)3(PO4)2.8H2O
		gi kJ/mol	hi kJ/mol	si J/mol.K
	Drouet 22	-4377.2	-5030.2	659.4
	Nriagu & Dell 74	-4377.3			their Table 1, from Nriagu J.O. (1972) Stability of vivianite and ion-pair formation in the system Fe3(PO4)2-H3PO4-H2O. Geochim. Cosmochim. Acta, 36, 459-470.
					& Nriagu J.O. (1972) Solubility equilibrium constant of strengite. Am. J. Sci.272,476484
	Ogorodova et al. 2017	-4439	-5119	571	Not consistent with other values
	Vieillard 1984	-4377.2			from Truesdell AH, Jones BF (1964) WATEQ, a computer program for calculating chemical equilibria of natural waters. J Res US Geol Surv 2:233-248
	AlBorno+ 1994	853.95			rel to oxides? Claims Ksp is consistent with literature data, esp Nriagu 72!
	Iglesia 2009	-4358.3			calculated by sum of oxides, like Drouet.
	Mn-Vivianite	(Mn2+)3(PO4)2.8H2O			not known as a mineral.				What is Ksp for Drouet Mn-vivianite?			Ksp = [Mn2+]^3*[(PO4)3-]^2*[OH]^2*[H2O]^8
		gi kJ/mol	hi kJ/mol	si J/mol.K						(Mn2+)3(PO4)2.8H2O == - 4 H+ + 3Mn++ + 2 H2(PO4)- + 8 H2O
	Drouet 22	-4869.2	-5544.1	600.3						DeltaG(rxn)= DeltaG0 - (R*T*2.303*log [Ksp]) = DeltaG0 - (8.31446 * 298.15 *2.303 * log {Ksp})
										DeltaG0 =	26.96	kJ
										log Ksp =	-4.72234
	Reddingite	(Mn2+)3(PO4)2.3H2O							What is Ksp for Drouet reddingite?			Ksp = [Mn2+]^3*[(PO4)3-]^2*[H2O]^3
		gi kJ/mol	hi kJ/mol	si J/mol.K						(Mn2+)3(PO4)2.3H2O == - 4 H+ + 3Mn++ + 2 H2(PO4)- + 3 H2O
	Drouet 22	-3683.7	-4067.1	412.3						DeltaG(rxn)= DeltaG0 - (R*T*2.303*log [Ksp]) = DeltaG0 - (8.31446 * 298.15 *2.303 * log {Ksp})
	Nriagu 74	-3643.8	Ksp	-2.2	Table 1, calculated there					DeltaG0 =	27.36	kJ
			`							log Ksp =	-4.7924
	Rockbridgeite	(Fe2+)(Fe3+)4(PO4)3(OH)5							What is Ksp for Drouet rockbridgeite?			Ksp = [Fe2+]*[Fe3+]^4*[PO43-]^3*[OH]^5
		gi kJ/mol	hi kJ/mol	si J/mol.K						Fe2+(Fe3+)4(PO4)3(OH)5 == - 11 H+ + Fe++ + 4 Fe+++ + 3 H2(PO4)- + 5 H2O
	Drouet 22	-4735.5	-5251.7	597.2						DeltaG(rxn)= DeltaG0 - (R*T*2.303*log [Ksp]) = DeltaG0 - (8.31446 * 298.15 *2.303 * log {Ksp})
	Nriagu 74	-4735.45								DeltaG0 =	61.13	kJ
										log Ksp =	-10.7076
	Tinticite	(Fe3+)3(PO4)2(OH)3.3H2O
		gi kJ/mol	hi kJ/mol	si J/mol.K
	Drouet 22	-3761.4
	Nriagu 74	-3766.02
	Laueite RXNs
	MnFe3+2(PO4)2(OH)2.8H2O		=	2 Fe2+ + Mn2+ + 2 (PO4)3- + 8 H2O + 2 OH- + - 2 e-
	MnFe3+2(PO4)2(OH)2.8H2O		=	2 Fe2+ + Mn2+ + 2 H2(PO4)- + 10 H2O -6 H+ - 2 e-
	MnFe3+2(PO4)2(OH)2.8H2O + 6 H+ + 2 e-			=	2 Fe2+ + Mn2+ + 2 H2(PO4)- + 10 H2O
						As Nriagu & Dell write reaction, gives proper slope of -3
	laueite = vivianite + reddingite
	3 MnFe3+2(PO4)2(OH)2.8H2O		=	2 Fe3(PO4)2.8H2O + 1 Mn3(PO4)2.3H2O + 5 H2O + 6 OH- -6 e-
						? ? consistent with slope of rxn in Nriagu 1974
				2 Fe3(PO4)2.8H2O + 1 Mn3(PO4)2.3H2O + 11 H2O - 6 H+ -6 e-
						rewritten with H+ instead of OH-
	3 Mn(Fe3+)2(PO4)2(OH)2.8H2O + 6 H+ + 6 e-			=	2 (Fe2+)3(PO4)2.8H2O + 1 Mn3(PO4)2.3H2O + 11 H2O
					slope -1, NOT consistent with slope of rxn in Fig 3 of Nriagu & Dell 1974
						But consistent with Fig. 4 of Nriagu & Dell 1974
	Laueite Thermo	Mn(Fe3+)2(PO4)2(OH)2.8H2O
	Calculated Drouet	gi kJ/mol	hi kJ/mol	si J/mol.K
		-4921	-5684.1	630.1
