# Supplementary material
Source: MDPI journal article supplement (https://www.mdpi.com/2075-163X/13/9/1122)
Supplement: s1 [file s1 › ThermoddemV1.10_Groken_june2023.txt]

dataset of thermodynamic data for gwb programs
dataset format: oct94
activity model: debye-huckel
*  Geochemist Workbench database, data from Thermoddem_MAJ2020
*  generated by Thermobridge 1.0.3.4 date :12/15/2020 5:30:59 AM
*  Output package: gwb
*  augmented with Mn-Fe phosphate minerals, AHT, from 
*  74nriagu and augmented with 22_Drouet 
*    laueite, strunzite, rockbridgeite, reddingite, vivianite-Mn

*  This version is relatively untested. Kindly send comments or
*  corrections to Philippe Blanc at p.blanc@brgm.fr

* temperatures
         0.0000   25.0000   60.0000  100.0000
       150.0000  200.0000  250.0000  300.0000
* pressures
         1.0000    1.0000    1.0000    1.0000
         4.7616   15.5493   39.7617   85.8790
* debye huckel a (adh)
         0.4901    0.5095    0.5450    0.5986
         0.6867    0.8046    0.9710    1.2414
* debye huckel b (bdh)
         0.3245    0.3284    0.3343    0.3420
         0.3528    0.3647    0.3782    0.3950
* bdot
         0.0374    0.0410    0.0438    0.0460
         0.0470    0.0470    0.0340    0.0000
* c co2 1
         0.1224    0.1127    0.0934    0.0802
         0.0843    0.0989    0.1371    0.1967
* c co2 2
        -0.0047   -0.0105   -0.0036   -0.0015
        -0.0118   -0.0104   -0.0071   -0.0181
* c co2 3
        -0.0004    0.0015    0.0001    0.0005
         0.0031    0.0014   -0.0029   -0.0025
* c co2 4
         0.0000    0.0000    0.0000    0.0000
         0.0000    0.0000    0.0000    0.0000
* c h2o 1
      0.500000E+03   0.145397E+01   0.500000E+03   0.155510E+01
      0.162250E+01   0.500000E+03   0.500000E+03   0.500000E+03
* c h2o 2
      0.500000E+03   0.223570E-01   0.500000E+03   0.364780E-01
      0.458910E-01   0.500000E+03   0.500000E+03   0.500000E+03
* c h2o 3
      0.500000E+03   0.938040E-02   0.500000E+03   0.643660E-02
      0.452210E-02   0.500000E+03   0.500000E+03   0.500000E+03
* c h2o 4
      0.500000E+03  -0.536200E-03   0.500000E+03  -0.713200E-03
     -0.831200E-03   0.500000E+03   0.500000E+03   0.500000E+03
* log k for eh reaction
       -92.2693  -83.0896  -72.5872  -63.0348
       -53.6783  -46.3421  -40.4463  -35.6139
* log k for o2 gas solubility
        -2.6575   -2.8992   -3.0646   -3.1109
        -3.0444   -2.8941   -2.6882   -2.4307
* log k for h2 gas solubility
        -2.9789   -3.0762   -3.1126   -3.0668
        -2.9304   -2.7391   -2.5085   -2.2346
* log k for n2 gas solubility
       124.4756  113.2530  100.4714   88.8631
        77.4908   68.5651   61.3851   55.4965

    84 elements

Silver          (Ag)          mole wt.=  107.8680
Aluminum        (Al)          mole wt.=  26.9820
Argon           (Ar)          mole wt.=  39.9480
Arsenic         (As)          mole wt.=  74.9220
Gold            (Au)          mole wt.=  196.9670
Boron           (B )          mole wt.=  10.8110
Barium          (Ba)          mole wt.=  137.3400
Beryllium       (Be)          mole wt.=  9.0120
Bismuth         (Bi)          mole wt.=  208.9800
Bromine         (Br)          mole wt.=  79.9040
Carbon          (C )          mole wt.=  12.0110
Calcium         (Ca)          mole wt.=  40.0780
Cadmium         (Cd)          mole wt.=  112.4100
Cerium          (Ce)          mole wt.=  140.1200
Chlorine        (Cl)          mole wt.=  35.4520
Cobalt          (Co)          mole wt.=  58.9330
Chromium        (Cr)          mole wt.=  51.9660
Cesium          (Cs)          mole wt.=  132.9050
Copper          (Cu)          mole wt.=  63.5460
Dysprosium      (Dy)          mole wt.=  162.5000
Erbium          (Er)          mole wt.=  167.2600
Europium        (Eu)          mole wt.=  151.9640
Fluorine        (F )          mole wt.=  18.9980
Iron            (Fe)          mole wt.=  55.8470
Francium        (Fr)          mole wt.=  223.0200
Gallium         (Ga)          mole wt.=  69.7230
Gadolinium      (Gd)          mole wt.=  157.2500
Germanium       (Ge)          mole wt.=  72.6100
Hydrogen        (H )          mole wt.=  1.0080
Helium          (He)          mole wt.=  4.0030
Hafnium         (Hf)          mole wt.=  178.4900
Mercury         (Hg)          mole wt.=  200.5900
Holmium         (Ho)          mole wt.=  164.9300
Iodine          (I )          mole wt.=  126.9040
Indium          (In)          mole wt.=  114.8200
Potassium       (K )          mole wt.=  39.0980
Krypton         (Kr)          mole wt.=  83.8000
Lanthanum       (La)          mole wt.=  138.9060
Lithium         (Li)          mole wt.=  6.9410
Lutetium        (Lu)          mole wt.=  174.9670
Magnesium       (Mg)          mole wt.=  24.3050
Manganese       (Mn)          mole wt.=  54.9380
Molybdenum      (Mo)          mole wt.=  95.9400
Nitrogen        (N )          mole wt.=  14.0070
Sodium          (Na)          mole wt.=  22.9900
Niobium         (Nb)          mole wt.=  92.9060
Neodymium       (Nd)          mole wt.=  144.2400
Neon            (Ne)          mole wt.=  20.1800
Nickel          (Ni)          mole wt.=  58.6930
Oxygen          (O )          mole wt.=  15.9990
Phosphorus      (P )          mole wt.=  30.9740
Lead            (Pb)          mole wt.=  207.2000
Palladium       (Pd)          mole wt.=  106.4200
Prometium       (Pm)          mole wt.=  144.9130
Praseodymium    (Pr)          mole wt.=  140.9080
Platinum        (Pt)          mole wt.=  195.0800
Radium          (Ra)          mole wt.=  226.0250
Rubidium        (Rb)          mole wt.=  85.4680
Rhenium         (Re)          mole wt.=  186.2700
Rhodium         (Rh)          mole wt.=  102.9060
Radon           (Rn)          mole wt.=  222.0180
Ruthenium       (Ru)          mole wt.=  101.0700
Sulfur          (S )          mole wt.=  32.0660
Antimony        (Sb)          mole wt.=  121.7600
Scandium        (Sc)          mole wt.=  44.9560
Selenium        (Se)          mole wt.=  78.9600
Silicon         (Si)          mole wt.=  28.0860
Samarium        (Sm)          mole wt.=  150.3600
Tin             (Sn)          mole wt.=  118.7100
Strontium       (Sr)          mole wt.=  87.6200
Terbium         (Tb)          mole wt.=  158.9250
Technetium      (Tc)          mole wt.=  97.9070
Thorium         (Th)          mole wt.=  232.0380
Titanium        (Ti)          mole wt.=  47.8700
Thallium        (Tl)          mole wt.=  204.3830
Thulium         (Tm)          mole wt.=  168.9340
Uranium         (U )          mole wt.=  238.0290
Vanadium        (V )          mole wt.=  50.9420
Tungsten        (W )          mole wt.=  183.8400
Xenon           (Xe)          mole wt.=  131.2900
Yttrium         (Y )          mole wt.=  88.9060
Ytterbium       (Yb)          mole wt.=  173.0400
Zinc            (Zn)          mole wt.=  65.3900
Zirconium       (Zr)          mole wt.=  91.2240

-end-

 85 basis species

H2O
      charge=  0.0      ion size=  3.4 A      mole wt.=  18.0150 g
      2 elements in species
      2.0000 H              1.0000 O
*    References DGf or LogK n/a ; DHf 89cox/wag
*    S° 89cox/wag ; Cp n/a


Al+++
      charge=  3.0      ion size=  9.0 A      mole wt.=  26.9820 g
      1 element in species
      1.0000 Al
*    References DGf or LogK 06bla/pia ; DHf 89cox/wag
*    S° n/a ; Cp 95pok/hel


Ar(aq)
      charge=  0.0      ion size=  3.4 A      mole wt.=  39.9480 g
      1 element in species
      1.0000 Ar
*    References DGf or LogK 89bsho/hel, 01sch/sho ; DHf n/a
*    S° 89bsho/hel, 01sch/sho ; Cp 89bsho/hel, 01sch/sho


B(OH)3(aq)
      charge=  0.0      ion size=  3.4 A      mole wt.=  61.8330 g
      3 elements in species
      1.0000 B              3.0000 H              3.0000 O
*    References DGf or LogK 95pok/sch ; DHf n/a
*    S° 95pok/sch ; Cp 95pok/sch


Ba++
      charge=  2.0      ion size=  5.0 A      mole wt.=  137.3400 g
      1 element in species
      1.0000 Ba
*    References DGf or LogK 97asho/sas ; DHf n/a
*    S° 97asho/sas ; Cp 97asho/sas


Be++
      charge=  2.0      ion size=  8.0 A      mole wt.=  9.0120 g
      1 element in species
      1.0000 Be
*    References DGf or LogK 97asho/sas ; DHf n/a
*    S° 97asho/sas ; Cp 97asho/sas


Bi+++
      charge=  3.0      ion size=  8.2 A      mole wt.=  208.9800 g
      1 element in species
      1.0000 Bi
*    References DGf or LogK 97asho/sas ; DHf n/a
*    S° 97asho/sas ; Cp 97asho/sas


Ca++
      charge=  2.0      ion size=  6.0 A      mole wt.=  40.0780 g
      1 element in species
      1.0000 Ca
*    References DGf or LogK n/a ; DHf 89cox/wag
*    S° 89cox/wag ; Cp 97asho/sas


Cd++
      charge=  2.0      ion size=  5.0 A      mole wt.=  112.4100 g
      1 element in species
      1.0000 Cd
*    References DGf or LogK n/a ; DHf 89cox/wag
*    S° 89cox/wag ; Cp 97asho/sas


Cs+
      charge=  1.0      ion size=  2.5 A      mole wt.=  132.9050 g
      1 element in species
      1.0000 Cs
*    References DGf or LogK 97asho/sas ; DHf n/a
*    S° 97asho/sas ; Cp 97asho/sas


F-
      charge=  -1.0      ion size=  3.5 A      mole wt.=  18.9980 g
      1 element in species
      1.0000 F
*    References DGf or LogK n/a ; DHf 89cox/wag
*    S° 89cox/wag ; Cp 97asho/sas


Fr+
      charge=  1.0      ion size=  4.1 A      mole wt.=  223.0200 g
      1 element in species
      1.0000 Fr
*    References DGf or LogK 97asho/sas ; DHf n/a
*    S° 97asho/sas ; Cp 97asho/sas


Ga+++
      charge=  3.0      ion size=  4.5 A      mole wt.=  69.7230 g
      1 element in species
      1.0000 Ga
*    References DGf or LogK 97ben/dia ; DHf n/a
*    S° 97ben/dia ; Cp 97ben/dia


Ge(OH)4(aq)
      charge=  0.0      ion size=  3.4 A      mole wt.=  140.6390 g
      3 elements in species
      1.0000 Ge              4.0000 H              4.0000 O
*    References DGf or LogK 05pok/rou ; DHf n/a
*    S° 05pok/rou ; Cp 05pok/rou


H4SiO4(aq)
      charge=  0.0      ion size=  3.4 A      mole wt.=  96.1150 g
      3 elements in species
      4.0000 H              4.0000 O              1.0000 Si
*    References DGf or LogK 01ste ; DHf n/a
*    S° 01ste ; Cp 01ste


He(aq)
      charge=  0.0      ion size=  3.4 A      mole wt.=  4.0030 g
      1 element in species
      1.0000 He
*    References DGf or LogK 89bsho/hel, 01sch/sho ; DHf n/a
*    S° 89bsho/hel, 01sch/sho ; Cp 89bsho/hel, 01sch/sho


Hf++++
      charge=  4.0      ion size=  11.6 A      mole wt.=  178.4900 g
      1 element in species
      1.0000 Hf
*    References DGf or LogK 97asho/sas ; DHf n/a
*    S° 97asho/sas ; Cp 97asho/sas


In+++
      charge=  3.0      ion size=  9.0 A      mole wt.=  114.8200 g
      1 element in species
      1.0000 In
*    References DGf or LogK 97asho/sas ; DHf n/a
*    S° 97asho/sas ; Cp 97asho/sas


K+
      charge=  1.0      ion size=  3.0 A      mole wt.=  39.0980 g
      1 element in species
      1.0000 K
*    References DGf or LogK n/a ; DHf 89cox/wag
*    S° 89cox/wag ; Cp 97asho/sas


Kr(aq)
      charge=  0.0      ion size=  3.4 A      mole wt.=  83.8000 g
      1 element in species
      1.0000 Kr
*    References DGf or LogK 89bsho/hel, 01sch/sho ; DHf n/a
*    S° 89bsho/hel, 01sch/sho ; Cp 89bsho/hel, 01sch/sho


Li+
      charge=  1.0      ion size=  6.0 A      mole wt.=  6.9410 g
      1 element in species
      1.0000 Li
*    References DGf or LogK 97asho/sas ; DHf n/a
*    S° 97asho/sas ; Cp 97asho/sas


Mg++
      charge=  2.0      ion size=  6.5 A      mole wt.=  24.3050 g
      1 element in species
      1.0000 Mg
*    References DGf or LogK n/a ; DHf 89cox/wag
*    S° 89cox/wag ; Cp 97asho/sas


MoO4--
      charge=  -2.0      ion size=  4.5 A      mole wt.=  159.9380 g
      2 elements in species
      1.0000 Mo              4.0000 O
*    References DGf or LogK 97asho/sas ; DHf n/a
*    S° 97asho/sas ; Cp 97asho/sas


Na+
      charge=  1.0      ion size=  4.2 A      mole wt.=  22.9900 g
      1 element in species
      1.0000 Na
*    References DGf or LogK n/a ; DHf 89cox/wag
*    S° 89cox/wag ; Cp 97asho/sas


NbO3-
      charge=  -1.0      ion size=  3.6 A      mole wt.=  140.9050 g
      2 elements in species
      1.0000 Nb              3.0000 O
*    References DGf or LogK 97asho/sas ; DHf n/a
*    S° 97asho/sas ; Cp 97asho/sas


Ne(aq)
      charge=  0.0      ion size=  3.4 A      mole wt.=  20.1800 g
      1 element in species
      1.0000 Ne
*    References DGf or LogK 89bsho/hel, 01sch/sho ; DHf n/a
*    S° 89bsho/hel, 01sch/sho ; Cp 89bsho/hel, 01sch/sho


Ni++
      charge=  2.0      ion size=  6.0 A      mole wt.=  58.6930 g
      1 element in species
      1.0000 Ni
*    References DGf or LogK n/a ; DHf 10pal/gam
*    S° 10pal/gam ; Cp 97asho/sas


Pb++
      charge=  2.0      ion size=  4.5 A      mole wt.=  207.2000 g
      1 element in species
      1.0000 Pb
*    References DGf or LogK n/a ; DHf 89cox/wag
*    S° 89cox/wag ; Cp 97asho/sas


Pd++
      charge=  2.0      ion size=  5.7 A      mole wt.=  106.4200 g
      1 element in species
      1.0000 Pd
*    References DGf or LogK 98sas/sho ; DHf n/a
*    S° 98sas/sho ; Cp 98sas/sho


Pt++
      charge=  2.0      ion size=  5.7 A      mole wt.=  195.0800 g
      1 element in species
      1.0000 Pt
*    References DGf or LogK 98sas/sho ; DHf n/a
*    S° 98sas/sho ; Cp 98sas/sho


Ra++
      charge=  2.0      ion size=  5.0 A      mole wt.=  226.0250 g
      1 element in species
      1.0000 Ra
*    References DGf or LogK 97asho/sas ; DHf n/a
*    S° 97asho/sas ; Cp 97asho/sas


Rb+
      charge=  1.0      ion size=  2.5 A      mole wt.=  85.4680 g
      1 element in species
      1.0000 Rb
*    References DGf or LogK 97asho/sas ; DHf n/a
*    S° 97asho/sas ; Cp 97asho/sas


ReO4-
      charge=  -1.0      ion size=  3.6 A      mole wt.=  250.2680 g
      2 elements in species
      4.0000 O              1.0000 Re
*    References DGf or LogK 97asho/sas ; DHf n/a
*    S° 97asho/sas ; Cp 97asho/sas


Rn(aq)
      charge=  0.0      ion size=  3.4 A      mole wt.=  222.0180 g
      1 element in species
      1.0000 Rn
*    References DGf or LogK 89bsho/hel, 01sch/sho ; DHf n/a
*    S° 89bsho/hel, 01sch/sho ; Cp 89bsho/hel, 01sch/sho


Sb(OH)3(aq)
      charge=  0.0      ion size=  3.4 A      mole wt.=  172.7820 g
      3 elements in species
      3.0000 H              3.0000 O              1.0000 Sb
*    References DGf or LogK 03zot/shi ; DHf n/a
*    S° 03zot/shi ; Cp 03zot/shi


Sc+++
      charge=  3.0      ion size=  9.0 A      mole wt.=  44.9560 g
      1 element in species
      1.0000 Sc
*    References DGf or LogK 97asho/sas ; DHf n/a
*    S° 97asho/sas ; Cp 97asho/sas


Sn++
      charge=  2.0      ion size=  6.0 A      mole wt.=  118.7100 g
      1 element in species
      1.0000 Sn
*    References DGf or LogK 97asho/sas ; DHf n/a
*    S° 97asho/sas ; Cp 97asho/sas


Sr++
      charge=  2.0      ion size=  5.0 A      mole wt.=  87.6200 g
      1 element in species
      1.0000 Sr
*    References DGf or LogK n/a ; DHf 97asho/sas
*    S° 97asho/sas ; Cp 97asho/sas


TcO4-
      charge=  -1.0      ion size=  3.6 A      mole wt.=  161.9050 g
      2 elements in species
      4.0000 O              1.0000 Tc
*    References DGf or LogK 97asho/sas ; DHf n/a
*    S° 97asho/sas ; Cp 97asho/sas


Th++++
      charge=  4.0      ion size=  11.0 A      mole wt.=  232.0380 g
      1 element in species
      1.0000 Th
*    References DGf or LogK 97asho/sas ; DHf n/a
*    S° 97asho/sas ; Cp 97asho/sas


Ti(OH)4(aq)
      charge=  0.0      ion size=  3.4 A      mole wt.=  115.8990 g
      3 elements in species
      4.0000 H              4.0000 O              1.0000 Ti
*    References DGf or LogK 01ste ; DHf n/a
*    S° 01ste ; Cp 01ste


WO4--
      charge=  -2.0      ion size=  5.0 A      mole wt.=  247.8380 g
      2 elements in species
      4.0000 O              1.0000 W
*    References DGf or LogK 97asho/sas ; DHf n/a
*    S° 97asho/sas ; Cp 97asho/sas


Xe(aq)
      charge=  0.0      ion size=  3.4 A      mole wt.=  131.2900 g
      1 element in species
      1.0000 Xe
*    References DGf or LogK 89bsho/hel, 01sch/sho ; DHf n/a
*    S° 89bsho/hel, 01sch/sho ; Cp 89bsho/hel, 01sch/sho


Y+++
      charge=  3.0      ion size=  9.0 A      mole wt.=  88.9060 g
      1 element in species
      1.0000 Y
*    References DGf or LogK 97asho/sas ; DHf n/a
*    S° 97asho/sas ; Cp 97asho/sas


Zn++
      charge=  2.0      ion size=  6.0 A      mole wt.=  65.3900 g
      1 element in species
      1.0000 Zn
*    References DGf or LogK n/a ; DHf 97asho/sas
*    S° 97asho/sas ; Cp 97asho/sas


ZrO++
      charge=  2.0      ion size=  5.7 A      mole wt.=  107.2230 g
      2 elements in species
      1.0000 O              1.0000 Zr
*    References DGf or LogK 97asho/sas ; DHf n/a
*    S° 97asho/sas ; Cp 97asho/sas


Ag+
      charge=  1.0      ion size=  2.5 A      mole wt.=  107.8680 g
      1 element in species
      1.0000 Ag
*    References DGf or LogK 01aki/zot ; DHf n/a
*    S° 01aki/zot ; Cp 01aki/zot


Au+
      charge=  1.0      ion size=  4.1 A      mole wt.=  196.9670 g
      1 element in species
      1.0000 Au
*    References DGf or LogK 01aki/zot ; DHf n/a
*    S° 01aki/zot ; Cp 01aki/zot


Br-
      charge=  -1.0      ion size=  3.0 A      mole wt.=  79.9040 g
      1 element in species
      1.0000 Br
*    References DGf or LogK 97asho/sas ; DHf n/a
*    S° 97asho/sas ; Cp 97asho/sas


Ce+++
      charge=  3.0      ion size=  9.0 A      mole wt.=  140.1200 g
      1 element in species
      1.0000 Ce
*    References DGf or LogK 97asho/sas ; DHf n/a
*    S° 97asho/sas ; Cp 97asho/sas


Cl-
      charge=  -1.0      ion size=  3.0 A      mole wt.=  35.4520 g
      1 element in species
      1.0000 Cl
*    References DGf or LogK n/a ; DHf 89cox/wag
*    S° 89cox/wag ; Cp 97asho/sas


Co++
      charge=  2.0      ion size=  6.0 A      mole wt.=  58.9330 g
      1 element in species
      1.0000 Co
*    References DGf or LogK n/a ; DHf 98ply/zha
*    S° 98ply/zha ; Cp 97asho/sas


CrO4--
      charge=  -2.0      ion size=  4.0 A      mole wt.=  115.9640 g
      2 elements in species
      1.0000 Cr              4.0000 O
*    References DGf or LogK n/a ; DHf 04chi
*    S° 04chi ; Cp 97asho/sas


Cu++
      charge=  2.0      ion size=  6.0 A      mole wt.=  63.5460 g
      1 element in species
      1.0000 Cu
*    References DGf or LogK 89cox/wag ; DHf n/a
*    S° 97asho/sas ; Cp 97asho/sas


Dy+++
      charge=  3.0      ion size=  8.2 A      mole wt.=  162.5000 g
      1 element in species
      1.0000 Dy
*    References DGf or LogK 97asho/sas ; DHf n/a
*    S° 97asho/sas ; Cp 97asho/sas


Er+++
      charge=  3.0      ion size=  8.2 A      mole wt.=  167.2600 g
      1 element in species
      1.0000 Er
*    References DGf or LogK 97asho/sas ; DHf n/a
*    S° 97asho/sas ; Cp 97asho/sas


Eu+++
      charge=  3.0      ion size=  8.2 A      mole wt.=  151.9640 g
      1 element in species
      1.0000 Eu
*    References DGf or LogK 97asho/sas ; DHf n/a
*    S° 97asho/sas ; Cp 97asho/sas


Fe++
      charge=  2.0      ion size=  6.0 A      mole wt.=  55.8470 g
      1 element in species
      1.0000 Fe
*    References DGf or LogK 95par/kho ; DHf 95par/kho
*    S° n/a ; Cp 88sho/hel,85hel,89bsho/hel,97asho/sas


Gd+++
      charge=  3.0      ion size=  4.5 A      mole wt.=  157.2500 g
      1 element in species
      1.0000 Gd
*    References DGf or LogK 97asho/sas ; DHf n/a
*    S° 97asho/sas ; Cp 97asho/sas


H+
      charge=  1.0      ion size=  9.0 A      mole wt.=  1.0080 g
      1 element in species
      1.0000 H
*    References DGf or LogK n/a ; DHf By convention
*    S° By convention ; Cp n/a


H2AsO4-
      charge=  -1.0      ion size=  3.6 A      mole wt.=  140.9350 g
      3 elements in species
      1.0000 As              2.0000 H              4.0000 O
*    References DGf or LogK 97asho/sas ; DHf n/a
*    S° 97asho/sas ; Cp 97asho/sas


H2PO4-
      charge=  -1.0      ion size=  4.2 A      mole wt.=  96.9870 g
      3 elements in species
      2.0000 H              4.0000 O              1.0000 P
*    References DGf or LogK n/a ; DHf 89cox/wag
*    S° 89cox/wag ; Cp 97asho/sas


HCO3-
      charge=  -1.0      ion size=  4.2 A      mole wt.=  61.0170 g
      3 elements in species
      1.0000 C              1.0000 H              3.0000 O
*    References DGf or LogK n/a ; DHf 89cox/wag
*    S° 89cox/wag ; Cp 97asho/sas


Hg++
      charge=  2.0      ion size=  5.0 A      mole wt.=  200.5900 g
      1 element in species
      1.0000 Hg
*    References DGf or LogK n/a ; DHf 89cox/wag
*    S° 89cox/wag ; Cp 88sho/hel


Ho+++
      charge=  3.0      ion size=  8.2 A      mole wt.=  164.9300 g
      1 element in species
      1.0000 Ho
*    References DGf or LogK 97asho/sas ; DHf n/a
*    S° 97asho/sas ; Cp 97asho/sas


I-
      charge=  -1.0      ion size=  3.0 A      mole wt.=  126.9040 g
      1 element in species
      1.0000 I
*    References DGf or LogK 97asho/sas ; DHf n/a
*    S° 97asho/sas ; Cp 97asho/sas


La+++
      charge=  3.0      ion size=  9.0 A      mole wt.=  138.9060 g
      1 element in species
      1.0000 La
*    References DGf or LogK 97asho/sas ; DHf n/a
*    S° 97asho/sas ; Cp 97asho/sas


Lu+++
      charge=  3.0      ion size=  8.2 A      mole wt.=  174.9670 g
      1 element in species
      1.0000 Lu
*    References DGf or LogK 97asho/sas ; DHf n/a
*    S° 97asho/sas ; Cp 97asho/sas


Mn++
      charge=  2.0      ion size=  6.0 A      mole wt.=  54.9380 g
      1 element in species
      1.0000 Mn
*    References DGf or LogK 97asho/sas ; DHf n/a
*    S° 97asho/sas ; Cp 97asho/sas


Nd+++
      charge=  3.0      ion size=  9.0 A      mole wt.=  144.2400 g
      1 element in species
      1.0000 Nd
*    References DGf or LogK 97asho/sas ; DHf n/a
*    S° 97asho/sas ; Cp 97asho/sas


NH3(aq)
      charge=  0.0      ion size=  3.4 A      mole wt.=  17.0310 g
      2 elements in species
      3.0000 H              1.0000 N
*    References DGf or LogK 89bsho/hel, 01sch/sho ; DHf n/a
*    S° 89bsho/hel, 01sch/sho ; Cp 89bsho/hel, 01sch/sho


Pm+++
      charge=  3.0      ion size=  8.2 A      mole wt.=  144.9130 g
      1 element in species
      1.0000 Pm
*    References DGf or LogK 97asho/sas ; DHf n/a
*    S° 97asho/sas ; Cp 97asho/sas


Pr+++
      charge=  3.0      ion size=  9.0 A      mole wt.=  140.9080 g
      1 element in species
      1.0000 Pr
*    References DGf or LogK 97asho/sas ; DHf n/a
*    S° 97asho/sas ; Cp 97asho/sas


Rh++
      charge=  2.0      ion size=  5.7 A      mole wt.=  102.9060 g
      1 element in species
      1.0000 Rh
*    References DGf or LogK 98sas/sho ; DHf n/a
*    S° 98sas/sho ; Cp 98sas/sho


RuO4--
      charge=  -2.0      ion size=  4.7 A      mole wt.=  165.0680 g
      2 elements in species
      4.0000 O              1.0000 Ru
*    References DGf or LogK 97asho/sas ; DHf n/a
*    S° 97asho/sas ; Cp 97asho/sas


SeO3--
      charge=  -2.0      ion size=  4.7 A      mole wt.=  126.9580 g
      2 elements in species
      3.0000 O              1.0000 Se
*    References DGf or LogK 97asho/sas ; DHf n/a
*    S° 97asho/sas ; Cp 97asho/sas


Sm+++
      charge=  3.0      ion size=  9.0 A      mole wt.=  150.3600 g
      1 element in species
      1.0000 Sm
*    References DGf or LogK 97asho/sas ; DHf n/a
*    S° 97asho/sas ; Cp 97asho/sas


SO4--
      charge=  -2.0      ion size=  4.0 A      mole wt.=  96.0640 g
      2 elements in species
      4.0000 O              1.0000 S
*    References DGf or LogK n/a ; DHf 89cox/wag
*    S° 89cox/wag ; Cp 97asho/sas


Tb+++
      charge=  3.0      ion size=  8.2 A      mole wt.=  158.9250 g
      1 element in species
      1.0000 Tb
*    References DGf or LogK 97asho/sas ; DHf n/a
*    S° 97asho/sas ; Cp 97asho/sas


Tl+
      charge=  1.0      ion size=  2.5 A      mole wt.=  204.3830 g
      1 element in species
      1.0000 Tl
*    References DGf or LogK 97asho/sas ; DHf n/a
*    S° 97asho/sas ; Cp 97asho/sas


Tm+++
      charge=  3.0      ion size=  8.2 A      mole wt.=  168.9340 g
      1 element in species
      1.0000 Tm
*    References DGf or LogK 97asho/sas ; DHf n/a
*    S° 97asho/sas ; Cp 97asho/sas


UO2++
      charge=  2.0      ion size=  5.7 A      mole wt.=  270.0280 g
      2 elements in species
      2.0000 O              1.0000 U
*    References DGf or LogK 97asho/sas ; DHf n/a
*    S° 97asho/sas ; Cp 97asho/sas


VO++
      charge=  2.0      ion size=  5.7 A      mole wt.=  66.9410 g
      2 elements in species
      1.0000 O              1.0000 V
*    References DGf or LogK 97asho/sas ; DHf n/a
*    S° 97asho/sas ; Cp 97asho/sas


Yb+++
      charge=  3.0      ion size=  9.0 A      mole wt.=  173.0400 g
      1 element in species
      1.0000 Yb
*    References DGf or LogK 00deb/cas ; DHf n/a
*    S° 00deb/cas ; Cp 97asho/sas


O2(aq)
      charge=  0.0      ion size=  3.4 A      mole wt.=  31.9990 g
      1 element in species
      2.0000 O
*    References DGf or LogK n/a ; DHf By convention
*    S° 89bsho/hel, 01sch/sho ; Cp 89bsho/hel, 01sch/sho


-end-

 83 redox couples

Ag++
*     formula= Ag(2)
      charge=  2.0      ion size=  5.7 A      mole wt.=  107.8680 g
      4 species in reaction
      0.2500 O2(aq)           1.0000 Ag+           1.0000 H+
      -0.5000 H2O           
      12.5183    12.1272    11.7177    11.3916
      11.1379    11.0142    10.9995    11.0917
*    References DGf or LogK 88sho/hel ; DHf n/a
*    S° 88sho/hel ; Cp 88sho/hel


AsH3(aq)
*     formula= As(-3)
      charge=  0.0      ion size=  3.4 A      mole wt.=  77.9450 g
      3 species in reaction
      1.0000 H2AsO4-           1.0000 H+           -2.0000 O2(aq)           
      170.3332    155.1914    137.4534    120.9061
      104.2229    90.6905    79.3819    69.6057
*    References DGf or LogK 92wol ; DHf n/a
*    S° 01sch/sho ; Cp 01sch/sho


Au+++
*     formula= Au(3)
      charge=  3.0      ion size=  8.2 A      mole wt.=  196.9670 g
      4 species in reaction
      0.5000 O2(aq)           1.0000 Au+           2.0000 H+
      -1.0000 H2O           
      3.4192    4.3563    5.4707    6.5312
      7.6431    8.6120    9.5140    10.4153
*    References DGf or LogK 97asho/sas ; DHf n/a
*    S° 97asho/sas ; Cp 97asho/sas


Br3-
*     formula= Br(-0.3)
      charge=  -1.0      ion size=  3.6 A      mole wt.=  239.7120 g
      4 species in reaction
      0.5000 O2(aq)           3.0000 Br-           2.0000 H+
      -1.0000 H2O           
      -7.8730    -7.0638    -6.3284    -5.8597
      -5.6598    -5.7883    -6.2246    -7.0626
*    References DGf or LogK 88sho/hel ; DHf n/a
*    S° 88sho/hel ; Cp 88sho/hel


BrO-
*     formula= Br(1)
      charge=  -1.0      ion size=  3.6 A      mole wt.=  95.9030 g
      2 species in reaction
      0.5000 O2(aq)           1.0000 Br-           
      11.4783    10.9161    10.3293    9.8437
      9.4166    9.1236    8.9243    8.7999
*    References DGf or LogK 97asho/sas ; DHf n/a
*    S° 97asho/sas ; Cp 97asho/sas


BrO3-
*     formula= Br(5)
      charge=  -1.0      ion size=  3.5 A      mole wt.=  127.9020 g
      2 species in reaction
      1.5000 O2(aq)           1.0000 Br-           
      18.3796    17.1428    15.8936    14.9091
      14.1030    13.6034    13.3087    13.1674
*    References DGf or LogK 97asho/sas ; DHf n/a
*    S° 97asho/sas ; Cp 97asho/sas


BrO4-
*     formula= Br(7)
      charge=  -1.0      ion size=  3.6 A      mole wt.=  143.9020 g
      2 species in reaction
      2.0000 O2(aq)           1.0000 Br-           
      35.7297    33.1020    30.2851    27.8987
      25.7452    24.2111    23.1020    22.3091
*    References DGf or LogK 97asho/sas ; DHf n/a
*    S° 97asho/sas ; Cp 97asho/sas


Ce++
*     formula= Ce(2)
      charge=  2.0      ion size=  5.7 A      mole wt.=  140.1200 g
      4 species in reaction
      1.0000 Ce+++           0.5000 H2O           -0.2500 O2(aq)
      -1.0000 H+           
      93.7656    85.0490    74.9529    65.6478
      56.3874    48.9792    42.8802    37.7304
*    References DGf or LogK 97asho/sas ; DHf n/a
*    S° 97asho/sas ; Cp 97asho/sas


Ce++++
*     formula= Ce(4)
      charge=  4.0      ion size=  11.0 A      mole wt.=  140.1200 g
      4 species in reaction
      0.2500 O2(aq)           1.0000 Ce+++           1.0000 H+
      -0.5000 H2O           
      7.7497    8.0422    8.2770    8.4070
      8.4638    8.4709    8.4722    8.4921
*    References DGf or LogK 97asho/sas ; DHf n/a
*    S° 97asho/sas ; Cp 97asho/sas


CH4(aq)
*     formula= C(-4)
      charge=  0.0      ion size=  3.4 A      mole wt.=  16.0420 g
      4 species in reaction
      1.0000 HCO3-           1.0000 H+           1.0000 H2O
      -2.0000 O2(aq)           
      157.8087    144.1185    128.0313    112.9900
      97.7947    85.4423    75.0912    66.1015
*    References DGf or LogK 01sch/sho ; DHf n/a
*    S° 01sch/sho ; Cp 01sch/sho


ClO-
*     formula= Cl(1)
      charge=  -1.0      ion size=  3.6 A      mole wt.=  51.4520 g
      2 species in reaction
      0.5000 O2(aq)           1.0000 Cl-           
      16.1652    15.0883    13.9127    12.8880
      11.9268    11.2078    10.6588    10.2399
*    References DGf or LogK 97asho/sas ; DHf n/a
*    S° 97asho/sas ; Cp 97asho/sas


ClO2(aq)
*     formula= Cl(4)
      charge=  0.0      ion size=  3.4 A      mole wt.=  67.4510 g
      4 species in reaction
      1.2500 O2(aq)           1.0000 Cl-           1.0000 H+
      -0.5000 H2O           
      21.5092    19.6285    17.5713    15.7430
      13.9549    12.5164    11.2810    10.1155
*    References DGf or LogK 01sch/sho ; DHf n/a
*    S° 01sch/sho ; Cp 01sch/sho


ClO2-
*     formula= Cl(3)
      charge=  -1.0      ion size=  4.2 A      mole wt.=  67.4510 g
      2 species in reaction
      1.0000 O2(aq)           1.0000 Cl-           
      24.9462    23.0945    21.0742    19.3217
      17.6901    16.4810    15.5662    14.8744
*    References DGf or LogK 97asho/sas ; DHf n/a
*    S° 97asho/sas ; Cp 97asho/sas


ClO3-
*     formula= Cl(5)
      charge=  -1.0      ion size=  3.5 A      mole wt.=  83.4510 g
      2 species in reaction
      1.5000 O2(aq)           1.0000 Cl-           
      18.6150    17.2469    15.8301    14.6748
      13.6799    13.0128    12.5665    12.2857
*    References DGf or LogK 97asho/sas ; DHf n/a
*    S° 97asho/sas ; Cp 97asho/sas


ClO4-
*     formula= Cl(7)
      charge=  -1.0      ion size=  3.5 A      mole wt.=  99.4500 g
      2 species in reaction
      2.0000 O2(aq)           1.0000 Cl-           
      16.7856    15.6947    14.6456    13.8674
      13.2848    12.9772    12.8504    12.8626
*    References DGf or LogK 97asho/sas ; DHf n/a
*    S° 89cox/wag ; Cp 97asho/sas


CN-
*     formula= N(-5)
      charge=  -1.0      ion size=  3.0 A      mole wt.=  26.0170 g
      4 species in reaction
      1.0000 HCO3-           1.0000 NH3(aq)           -0.5000 O2(aq)
      -2.0000 H2O           
      61.5303    56.0463    49.6614    43.7536
      37.8614    33.1493    29.2855    26.0500
*    References DGf or LogK 97asho/sas ; DHf n/a
*    S° 97asho/sas ; Cp 97asho/sas


CO(aq)
*     formula= C(2)
      charge=  0.0      ion size=  3.4 A      mole wt.=  28.0100 g
      4 species in reaction
      1.0000 HCO3-           1.0000 H+           -0.5000 O2(aq)
      -1.0000 H2O           
      46.0469    41.7169    36.4765    31.4305
      26.1684    21.7363    17.8733    14.3388
*    References DGf or LogK n/a ; DHf 93sho/mck, 01sch/sho
*    S° 82wag/eva ; Cp 93sho/mck, 01sch/sho


Cr++
*     formula= Cr(2)
      charge=  2.0      ion size=  5.7 A      mole wt.=  51.9660 g
      4 species in reaction
      1.0000 CrO4--           4.0000 H+           -1.0000 O2(aq)
      -2.0000 H2O           
      20.8181    18.7497    16.0409    13.2286
      10.0679    7.1985    4.5032    1.8001
*    References DGf or LogK n/a ; DHf 04chi
*    S° 97asho/sas ; Cp 97asho/sas


Cr+++
*     formula= Cr(3)
      charge=  3.0      ion size=  9.0 A      mole wt.=  51.9660 g
      4 species in reaction
      1.0000 CrO4--           5.0000 H+           -0.7500 O2(aq)
      -2.5000 H2O           
      -10.6110    -9.1277    -7.7149    -6.7183
      -6.0690    -5.8624    -5.9899    -6.4855
*    References DGf or LogK n/a ; DHf 04chi
*    S° 97asho/sas ; Cp 97asho/sas


Cu+
*     formula= Cu(1)
      charge=  1.0      ion size=  4.1 A      mole wt.=  63.5460 g
      4 species in reaction
      1.0000 Cu++           0.5000 H2O           -0.2500 O2(aq)
      -1.0000 H+           
      20.9742    18.6649    15.9681    13.4634
      10.9445    8.8969    7.1705    5.6592
*    References DGf or LogK 95bev/pui ; DHf n/a
*    S° 00pui ; Cp 97asho/sas


Dy++
*     formula= Dy(2)
      charge=  2.0      ion size=  5.7 A      mole wt.=  162.5000 g
      4 species in reaction
      1.0000 Dy+++           0.5000 H2O           -0.2500 O2(aq)
      -1.0000 H+           
      69.1616    62.4725    54.7383    47.6207
      40.5452    34.8868    30.2244    26.2789
*    References DGf or LogK 97asho/sas ; DHf n/a
*    S° 97asho/sas ; Cp 97asho/sas


Dy++++
*     formula= Dy(4)
      charge=  4.0      ion size=  11.6 A      mole wt.=  162.5000 g
      4 species in reaction
      0.2500 O2(aq)           1.0000 Dy+++           1.0000 H+
      -0.5000 H2O           
      57.9782    54.0013    49.3751    45.1014
      40.8607    37.5082    34.8150    32.6282
*    References DGf or LogK 97asho/sas ; DHf n/a
*    S° 97asho/sas ; Cp 97asho/sas


Er++
*     formula= Er(2)
      charge=  2.0      ion size=  5.7 A      mole wt.=  167.2600 g
      4 species in reaction
      1.0000 Er+++           0.5000 H2O           -0.2500 O2(aq)
      -1.0000 H+           
      79.1039    71.5617    62.8416    54.8179
      46.8445    40.4730    35.2303    30.8034
*    References DGf or LogK 97asho/sas ; DHf n/a
*    S° 97asho/sas ; Cp 97asho/sas


Er++++
*     formula= Er(4)
      charge=  4.0      ion size=  11.6 A      mole wt.=  167.2600 g
      4 species in reaction
      0.2500 O2(aq)           1.0000 Er+++           1.0000 H+
      -0.5000 H2O           
      81.0665    75.1117    68.2099    61.8535
      55.5579    50.5804    46.5693    43.2917
*    References DGf or LogK 97asho/sas ; DHf n/a
*    S° 97asho/sas ; Cp 97asho/sas


Eu++
*     formula= Eu(2)
      charge=  2.0      ion size=  5.7 A      mole wt.=  151.9640 g
      4 species in reaction
      1.0000 Eu+++           0.5000 H2O           -0.2500 O2(aq)
      -1.0000 H+           
      30.8927    27.4351    23.3992    19.6494
      15.8791    12.8204    10.2558    8.0378
*    References DGf or LogK 97asho/sas ; DHf n/a
*    S° 97asho/sas ; Cp 97asho/sas


Eu++++
*     formula= Eu(4)
      charge=  4.0      ion size=  11.6 A      mole wt.=  151.9640 g
      4 species in reaction
      0.2500 O2(aq)           1.0000 Eu+++           1.0000 H+
      -0.5000 H2O           
      89.3866    82.8083    75.1841    68.1626
      61.2078    55.7075    51.2721    47.6431
*    References DGf or LogK 97asho/sas ; DHf n/a
*    S° 97asho/sas ; Cp 97asho/sas


Fe+++
*     formula= Fe(3)
      charge=  3.0      ion size=  9.0 A      mole wt.=  55.8470 g
      4 species in reaction
      0.2500 O2(aq)           1.0000 Fe++           1.0000 H+
      -0.5000 H2O           
      -10.0610    -8.4898    -6.6525    -4.9403
      -3.2070    -1.7819    -0.5617    0.5249
*    References DGf or LogK 95par/kho ; DHf 95par/kho
*    S° n/a ; Cp 88sho/hel,89bsho/hel,97asho/sas


Gd++
*     formula= Gd(2)
      charge=  2.0      ion size=  5.7 A      mole wt.=  157.2500 g
      4 species in reaction
      1.0000 Gd+++           0.5000 H2O           -0.2500 O2(aq)
      -1.0000 H+           
      95.1149    86.3763    76.2796    66.9962
      57.7811    50.4296    44.3940    39.3119
*    References DGf or LogK 97asho/sas ; DHf n/a
*    S° 97asho/sas ; Cp 97asho/sas


Gd++++
*     formula= Gd(4)
      charge=  4.0      ion size=  11.6 A      mole wt.=  157.2500 g
      4 species in reaction
      0.2500 O2(aq)           1.0000 Gd+++           1.0000 H+
      -0.5000 H2O           
      112.7579    104.3665    94.6658    85.7529
      76.9419    69.9829    64.3719    59.7754
*    References DGf or LogK 97asho/sas ; DHf n/a
*    S° 97asho/sas ; Cp 97asho/sas


H2(aq)
*     formula= H(0)
      charge=  0.0      ion size=  3.4 A      mole wt.=  2.0160 g
      2 species in reaction
      1.0000 H2O           -0.5000 O2(aq)           
      50.4434    46.0717    40.9399    36.1421
      31.2969    27.3648    24.0853    21.2680
*    References DGf or LogK 82wag/eva ; DHf n/a
*    S° 82wag/eva ; Cp 89bsho/hel, 01sch/sho


H2AsO3-
*     formula= As(3)
      charge=  -1.0      ion size=  3.6 A      mole wt.=  124.9360 g
      2 species in reaction
      1.0000 H2AsO4-           -0.5000 O2(aq)           
      33.6126    30.5651    26.8990    23.3927
      19.7692    16.7575    14.1859    11.9220
*    References DGf or LogK 05bes/app ; DHf n/a
*    S° 05bes/app ; Cp 05bes/app


H2PO2-
*     formula= P(2)
      charge=  -1.0      ion size=  3.6 A      mole wt.=  64.9880 g
      2 species in reaction
      1.0000 H2PO4-           -1.0000 O2(aq)           
      123.1941    112.3992    99.8801    88.3248
      76.8179    67.6237    60.0842    53.7553
*    References DGf or LogK 97asho/sas ; DHf n/a
*    S° 97asho/sas ; Cp 97asho/sas


H2PO3-
*     formula= P(3)
      charge=  -1.0      ion size=  3.6 A      mole wt.=  80.9880 g
      2 species in reaction
      1.0000 H2PO4-           -0.5000 O2(aq)           
      57.5508    52.3462    46.2795    40.6518
      35.0164    30.4849    26.7422    23.5719
*    References DGf or LogK 97asho/sas ; DHf n/a
*    S° 97asho/sas ; Cp 97asho/sas


Hg(aq)
*     formula= Hg(0)
      charge=  0.0      ion size=  3.4 A      mole wt.=  200.5900 g
      4 species in reaction
      1.0000 Hg++           1.0000 H2O           -0.5000 O2(aq)
      -2.0000 H+           
      22.5035    20.6497    18.2812    15.9024
      13.3269    11.0816    9.0683    7.1959
*    References DGf or LogK 05bes/app ; DHf n/a
*    S° 05bes/app ; Cp 05bes/app


Hg2++
*     formula= Hg(1)
      charge=  2.0      ion size=  5.7 A      mole wt.=  401.1800 g
      4 species in reaction
      2.0000 Hg++           1.0000 H2O           -0.5000 O2(aq)
      -2.0000 H+           
      13.8857    12.2025    10.2286    8.3943
      6.5479    5.0366    3.7391    2.5567
*    References DGf or LogK n/a ; DHf 89cox/wag
*    S° 89cox/wag ; Cp 97asho/sas


Ho++
*     formula= Ho(2)
      charge=  2.0      ion size=  5.7 A      mole wt.=  164.9300 g
      4 species in reaction
      1.0000 Ho+++           0.5000 H2O           -0.2500 O2(aq)
      -1.0000 H+           
      76.0087    68.7763    60.4145    52.7204
      45.0739    38.9622    33.9309    29.6791
*    References DGf or LogK 97asho/sas ; DHf n/a
*    S° 97asho/sas ; Cp 97asho/sas


Ho++++
*     formula= Ho(4)
      charge=  4.0      ion size=  11.6 A      mole wt.=  164.9300 g
      4 species in reaction
      0.2500 O2(aq)           1.0000 H+           1.0000 Ho+++
      -0.5000 H2O           
      80.2772    74.4520    67.7008    61.4836
      55.3267    50.4603    46.5402    43.3388
*    References DGf or LogK 97asho/sas ; DHf n/a
*    S° 97asho/sas ; Cp 97asho/sas


HS-
*     formula= S(-2)
      charge=  -1.0      ion size=  3.5 A      mole wt.=  33.0740 g
      3 species in reaction
      1.0000 H+           1.0000 SO4--           -2.0000 O2(aq)           
      152.0702    138.2864    122.1164    107.0210
      91.7946    79.4356    69.0967    60.1451
*    References DGf or LogK 89cox/wag ; DHf n/a
*    S° 89cox/wag ; Cp 97asho/sas


HSe-
*     formula= Se(-2)
      charge=  -1.0      ion size=  3.6 A      mole wt.=  79.9680 g
      3 species in reaction
      1.0000 H+           1.0000 SeO3--           -1.5000 O2(aq)           
      84.8569    76.8426    67.3589    58.4202
      49.3015    41.7987    35.4194    29.7688
*    References DGf or LogK 97asho/sas ; DHf n/a
*    S° 97asho/sas ; Cp 97asho/sas


HSO5-
*     formula= S(8)
      charge=  -1.0      ion size=  3.6 A      mole wt.=  113.0710 g
      3 species in reaction
      0.5000 O2(aq)           1.0000 H+           1.0000 SO4--           
      19.3760    17.2063    14.5524    11.9790
      9.2688    6.9453    4.8575    2.8471
*    References DGf or LogK 97asho/sas ; DHf n/a
*    S° 97asho/sas ; Cp 97asho/sas


I3-
*     formula= I(-0.3)
      charge=  -1.0      ion size=  3.6 A      mole wt.=  380.7130 g
      4 species in reaction
      0.5000 O2(aq)           2.0000 H+           3.0000 I-
      -1.0000 H2O           
      -27.3739    -24.7218    -21.8734    -19.4886
      -17.4234    -16.0997    -15.3763    -15.2690
*    References DGf or LogK 88sho/hel ; DHf n/a
*    S° 88sho/hel ; Cp 88sho/hel


IO-
*     formula= I(1)
      charge=  -1.0      ion size=  3.6 A      mole wt.=  142.9040 g
      2 species in reaction
      0.5000 O2(aq)           1.0000 I-           
      0.2221    0.9033    1.7635    2.6143
      3.5177    4.2889    4.9652    5.5800
*    References DGf or LogK 97asho/sas ; DHf n/a
*    S° 97asho/sas ; Cp 97asho/sas


IO3-
*     formula= I(5)
      charge=  -1.0      ion size=  4.2 A      mole wt.=  174.9030 g
      2 species in reaction
      1.5000 O2(aq)           1.0000 I-           
      -19.9554    -17.6821    -14.9077    -12.2255
      -9.4312    -7.0953    -5.0952    -3.3317
*    References DGf or LogK 97asho/sas ; DHf n/a
*    S° 97asho/sas ; Cp 97asho/sas


IO4-
*     formula= I(7)
      charge=  -1.0      ion size=  3.5 A      mole wt.=  190.9020 g
      2 species in reaction
      2.0000 O2(aq)           1.0000 I-           
      -8.0094    -6.9638    -5.5667    -4.1112
      -2.4929    -1.0617    0.2189    1.3882
*    References DGf or LogK 97asho/sas ; DHf n/a
*    S° 97asho/sas ; Cp 97asho/sas


La++
*     formula= La(2)
      charge=  2.0      ion size=  5.7 A      mole wt.=  138.9060 g
      4 species in reaction
      1.0000 La+++           0.5000 H2O           -0.2500 O2(aq)
      -1.0000 H+           
      93.5015    84.7558    74.6497    65.3574
      56.1343    48.7783    42.7415    37.6593
*    References DGf or LogK 97asho/sas ; DHf n/a
*    S° 97asho/sas ; Cp 97asho/sas


Lu++++
*     formula= Lu(4)
      charge=  4.0      ion size=  11.6 A      mole wt.=  174.9670 g
      4 species in reaction
      0.2500 O2(aq)           1.0000 H+           1.0000 Lu+++
      -0.5000 H2O           
      124.7838    115.1336    103.9956    93.7761
      83.6843    75.7177    69.2926    64.0249
*    References DGf or LogK 97asho/sas ; DHf n/a
*    S° 97asho/sas ; Cp 97asho/sas


Mn+++
*     formula= Mn(3)
      charge=  3.0      ion size=  8.2 A      mole wt.=  54.9380 g
      4 species in reaction
      0.2500 O2(aq)           1.0000 H+           1.0000 Mn++
      -0.5000 H2O           
      3.2834    4.0107    4.9039    5.7767
      6.7094    7.5258    8.2729    8.9828
*    References DGf or LogK 97asho/sas ; DHf n/a
*    S° 97asho/sas ; Cp 97asho/sas


MnO4-
*     formula= Mn(7)
      charge=  -1.0      ion size=  3.5 A      mole wt.=  118.9360 g
      4 species in reaction
      1.2500 O2(aq)           1.0000 Mn++           1.5000 H2O
      -3.0000 H+           
      22.2520    20.2124    18.0889    16.3680
      14.9144    13.9778    13.4021    13.1322
*    References DGf or LogK 97asho/sas ; DHf n/a
*    S° 97asho/sas ; Cp 97asho/sas


MnO4--
*     formula= Mn(6)
      charge=  -2.0      ion size=  4.7 A      mole wt.=  118.9360 g
      4 species in reaction
      1.0000 O2(aq)           1.0000 Mn++           2.0000 H2O
      -4.0000 H+           
      34.8742    32.3278    29.7556    27.7599
      26.2037    25.3652    25.0705    25.3117
*    References DGf or LogK 97asho/sas ; DHf n/a
*    S° 97asho/sas ; Cp 97asho/sas


N2(aq)
*     formula= N(0)
      charge=  0.0      ion size=  3.4 A      mole wt.=  28.0130 g
      3 species in reaction
      1.5000 O2(aq)           2.0000 NH3(aq)           -3.0000 H2O           
      -127.4519    -116.4428    -103.7947    -92.2059
      -80.7409    -71.6384    -64.2188    -58.0273
*    References DGf or LogK 89bsho/hel, 01sch/sho ; DHf n/a
*    S° 89bsho/hel, 01sch/sho ; Cp 89bsho/hel, 01sch/sho


Nd++
*     formula= Nd(2)
      charge=  2.0      ion size=  5.7 A      mole wt.=  144.2400 g
      4 species in reaction
      1.0000 Nd+++           0.5000 H2O           -0.2500 O2(aq)
      -1.0000 H+           
      72.6992    65.7710    57.7372    50.3240
      42.9360    37.0142    32.1265    27.9844
*    References DGf or LogK 97asho/sas ; DHf n/a
*    S° 97asho/sas ; Cp 97asho/sas


Nd++++
*     formula= Nd(4)
      charge=  4.0      ion size=  11.6 A      mole wt.=  144.2400 g
      4 species in reaction
      0.2500 O2(aq)           1.0000 H+           1.0000 Nd+++
      -0.5000 H2O           
      66.4382    61.7711    56.3225    51.2712
      46.2383    42.2398    39.0082    36.3651
*    References DGf or LogK 97asho/sas ; DHf n/a
*    S° 97asho/sas ; Cp 97asho/sas


NO2-
*     formula= N(3)
      charge=  -1.0      ion size=  3.0 A      mole wt.=  46.0060 g
      4 species in reaction
      1.5000 O2(aq)           1.0000 NH3(aq)           -1.0000 H+
      -1.0000 H2O           
      -51.4265    -46.8601    -41.3808    -36.1353
      -30.6898    -26.1222    -22.1562    -18.5402
*    References DGf or LogK 97asho/sas ; DHf n/a
*    S° 97asho/sas ; Cp 97asho/sas


NO3-
*     formula= N(5)
      charge=  -1.0      ion size=  3.0 A      mole wt.=  62.0050 g
      4 species in reaction
      2.0000 O2(aq)           1.0000 NH3(aq)           -1.0000 H+
      -1.0000 H2O           
      -68.1821    -62.0952    -54.8229    -47.8948
      -40.7451    -34.7919    -29.6706    -25.0674
*    References DGf or LogK 97asho/sas ; DHf n/a
*    S° 97asho/sas ; Cp 97asho/sas


PH3(aq)
*     formula= P(-3)
      charge=  0.0      ion size=  3.4 A      mole wt.=  33.9980 g
      3 species in reaction
      1.0000 H+           1.0000 H2PO4-           -2.0000 O2(aq)           
      229.6175    209.4597    185.9358    164.0828
      142.1563    124.4701    109.7851    97.2043
*    References DGf or LogK 01sch/sho ; DHf n/a
*    S° 01sch/sho ; Cp 01sch/sho


Pm++
*     formula= Pm(2)
      charge=  2.0      ion size=  5.7 A      mole wt.=  144.9130 g
      4 species in reaction
      0.5000 H2O           1.0000 Pm+++           -0.2500 O2(aq)
      -1.0000 H+           
      76.6000    69.3627    60.9702    53.2258
      45.5071    39.3198    34.2130    29.8868
*    References DGf or LogK 97asho/sas ; DHf n/a
*    S° 97asho/sas ; Cp 97asho/sas


Pm++++
*     formula= Pm(4)
      charge=  4.0      ion size=  11.6 A      mole wt.=  144.9130 g
      4 species in reaction
      0.2500 O2(aq)           1.0000 H+           1.0000 Pm+++
      -0.5000 H2O           
      74.5881    69.2477    63.0238    57.2620
      51.5264    46.9696    43.2826    40.2601
*    References DGf or LogK 97asho/sas ; DHf n/a
*    S° 97asho/sas ; Cp 97asho/sas


Pr++
*     formula= Pr(2)
      charge=  2.0      ion size=  5.7 A      mole wt.=  140.9080 g
      4 species in reaction
      0.5000 H2O           1.0000 Pr+++           -0.2500 O2(aq)
      -1.0000 H+           
      80.3370    72.7345    63.9335    55.8252
      47.7574    41.3015    35.9817    31.4823
*    References DGf or LogK 97asho/sas ; DHf n/a
*    S° 97asho/sas ; Cp 97asho/sas


Pr++++
*     formula= Pr(4)
      charge=  4.0      ion size=  11.6 A      mole wt.=  140.9080 g
      4 species in reaction
      0.2500 O2(aq)           1.0000 H+           1.0000 Pr+++
      -0.5000 H2O           
      47.4928    44.3990    40.7624    37.3708
      33.9752    31.2700    29.0849    27.3058
*    References DGf or LogK 97asho/sas ; DHf n/a
*    S° 97asho/sas ; Cp 97asho/sas


Rh+++
*     formula= Rh(3)
      charge=  3.0      ion size=  8.2 A      mole wt.=  102.9060 g
      4 species in reaction
      0.2500 O2(aq)           1.0000 H+           1.0000 Rh++
      -0.5000 H2O           
      -4.4720    -3.3560    -2.0180    -0.7409
      0.5865    1.7100    2.7014    3.6101
*    References DGf or LogK 97asho/sas,98sas/sho ; DHf n/a
*    S° 97asho/sas,98sas/sho ; Cp 97asho/sas,98sas/sho


Ru++
*     formula= Ru(2)
      charge=  2.0      ion size=  5.7 A      mole wt.=  101.0700 g
      4 species in reaction
      4.0000 H+           1.0000 RuO4--           -1.0000 O2(aq)
      -2.0000 H2O           
      -1.1179    -1.3952    -2.0116    -2.8812
      -4.0989    -5.4118    -6.8324    -8.4738
*    References DGf or LogK 98sas/sho ; DHf n/a
*    S° 98sas/sho ; Cp 98sas/sho


Ru+++
*     formula= Ru(3)
      charge=  3.0      ion size=  8.2 A      mole wt.=  101.0700 g
      4 species in reaction
      5.0000 H+           1.0000 RuO4--           -0.7500 O2(aq)
      -2.5000 H2O           
      -20.9802    -18.8321    -16.6230    -14.8707
      -13.4515    -12.6194    -12.2308    -12.2949
*    References DGf or LogK 98sas/sho ; DHf n/a
*    S° 98sas/sho ; Cp 98sas/sho


S2O3--
*     formula= S(2)
      charge=  -2.0      ion size=  4.7 A      mole wt.=  112.1300 g
      4 species in reaction
      2.0000 H+           2.0000 SO4--           -2.0000 O2(aq)
      -1.0000 H2O           
      146.9519    133.4123    117.4171    102.3768
      87.0746    74.5151    63.8518    54.4011
*    References DGf or LogK 06bla/pia ; DHf n/a
*    S° 97asho/sas ; Cp 97asho/sas


S2O4--
*     formula= S(3)
      charge=  -2.0      ion size=  5.0 A      mole wt.=  128.1300 g
      4 species in reaction
      2.0000 H+           2.0000 SO4--           -1.5000 O2(aq)
      -1.0000 H2O           
      130.3141    118.2805    104.0616    90.6899
      77.0795    65.8970    56.3823    47.9146
*    References DGf or LogK 06bla/pia ; DHf n/a
*    S° 97asho/sas ; Cp 97asho/sas


S2O6--
*     formula= S(5)
      charge=  -2.0      ion size=  4.7 A      mole wt.=  160.1280 g
      4 species in reaction
      2.0000 H+           2.0000 SO4--           -0.5000 O2(aq)
      -1.0000 H2O           
      56.3693    50.8220    44.1659    37.8130
      31.2322    25.6994    20.8435    16.3101
*    References DGf or LogK 06bla/pia ; DHf n/a
*    S° 97asho/sas ; Cp 97asho/sas


S2O8--
*     formula= S(7)
      charge=  -2.0      ion size=  4.7 A      mole wt.=  192.1270 g
      4 species in reaction
      0.5000 O2(aq)           2.0000 H+           2.0000 SO4--
      -1.0000 H2O           
      25.4040    22.3789    18.7002    15.1458
      11.4041    8.1807    5.2476    2.3510
*    References DGf or LogK 06bla/pia ; DHf n/a
*    S° 97asho/sas ; Cp 97asho/sas


SeO4--
*     formula= Se(6)
      charge=  -2.0      ion size=  4.7 A      mole wt.=  142.9580 g
      2 species in reaction
      0.5000 O2(aq)           1.0000 SeO3--           
      -15.3071    -13.9839    -12.4141    -10.9315
      -9.4196    -8.1822    -7.1438    -6.2483
*    References DGf or LogK 97asho/sas ; DHf n/a
*    S° 97asho/sas ; Cp 97asho/sas


Sm++
*     formula= Sm(2)
      charge=  2.0      ion size=  5.7 A      mole wt.=  150.3600 g
      4 species in reaction
      0.5000 H2O           1.0000 Sm+++           -0.2500 O2(aq)
      -1.0000 H+           
      53.1658    47.9591    41.8984    36.2849
      30.6661    26.1390    22.3799    19.1711
*    References DGf or LogK 97asho/sas ; DHf n/a
*    S° 97asho/sas ; Cp 97asho/sas


Sm++++
*     formula= Sm(4)
      charge=  4.0      ion size=  11.6 A      mole wt.=  150.3600 g
      4 species in reaction
      0.2500 O2(aq)           1.0000 H+           1.0000 Sm+++
      -0.5000 H2O           
      70.8953    65.8759    60.0243    54.6062
      49.2137    44.9324    41.4728    38.6416
*    References DGf or LogK 97asho/sas ; DHf n/a
*    S° 97asho/sas ; Cp 97asho/sas


SO3--
*     formula= S(4)
      charge=  -2.0      ion size=  4.5 A      mole wt.=  80.0640 g
      2 species in reaction
      1.0000 SO4--           -0.5000 O2(aq)           
      50.9550    46.6147    41.5764    36.9277
      32.3049    28.6198    25.6066    23.0845
*    References DGf or LogK 06bla/pia ; DHf n/a
*    S° 04chi ; Cp 97asho/sas


Tb++
*     formula= Tb(2)
      charge=  2.0      ion size=  5.7 A      mole wt.=  158.9250 g
      4 species in reaction
      0.5000 H2O           1.0000 Tb+++           -0.2500 O2(aq)
      -1.0000 H+           
      88.5097    80.2111    70.6199    61.7978
      53.0353    46.0379    40.2853    35.4337
*    References DGf or LogK 97asho/sas ; DHf n/a
*    S° 97asho/sas ; Cp 97asho/sas


Tb++++
*     formula= Tb(4)
      charge=  4.0      ion size=  11.6 A      mole wt.=  158.9250 g
      4 species in reaction
      0.2500 O2(aq)           1.0000 H+           1.0000 Tb+++
      -0.5000 H2O           
      32.5833    30.7652    28.6073    26.5789
      24.5386    22.9134    21.6107    20.5664
*    References DGf or LogK 97asho/sas ; DHf n/a
*    S° 97asho/sas ; Cp 97asho/sas


Tl+++
*     formula= Tl(3)
      charge=  3.0      ion size=  8.2 A      mole wt.=  204.3830 g
      4 species in reaction
      0.5000 O2(aq)           2.0000 H+           1.0000 Tl+
      -1.0000 H2O           
      -1.1357    0.2808    1.9164    3.4261
      4.9523    6.2245    7.3540    8.4323
*    References DGf or LogK 97asho/sas ; DHf n/a
*    S° 97asho/sas ; Cp 97asho/sas


Tm++
*     formula= Tm(2)
      charge=  2.0      ion size=  5.7 A      mole wt.=  168.9340 g
      4 species in reaction
      0.5000 H2O           1.0000 Tm+++           -0.2500 O2(aq)
      -1.0000 H+           
      66.2741    59.8337    52.3775    45.5073
      38.6683    33.1908    28.6705    24.8398
*    References DGf or LogK 97asho/sas ; DHf n/a
*    S° 97asho/sas ; Cp 97asho/sas


Tm++++
*     formula= Tm(4)
      charge=  4.0      ion size=  11.6 A      mole wt.=  168.9340 g
      4 species in reaction
      0.2500 O2(aq)           1.0000 H+           1.0000 Tm+++
      -0.5000 H2O           
      79.4445    73.6457    66.9234    60.7312
      54.5976    49.7480    45.8401    42.6475
*    References DGf or LogK 97asho/sas ; DHf n/a
*    S° 97asho/sas ; Cp 97asho/sas


U+++
*     formula= U(3)
      charge=  3.0      ion size=  8.2 A      mole wt.=  238.0290 g
      4 species in reaction
      1.0000 H+           1.0000 UO2++           -0.7500 O2(aq)
      -0.5000 H2O           
      71.1157    65.0588    58.0922    51.7068
      45.3964    40.4031    36.3595    33.0209
*    References DGf or LogK 97asho/sas ; DHf n/a
*    S° 97asho/sas ; Cp 97asho/sas


U++++
*     formula= U(4)
      charge=  4.0      ion size=  11.6 A      mole wt.=  238.0290 g
      4 species in reaction
      2.0000 H+           1.0000 UO2++           -0.5000 O2(aq)
      -1.0000 H2O           
      36.1036    33.9587    31.4073    28.9924
      26.5425    24.5765    22.9932    21.7174
*    References DGf or LogK 97asho/sas ; DHf n/a
*    S° 97asho/sas ; Cp 97asho/sas


UO2+
*     formula= U(5)
      charge=  1.0      ion size=  4.1 A      mole wt.=  270.0280 g
      4 species in reaction
      0.5000 H2O           1.0000 UO2++           -0.2500 O2(aq)
      -1.0000 H+           
      22.1973    20.0244    17.5917    15.4185
      13.3182    11.6797    10.3499    9.2227
*    References DGf or LogK 97asho/sas ; DHf n/a
*    S° 97asho/sas ; Cp 97asho/sas


V++
*     formula= V(2)
      charge=  2.0      ion size=  5.7 A      mole wt.=  50.9420 g
      2 species in reaction
      1.0000 VO++           -0.5000 O2(aq)           
      45.6425    41.5447    36.8742    32.6341
      28.4835    25.2249    22.5965    20.4227
*    References DGf or LogK 97asho/sas ; DHf n/a
*    S° 97asho/sas ; Cp 97asho/sas


V+++
*     formula= V(3)
      charge=  3.0      ion size=  8.2 A      mole wt.=  50.9420 g
      4 species in reaction
      1.0000 H+           1.0000 VO++           -0.2500 O2(aq)
      -0.5000 H2O           
      17.0154    15.7223    14.2751    12.9846
      11.7532    10.8251    10.1234    9.6000
*    References DGf or LogK 97asho/sas ; DHf n/a
*    S° 97asho/sas ; Cp 97asho/sas


VO2+
*     formula= V(5)
      charge=  1.0      ion size=  4.1 A      mole wt.=  82.9400 g
      4 species in reaction
      0.2500 O2(aq)           0.5000 H2O           1.0000 VO++
      -1.0000 H+           
      -4.7927    -4.5806    -4.1795    -3.6702
      -3.0260    -2.4090    -1.8375    -1.3204
*    References DGf or LogK 97asho/sas ; DHf n/a
*    S° 97asho/sas ; Cp 97asho/sas


Yb++
*     formula= Yb(2)
      charge=  2.0      ion size=  5.7 A      mole wt.=  173.0400 g
      4 species in reaction
      0.5000 H2O           1.0000 Yb+++           -0.2500 O2(aq)
      -1.0000 H+           
      43.7563    39.2983    34.1109    29.3067
      24.4960    20.6149    17.3845    14.6184
*    References DGf or LogK 97asho/sas ; DHf n/a
*    S° 97asho/sas ; Cp 97asho/sas


Yb++++
*     formula= Yb(4)
      charge=  4.0      ion size=  11.6 A      mole wt.=  173.0400 g
      4 species in reaction
      0.2500 O2(aq)           1.0000 H+           1.0000 Yb+++
      -0.5000 H2O           
      100.8427    93.2787    84.5261    76.4763
      68.5109    62.2135    57.1325    52.9696
*    References DGf or LogK 97asho/sas ; DHf n/a
*    S° 97asho/sas ; Cp 97asho/sas


-end-

 861 aqueous species

(CH3Hg)2OH+
*     formula= C2H6Hg2OH+
      charge=  1.0      ion size=  4.1 A      mole wt.=  448.2560 g
      4 species in reaction
      2.0000 CH4(aq)           1.0000 H2O           2.0000 Hg++
      -3.0000 H+           
      -4.5319    -3.8490    -2.7284    -1.3673
      0.3300    1.9520    3.4598    4.8361
*    References DGf or LogK 18bla/bur ; DHf n/a
*    S° 03ald/gan ; Cp n/a


Ag(CO3)-
*     formula= Ag(CO3)(-)
      charge=  -1.0      ion size=  3.6 A      mole wt.=  167.8770 g
      3 species in reaction
      1.0000 Ag+           1.0000 HCO3-           -1.0000 H+           
      7.5073    7.6250    7.7816    7.9623
      8.1906    8.4186    8.6425    8.8576
*    References DGf or LogK 97sve/sho ; DHf n/a
*    S° 97sve/sho ; Cp 97sve/sho


Ag(CO3)2---
*     formula= Ag(CO3)2(-3)
      charge=  -3.0      ion size=  6.7 A      mole wt.=  227.8860 g
      3 species in reaction
      1.0000 Ag+           2.0000 HCO3-           -2.0000 H+           
      18.5022    18.4729    18.4789    18.5605
      18.7655    19.0799    19.5183    20.1382
*    References DGf or LogK 97sve/sho ; DHf n/a
*    S° 97sve/sho ; Cp 97sve/sho


Ag(HS)2-
*     formula= Ag(HS)2(-1)
      charge=  -1.0      ion size=  4.5 A      mole wt.=  174.0160 g
      2 species in reaction
      1.0000 Ag+           2.0000 HS-           
      -19.2474    -17.5864    -15.7687    -14.1855
      -12.7284    -11.7070    -11.0574    -10.8153
*    References DGf or LogK 01aki/zot ; DHf n/a
*    S° 01aki/zot ; Cp 01aki/zot


Ag(OH)2-
*     formula= Ag(OH)2(-1)
      charge=  -1.0      ion size=  3.6 A      mole wt.=  141.8830 g
      3 species in reaction
      1.0000 Ag+           2.0000 H2O           -2.0000 H+           
      25.7768    24.2114    22.5670    21.2376
      20.1387    19.4756    19.1373    19.0953
*    References DGf or LogK 01aki/zot ; DHf n/a
*    S° 01aki/zot ; Cp 01aki/zot


AgCl(aq)
*     formula= AgCl(0)
      charge=  0.0      ion size=  3.4 A      mole wt.=  143.3200 g
      2 species in reaction
      1.0000 Ag+           1.0000 Cl-           
      -3.5668    -3.2722    -2.9682    -2.7240
      -2.5355    -2.4615    -2.5129    -2.7510
*    References DGf or LogK 01aki/zot ; DHf n/a
*    S° 01aki/zot ; Cp 01aki/zot


AgCl2-
*     formula= AgCl2(-)
      charge=  -1.0      ion size=  3.6 A      mole wt.=  178.7730 g
      2 species in reaction
      1.0000 Ag+           2.0000 Cl-           
      -5.5722    -5.1699    -4.7862    -4.5160
      -4.3629    -4.3835    -4.5882    -5.0594
*    References DGf or LogK 01aki/zot, d'apres 97tag/zot ; DHf n/a
*    S° 01aki/zot, d'apres 97tag/zot ; Cp 01aki/zot, d'apres 97tag/zot


AgCl3--
*     formula= AgCl3(-2)
      charge=  -2.0      ion size=  4.7 A      mole wt.=  214.2250 g
      2 species in reaction
      1.0000 Ag+           3.0000 Cl-           
      -6.0019    -5.1685    -4.4174    -3.9215
      -3.6519    -3.6576    -3.8929    -4.3896
*    References DGf or LogK 97sve/sho ; DHf n/a
*    S° 97sve/sho ; Cp 97sve/sho


AgCl4---
*     formula= AgCl4(-3)
      charge=  -3.0      ion size=  6.7 A      mole wt.=  249.6780 g
      2 species in reaction
      1.0000 Ag+           4.0000 Cl-           
      -5.0632    -3.8550    -2.7542    -2.0097
      -1.5644    -1.4833    -1.6804    -2.1597
*    References DGf or LogK 97sve/sho ; DHf n/a
*    S° 97sve/sho ; Cp 97sve/sho


AgF(aq)
*     formula= AgF(0)
      charge=  0.0      ion size=  3.4 A      mole wt.=  126.8660 g
      2 species in reaction
      1.0000 Ag+           1.0000 F-           
      -0.4600    -0.4400    -0.4829    -0.5794
      -0.7517    -0.9873    -1.3156    -1.8118
*    References DGf or LogK 97sve/sho ; DHf n/a
*    S° 97sve/sho ; Cp 97sve/sho


AgH2AsO3
*     formula= AgH2AsO3
      charge=  0.0      ion size=  3.4 A      mole wt.=  232.8040 g
      2 species in reaction
      1.0000 Ag+           1.0000 H2AsO3-           
      -1.3927    -1.2197    -0.9593    -0.6546
      -0.2890    0.0360    0.2911    0.4180
*    References DGf or LogK 07mar/acc ; DHf n/a
*    S° 07mar/acc ; Cp 07mar/acc


AgHS(aq)
*     formula= AgHS(0)
      charge=  0.0      ion size=  3.4 A      mole wt.=  140.9420 g
      2 species in reaction
      1.0000 Ag+           1.0000 HS-           
      -14.8146    -13.6061    -12.2539    -11.0475
      -9.9031    -9.0657    -8.4915    -8.2053
*    References DGf or LogK 01aki/zot ; DHf n/a
*    S° 01aki/zot ; Cp 01aki/zot


AgNO3(aq)
*     formula= AgNO3(0)
      charge=  0.0      ion size=  3.4 A      mole wt.=  169.8730 g
      2 species in reaction
      1.0000 Ag+           1.0000 NO3-           
      0.1598    0.2507    0.2666    0.2123
      0.0816    -0.1084    -0.3739    -0.7770
*    References DGf or LogK 97sve/sho ; DHf n/a
*    S° 97sve/sho ; Cp 97sve/sho


AgO-
*     formula= AgO(-1)
      charge=  -1.0      ion size=  3.6 A      mole wt.=  123.8670 g
      3 species in reaction
      1.0000 Ag+           1.0000 H2O           -2.0000 H+           
      25.8481    24.0075    22.0236    20.3538
      18.8852    17.9022    17.2875    17.0108
*    References DGf or LogK 97asho/sas ; DHf n/a
*    S° 97asho/sas ; Cp 97asho/sas


AgOH(aq)
*     formula= AgOH(0)
      charge=  0.0      ion size=  3.4 A      mole wt.=  124.8750 g
      3 species in reaction
      1.0000 Ag+           1.0000 H2O           -1.0000 H+           
      12.7230    11.8990    11.0275    10.3160
      9.7119    9.3168    9.0573    8.8824
*    References DGf or LogK 01aki/zot ; DHf n/a
*    S° 01aki/zot ; Cp 01aki/zot


Al(OH)2+
*     formula= Al(OH)2(+1)
      charge=  1.0      ion size=  4.1 A      mole wt.=  60.9960 g
      3 species in reaction
      1.0000 Al+++           2.0000 H2O           -2.0000 H+           
      12.3479    10.5920    8.5062    6.5257
      4.4726    2.7361    1.2032    -0.2015
*    References DGf or LogK 95pok/hel ; DHf n/a
*    S° 01tag/sch ; Cp 95pok/hel


AlAsO4
*     formula= AlAsO4
      charge=  0.0      ion size=  3.4 A      mole wt.=  165.9010 g
      3 species in reaction
      1.0000 Al+++           1.0000 H2AsO4-           -2.0000 H+           
      9.1460    8.0636    6.8940    5.8701
      4.8559    3.9787    3.1081    2.1077
*    References DGf or LogK 07mar/acc ; DHf n/a
*    S° 07mar/acc ; Cp 07mar/acc


AlF++
*     formula= AlF(2)
      charge=  2.0      ion size=  5.7 A      mole wt.=  45.9800 g
      2 species in reaction
      1.0000 Al+++           1.0000 F-           
      -7.0366    -6.9800    -7.0380    -7.2168
      -7.5581    -8.0138    -8.6001    -9.3789
*    References DGf or LogK 01tag/sch ; DHf n/a
*    S° 01tag/sch ; Cp 01tag/sch


AlF2+
*     formula= AlF2(1)
      charge=  1.0      ion size=  4.1 A      mole wt.=  64.9780 g
      2 species in reaction
      1.0000 Al+++           2.0000 F-           
      -12.5923    -12.5000    -12.6306    -12.9884
      -13.6533    -14.5338    -15.6663    -17.1801
*    References DGf or LogK 01tag/sch ; DHf n/a
*    S° 01tag/sch ; Cp 01tag/sch


AlF3(aq)
*     formula= AlF3(0)
      charge=  0.0      ion size=  3.4 A      mole wt.=  83.9770 g
      2 species in reaction
      1.0000 Al+++           3.0000 F-           
      -16.6823    -16.5500    -16.7371    -17.2498
      -18.2064    -19.4811    -21.1324    -23.3547
*    References DGf or LogK 01tag/sch ; DHf n/a
*    S° 01tag/sch ; Cp 01tag/sch


AlF4-
*     formula= AlF4(-1)
      charge=  -1.0      ion size=  3.6 A      mole wt.=  102.9750 g
      2 species in reaction
      1.0000 Al+++           4.0000 F-           
      -19.0914    -18.9300    -19.1571    -19.7666
      -20.8769    -22.3196    -24.1418    -26.5316
*    References DGf or LogK 01tag/sch ; DHf n/a
*    S° 01tag/sch ; Cp 01tag/sch


AlH2AsO3++
*     formula= AlH2AsO3+2
      charge=  2.0      ion size=  5.7 A      mole wt.=  151.9170 g
      2 species in reaction
      1.0000 Al+++           1.0000 H2AsO3-           
      -7.9146    -7.1638    -6.2470    -5.3450
      -4.3978    -3.6276    -3.0338    -2.6517
*    References DGf or LogK 07mar/acc ; DHf n/a
*    S° 07mar/acc ; Cp 07mar/acc


AlH2AsO4++
*     formula= AlH2AsO4+2
      charge=  2.0      ion size=  5.7 A      mole wt.=  167.9170 g
      2 species in reaction
      1.0000 Al+++           1.0000 H2AsO4-           
      -2.8538    -2.5063    -2.1776    -1.9283
      -1.7477    -1.6923    -1.7729    -2.0467
*    References DGf or LogK 07mar/acc ; DHf n/a
*    S° 07mar/acc ; Cp 07mar/acc


AlH2PO4++
*     formula= AlH2PO4+2
      charge=  2.0      ion size=  5.7 A      mole wt.=  123.9690 g
      2 species in reaction
      1.0000 Al+++           1.0000 H2PO4-           
      -3.0980    -3.0980    -3.0980    -3.0980
      -3.0980    -3.0980    -3.0980    -3.0980
*    References DGf or LogK 79lan ; DHf n/a
*    S° n/a ; Cp n/a


AlH3SiO4++
*     formula= AlH3SiO4(2)
      charge=  2.0      ion size=  5.7 A      mole wt.=  122.0880 g
      3 species in reaction
      1.0000 Al+++           1.0000 H4SiO4(aq)           -1.0000 H+           
      3.6453    2.3800    1.0577    -0.0748
      -1.1577    -2.0273    -2.7861    -3.4948
*    References DGf or LogK 01tag/sch, d'apres 98sal/pok ; DHf n/a
*    S° 01tag/sch, d'apres 98sal/pok ; Cp 01tag/sch, d'apres 98sal/pok


AlHAsO4+
*     formula= AlHAsO4+
      charge=  1.0      ion size=  4.1 A      mole wt.=  166.9090 g
      3 species in reaction
      1.0000 Al+++           1.0000 H2AsO4-           -1.0000 H+           
      0.7018    0.4946    0.3275    0.2385
      0.1906    0.1379    0.0076    -0.3035
*    References DGf or LogK 07mar/acc ; DHf n/a
*    S° 07mar/acc ; Cp 07mar/acc


AlHPO4+
*     formula= AlHPO4+
      charge=  1.0      ion size=  4.1 A      mole wt.=  122.9610 g
      3 species in reaction
      1.0000 Al+++           1.0000 H2PO4-           -1.0000 H+           
      -0.1880    -0.1880    -0.1880    -0.1880
      -0.1880    -0.1880    -0.1880    -0.1880
*    References DGf or LogK 79lan ; DHf n/a
*    S° n/a ; Cp n/a


AlO2-
*     formula= AlO2(-1)
      charge=  -1.0      ion size=  3.6 A      mole wt.=  58.9800 g
      3 species in reaction
      1.0000 Al+++           2.0000 H2O           -4.0000 H+           
      25.7845    22.8720    19.5620    16.5755
      13.6698    11.3999    9.5832    8.1446
*    References DGf or LogK 95pok/hel ; DHf n/a
*    S° 95pok/hel ; Cp 95pok/hel


AlOH++
*     formula= AlOH(+2)
      charge=  2.0      ion size=  5.7 A      mole wt.=  43.9890 g
      3 species in reaction
      1.0000 Al+++           1.0000 H2O           -1.0000 H+           
      5.7210    4.9510    3.9991    3.0600
      2.0484    1.1609    0.3539    -0.4015
*    References DGf or LogK 95pok/hel ; DHf n/a
*    S° 95pok/hel ; Cp 95pok/hel


AlSO4+
*     formula= AlSO4(1)
      charge=  1.0      ion size=  4.1 A      mole wt.=  123.0450 g
      2 species in reaction
      1.0000 Al+++           1.0000 SO4--           
      -3.0632    -3.1700    -3.7511    -4.7035
      -6.1188    -7.7095    -9.5116    -11.7464
*    References DGf or LogK 01tag/sch ; DHf n/a
*    S° 01tag/sch ; Cp 01tag/sch


As(OH)3(aq)
*     formula= As(OH)3(0)
      charge=  0.0      ion size=  3.4 A      mole wt.=  125.9440 g
      2 species in reaction
      1.0000 H2AsO3-           1.0000 H+           
      -9.6750    -9.2555    -8.7153    -8.2082
      -7.7266    -7.3858    -7.1700    -7.0942
*    References DGf or LogK 08per/pok ; DHf n/a
*    S° 08per/pok ; Cp 08per/pok


AsO4---
*     formula= AsO4-3
      charge=  -3.0      ion size=  6.7 A      mole wt.=  138.9190 g
      2 species in reaction
      1.0000 H2AsO4-           -2.0000 H+           
      18.9188    18.4600    18.1908    18.2012
      18.5302    19.1324    20.0052    21.2509
*    References DGf or LogK 76bae/mes ; DHf n/a
*    S° 97asho/sas ; Cp 97asho/sas


Au(HS)2-
*     formula= Au(HS)2(-1)
      charge=  -1.0      ion size=  3.6 A      mole wt.=  263.1140 g
      2 species in reaction
      1.0000 Au+           2.0000 HS-           
      -34.2584    -31.5361    -28.4947    -25.7866
      -23.2105    -21.2910    -19.8933    -18.9972
*    References DGf or LogK 01aki/zot ; DHf n/a
*    S° 01aki/zot ; Cp 01aki/zot


Au(OH)2-
*     formula= Au(OH)2(-1)
      charge=  -1.0      ion size=  3.6 A      mole wt.=  230.9810 g
      3 species in reaction
      1.0000 Au+           2.0000 H2O           -2.0000 H+           
      5.5675    5.7215    6.0569    6.5305
      7.1916    7.8962    8.6383    9.4487
*    References DGf or LogK 01aki/zot ; DHf n/a
*    S° 01aki/zot ; Cp 01aki/zot


AuCl(aq)
*     formula= AuCl(0)
      charge=  0.0      ion size=  3.4 A      mole wt.=  232.4190 g
      2 species in reaction
      1.0000 Au+           1.0000 Cl-           
      -8.4357    -7.9326    -7.3837    -6.9188
      -6.5210    -6.2892    -6.2178    -6.3554
*    References DGf or LogK 01aki/zot ; DHf n/a
*    S° 01aki/zot ; Cp 01aki/zot


AuCl2-
*     formula= AuCl2(-1)
      charge=  -1.0      ion size=  3.6 A      mole wt.=  267.8710 g
      2 species in reaction
      1.0000 Au+           2.0000 Cl-           
      -10.4056    -9.5811    -8.7032    -8.0185
      -7.5222    -7.3337    -7.4141    -7.8034
*    References DGf or LogK 01aki/zot ; DHf n/a
*    S° 01aki/zot ; Cp 01aki/zot


AuCl3--
*     formula= AuCl3(-2)
      charge=  -2.0      ion size=  4.7 A      mole wt.=  303.3240 g
      2 species in reaction
      1.0000 Au+           3.0000 Cl-           
      -10.1349    -9.3276    -8.4982    -7.8443
      -7.3385    -7.0976    -7.0935    -7.3709
*    References DGf or LogK 97sve/sho ; DHf n/a
*    S° 97sve/sho ; Cp 97sve/sho


AuCl4-
*     formula= AuCl4(-1)
      charge=  -1.0      ion size=  3.6 A      mole wt.=  338.7760 g
      2 species in reaction
      1.0000 Au+++           4.0000 Cl-           
      44.9961    41.9128    38.1000    34.3289
      30.2229    26.5253    22.9749    19.2350
*    References DGf or LogK 97sve/sho ; DHf n/a
*    S° 97sve/sho ; Cp 97sve/sho


AuHS(aq)
*     formula= AuHS(0)
      charge=  0.0      ion size=  3.4 A      mole wt.=  230.0400 g
      2 species in reaction
      1.0000 Au+           1.0000 HS-           
      -28.1953    -26.0158    -23.5478    -21.3010
      -19.0970    -17.3871    -16.0738    -15.1462
*    References DGf or LogK 01aki/zot ; DHf n/a
*    S° 01aki/zot ; Cp 01aki/zot


AuOH(aq)
*     formula= AuOH(0)
      charge=  0.0      ion size=  3.4 A      mole wt.=  213.9740 g
      3 species in reaction
      1.0000 Au+           1.0000 H2O           -1.0000 H+           
      -12.2309    -11.0219    -9.5660    -8.1620
      -6.6964    -5.4693    -4.4233    -3.5227
*    References DGf or LogK 01aki/zot ; DHf n/a
*    S° 01aki/zot ; Cp 01aki/zot


B(OH)4-
*     formula= B(OH)4(-1)
      charge=  -1.0      ion size=  3.6 A      mole wt.=  78.8400 g
      3 species in reaction
      1.0000 B(OH)3(aq)           1.0000 H2O           -1.0000 H+           
      9.5143    9.2426    9.0355    8.9365
      8.9370    9.0340    9.2165    9.5143
*    References DGf or LogK 95pok/sch ; DHf n/a
*    S° 95pok/sch ; Cp 95pok/sch


Ba(HCO3)+
*     formula= Ba(HCO3)(+1)
      charge=  1.0      ion size=  4.1 A      mole wt.=  198.3570 g
      2 species in reaction
      1.0000 Ba++           1.0000 HCO3-           
      -0.7620    -1.0340    -1.4740    -2.0022
      -2.6822    -3.3968    -4.1853    -5.1401
*    References DGf or LogK 95sho/kor ; DHf n/a
*    S° 95sho/kor ; Cp 95sho/kor


BaCl+
*     formula= BaCl(+)
      charge=  1.0      ion size=  4.1 A      mole wt.=  172.7920 g
      2 species in reaction
      1.0000 Ba++           1.0000 Cl-           
      0.6502    0.4852    0.1890    -0.1978
      -0.7335    -1.3302    -2.0173    -2.8741
*    References DGf or LogK 97sve/sho ; DHf n/a
*    S° 97sve/sho ; Cp 97sve/sho


BaCO3(aq)
*     formula= BaCO3(0)
      charge=  0.0      ion size=  3.4 A      mole wt.=  197.3490 g
      3 species in reaction
      1.0000 Ba++           1.0000 HCO3-           -1.0000 H+           
      8.1882    7.6667    7.1037    6.6096
      6.1131    5.6676    5.1930    4.5757
*    References DGf or LogK 97sve/sho ; DHf n/a
*    S° 97sve/sho ; Cp 97sve/sho


BaF+
*     formula= BaF(+)
      charge=  1.0      ion size=  4.1 A      mole wt.=  156.3380 g
      2 species in reaction
      1.0000 Ba++           1.0000 F-           
      0.2406    0.1434    -0.0792    -0.3964
      -0.8578    -1.3897    -2.0185    -2.8188
*    References DGf or LogK 97sve/sho ; DHf n/a
*    S° 97sve/sho ; Cp 97sve/sho


BaH2AsO3+
*     formula= BaH2AsO3+
      charge=  1.0      ion size=  4.1 A      mole wt.=  262.2760 g
      2 species in reaction
      1.0000 H2AsO3-           1.0000 Ba++           
      -1.4534    -1.4631    -1.4576    -1.4461
      -1.4520    -1.5071    -1.6489    -1.9507
*    References DGf or LogK 07mar/acc ; DHf n/a
*    S° 07mar/acc ; Cp 07mar/acc


BaOH+
*     formula= BaOH(+)
      charge=  1.0      ion size=  4.1 A      mole wt.=  154.3470 g
      3 species in reaction
      1.0000 Ba++           1.0000 H2O           -1.0000 H+           
      14.9266    13.4940    11.9157    10.5327
      9.2238    8.2220    7.4167    6.7273
*    References DGf or LogK 97asho/sas ; DHf n/a
*    S° 97asho/sas ; Cp 97asho/sas


BeCl+
*     formula= BeCl(1)
      charge=  1.0      ion size=  4.1 A      mole wt.=  44.4650 g
      2 species in reaction
      1.0000 Be++           1.0000 Cl-           
      7.4357    4.8348    1.7040    -1.3097
      -4.4883    -7.2465    -9.7894    -12.3519
*    References DGf or LogK 97sve/sho ; DHf n/a
*    S° 97sve/sho ; Cp 97sve/sho


BeCl2(aq)
*     formula= BeCl2(0)
      charge=  0.0      ion size=  3.4 A      mole wt.=  79.9170 g
      2 species in reaction
      1.0000 Be++           2.0000 Cl-           
      8.7995    5.6829    1.8326    -1.9565
      -6.0295    -9.6136    -12.9355    -16.2576
*    References DGf or LogK 97sve/sho ; DHf n/a
*    S° 97sve/sho ; Cp 97sve/sho


BeF+
*     formula= BeF(1)
      charge=  1.0      ion size=  4.1 A      mole wt.=  28.0110 g
      2 species in reaction
      1.0000 Be++           1.0000 F-           
      1.3031    -0.4818    -2.6812    -4.8415
      -7.1706    -9.2426    -11.2021    -13.2168
*    References DGf or LogK 97sve/sho ; DHf n/a
*    S° 97sve/sho ; Cp 97sve/sho


BeF2(aq)
*     formula= BeF2(0)
      charge=  0.0      ion size=  3.4 A      mole wt.=  47.0090 g
      2 species in reaction
      1.0000 Be++           2.0000 F-           
      -2.9244    -4.5920    -6.7910    -9.0746
      -11.6690    -14.0967    -16.5017    -19.0930
*    References DGf or LogK 97sve/sho ; DHf n/a
*    S° 97sve/sho ; Cp 97sve/sho


BeF3-
*     formula= BeF3(-1)
      charge=  -1.0      ion size=  3.6 A      mole wt.=  66.0070 g
      2 species in reaction
      1.0000 Be++           3.0000 F-           
      -5.3389    -7.4216    -10.2213    -13.1693
      -16.5567    -19.7584    -22.9614    -26.4626
*    References DGf or LogK 97sve/sho ; DHf n/a
*    S° 97sve/sho ; Cp 97sve/sho


BeF4--
*     formula= BeF4(-2)
      charge=  -2.0      ion size=  4.7 A      mole wt.=  85.0060 g
      2 species in reaction
      1.0000 Be++           4.0000 F-           
      -4.3138    -8.0617    -12.8875    -17.7917
      -23.2303    -28.1816    -32.9476    -37.9431
*    References DGf or LogK 97sve/sho ; DHf n/a
*    S° 97sve/sho ; Cp 97sve/sho


BeO(aq)
*     formula= BeO(0)
      charge=  0.0      ion size=  3.4 A      mole wt.=  25.0120 g
      3 species in reaction
      1.0000 Be++           1.0000 H2O           -2.0000 H+           
      14.7099    13.6553    12.4454    11.3420
      10.2438    9.3446    8.5590    7.8196
*    References DGf or LogK 97asho/sas ; DHf n/a
*    S° 97asho/sas ; Cp 97asho/sas


BeO2--
*     formula= BeO2(-2)
      charge=  -2.0      ion size=  4.7 A      mole wt.=  41.0110 g
      3 species in reaction
      1.0000 Be++           2.0000 H2O           -4.0000 H+           
      39.9992    37.3893    34.4877    31.9577
      29.6365    28.0006    26.9122    26.3662
*    References DGf or LogK 97asho/sas ; DHf n/a
*    S° 97asho/sas ; Cp 97asho/sas


BeOH+
*     formula= BeOH(+)
      charge=  1.0      ion size=  4.1 A      mole wt.=  26.0200 g
      3 species in reaction
      1.0000 Be++           1.0000 H2O           -1.0000 H+           
      5.7957    5.3724    4.8482    4.3414
      3.8115    3.3593    2.9535    2.5669
*    References DGf or LogK 97asho/sas ; DHf n/a
*    S° 97asho/sas ; Cp 97asho/sas


BF4-
*     formula= BF4(-)
      charge=  -1.0      ion size=  3.6 A      mole wt.=  86.8050 g
      4 species in reaction
      1.0000 B(OH)3(aq)           4.0000 F-           3.0000 H+
      -3.0000 H2O           
      -18.5788    -18.1455    -17.9393    -18.0333
      -18.4893    -19.2663    -20.4029    -22.0862
*    References DGf or LogK 88sho/hel ; DHf n/a
*    S° 88sho/hel ; Cp 88sho/hel


BiO+
*     formula= BiO+
      charge=  1.0      ion size=  4.1 A      mole wt.=  224.9800 g
      3 species in reaction
      1.0000 Bi+++           1.0000 H2O           -2.0000 H+           
      4.6479    3.2980    1.9849    0.9948
      0.2176    -0.2608    -0.5820    -0.8426
*    References DGf or LogK 97asho/sas ; DHf n/a
*    S° 97asho/sas ; Cp 97asho/sas


BiO2-
*     formula= BiO2-
      charge=  -1.0      ion size=  3.6 A      mole wt.=  240.9790 g
      3 species in reaction
      1.0000 Bi+++           2.0000 H2O           -4.0000 H+           
      24.3176    21.0947    17.7745    15.0939
      12.8167    11.3100    10.3076    9.6682
*    References DGf or LogK 97asho/sas ; DHf n/a
*    S° 97asho/sas ; Cp 97asho/sas


BiOH++
*     formula= BiOH+2
      charge=  2.0      ion size=  5.7 A      mole wt.=  225.9880 g
      3 species in reaction
      1.0000 Bi+++           1.0000 H2O           -1.0000 H+           
      1.4076    1.0990    0.8239    0.6483
      0.5492    0.5212    0.5222    0.5230
*    References DGf or LogK 97asho/sas ; DHf n/a
*    S° 97asho/sas ; Cp 97asho/sas


Ca(HCO3)+
*     formula= Ca(HCO3)(+)
      charge=  1.0      ion size=  4.1 A      mole wt.=  101.0950 g
      2 species in reaction
      1.0000 HCO3-           1.0000 Ca++           
      -1.3220    -1.1030    -1.0385    -1.1718
      -1.5415    -2.0807    -2.7833    -3.7072
*    References DGf or LogK 82plu/bus ; DHf n/a
*    S° 99aki/zot ; Cp 99aki/zot


CaAsO4-
*     formula= CaAsO4-
      charge=  -1.0      ion size=  3.6 A      mole wt.=  178.9970 g
      3 species in reaction
      1.0000 H2AsO4-           1.0000 Ca++           -2.0000 H+           
      16.7234    14.8389    12.8390    11.1648
      9.6633    8.5782    7.7427    7.0345
*    References DGf or LogK 95mir/kis ; DHf n/a
*    S° 07mar/acc ; Cp 07mar/acc


CaCl+
*     formula= CaCl(+)
      charge=  1.0      ion size=  4.1 A      mole wt.=  75.5300 g
      2 species in reaction
      1.0000 Ca++           1.0000 Cl-           
      0.3557    0.2900    0.0938    -0.2138
      -0.6831    -1.2359    -1.8918    -2.7210
*    References DGf or LogK 97sve/sho ; DHf n/a
*    S° 97sve/sho ; Cp 97sve/sho


CaCl2(aq)
*     formula= CaCl2(0)
      charge=  0.0      ion size=  3.4 A      mole wt.=  110.9830 g
      2 species in reaction
      1.0000 Ca++           2.0000 Cl-           
      0.4580    0.6400    0.6332    0.4007
      -0.1230    -0.8642    -1.8477    -3.2062
*    References DGf or LogK 97sve/sho ; DHf n/a
*    S° 97sve/sho ; Cp 97sve/sho


CaCO3(aq)
*     formula= CaCO3(0)
      charge=  0.0      ion size=  3.4 A      mole wt.=  100.0870 g
      3 species in reaction
      1.0000 HCO3-           1.0000 Ca++           -1.0000 H+           
      7.5969    7.1070    6.5806    6.1187
      5.6497    5.2185    4.7453    4.1175
*    References DGf or LogK 82plu/bus ; DHf 82plu/bus
*    S° n/a ; Cp 97sve/sho


CaCrO4(aq)
*     formula= CaCrO4(0)
      charge=  0.0      ion size=  3.4 A      mole wt.=  156.0420 g
      2 species in reaction
      1.0000 Ca++           1.0000 CrO4--           
      -2.7700    -2.7700    -2.7700    -2.7700
      -2.7700    -2.7700    -2.7700    -2.7700
*    References DGf or LogK 00per/pal ; DHf n/a
*    S° n/a ; Cp n/a


CaF+
*     formula= CaF(+)
      charge=  1.0      ion size=  4.1 A      mole wt.=  59.0760 g
      2 species in reaction
      1.0000 Ca++           1.0000 F-           
      -0.6901    -0.7187    -0.8961    -1.2020
      -1.6835    -2.2575    -2.9415    -3.8051
*    References DGf or LogK 97sve/sho ; DHf n/a
*    S° 97sve/sho ; Cp 97sve/sho


CaH2AsO3+
*     formula= CaH2AsO3+
      charge=  1.0      ion size=  4.1 A      mole wt.=  165.0140 g
      2 species in reaction
      1.0000 H2AsO3-           1.0000 Ca++           
      -1.7446    -1.7446    -1.7446    -1.7446
      -1.7446    -1.7446    -1.7446    -1.7446
*    References DGf or LogK 07mar/acc ; DHf n/a
*    S° n/a ; Cp 07mar/acc


CaH2AsO4+
*     formula= CaH2AsO4+
      charge=  1.0      ion size=  4.1 A      mole wt.=  181.0130 g
      2 species in reaction
      1.0000 H2AsO4-           1.0000 Ca++           
      -1.4940    -1.3979    -1.3978    -1.5046
      -1.7458    -2.0894    -2.5504    -3.1942
*    References DGf or LogK 95mir/kis ; DHf n/a
*    S° 07mar/acc ; Cp 07mar/acc


CaH2PO4+
*     formula= CaH2PO4+
      charge=  1.0      ion size=  4.1 A      mole wt.=  137.0650 g
      2 species in reaction
      1.0000 Ca++           1.0000 H2PO4-           
      -1.3883    -1.5000    -1.6570    -1.8305
      -2.0601    -2.3360    -2.7073    -3.2665
*    References DGf or LogK 68chu/mar ; DHf n/a
*    S° 68chu/mar ; Cp n/a


CaHAsO4
*     formula= CaHAsO4
      charge=  0.0      ion size=  3.4 A      mole wt.=  180.0050 g
      3 species in reaction
      1.0000 H2AsO4-           1.0000 Ca++           -1.0000 H+           
      4.2319    4.0797    3.9030    3.7271
      3.5062    3.2447    2.8910    2.3513
*    References DGf or LogK 95mir/kis ; DHf n/a
*    S° 07mar/acc ; Cp 07mar/acc


CaHPO4(aq)
*     formula= CaHPO4(0)
      charge=  0.0      ion size=  3.4 A      mole wt.=  136.0570 g
      3 species in reaction
      1.0000 Ca++           1.0000 H2PO4-           -1.0000 H+           
      4.6386    4.3700    4.0328    3.6948
      3.3033    2.8997    2.4252    1.7808
*    References DGf or LogK 68chu/mar ; DHf n/a
*    S° 68chu/mar ; Cp n/a


CaOH+
*     formula= CaOH+
      charge=  1.0      ion size=  4.1 A      mole wt.=  57.0850 g
      3 species in reaction
      1.0000 Ca++           1.0000 H2O           -1.0000 H+           
      14.0282    12.7810    11.3717    10.1045
      8.8708    7.8979    7.0954    6.3988
*    References DGf or LogK 87gar/par ; DHf n/a
*    S° 97asho/sas ; Cp 97asho/sas


CaP2O7--
*     formula= CaP2O7-2
      charge=  -2.0      ion size=  4.7 A      mole wt.=  214.0210 g
      4 species in reaction
      1.0000 Ca++           2.0000 H2PO4-           -1.0000 H2O
      -2.0000 H+           
      11.0100    11.0100    11.0100    11.0100
      11.0100    11.0100    11.0100    11.0100
*    References DGf or LogK 76smi/mar ; DHf n/a
*    S° n/a ; Cp n/a


CaPO4-
*     formula= CaPO4-
      charge=  -1.0      ion size=  3.6 A      mole wt.=  135.0490 g
      3 species in reaction
      1.0000 Ca++           1.0000 H2PO4-           -2.0000 H+           
      13.7149    13.1100    12.3869    11.6965
      10.9580    10.2789    9.5740    8.7130
*    References DGf or LogK 68chu/mar ; DHf n/a
*    S° 68chu/mar ; Cp n/a


CaSO4(aq)
*     formula= CaSO4(0)
      charge=  0.0      ion size=  3.4 A      mole wt.=  136.1420 g
      2 species in reaction
      1.0000 Ca++           1.0000 SO4--           
      -2.2870    -2.3100    -2.4354    -2.6339
      -2.9552    -3.3891    -4.0085    -4.9744
*    References DGf or LogK 53bell/geo ; DHf n/a
*    S° 97sve/sho ; Cp n/a


Cd(CO3)2--
*     formula= Cd(CO3)2(-2)
      charge=  -2.0      ion size=  4.7 A      mole wt.=  232.4280 g
      3 species in reaction
      2.0000 HCO3-           1.0000 Cd++           -2.0000 H+           
      14.1540    14.1540    14.1540    14.1540
      14.1540    14.1540    14.1540    14.1540
*    References DGf or LogK 91rai/fel ; DHf n/a
*    S° n/a ; Cp n/a


Cd(H2PO4)+
*     formula= CdH2PO4(+1)
      charge=  1.0      ion size=  4.1 A      mole wt.=  209.3970 g
      2 species in reaction
      1.0000 Cd++           1.0000 H2PO4-           
      -1.8000    -1.8000    -1.8000    -1.8000
      -1.8000    -1.8000    -1.8000    -1.8000
*    References DGf or LogK 01aya/mad ; DHf n/a
*    S° n/a ; Cp n/a


Cd(HS)2
*     formula= Cd(HS)2
      charge=  0.0      ion size=  3.4 A      mole wt.=  178.5580 g
      2 species in reaction
      1.0000 Cd++           2.0000 HS-           
      -14.4300    -14.4300    -14.4300    -14.4300
      -14.4300    -14.4300    -14.4300    -14.4300
*    References DGf or LogK 99wan/tes ; DHf n/a
*    S° n/a ; Cp n/a


Cd(SO4)2--
*     formula= Cd(SO4)2-2
      charge=  -2.0      ion size=  4.7 A      mole wt.=  304.5370 g
      2 species in reaction
      1.0000 Cd++           2.0000 SO4--           
      -3.4400    -3.4400    -3.4400    -3.4400
      -3.4400    -3.4400    -3.4400    -3.4400
*    References DGf or LogK 76smi/mar ; DHf n/a
*    S° n/a ; Cp n/a


Cd2OH+++
*     formula= Cd2OH(+3)
      charge=  3.0      ion size=  8.2 A      mole wt.=  241.8270 g
      3 species in reaction
      2.0000 Cd++           1.0000 H2O           -1.0000 H+           
      10.1862    9.3904    8.5064    7.7379
      7.0074    6.4185    5.8793    5.3050
*    References DGf or LogK 06bla/pia ; DHf n/a
*    S° 06bla/pia ; Cp n/a


Cd4(OH)4++++
*     formula= Cd4(OH)4(+4)
      charge=  4.0      ion size=  11.6 A      mole wt.=  517.6690 g
      3 species in reaction
      4.0000 Cd++           4.0000 H2O           -4.0000 H+           
      34.8852    32.0762    28.9935    26.3507
      23.9120    22.0614    20.5180    19.0505
*    References DGf or LogK n/a ; DHf 99yun/glu
*    S° 99yun/glu ; Cp n/a


CdCl+
*     formula= CdCl(1)
      charge=  1.0      ion size=  4.2 A      mole wt.=  147.8620 g
      2 species in reaction
      1.0000 Cd++           1.0000 Cl-           
      -2.1136    -1.9700    -1.9376    -2.0405
      -2.3084    -2.6996    -3.2207    -3.9334
*    References DGf or LogK 76smi/mar ; DHf n/a
*    S° 97cro ; Cp 97sve/sho


CdCl2(aq)
*     formula= CdCl2(0)
      charge=  0.0      ion size=  3.4 A      mole wt.=  183.3150 g
      2 species in reaction
      1.0000 Cd++           2.0000 Cl-           
      -2.9165    -2.5900    -2.4620    -2.5935
      -3.0366    -3.7282    -4.6816    -6.0225
*    References DGf or LogK 76smi/mar ; DHf n/a
*    S° 97sve/sho ; Cp 97sve/sho


CdCl3-
*     formula= CdCl3(-1)
      charge=  -1.0      ion size=  3.6 A      mole wt.=  218.7670 g
      2 species in reaction
      1.0000 Cd++           3.0000 Cl-           
      -3.0115    -2.4000    -2.0452    -2.0596
      -2.4797    -3.2284    -4.2842    -5.7502
*    References DGf or LogK 76smi/mar ; DHf n/a
*    S° 97sve/sho ; Cp 97sve/sho


CdCl4--
*     formula= CdCl4(-2)
      charge=  -2.0      ion size=  4.7 A      mole wt.=  254.2200 g
      2 species in reaction
      1.0000 Cd++           4.0000 Cl-           
      -2.3685    -1.4700    -0.8685    -0.7305
      -1.0719    -1.8124    -2.8968    -4.4072
*    References DGf or LogK 76smi/mar ; DHf n/a
*    S° 97cro ; Cp 97sve/sho


CdCO3(aq)
*     formula= CdCO3(0)
      charge=  0.0      ion size=  3.4 A      mole wt.=  172.4190 g
      3 species in reaction
      1.0000 HCO3-           1.0000 Cd++           -1.0000 H+           
      5.9200    5.6270    5.2677    4.9205
      4.5359    4.1532    3.7096    3.1040
*    References DGf or LogK 91rai/fel ; DHf n/a
*    S° 97sve/sho ; Cp n/a


CdF+
*     formula= CdF(1)
      charge=  1.0      ion size=  4.1 A      mole wt.=  131.4080 g
      2 species in reaction
      1.0000 Cd++           1.0000 F-           
      -1.1136    -1.1059    -1.2341    -1.4822
      -1.8888    -2.3863    -2.9930    -3.7794
*    References DGf or LogK 97sve/sho ; DHf n/a
*    S° 97sve/sho ; Cp 97sve/sho


CdF2(aq)
*     formula= CdF2(0)
      charge=  0.0      ion size=  3.4 A      mole wt.=  150.4070 g
      2 species in reaction
      1.0000 Cd++           2.0000 F-           
      -1.7158    -1.4763    -1.4605    -1.6966
      -2.2458    -3.0306    -4.0781    -5.5226
*    References DGf or LogK 97sve/sho ; DHf n/a
*    S° 97sve/sho ; Cp 97sve/sho


CdHCO3+
*     formula= CdHCO3(+)
      charge=  1.0      ion size=  4.1 A      mole wt.=  173.4270 g
      2 species in reaction
      1.0000 HCO3-           1.0000 Cd++           
      -1.5030    -1.5030    -1.5030    -1.5030
      -1.5030    -1.5030    -1.5030    -1.5030
*    References DGf or LogK 92sti/par ; DHf n/a
*    S° n/a ; Cp n/a


CdHPO4
*     formula= CdHPO4
      charge=  0.0      ion size=  3.4 A      mole wt.=  208.3890 g
      3 species in reaction
      1.0000 Cd++           1.0000 H2PO4-           -1.0000 H+           
      2.3800    2.3800    2.3800    2.3800
      2.3800    2.3800    2.3800    2.3800
*    References DGf or LogK 01aya/mad ; DHf n/a
*    S° n/a ; Cp n/a


CdHS+
*     formula= CdHS(+1)
      charge=  1.0      ion size=  4.1 A      mole wt.=  145.4840 g
      2 species in reaction
      1.0000 Cd++           1.0000 HS-           
      -7.3800    -7.3800    -7.3800    -7.3800
      -7.3800    -7.3800    -7.3800    -7.3800
*    References DGf or LogK 99wan/tes ; DHf n/a
*    S° n/a ; Cp n/a


CdO(aq)
*     formula= CdO(0)
      charge=  0.0      ion size=  3.4 A      mole wt.=  128.4090 g
      3 species in reaction
      1.0000 Cd++           1.0000 H2O           -2.0000 H+           
      22.7680    20.9010    18.8181    16.9722
      15.2030    13.8279    12.7023    11.7189
*    References DGf or LogK 91rai/fel ; DHf n/a
*    S° 97asho/sas ; Cp 97asho/sas


CdO2--
*     formula= CdO2(-2)
      charge=  -2.0      ion size=  4.7 A      mole wt.=  144.4090 g
      3 species in reaction
      1.0000 Cd++           2.0000 H2O           -4.0000 H+           
      51.1842    47.4820    43.4402    39.9704
      36.8277    34.6287    33.1499    32.3338
*    References DGf or LogK 91rai/fel ; DHf n/a
*    S° 97asho/sas ; Cp 97asho/sas


CdOH+
*     formula= CdOH(+1)
      charge=  1.0      ion size=  4.1 A      mole wt.=  129.4170 g
      3 species in reaction
      1.0000 Cd++           1.0000 H2O           -1.0000 H+           
      10.9609    10.0810    9.0772    8.1725
      7.2925    6.5990    6.0249    5.5203
*    References DGf or LogK 81bae/mes ; DHf n/a
*    S° 81bae/mes ; Cp 97asho/sas


CdP2O7--
*     formula= CdP2O7(-2)
      charge=  -2.0      ion size=  4.7 A      mole wt.=  286.3530 g
      4 species in reaction
      1.0000 Cd++           2.0000 H2PO4-           -1.0000 H2O
      -2.0000 H+           
      9.1103    9.1103    9.1103    9.1103
      9.1103    9.1103    9.1103    9.1103
*    References DGf or LogK 06bla/pia ; DHf n/a
*    S° 06bla/pia ; Cp n/a


CdS2O3
*     formula= CdS2O3
      charge=  0.0      ion size=  3.4 A      mole wt.=  224.5400 g
      2 species in reaction
      1.0000 Cd++           1.0000 S2O3--           
      -2.4298    -2.4592    -2.6251    -2.9035
      -3.3554    -3.9375    -4.7114    -5.8307
*    References DGf or LogK n/a ; DHf 74nau/ryz
*    S° 74nau/ryz ; Cp n/a


CdSO4(aq)
*     formula= CdSO4(0)
      charge=  0.0      ion size=  3.4 A      mole wt.=  208.4740 g
      2 species in reaction
      1.0000 Cd++           1.0000 SO4--           
      -3.3651    -3.4400    -3.6730    -4.0215
      -4.5497    -5.1985    -6.0332    -7.2109
*    References DGf or LogK 76smi/mar ; DHf 97smi/mar
*    S° n/a ; Cp n/a


CeBr++
*     formula= CeBr+2
      charge=  2.0      ion size=  5.7 A      mole wt.=  220.0240 g
      2 species in reaction
      1.0000 Br-           1.0000 Ce+++           
      -0.3951    -0.3797    -0.5153    -0.7886
      -1.2411    -1.7927    -2.4558    -3.2935
*    References DGf or LogK 95haa/sho ; DHf n/a
*    S° 95haa/sho ; Cp 95haa/sho


CeCl++
*     formula= CeCl+2
      charge=  2.0      ion size=  5.7 A      mole wt.=  175.5720 g
      2 species in reaction
      1.0000 Ce+++           1.0000 Cl-           
      -0.1476    -0.3211    -0.6752    -1.1528
      -1.8146    -2.5407    -3.3550    -4.3280
*    References DGf or LogK 95haa/sho ; DHf n/a
*    S° 95haa/sho ; Cp 95haa/sho


CeCl2+
*     formula= CeCl2+
      charge=  1.0      ion size=  4.1 A      mole wt.=  211.0250 g
      2 species in reaction
      1.0000 Ce+++           2.0000 Cl-           
      0.1940    -0.0558    -0.5419    -1.1943
      -2.1145    -3.1588    -4.3846    -5.9394
*    References DGf or LogK 95haa/sho ; DHf n/a
*    S° 95haa/sho ; Cp 95haa/sho


CeCl3(aq)
*     formula= CeCl3(0)
      charge=  0.0      ion size=  3.4 A      mole wt.=  246.4770 g
      2 species in reaction
      1.0000 Ce+++           3.0000 Cl-           
      0.5481    0.3561    -0.0180    -0.5416
      -1.3364    -2.3241    -3.6010    -5.3948
*    References DGf or LogK 95haa/sho ; DHf n/a
*    S° 95haa/sho ; Cp 95haa/sho


CeCl4-
*     formula= CeCl4-
      charge=  -1.0      ion size=  3.6 A      mole wt.=  281.9300 g
      2 species in reaction
      1.0000 Ce+++           4.0000 Cl-           
      0.6573    0.6947    0.7154    0.6699
      0.4702    0.0587    -0.6630    -1.9184
*    References DGf or LogK 95haa/sho ; DHf n/a
*    S° 95haa/sho ; Cp 95haa/sho


CeClO4++
*     formula= CeClO4+2
      charge=  2.0      ion size=  5.7 A      mole wt.=  239.5700 g
      2 species in reaction
      1.0000 Ce+++           1.0000 ClO4-           
      -2.7952    -1.9102    -1.0987    -0.5352
      -0.1769    -0.0856    -0.2108    -0.5693
*    References DGf or LogK 95haa/sho ; DHf n/a
*    S° 95haa/sho ; Cp 95haa/sho


CeCO3+
*     formula= CeCO3+
      charge=  1.0      ion size=  4.1 A      mole wt.=  200.1290 g
      3 species in reaction
      1.0000 HCO3-           1.0000 Ce+++           -1.0000 H+           
      2.8867    2.9118    2.9663    3.0326
      3.0872    3.0763    2.9518    2.6173
*    References DGf or LogK 95haa/sho ; DHf n/a
*    S° 95haa/sho ; Cp 95haa/sho


CeF++
*     formula= CeF+2
      charge=  2.0      ion size=  5.7 A      mole wt.=  159.1180 g
      2 species in reaction
      1.0000 Ce+++           1.0000 F-           
      -3.9591    -4.2619    -4.7682    -5.3843
      -6.1838    -7.0249    -7.9446    -9.0208
*    References DGf or LogK 95haa/sho ; DHf n/a
*    S° 95haa/sho ; Cp 95haa/sho


CeF2+
*     formula= CeF2+
      charge=  1.0      ion size=  4.1 A      mole wt.=  178.1170 g
      2 species in reaction
      1.0000 Ce+++           2.0000 F-           
      -7.2028    -7.3510    -7.7319    -8.2894
      -9.1170    -10.0951    -11.2827    -12.8285
*    References DGf or LogK 95haa/sho ; DHf n/a
*    S° 95haa/sho ; Cp 95haa/sho


CeF3(aq)
*     formula= CeF3(aq)
      charge=  0.0      ion size=  3.4 A      mole wt.=  197.1150 g
      2 species in reaction
      1.0000 Ce+++           3.0000 F-           
      -9.8053    -9.6338    -9.6131    -9.7833
      -10.2388    -10.9768    -12.0826    -13.7767
*    References DGf or LogK 95haa/sho ; DHf n/a
*    S° 95haa/sho ; Cp 95haa/sho


CeF4-
*     formula= CeF4-
      charge=  -1.0      ion size=  3.6 A      mole wt.=  216.1140 g
      2 species in reaction
      1.0000 Ce+++           4.0000 F-           
      -12.3111    -11.5501    -10.7372    -10.0719
      -9.5780    -9.4522    -9.7618    -10.7235
*    References DGf or LogK 95haa/sho ; DHf n/a
*    S° 95haa/sho ; Cp 95haa/sho


CeH2PO4++
*     formula= CeH2PO4+2
      charge=  2.0      ion size=  5.7 A      mole wt.=  237.1070 g
      2 species in reaction
      1.0000 Ce+++           1.0000 H2PO4-           
      -1.4373    -1.2564    -1.2485    -1.4244
      -1.8102    -2.3298    -2.9799    -3.8140
*    References DGf or LogK 95haa/sho ; DHf n/a
*    S° 95haa/sho ; Cp 95haa/sho


CeHCO3++
*     formula= CeHCO3+2
      charge=  2.0      ion size=  5.7 A      mole wt.=  201.1370 g
      2 species in reaction
      1.0000 HCO3-           1.0000 Ce+++           
      -1.8773    -1.9356    -2.1989    -2.6210
      -3.2504    -3.9664    -4.7821    -5.7593
*    References DGf or LogK 95haa/sho ; DHf n/a
*    S° 95haa/sho ; Cp 95haa/sho


CeIO3++
*     formula= CeIO3+2
      charge=  2.0      ion size=  5.7 A      mole wt.=  315.0230 g
      2 species in reaction
      1.0000 Ce+++           1.0000 IO3-           
      -2.3175    -1.8999    -1.6026    -1.4973
      -1.5871    -1.8545    -2.2828    -2.9147
*    References DGf or LogK 95haa/sho ; DHf n/a
*    S° 95haa/sho ; Cp 95haa/sho


CeNO3++
*     formula= CeNO3+2
      charge=  2.0      ion size=  5.7 A      mole wt.=  202.1250 g
      2 species in reaction
      1.0000 Ce+++           1.0000 NO3-           
      -1.1591    -0.6546    -0.2565    -0.0564
      -0.0470    -0.2288    -0.5783    -1.1325
*    References DGf or LogK 95haa/sho ; DHf n/a
*    S° 95haa/sho ; Cp 95haa/sho


CeO+
*     formula= CeO+
      charge=  1.0      ion size=  4.1 A      mole wt.=  156.1190 g
      3 species in reaction
      1.0000 Ce+++           1.0000 H2O           -2.0000 H+           
      18.8654    16.4040    13.6888    11.3058
      9.0426    7.2980    5.8816    4.6635
*    References DGf or LogK 95haa/sho ; DHf n/a
*    S° 95haa/sho ; Cp 95haa/sho


CeO2-
*     formula= CeO2-
      charge=  -1.0      ion size=  3.6 A      mole wt.=  172.1190 g
      3 species in reaction
      1.0000 Ce+++           2.0000 H2O           -4.0000 H+           
      43.4730    38.7454    33.5560    29.0421
      24.8314    21.6944    19.2944    17.4448
*    References DGf or LogK 95haa/sho ; DHf n/a
*    S° 95haa/sho ; Cp 95haa/sho


CeO2H(aq)
*     formula= CeO2H(0)
      charge=  0.0      ion size=  3.4 A      mole wt.=  173.1270 g
      3 species in reaction
      1.0000 Ce+++           2.0000 H2O           -3.0000 H+           
      29.9312    26.1378    22.0698    18.6169
      15.4739    13.1758    11.4136    9.9768
*    References DGf or LogK 95haa/sho ; DHf n/a
*    S° 95haa/sho ; Cp 95haa/sho


CeOH++
*     formula= CeOH+2
      charge=  2.0      ion size=  5.7 A      mole wt.=  157.1270 g
      3 species in reaction
      1.0000 Ce+++           1.0000 H2O           -1.0000 H+           
      9.7801    8.4143    6.8589    5.4524
      4.0749    2.9793    2.0665    1.2710
*    References DGf or LogK 95haa/sho ; DHf n/a
*    S° 95haa/sho ; Cp 95haa/sho


CeSO4+
*     formula= CeSO4+
      charge=  1.0      ion size=  4.1 A      mole wt.=  236.1840 g
      2 species in reaction
      1.0000 Ce+++           1.0000 SO4--           
      -3.4702    -3.7227    -4.1216    -4.5986
      -5.2384    -5.9696    -6.8709    -8.1037
*    References DGf or LogK 95haa/sho ; DHf n/a
*    S° 95haa/sho ; Cp 95haa/sho


CF4(aq)
*     formula= CF4(0)
      charge=  0.0      ion size=  3.4 A      mole wt.=  88.0040 g
      4 species in reaction
      1.0000 HCO3-           4.0000 F-           5.0000 H+
      -3.0000 H2O           
      30.5113    26.8750    22.0677    17.0726
      11.4220    6.1849    1.0631    -4.4084
*    References DGf or LogK 01sch/sho ; DHf n/a
*    S° 01sch/sho ; Cp 01sch/sho


CH3Hg+
*     formula= CH3Hg+
      charge=  1.0      ion size=  4.1 A      mole wt.=  215.6250 g
      3 species in reaction
      1.0000 CH4(aq)           1.0000 Hg++           -1.0000 H+           
      -3.1463    -3.0000    -2.6843    -2.2509
      -1.6731    -1.1002    -0.5587    -0.0622
*    References DGf or LogK 18bla/bur ; DHf n/a
*    S° 18bla/bur ; Cp n/a


CH3HgCl
*     formula= CH3HgCl
      charge=  0.0      ion size=  3.4 A      mole wt.=  251.0770 g
      4 species in reaction
      1.0000 CH4(aq)           1.0000 Cl-           1.0000 Hg++
      -1.0000 H+           
      -9.2435    -8.4500    -7.4563    -6.4716
      -5.4428    -4.6207    -4.0108    -3.6632
*    References DGf or LogK 18bla/bur ; DHf n/a
*    S° 03ald/gan ; Cp n/a


CH3HgOH
*     formula= CH3HgOH
      charge=  0.0      ion size=  3.4 A      mole wt.=  232.6320 g
      4 species in reaction
      1.0000 CH4(aq)           1.0000 H2O           1.0000 Hg++
      -2.0000 H+           
      1.4764    1.5310    1.7826    2.2050
      2.8272    3.4842    4.1333    4.7512
*    References DGf or LogK 18bla/bur ; DHf n/a
*    S° 03ald/gan ; Cp n/a


CH3HgS-
*     formula= CH3HgS-
      charge=  -1.0      ion size=  3.6 A      mole wt.=  247.6910 g
      4 species in reaction
      1.0000 CH4(aq)           1.0000 HS-           1.0000 Hg++
      -2.0000 H+           
      -7.0000    -7.0000    -7.0000    -7.0000
      -7.0000    -7.0000    -7.0000    -7.0000
*    References DGf or LogK 18bla/bur ; DHf n/a
*    S° n/a ; Cp n/a


CH3HgSH
*     formula= CH3HgSH
      charge=  0.0      ion size=  3.4 A      mole wt.=  248.6980 g
      4 species in reaction
      1.0000 CH4(aq)           1.0000 HS-           1.0000 Hg++
      -1.0000 H+           
      -17.5000    -17.5000    -17.5000    -17.5000
      -17.5000    -17.5000    -17.5000    -17.5000
*    References DGf or LogK 18bla/bur ; DHf n/a
*    S° n/a ; Cp n/a


Co(HS)2(aq)
*     formula= Co(HS)2(aq)
      charge=  0.0      ion size=  3.4 A      mole wt.=  125.0810 g
      2 species in reaction
      1.0000 Co++           2.0000 HS-           
      -8.7700    -8.7700    -8.7700    -8.7700
      -8.7700    -8.7700    -8.7700    -8.7700
*    References DGf or LogK 74nau/ryz ; DHf n/a
*    S° n/a ; Cp n/a


CO2(aq)
*     formula= CO2(0)
      charge=  0.0      ion size=  3.4 A      mole wt.=  44.0100 g
      3 species in reaction
      1.0000 HCO3-           1.0000 H+           -1.0000 H2O           
      -6.5720    -6.3543    -6.2796    -6.3935
      -6.7234    -7.1998    -7.8073    -8.5959
*    References DGf or LogK n/a ; DHf 89cox/wag
*    S° 89cox/wag ; Cp 89bsho/hel, 01sch/sho


Co2OH+++
*     formula= Co2OH+3
      charge=  3.0      ion size=  8.2 A      mole wt.=  134.8740 g
      3 species in reaction
      2.0000 Co++           1.0000 H2O           -1.0000 H+           
      10.3135    9.8310    9.2878    8.8107
      8.3412    7.9302    7.5066    7.0023
*    References DGf or LogK 98ply/zha ; DHf 98ply/zha
*    S° n/a ; Cp n/a


CO3--
*     formula= CO3(-2)
      charge=  -2.0      ion size=  4.5 A      mole wt.=  60.0090 g
      2 species in reaction
      1.0000 HCO3-           -1.0000 H+           
      10.6194    10.3267    10.1271    10.0797
      10.1997    10.4720    10.8909    11.5063
*    References DGf or LogK n/a ; DHf 89cox/wag
*    S° 89cox/wag ; Cp 97asho/sas


Co4(OH)4++++
*     formula= Co4(OH)4+4
      charge=  4.0      ion size=  11.6 A      mole wt.=  303.7620 g
      3 species in reaction
      4.0000 Co++           4.0000 H2O           -4.0000 H+           
      32.3180    29.8841    27.1940    24.8703
      22.6941    20.9947    19.5169    18.0526
*    References DGf or LogK 98ply/zha ; DHf 98ply/zha
*    S° n/a ; Cp n/a


CoAsO4-
*     formula= CoAsO4-
      charge=  -1.0      ion size=  3.6 A      mole wt.=  197.8520 g
      3 species in reaction
      1.0000 H2AsO4-           1.0000 Co++           -2.0000 H+           
      13.2621    11.8050    10.3082    9.1143
      8.1140    7.4527    6.9883    6.6228
*    References DGf or LogK 95mir/kis ; DHf n/a
*    S° 07mar/acc ; Cp 07mar/acc


CoCl+
*     formula= CoCl(1)
      charge=  1.0      ion size=  4.1 A      mole wt.=  94.3860 g
      2 species in reaction
      1.0000 Cl-           1.0000 Co++           
      -0.6547    -0.5700    -0.5933    -0.7368
      -1.0346    -1.4422    -1.9718    -2.6881
*    References DGf or LogK 97sve/sho ; DHf n/a
*    S° 97sve/sho ; Cp 97sve/sho


CoCl2(aq)
*     formula= CoCl2(aq)
      charge=  0.0      ion size=  3.4 A      mole wt.=  129.8380 g
      2 species in reaction
      2.0000 Cl-           1.0000 Co++           
      0.0422    -0.0200    -0.0838    -0.1168
      -0.1534    -0.2578    -0.5265    -1.1310
*    References DGf or LogK 89pan/sus ; DHf 89pan/sus
*    S° n/a ; Cp n/a


CoCl3-
*     formula= CoCl3-
      charge=  -1.0      ion size=  3.6 A      mole wt.=  165.2900 g
      2 species in reaction
      3.0000 Cl-           1.0000 Co++           
      1.8129    1.7100    1.6019    1.5380
      1.4707    1.3160    0.9385    0.0927
*    References DGf or LogK 89pan/sus ; DHf 89pan/sus
*    S° n/a ; Cp n/a


CoCl4--
*     formula= CoCl4-2
      charge=  -2.0      ion size=  4.7 A      mole wt.=  200.7430 g
      2 species in reaction
      4.0000 Cl-           1.0000 Co++           
      2.5099    2.0900    1.7892    1.7528
      1.9401    2.1618    2.1838    1.6506
*    References DGf or LogK 89pan/sus ; DHf 89pan/sus
*    S° n/a ; Cp n/a


CoCO3(aq)
*     formula= CoCO3(aq)
      charge=  0.0      ion size=  3.4 A      mole wt.=  118.9420 g
      3 species in reaction
      1.0000 HCO3-           1.0000 Co++           -1.0000 H+           
      6.0970    6.0970    6.0970    6.0970
      6.0970    6.0970    6.0970    6.0970
*    References DGf or LogK 97smi/mar ; DHf n/a
*    S° n/a ; Cp n/a


CoF+
*     formula= CoF(1)
      charge=  1.0      ion size=  4.1 A      mole wt.=  77.9320 g
      2 species in reaction
      1.0000 Co++           1.0000 F-           
      -1.5569    -1.5000    -1.5475    -1.7053
      -2.0099    -2.4190    -2.9507    -3.6750
*    References DGf or LogK 97sve/sho ; DHf n/a
*    S° 97sve/sho ; Cp 97sve/sho


CoH2AsO4+
*     formula= CoH2AsO4+
      charge=  1.0      ion size=  4.1 A      mole wt.=  199.8680 g
      2 species in reaction
      1.0000 H2AsO4-           1.0000 Co++           
      -0.1939    -0.0682    -0.0206    -0.0626
      -0.2112    -0.4537    -0.8074    -1.3354
*    References DGf or LogK 07mar/acc ; DHf n/a
*    S° 07mar/acc ; Cp 07mar/acc


CoHAsO4
*     formula= CoHAsO4
      charge=  0.0      ion size=  3.4 A      mole wt.=  198.8600 g
      3 species in reaction
      1.0000 H2AsO4-           1.0000 Co++           -1.0000 H+           
      4.3625    4.2360    4.0894    3.9455
      3.7617    3.5322    3.2036    2.6825
*    References DGf or LogK 07mar/acc ; DHf n/a
*    S° 07mar/acc ; Cp 07mar/acc


CoHCO3+
*     formula= CoHCO3+
      charge=  1.0      ion size=  4.1 A      mole wt.=  119.9500 g
      2 species in reaction
      1.0000 HCO3-           1.0000 Co++           
      -1.8930    -1.8930    -1.8930    -1.8930
      -1.8930    -1.8930    -1.8930    -1.8930
*    References DGf or LogK 97smi/mar ; DHf n/a
*    S° n/a ; Cp n/a


CoHPO4(aq)
*     formula= CoHPO4(aq)
      charge=  0.0      ion size=  3.4 A      mole wt.=  154.9130 g
      3 species in reaction
      1.0000 Co++           1.0000 H2PO4-           -1.0000 H+           
      4.1500    4.1500    4.1500    4.1500
      4.1500    4.1500    4.1500    4.1500
*    References DGf or LogK 97smi/mar ; DHf n/a
*    S° n/a ; Cp n/a


CoHS+
*     formula= CoHS+
      charge=  1.0      ion size=  4.1 A      mole wt.=  92.0070 g
      2 species in reaction
      1.0000 Co++           1.0000 HS-           
      -5.6700    -5.6700    -5.6700    -5.6700
      -5.6700    -5.6700    -5.6700    -5.6700
*    References DGf or LogK 74nau/ryz ; DHf n/a
*    S° n/a ; Cp n/a


CoO(aq)
*     formula= CoO(+0)
      charge=  0.0      ion size=  3.4 A      mole wt.=  74.9330 g
      3 species in reaction
      1.0000 Co++           1.0000 H2O           -2.0000 H+           
      20.3014    18.6010    16.6643    14.9104
      13.1855    11.8033    10.6349    9.5841
*    References DGf or LogK 98ply/zha ; DHf n/a
*    S° 98ply/zha ; Cp 97asho/sas


CoO2--
*     formula= CoO2(-2)
      charge=  -2.0      ion size=  4.7 A      mole wt.=  90.9320 g
      3 species in reaction
      1.0000 Co++           2.0000 H2O           -4.0000 H+           
      49.9126    46.4220    42.5483    39.1650
      36.0379    33.7928    32.2301    31.3057
*    References DGf or LogK 98ply/zha ; DHf n/a
*    S° 97asho/sas ; Cp 97asho/sas


CoOH+
*     formula= CoOH(+1)
      charge=  1.0      ion size=  4.1 A      mole wt.=  75.9410 g
      3 species in reaction
      1.0000 Co++           1.0000 H2O           -1.0000 H+           
      9.9535    9.2310    8.3713    7.5650
      6.7457    6.0684    5.4808    4.9429
*    References DGf or LogK 98ply/zha ; DHf n/a
*    S° 06bla/pia ; Cp 97asho/sas


CoS2O3(aq)
*     formula= CoS2O3(aq)
      charge=  0.0      ion size=  3.4 A      mole wt.=  171.0630 g
      2 species in reaction
      1.0000 Co++           1.0000 S2O3--           
      -2.0500    -2.0500    -2.0500    -2.0500
      -2.0500    -2.0500    -2.0500    -2.0500
*    References DGf or LogK 51den/mon ; DHf n/a
*    S° n/a ; Cp n/a


CoSO4(aq)
*     formula= CoSO4(aq)
      charge=  0.0      ion size=  3.4 A      mole wt.=  154.9970 g
      2 species in reaction
      1.0000 Co++           1.0000 SO4--           
      -2.3350    -2.3000    -2.4163    -2.6682
      -3.1140    -3.7119    -4.5196    -5.6878
*    References DGf or LogK 97smi/mar ; DHf 97smi/mar
*    S° n/a ; Cp n/a


Cr(OH)3(H2PO4)-
*     formula= Cr(OH)3(H2PO4)-
      charge=  -1.0      ion size=  3.6 A      mole wt.=  199.9750 g
      4 species in reaction
      1.0000 Cr+++           1.0000 H2PO4-           3.0000 H2O
      -3.0000 H+           
      5.2096    4.3913    3.5143    2.7928
      2.1411    1.6160    1.0817    0.3811
*    References DGf or LogK n/a ; DHf 98zie/jon
*    S° 98zie/jon ; Cp n/a


Cr(OH)3(HPO4)--
*     formula= Cr(OH)3(HPO4)-2
      charge=  -2.0      ion size=  4.7 A      mole wt.=  198.9670 g
      4 species in reaction
      1.0000 Cr+++           1.0000 H2PO4-           3.0000 H2O
      -4.0000 H+           
      14.2500    13.2746    12.2172    11.3310
      10.5171    9.8621    9.2152    8.3953
*    References DGf or LogK n/a ; DHf 98zie/jon
*    S° 98zie/jon ; Cp n/a


Cr(OH)3(PO4)---
*     formula= Cr(OH)3(PO4)-3
      charge=  -3.0      ion size=  6.7 A      mole wt.=  197.9590 g
      4 species in reaction
      1.0000 Cr+++           1.0000 H2PO4-           3.0000 H2O
      -5.0000 H+           
      26.4631    24.5815    22.4838    20.6477
      18.8988    17.5045    16.2521    14.9060
*    References DGf or LogK n/a ; DHf 98zie/jon
*    S° 98zie/jon ; Cp n/a


Cr(OH)4(HPO4)(H2PO4)----
*     formula= Cr(OH)4(HPO4)(H2PO4)-4
      charge=  -4.0      ion size=  9.6 A      mole wt.=  312.9620 g
      4 species in reaction
      1.0000 Cr+++           2.0000 H2PO4-           4.0000 H2O
      -5.0000 H+           
      23.8063    22.9126    21.9765    21.2367
      20.5960    20.0754    19.4788    18.5199
*    References DGf or LogK n/a ; DHf 98zie/jon
*    S° 98zie/jon ; Cp n/a


Cr(OH)Cl2(aq)
*     formula= Cr(OH)Cl2(aq)
      charge=  0.0      ion size=  3.4 A      mole wt.=  139.8780 g
      4 species in reaction
      2.0000 Cl-           1.0000 Cr+++           1.0000 H2O
      -1.0000 H+           
      6.1976    5.7310    5.0592    4.3064
      3.3563    2.3340    1.1426    -0.3895
*    References DGf or LogK 76del/hep ; DHf 76del/hep
*    S° n/a ; Cp n/a


Cr2(OH)2++++
*     formula= Cr2(OH)2+4
      charge=  4.0      ion size=  11.6 A      mole wt.=  137.9470 g
      3 species in reaction
      2.0000 Cr+++           2.0000 H2O           -2.0000 H+           
      5.0000    5.0000    5.0000    5.0000
      5.0000    5.0000    5.0000    5.0000
*    References DGf or LogK 87rai/sas ; DHf n/a
*    S° n/a ; Cp n/a


Cr2O7--
*     formula= Cr2O7(-2)
      charge=  -2.0      ion size=  4.7 A      mole wt.=  215.9280 g
      3 species in reaction
      2.0000 CrO4--           2.0000 H+           -1.0000 H2O           
      -14.9174    -14.7510    -14.8149    -15.1269
      -15.7481    -16.5748    -17.6257    -19.0296
*    References DGf or LogK 04chi ; DHf n/a
*    S° 04chi ; Cp 97asho/sas


Cr3(OH)4+++++
*     formula= Cr3(OH)4+5
      charge=  5.0      ion size=  15.9 A      mole wt.=  223.9270 g
      3 species in reaction
      3.0000 Cr+++           4.0000 H2O           -4.0000 H+           
      10.7500    10.7500    10.7500    10.7500
      10.7500    10.7500    10.7500    10.7500
*    References DGf or LogK 87rai/sas ; DHf n/a
*    S° n/a ; Cp n/a


CrBr++
*     formula= CrBr+2
      charge=  2.0      ion size=  5.7 A      mole wt.=  131.8700 g
      2 species in reaction
      1.0000 Br-           1.0000 Cr+++           
      0.9720    0.6565    0.1794    -0.3743
      -1.0892    -1.8645    -2.7576    -3.8654
*    References DGf or LogK n/a ; DHf 76del/hep
*    S° 76del/hep ; Cp n/a


CrCl+
*     formula= CrCl+
      charge=  1.0      ion size=  4.1 A      mole wt.=  87.4180 g
      2 species in reaction
      1.0000 Cl-           1.0000 Cr++           
      -5.9575    -5.6000    -5.2688    -5.0472
      -4.9464    -5.0161    -5.2686    -5.7739
*    References DGf or LogK 91all/bro ; DHf 91all/bro
*    S° n/a ; Cp n/a


CrCl++
*     formula= CrCl+2
      charge=  2.0      ion size=  5.7 A      mole wt.=  87.4180 g
      2 species in reaction
      1.0000 Cl-           1.0000 Cr+++           
      -0.3316    -0.6200    -1.0636    -1.5876
      -2.2764    -3.0353    -3.9199    -5.0260
*    References DGf or LogK 64sil/mar ; DHf 64sil/mar
*    S° n/a ; Cp n/a


CrCl2+
*     formula= CrCl2+
      charge=  1.0      ion size=  4.1 A      mole wt.=  122.8710 g
      2 species in reaction
      2.0000 Cl-           1.0000 Cr+++           
      0.9718    0.7100    0.2321    -0.3911
      -1.2689    -2.2833    -3.5079    -5.0999
*    References DGf or LogK 64sil/mar ; DHf 64sil/mar
*    S° n/a ; Cp n/a


CrH2PO4++
*     formula= CrH2PO4+2
      charge=  2.0      ion size=  5.7 A      mole wt.=  148.9530 g
      2 species in reaction
      1.0000 Cr+++           1.0000 H2PO4-           
      -2.5495    -2.5495    -2.5495    -2.5495
      -2.5495    -2.5495    -2.5495    -2.5495
*    References DGf or LogK 76bae/mes ; DHf n/a
*    S° n/a ; Cp n/a


CrHPO4+
*     formula= CrHPO4+
      charge=  1.0      ion size=  4.1 A      mole wt.=  147.9450 g
      3 species in reaction
      1.0000 Cr+++           1.0000 H2PO4-           -1.0000 H+           
      -2.2005    -2.2005    -2.2005    -2.2005
      -2.2005    -2.2005    -2.2005    -2.2005
*    References DGf or LogK 71sil/mar ; DHf n/a
*    S° n/a ; Cp n/a


CrO+
*     formula= CrO+
      charge=  1.0      ion size=  4.1 A      mole wt.=  67.9650 g
      3 species in reaction
      1.0000 Cr+++           1.0000 H2O           -2.0000 H+           
      11.4473    9.8410    8.0599    6.4887
      4.9827    3.8024    2.8186    1.9425
*    References DGf or LogK 87rai/sas ; DHf n/a
*    S° 97asho/sas ; Cp 97asho/sas


CrO2-
*     formula= CrO2-
      charge=  -1.0      ion size=  3.6 A      mole wt.=  83.9650 g
      3 species in reaction
      1.0000 Cr+++           2.0000 H2O           -4.0000 H+           
      30.9506    27.6520    23.9450    20.6456
      17.4882    15.0691    13.1698    11.6901
*    References DGf or LogK 97asho/sas ; DHf n/a
*    S° 97asho/sas ; Cp 97asho/sas


CrO3Cl-
*     formula= CrO3Cl-
      charge=  -1.0      ion size=  3.6 A      mole wt.=  135.4170 g
      4 species in reaction
      1.0000 Cl-           1.0000 CrO4--           2.0000 H+
      -1.0000 H2O           
      -8.0939    -8.0800    -8.3085    -8.7661
      -9.5377    -10.5077    -11.7312    -13.4102
*    References DGf or LogK n/a ; DHf 76del/hep
*    S° 76del/hep ; Cp n/a


CrOH+
*     formula= CrOH+
      charge=  1.0      ion size=  4.1 A      mole wt.=  68.9730 g
      3 species in reaction
      1.0000 Cr++           1.0000 H2O           -1.0000 H+           
      5.7807    5.3010    4.7374    4.2113
      3.6691    3.2002    2.7589    2.3038
*    References DGf or LogK 83mic/deb ; DHf n/a
*    S° 97asho/sas ; Cp 97sho/sas


CrOH++
*     formula= CrOH+2
      charge=  2.0      ion size=  5.7 A      mole wt.=  68.9730 g
      3 species in reaction
      1.0000 Cr+++           1.0000 H2O           -1.0000 H+           
      4.1608    3.5710    2.8491    2.1542
      1.4270    0.8049    0.2454    -0.2817
*    References DGf or LogK 04chi ; DHf n/a
*    S° 97asho/sas ; Cp 97asho/sas


CsBr(aq)
*     formula= CsBr(0)
      charge=  0.0      ion size=  3.4 A      mole wt.=  212.8090 g
      2 species in reaction
      1.0000 Br-           1.0000 Cs+           
      0.0820    -0.0220    -0.1619    -0.3116
      -0.4974    -0.7042    -0.9665    -1.3575
*    References DGf or LogK 97sve/sho ; DHf n/a
*    S° 97sve/sho ; Cp 97sve/sho


CsCl(aq)
*     formula= CsCl(0)
      charge=  0.0      ion size=  3.4 A      mole wt.=  168.3580 g
      2 species in reaction
      1.0000 Cl-           1.0000 Cs+           
      0.2734    0.1260    -0.0676    -0.2714
      -0.5158    -0.7706    -1.0670    -1.4660
*    References DGf or LogK 97sve/sho ; DHf n/a
*    S° 97sve/sho ; Cp 97sve/sho


CsI(aq)
*     formula= CsI(0)
      charge=  0.0      ion size=  3.4 A      mole wt.=  259.8100 g
      2 species in reaction
      1.0000 Cs+           1.0000 I-           
      -1.0196    -0.9822    -0.9602    -0.9652
      -1.0116    -1.1082    -1.2750    -1.5691
*    References DGf or LogK 97sve/sho ; DHf n/a
*    S° 97sve/sho ; Cp 97sve/sho


CsOH(aq)
*     formula= CsOH(0)
      charge=  0.0      ion size=  3.4 A      mole wt.=  149.9130 g
      3 species in reaction
      1.0000 Cs+           1.0000 H2O           -1.0000 H+           
      16.9020    15.6784    14.3741    13.2864
      12.3303    11.6734    11.2161    10.8921
*    References DGf or LogK 97asho/sas ; DHf n/a
*    S° 97asho/sas ; Cp 97asho/sas


Cu(HS)2-
*     formula= Cu(HS)2(-1)
      charge=  -1.0      ion size=  3.6 A      mole wt.=  129.6940 g
      2 species in reaction
      1.0000 Cu+           2.0000 HS-           
      -18.3029    -16.8800    -15.3117    -13.9438
      -12.6912    -11.8277    -11.3027    -11.1556
*    References DGf or LogK 00pui ; DHf n/a
*    S° 00pui ; Cp 01aki/zot


Cu(NH3)4++
*     formula= Cu(NH3)4+2
      charge=  2.0      ion size=  5.7 A      mole wt.=  131.6680 g
      2 species in reaction
      1.0000 Cu++           4.0000 NH3(aq)           
      -13.7986    -12.3500    -10.6990    -9.1254
      -7.4734    -6.0823    -4.9038    -3.9047
*    References DGf or LogK 00pui ; DHf n/a
*    S° 00pui ; Cp n/a


Cu(OH)2-
*     formula= Cu(OH)2(-1)
      charge=  -1.0      ion size=  3.6 A      mole wt.=  97.5610 g
      3 species in reaction
      1.0000 Cu+           2.0000 H2O           -2.0000 H+           
      16.2309    16.1828    16.3147    16.6293
      17.1652    17.8022    18.5227    19.3600
*    References DGf or LogK 95bev/pui ; DHf n/a
*    S° 00pui ; Cp 01aki/zot


Cu2(OH)+++
*     formula= Cu2(OH)+3
      charge=  3.0      ion size=  8.2 A      mole wt.=  144.0990 g
      3 species in reaction
      2.0000 Cu++           1.0000 H2O           -1.0000 H+           
      6.7786    6.4010    5.9276    5.4548
      4.9190    4.3932    3.8263    3.1623
*    References DGf or LogK 07pow/bro ; DHf n/a
*    S° 97ply/wan ; Cp n/a


Cu2(OH)2++
*     formula= Cu2(OH)2+2
      charge=  2.0      ion size=  5.7 A      mole wt.=  161.1070 g
      3 species in reaction
      2.0000 Cu++           2.0000 H2O           -2.0000 H+           
      11.6046    10.4320    9.0596    7.7813
      6.4704    5.3493    4.3135    3.2727
*    References DGf or LogK 07pow/bro ; DHf n/a
*    S° 97ply/wan ; Cp n/a


Cu2S(HS)2--
*     formula= Cu2S(HS)2-2
      charge=  -2.0      ion size=  4.7 A      mole wt.=  225.3060 g
      3 species in reaction
      2.0000 Cu+           3.0000 HS-           -1.0000 H+           
      -32.9314    -29.3000    -25.0677    -21.1083
      -17.1417    -14.0406    -11.7140    -10.2606
*    References DGf or LogK 00pui ; DHf n/a
*    S° 00pui ; Cp n/a


Cu3(OH)4++
*     formula= Cu3(OH)4+2
      charge=  2.0      ion size=  5.7 A      mole wt.=  258.6670 g
      3 species in reaction
      3.0000 Cu++           4.0000 H2O           -4.0000 H+           
      22.8372    21.1041    19.0510    17.1114
      15.0905    13.3371    11.7022    10.0544
*    References DGf or LogK 07pow/bro ; DHf n/a
*    S° 97ply/wan ; Cp n/a


CuAsO4-
*     formula= CuAsO4-
      charge=  -1.0      ion size=  3.6 A      mole wt.=  202.4650 g
      3 species in reaction
      1.0000 H2AsO4-           1.0000 Cu++           -2.0000 H+           
      10.6177    9.3253    8.0220    7.0099
      6.1938    5.6812    5.3379    5.0701
*    References DGf or LogK 07mar/acc ; DHf n/a
*    S° 07mar/acc ; Cp 07mar/acc


CuCl+
*     formula= CuCl(1)
      charge=  1.0      ion size=  4.1 A      mole wt.=  98.9980 g
      2 species in reaction
      1.0000 Cl-           1.0000 Cu++           
      -0.7851    -0.8300    -1.0175    -1.3228
      -1.7911    -2.3428    -2.9973    -3.8237
*    References DGf or LogK 07pow/bro ; DHf n/a
*    S° 00pui ; Cp 97sve/sho


CuCl(aq)
*     formula= CuCl(0)
      charge=  0.0      ion size=  3.4 A      mole wt.=  98.9980 g
      2 species in reaction
      1.0000 Cl-           1.0000 Cu+           
      -3.7901    -3.6007    -3.3965    -3.2344
      -3.1254    -3.1182    -3.2321    -3.5346
*    References DGf or LogK 01aki/zot ; DHf n/a
*    S° 01aki/zot ; Cp 01aki/zot


CuCl2(aq)
*     formula= CuCl2(0)
      charge=  0.0      ion size=  3.4 A      mole wt.=  134.4510 g
      2 species in reaction
      2.0000 Cl-           1.0000 Cu++           
      -0.4883    -0.6000    -0.9849    -1.5923
      -2.5131    -3.5922    -4.8710    -6.4925
*    References DGf or LogK 07pow/bro ; DHf n/a
*    S° 00pui ; Cp 97sve/sho


CuCl2-
*     formula= CuCl2(-1)
      charge=  -1.0      ion size=  3.6 A      mole wt.=  134.4510 g
      2 species in reaction
      2.0000 Cl-           1.0000 Cu+           
      -4.8552    -4.8131    -4.8156    -4.8807
      -5.0444    -5.3056    -5.6975    -6.3122
*    References DGf or LogK 01aki/zot ; DHf n/a
*    S° 01aki/zot ; Cp 01aki/zot


CuCl3-
*     formula= CuCl3(-1)
      charge=  -1.0      ion size=  3.6 A      mole wt.=  169.9030 g
      2 species in reaction
      3.0000 Cl-           1.0000 Cu++           
      1.4767    1.2800    0.6878    -0.2060
      -1.5058    -2.9599    -4.5952    -6.5451
*    References DGf or LogK 00pui ; DHf n/a
*    S° 00pui ; Cp 97sve/sho


CuCl3--
*     formula= CuCl3(-2)
      charge=  -2.0      ion size=  4.7 A      mole wt.=  169.9030 g
      2 species in reaction
      3.0000 Cl-           1.0000 Cu+           
      -5.0147    -4.5925    -4.1653    -3.8425
      -3.6257    -3.5832    -3.7176    -4.0925
*    References DGf or LogK 05liu/mcp ; DHf n/a
*    S° 05liu/mcp ; Cp 05liu/mcp


CuCl4--
*     formula= CuCl4(-2)
      charge=  -2.0      ion size=  4.7 A      mole wt.=  205.3560 g
      2 species in reaction
      4.0000 Cl-           1.0000 Cu++           
      4.2289    3.9800    3.2333    2.1156
      0.5148    -1.2369    -3.1522    -5.3574
*    References DGf or LogK 00pui ; DHf n/a
*    S° 00pui ; Cp 97sve/sho


CuCO3
*     formula= CuCO3
      charge=  0.0      ion size=  3.4 A      mole wt.=  123.5550 g
      3 species in reaction
      1.0000 HCO3-           1.0000 Cu++           -1.0000 H+           
      3.8021    3.5600    3.3263    3.1716
      3.0662    2.9804    2.8361    2.5256
*    References DGf or LogK 07pow/bro ; DHf n/a
*    S° 00pui ; Cp n/a


CuF+
*     formula= CuF(1)
      charge=  1.0      ion size=  4.1 A      mole wt.=  82.5440 g
      2 species in reaction
      1.0000 Cu++           1.0000 F-           
      -1.4364    -1.5800    -1.8854    -2.2967
      -2.8659    -3.4948    -4.2128    -5.0970
*    References DGf or LogK 00pui ; DHf n/a
*    S° 00pui ; Cp 97sve/sho


CuH2AsO3+
*     formula= CuH2AsO3+
      charge=  1.0      ion size=  4.1 A      mole wt.=  188.4820 g
      2 species in reaction
      1.0000 H2AsO3-           1.0000 Cu++           
      -7.7864    -7.0544    -6.1859    -5.3610
      -4.5297    -3.8874    -3.4282    -3.1863
*    References DGf or LogK 07mar/acc ; DHf n/a
*    S° 07mar/acc ; Cp 07mar/acc


CuH2AsO4+
*     formula= CuH2AsO4+
      charge=  1.0      ion size=  4.1 A      mole wt.=  204.4810 g
      2 species in reaction
      1.0000 H2AsO4-           1.0000 Cu++           
      -1.9789    -1.7599    -1.6071    -1.5534
      -1.6084    -1.7784    -2.0756    -2.5600
*    References DGf or LogK 07mar/acc ; DHf n/a
*    S° 07mar/acc ; Cp 07mar/acc


CuH2PO4
*     formula= CuH2PO4
      charge=  0.0      ion size=  3.4 A      mole wt.=  160.5330 g
      2 species in reaction
      1.0000 Cu+           1.0000 H2PO4-           
      -0.8634    -0.8700    -0.8593    -0.8265
      -0.7836    -0.7714    -0.8334    -1.0513
*    References DGf or LogK 00pui ; DHf n/a
*    S° 00pui ; Cp n/a


CuH2PO4+
*     formula= CuH2PO4+
      charge=  1.0      ion size=  4.1 A      mole wt.=  160.5330 g
      2 species in reaction
      1.0000 Cu++           1.0000 H2PO4-           
      -1.2729    -1.1400    -1.1132    -1.2263
      -1.5230    -1.9657    -2.5665    -3.3939
*    References DGf or LogK 00pui ; DHf n/a
*    S° 00pui ; Cp n/a


CuHAsO4
*     formula= CuHAsO4
      charge=  0.0      ion size=  3.4 A      mole wt.=  203.4730 g
      3 species in reaction
      1.0000 H2AsO4-           1.0000 Cu++           -1.0000 H+           
      3.3095    3.2406    3.1680    3.1013
      3.0050    2.8550    2.5993    2.1458
*    References DGf or LogK 07mar/acc ; DHf n/a
*    S° 07mar/acc ; Cp 07mar/acc


CuHCO3+
*     formula= CuHCO3+
      charge=  1.0      ion size=  4.1 A      mole wt.=  124.5630 g
      2 species in reaction
      1.0000 HCO3-           1.0000 Cu++           
      -1.7478    -1.8400    -2.0585    -2.3798
      -2.8613    -3.4314    -4.1190    -5.0033
*    References DGf or LogK 07pow/bro ; DHf n/a
*    S° 00pui ; Cp n/a


CuHPO4(aq)
*     formula= CuHPO4(0)
      charge=  0.0      ion size=  3.4 A      mole wt.=  159.5250 g
      3 species in reaction
      1.0000 Cu++           1.0000 H2PO4-           -1.0000 H+           
      4.2539    3.9600    3.6445    3.3885
      3.1508    2.9312    2.6536    2.2107
*    References DGf or LogK 07pow/bro ; DHf n/a
*    S° 00pui ; Cp n/a


CuHS(aq)
*     formula= CuHS(0)
      charge=  0.0      ion size=  3.4 A      mole wt.=  96.6200 g
      2 species in reaction
      1.0000 Cu+           1.0000 HS-           
      -13.8206    -13.0200    -12.1151    -11.3080
      -10.5554    -10.0314    -9.7191    -9.6625
*    References DGf or LogK 00pui ; DHf n/a
*    S° 01aki/zot ; Cp 01aki/zot


CuNO2+
*     formula= CuNO2+
      charge=  1.0      ion size=  4.1 A      mole wt.=  109.5520 g
      2 species in reaction
      1.0000 Cu++           1.0000 NO2-           
      -2.1045    -1.9600    -1.9110    -1.9834
      -2.2091    -2.5645    -3.0651    -3.7795
*    References DGf or LogK 00pui ; DHf n/a
*    S° 00pui ; Cp n/a


CuNO3+
*     formula= CuNO3+
      charge=  1.0      ion size=  4.1 A      mole wt.=  125.5510 g
      2 species in reaction
      1.0000 Cu++           1.0000 NO3-           
      -0.6671    -0.5000    -0.4169    -0.4512
      -0.6320    -0.9447    -1.4033    -2.0735
*    References DGf or LogK 00pui ; DHf n/a
*    S° 00pui ; Cp n/a


CuO(aq)
*     formula= CuO(0)
      charge=  0.0      ion size=  3.4 A      mole wt.=  79.5450 g
      3 species in reaction
      1.0000 Cu++           1.0000 H2O           -2.0000 H+           
      17.5807    16.2010    14.6580    13.2938
      11.9965    11.0066    10.2312    9.6384
*    References DGf or LogK 07pow/bro ; DHf n/a
*    S° 97asho/sas ; Cp 97asho/sas


CuO2--
*     formula= CuO2(-2)
      charge=  -2.0      ion size=  4.7 A      mole wt.=  95.5450 g
      3 species in reaction
      1.0000 Cu++           2.0000 H2O           -4.0000 H+           
      42.6794    39.7420    36.5667    33.8793
      31.4971    29.8882    28.8768    28.4377
*    References DGf or LogK 07pow/bro ; DHf n/a
*    S° 97ply/wan ; Cp 97asho/sas


CuOH+
*     formula= CuOH(+1)
      charge=  1.0      ion size=  4.1 A      mole wt.=  80.5530 g
      3 species in reaction
      1.0000 Cu++           1.0000 H2O           -1.0000 H+           
      8.7591    7.9510    7.0243    6.1868
      5.3692    4.7200    4.1759    3.6907
*    References DGf or LogK 07pow/bro ; DHf n/a
*    S° 97ply/wan ; Cp 97asho/sas


CuOH(aq)
*     formula= CuOH(0)
      charge=  0.0      ion size=  3.4 A      mole wt.=  80.5530 g
      3 species in reaction
      1.0000 Cu+           1.0000 H2O           -1.0000 H+           
      13.2221    11.5549    9.7419    8.1003
      6.4466    5.0829    3.9141    2.8757
*    References DGf or LogK 95bev/pui ; DHf n/a
*    S° 00pui ; Cp 01aki/zot


CuSO4
*     formula= CuSO4
      charge=  0.0      ion size=  3.4 A      mole wt.=  159.6100 g
      2 species in reaction
      1.0000 Cu++           1.0000 SO4--           
      -2.2767    -2.3500    -2.5253    -2.7568
      -3.0954    -3.5317    -4.1465    -5.1038
*    References DGf or LogK 07pow/bro ; DHf 07pow/bro
*    S° n/a ; Cp n/a


DyCl++
*     formula= DyCl+2
      charge=  2.0      ion size=  5.7 A      mole wt.=  197.9520 g
      2 species in reaction
      1.0000 Cl-           1.0000 Dy+++           
      -0.0912    -0.2478    -0.5816    -1.0393
      -1.6795    -2.3863    -3.1825    -4.1385
*    References DGf or LogK 95haa/sho ; DHf n/a
*    S° 95haa/sho ; Cp 95haa/sho


DyCl2+
*     formula= DyCl2+
      charge=  1.0      ion size=  4.1 A      mole wt.=  233.4050 g
      2 species in reaction
      2.0000 Cl-           1.0000 Dy+++           
      0.1979    0.0175    -0.4219    -1.0605
      -1.9960    -3.0753    -4.3462    -5.9515
*    References DGf or LogK 95haa/sho ; DHf n/a
*    S° 95haa/sho ; Cp 95haa/sho


DyCl3(aq)
*     formula= DyCl3(aq)
      charge=  0.0      ion size=  3.4 A      mole wt.=  268.8570 g
      2 species in reaction
      3.0000 Cl-           1.0000 Dy+++           
      0.4736    0.4294    0.1442    -0.3705
      -1.2323    -2.3365    -3.7587    -5.7141
*    References DGf or LogK 95haa/sho ; DHf n/a
*    S° 95haa/sho ; Cp 95haa/sho


DyCl4-
*     formula= DyCl4-
      charge=  -1.0      ion size=  3.6 A      mole wt.=  304.3100 g
      2 species in reaction
      4.0000 Cl-           1.0000 Dy+++           
      0.5459    0.8413    1.0148    0.9824
      0.6671    0.0609    -0.8963    -2.4079
*    References DGf or LogK 95haa/sho ; DHf n/a
*    S° 95haa/sho ; Cp 95haa/sho


DyCO3+
*     formula= DyCO3+
      charge=  1.0      ion size=  4.1 A      mole wt.=  222.5090 g
      3 species in reaction
      1.0000 HCO3-           1.0000 Dy+++           -1.0000 H+           
      2.2191    2.3158    2.4734    2.6528
      2.8388    2.9486    2.9346    2.6978
*    References DGf or LogK 95haa/sho ; DHf n/a
*    S° 95haa/sho ; Cp 95haa/sho


DyF++
*     formula= DyF+2
      charge=  2.0      ion size=  5.7 A      mole wt.=  181.4980 g
      2 species in reaction
      1.0000 Dy+++           1.0000 F-           
      -4.3966    -4.7017    -5.2094    -5.8259
      -6.6248    -7.4647    -8.3829    -9.4574
*    References DGf or LogK 95haa/sho ; DHf n/a
*    S° 95haa/sho ; Cp 95haa/sho


DyF2+
*     formula= DyF2+
      charge=  1.0      ion size=  4.1 A      mole wt.=  200.4970 g
      2 species in reaction
      1.0000 Dy+++           2.0000 F-           
      -8.1329    -8.2306    -8.5863    -9.1500
      -10.0139    -11.0457    -12.2962    -13.9101
*    References DGf or LogK 95haa/sho ; DHf n/a
*    S° 95haa/sho ; Cp 95haa/sho


DyF3(aq)
*     formula= DyF3(aq)
      charge=  0.0      ion size=  3.4 A      mole wt.=  219.4950 g
      2 species in reaction
      1.0000 Dy+++           3.0000 F-           
      -11.1819    -10.8799    -10.7901    -10.9695
      -11.5098    -12.3784    -13.6408    -15.5059
*    References DGf or LogK 95haa/sho ; DHf n/a
*    S° 95haa/sho ; Cp 95haa/sho


DyF4-
*     formula= DyF4-
      charge=  -1.0      ion size=  3.6 A      mole wt.=  238.4940 g
      2 species in reaction
      1.0000 Dy+++           4.0000 F-           
      -14.0246    -13.0161    -12.0623    -11.3954
      -11.0303    -11.1135    -11.6770    -12.9229
*    References DGf or LogK 95haa/sho ; DHf n/a
*    S° 95haa/sho ; Cp 95haa/sho


DyH2PO4++
*     formula= DyH2PO4+2
      charge=  2.0      ion size=  5.7 A      mole wt.=  259.4870 g
      2 species in reaction
      1.0000 Dy+++           1.0000 H2PO4-           
      -1.1709    -0.9632    -0.9235    -1.0691
      -1.4226    -1.9136    -2.5373    -3.3469
*    References DGf or LogK 95haa/sho ; DHf n/a
*    S° 95haa/sho ; Cp 95haa/sho


DyHCO3++
*     formula= DyHCO3+2
      charge=  2.0      ion size=  5.7 A      mole wt.=  223.5170 g
      2 species in reaction
      1.0000 HCO3-           1.0000 Dy+++           
      -1.6869    -1.7157    -1.9442    -2.3331
      -2.9276    -3.6132    -4.4008    -5.3511
*    References DGf or LogK 95haa/sho ; DHf n/a
*    S° 95haa/sho ; Cp 95haa/sho


DyNO3++
*     formula= DyNO3+2
      charge=  2.0      ion size=  5.7 A      mole wt.=  224.5050 g
      2 species in reaction
      1.0000 Dy+++           1.0000 NO3-           
      -0.7068    -0.1415    0.3272    0.5934
      0.6707    0.5467    0.2483    -0.2610
*    References DGf or LogK 95haa/sho ; DHf n/a
*    S° 95haa/sho ; Cp 95haa/sho


DyO+
*     formula= DyO+
      charge=  1.0      ion size=  4.1 A      mole wt.=  178.4990 g
      3 species in reaction
      1.0000 Dy+++           1.0000 H2O           -2.0000 H+           
      18.4991    16.1108    13.4931    11.2118
      9.0626    7.4206    6.0989    4.9714
*    References DGf or LogK 95haa/sho ; DHf n/a
*    S° 95haa/sho ; Cp 95haa/sho


DyO2-
*     formula= DyO2-
      charge=  -1.0      ion size=  3.6 A      mole wt.=  194.4990 g
      3 species in reaction
      1.0000 Dy+++           2.0000 H2O           -4.0000 H+           
      37.6316    33.4678    28.9146    24.9724
      21.3160    18.6109    16.5595    15.0041
*    References DGf or LogK 95haa/sho ; DHf n/a
*    S° 95haa/sho ; Cp 95haa/sho


DyO2H(aq)
*     formula= DyO2H(aq)
      charge=  0.0      ion size=  3.4 A      mole wt.=  195.5070 g
      3 species in reaction
      1.0000 Dy+++           2.0000 H2O           -3.0000 H+           
      28.4217    24.8184    20.9560    17.6794
      14.6971    12.5140    10.8344    9.4570
*    References DGf or LogK 95haa/sho ; DHf n/a
*    S° 95haa/sho ; Cp 95haa/sho


DyOH++
*     formula= DyOH+2
      charge=  2.0      ion size=  5.7 A      mole wt.=  179.5070 g
      3 species in reaction
      1.0000 Dy+++           1.0000 H2O           -1.0000 H+           
      9.1065    7.8279    6.3878    5.1007
      3.8559    2.8784    2.0728    1.3766
*    References DGf or LogK 95haa/sho ; DHf n/a
*    S° 95haa/sho ; Cp 95haa/sho


DySO4+
*     formula= DySO4+
      charge=  1.0      ion size=  4.1 A      mole wt.=  258.5640 g
      2 species in reaction
      1.0000 Dy+++           1.0000 SO4--           
      -3.4433    -3.7227    -4.1316    -4.5990
      -5.2103    -5.9033    -6.7624    -7.9525
*    References DGf or LogK 95haa/sho ; DHf n/a
*    S° 95haa/sho ; Cp 95haa/sho


ErCl++
*     formula= ErCl+2
      charge=  2.0      ion size=  5.7 A      mole wt.=  202.7120 g
      2 species in reaction
      1.0000 Cl-           1.0000 Er+++           
      -0.1801    -0.3211    -0.6296    -1.0575
      -1.6612    -2.3329    -3.0955    -4.0196
*    References DGf or LogK 95haa/sho ; DHf n/a
*    S° 95haa/sho ; Cp 95haa/sho


ErCl2+
*     formula= ErCl2+
      charge=  1.0      ion size=  4.1 A      mole wt.=  238.1650 g
      2 species in reaction
      2.0000 Cl-           1.0000 Er+++           
      0.1765    0.0175    -0.3771    -0.9566
      -1.8146    -2.8159    -4.0102    -5.5413
*    References DGf or LogK 95haa/sho ; DHf n/a
*    S° 95haa/sho ; Cp 95haa/sho


ErCl3(aq)
*     formula= ErCl3(aq)
      charge=  0.0      ion size=  3.4 A      mole wt.=  273.6170 g
      2 species in reaction
      3.0000 Cl-           1.0000 Er+++           
      0.4320    0.4294    0.2303    -0.1717
      -0.8879    -1.8491    -3.1338    -4.9584
*    References DGf or LogK 95haa/sho ; DHf n/a
*    S° 95haa/sho ; Cp 95haa/sho


ErCl4-
*     formula= ErCl4-
      charge=  -1.0      ion size=  3.6 A      mole wt.=  309.0700 g
      2 species in reaction
      4.0000 Cl-           1.0000 Er+++           
      0.4682    0.8413    1.1656    1.3265
      1.2599    0.8998    0.1818    -1.1007
*    References DGf or LogK 95haa/sho ; DHf n/a
*    S° 95haa/sho ; Cp 95haa/sho


ErCO3+
*     formula= ErCO3+
      charge=  1.0      ion size=  4.1 A      mole wt.=  227.2690 g
      3 species in reaction
      1.0000 HCO3-           1.0000 Er+++           -1.0000 H+           
      2.0450    2.1692    2.3583    2.5665
      2.7815    2.9150    2.9205    2.6980
*    References DGf or LogK 95haa/sho ; DHf n/a
*    S° 95haa/sho ; Cp 95haa/sho


ErF++
*     formula= ErF+2
      charge=  2.0      ion size=  5.7 A      mole wt.=  186.2580 g
      2 species in reaction
      1.0000 Er+++           1.0000 F-           
      -4.4515    -4.7750    -5.2965    -5.9188
      -6.7168    -7.5505    -8.4593    -9.5224
*    References DGf or LogK 95haa/sho ; DHf n/a
*    S° 95haa/sho ; Cp 95haa/sho


ErF2+
*     formula= ErF2+
      charge=  1.0      ion size=  4.1 A      mole wt.=  205.2570 g
      2 species in reaction
      1.0000 Er+++           2.0000 F-           
      -8.2623    -8.3772    -8.7325    -9.2777
      -10.1048    -11.0921    -12.2948    -13.8594
*    References DGf or LogK 95haa/sho ; DHf n/a
*    S° 95haa/sho ; Cp 95haa/sho


ErF3(aq)
*     formula= ErF3(aq)
      charge=  0.0      ion size=  3.4 A      mole wt.=  224.2550 g
      2 species in reaction
      1.0000 Er+++           3.0000 F-           
      -11.3175    -11.0265    -10.9110    -11.0329
      -11.4818    -12.2500    -13.4097    -15.1725
*    References DGf or LogK 95haa/sho ; DHf n/a
*    S° 95haa/sho ; Cp 95haa/sho


ErF4-
*     formula= ErF4-
      charge=  -1.0      ion size=  3.6 A      mole wt.=  243.2540 g
      2 species in reaction
      1.0000 Er+++           4.0000 F-           
      -14.2642    -13.2360    -12.1979    -11.3986
      -10.8458    -10.7331    -11.1012    -12.1591
*    References DGf or LogK 95haa/sho ; DHf n/a
*    S° 95haa/sho ; Cp 95haa/sho


ErH2PO4++
*     formula= ErH2PO4+2
      charge=  2.0      ion size=  5.7 A      mole wt.=  264.2470 g
      2 species in reaction
      1.0000 Er+++           1.0000 H2PO4-           
      -1.2758    -1.0365    -0.9532    -1.0521
      -1.3522    -1.7945    -2.3730    -3.1410
*    References DGf or LogK 95haa/sho ; DHf n/a
*    S° 95haa/sho ; Cp 95haa/sho


ErHCO3++
*     formula= ErHCO3+2
      charge=  2.0      ion size=  5.7 A      mole wt.=  228.2770 g
      2 species in reaction
      1.0000 HCO3-           1.0000 Er+++           
      -1.7897    -1.7890    -1.9762    -2.3205
      -2.8638    -3.5022    -4.2460    -5.1551
*    References DGf or LogK 95haa/sho ; DHf n/a
*    S° 95haa/sho ; Cp 95haa/sho


ErNO3++
*     formula= ErNO3+2
      charge=  2.0      ion size=  5.7 A      mole wt.=  229.2650 g
      2 species in reaction
      1.0000 Er+++           1.0000 NO3-           
      -0.7597    -0.1415    0.3953    0.7305
      0.8836    0.8266    0.5885    0.1335
*    References DGf or LogK 95haa/sho ; DHf n/a
*    S° 95haa/sho ; Cp 95haa/sho


ErO+
*     formula= ErO+
      charge=  1.0      ion size=  4.1 A      mole wt.=  183.2590 g
      3 species in reaction
      1.0000 Er+++           1.0000 H2O           -2.0000 H+           
      18.3140    15.9642    13.3742    11.1034
      8.9500    7.2932    5.9512    4.8017
*    References DGf or LogK 95haa/sho ; DHf n/a
*    S° 95haa/sho ; Cp 95haa/sho


ErO2-
*     formula= ErO2-
      charge=  -1.0      ion size=  3.6 A      mole wt.=  199.2590 g
      3 species in reaction
      1.0000 Er+++           2.0000 H2O           -4.0000 H+           
      36.6297    32.5882    28.1478    24.2843
      20.6806    17.9977    15.9505    14.3909
*    References DGf or LogK 95haa/sho ; DHf n/a
*    S° 95haa/sho ; Cp 95haa/sho


ErO2H(aq)
*     formula= ErO2H(aq)
      charge=  0.0      ion size=  3.4 A      mole wt.=  200.2670 g
      3 species in reaction
      1.0000 Er+++           2.0000 H2O           -3.0000 H+           
      27.8256    24.3053    20.5100    17.2693
      14.2958    12.0972    10.3872    8.9702
*    References DGf or LogK 95haa/sho ; DHf n/a
*    S° 95haa/sho ; Cp 95haa/sho


ErOH++
*     formula= ErOH+2
      charge=  2.0      ion size=  5.7 A      mole wt.=  184.2670 g
      3 species in reaction
      1.0000 Er+++           1.0000 H2O           -1.0000 H+           
      9.0078    7.7546    6.3281    5.0394
      3.7793    2.7788    1.9466    1.2228
*    References DGf or LogK 95haa/sho ; DHf n/a
*    S° 95haa/sho ; Cp 95haa/sho


ErSO4+
*     formula= ErSO4+
      charge=  1.0      ion size=  4.1 A      mole wt.=  263.3240 g
      2 species in reaction
      1.0000 Er+++           1.0000 SO4--           
      -3.3653    -3.6494    -4.0637    -4.5360
      -5.1512    -5.8458    -6.7039    -7.8902
*    References DGf or LogK 95haa/sho ; DHf n/a
*    S° 95haa/sho ; Cp 95haa/sho


EuCl+
*     formula= EuCl+
      charge=  1.0      ion size=  4.1 A      mole wt.=  187.4160 g
      2 species in reaction
      1.0000 Cl-           1.0000 Eu++           
      -0.2662    -0.3211    -0.5824    -1.0131
      -1.6661    -2.4148    -3.2694    -4.2979
*    References DGf or LogK 95haa/sho ; DHf n/a
*    S° 95haa/sho ; Cp 95haa/sho


EuCl++
*     formula= EuCl+2
      charge=  2.0      ion size=  5.7 A      mole wt.=  187.4160 g
      2 species in reaction
      1.0000 Cl-           1.0000 Eu+++           
      -0.1573    -0.3211    -0.6492    -1.0890
      -1.6984    -2.3694    -3.1273    -4.0444
*    References DGf or LogK 95haa/sho ; DHf n/a
*    S° 95haa/sho ; Cp 95haa/sho


EuCl2+
*     formula= EuCl2+
      charge=  1.0      ion size=  4.1 A      mole wt.=  222.8690 g
      2 species in reaction
      2.0000 Cl-           1.0000 Eu+++           
      0.2362    0.0175    -0.4277    -1.0376
      -1.9094    -2.9088    -4.0920    -5.6061
*    References DGf or LogK 95haa/sho ; DHf n/a
*    S° 95haa/sho ; Cp 95haa/sho


EuCl2(aq)
*     formula= EuCl2(aq)
      charge=  0.0      ion size=  3.4 A      mole wt.=  222.8690 g
      2 species in reaction
      2.0000 Cl-           1.0000 Eu++           
      -1.2846    -1.2286    -1.5229    -2.1387
      -3.1574    -4.3817    -5.8233    -7.6094
*    References DGf or LogK 95haa/sho ; DHf n/a
*    S° 95haa/sho ; Cp 95haa/sho


EuCl3(aq)
*     formula= EuCl3(aq)
      charge=  0.0      ion size=  3.4 A      mole wt.=  258.3210 g
      2 species in reaction
      3.0000 Cl-           1.0000 Eu+++           
      0.5464    0.4294    0.1328    -0.3277
      -1.0683    -2.0200    -3.2732    -5.0523
*    References DGf or LogK 95haa/sho ; DHf n/a
*    S° 95haa/sho ; Cp 95haa/sho


EuCl3-
*     formula= EuCl3-
      charge=  -1.0      ion size=  3.6 A      mole wt.=  258.3210 g
      2 species in reaction
      3.0000 Cl-           1.0000 Eu++           
      -2.2612    -1.9895    -2.1999    -2.8888
      -4.1405    -5.6904    -7.5179    -9.7409
*    References DGf or LogK 95haa/sho ; DHf n/a
*    S° 95haa/sho ; Cp 95haa/sho


EuCl4-
*     formula= EuCl4-
      charge=  -1.0      ion size=  3.6 A      mole wt.=  293.7740 g
      2 species in reaction
      4.0000 Cl-           1.0000 Eu+++           
      0.6697    0.8413    0.9891    1.0369
      0.9072    0.5355    -0.1635    -1.4068
*    References DGf or LogK 95haa/sho ; DHf n/a
*    S° 95haa/sho ; Cp 95haa/sho


EuCl4--
*     formula= EuCl4-2
      charge=  -2.0      ion size=  4.7 A      mole wt.=  293.7740 g
      2 species in reaction
      4.0000 Cl-           1.0000 Eu++           
      -3.4351    -2.8237    -2.8099    -3.4423
      -4.7901    -6.5397    -8.6210    -11.1193
*    References DGf or LogK 95haa/sho ; DHf n/a
*    S° 95haa/sho ; Cp 95haa/sho


EuCO3+
*     formula= EuCO3+
      charge=  1.0      ion size=  4.1 A      mole wt.=  211.9730 g
      3 species in reaction
      1.0000 HCO3-           1.0000 Eu+++           -1.0000 H+           
      2.3091    2.3891    2.5276    2.6895
      2.8588    2.9563    2.9338    2.6925
*    References DGf or LogK 95haa/sho ; DHf n/a
*    S° 95haa/sho ; Cp 95haa/sho


EuF+
*     formula= EuF+
      charge=  1.0      ion size=  4.1 A      mole wt.=  170.9620 g
      2 species in reaction
      1.0000 Eu++           1.0000 F-           
      1.5705    1.3822    0.9635    0.3913
      -0.3955    -1.2439    -2.1744    -3.2592
*    References DGf or LogK 95haa/sho ; DHf n/a
*    S° 95haa/sho ; Cp 95haa/sho


EuF++
*     formula= EuF+2
      charge=  2.0      ion size=  5.7 A      mole wt.=  170.9620 g
      2 species in reaction
      1.0000 Eu+++           1.0000 F-           
      -4.1667    -4.4818    -4.9871    -5.5886
      -6.3592    -7.1650    -8.0458    -9.0819
*    References DGf or LogK 95haa/sho ; DHf n/a
*    S° 95haa/sho ; Cp 95haa/sho


EuF2+
*     formula= EuF2+
      charge=  1.0      ion size=  4.1 A      mole wt.=  189.9610 g
      2 species in reaction
      1.0000 Eu+++           2.0000 F-           
      -7.6526    -7.7908    -8.1549    -8.6921
      -9.4943    -10.4471    -11.6099    -13.1320
*    References DGf or LogK 95haa/sho ; DHf n/a
*    S° 95haa/sho ; Cp 95haa/sho


EuF2(aq)
*     formula= EuF2(aq)
      charge=  0.0      ion size=  3.4 A      mole wt.=  189.9610 g
      2 species in reaction
      1.0000 Eu++           2.0000 F-           
      2.1579    2.0314    1.5163    0.6976
      -0.5231    -1.9157    -3.5115    -5.4502
*    References DGf or LogK 95haa/sho ; DHf n/a
*    S° 95haa/sho ; Cp 95haa/sho


EuF3(aq)
*     formula= EuF3(aq)
      charge=  0.0      ion size=  3.4 A      mole wt.=  208.9590 g
      2 species in reaction
      1.0000 Eu+++           3.0000 F-           
      -10.5170    -10.2935    -10.2217    -10.3528
      -10.7777    -11.4983    -12.5956    -14.2875
*    References DGf or LogK 95haa/sho ; DHf n/a
*    S° 95haa/sho ; Cp 95haa/sho


EuF3-
*     formula= EuF3-
      charge=  -1.0      ion size=  3.6 A      mole wt.=  208.9590 g
      2 species in reaction
      1.0000 Eu++           3.0000 F-           
      2.2877    2.4607    2.1128    1.2959
      -0.0725    -1.7007    -3.5755    -5.8124
*    References DGf or LogK 95haa/sho ; DHf n/a
*    S° 95haa/sho ; Cp 95haa/sho


EuF4-
*     formula= EuF4-
      charge=  -1.0      ion size=  3.6 A      mole wt.=  227.9580 g
      2 species in reaction
      1.0000 Eu+++           4.0000 F-           
      -13.1567    -12.2831    -11.3678    -10.6321
      -10.0922    -9.9485    -10.2579    -11.2344
*    References DGf or LogK 95haa/sho ; DHf n/a
*    S° 95haa/sho ; Cp 95haa/sho


EuF4--
*     formula= EuF4-2
      charge=  -2.0      ion size=  4.7 A      mole wt.=  227.9580 g
      2 species in reaction
      1.0000 Eu++           4.0000 F-           
      1.8311    2.7435    3.0625    2.7004
      1.6295    0.1187    -1.7469    -4.0463
*    References DGf or LogK 95haa/sho ; DHf n/a
*    S° 95haa/sho ; Cp 95haa/sho


EuH2PO4++
*     formula= EuH2PO4+2
      charge=  2.0      ion size=  5.7 A      mole wt.=  248.9510 g
      2 species in reaction
      1.0000 Eu+++           1.0000 H2PO4-           
      -1.2269    -1.0365    -1.0026    -1.1409
      -1.4741    -1.9380    -2.5309    -3.3081
*    References DGf or LogK 95haa/sho ; DHf n/a
*    S° 95haa/sho ; Cp 95haa/sho


EuHCO3++
*     formula= EuHCO3+2
      charge=  2.0      ion size=  5.7 A      mole wt.=  212.9810 g
      2 species in reaction
      1.0000 HCO3-           1.0000 Eu+++           
      -1.5849    -1.6424    -1.8898    -2.2834
      -2.8693    -3.5370    -4.3016    -5.2263
*    References DGf or LogK 95haa/sho ; DHf n/a
*    S° 95haa/sho ; Cp 95haa/sho


EuNO3++
*     formula= EuNO3+2
      charge=  2.0      ion size=  5.7 A      mole wt.=  213.9690 g
      2 species in reaction
      1.0000 Eu+++           1.0000 NO3-           
      -1.4628    -0.8745    -0.3652    -0.0495
      0.0894    0.0246    -0.2176    -0.6735
*    References DGf or LogK 95haa/sho ; DHf n/a
*    S° 95haa/sho ; Cp 95haa/sho


EuO+
*     formula= EuO+
      charge=  1.0      ion size=  4.1 A      mole wt.=  167.9630 g
      3 species in reaction
      1.0000 Eu+++           1.0000 H2O           -2.0000 H+           
      18.7558    16.3307    13.6676    11.3420
      9.1466    7.4662    6.1118    4.9550
*    References DGf or LogK 95haa/sho ; DHf n/a
*    S° 95haa/sho ; Cp 95haa/sho


EuO2-
*     formula= EuO2-
      charge=  -1.0      ion size=  3.6 A      mole wt.=  183.9630 g
      3 species in reaction
      1.0000 Eu+++           2.0000 H2O           -4.0000 H+           
      38.7801    34.4940    29.8059    25.7456
      21.9782    19.1900    17.0743    15.4659
*    References DGf or LogK 95haa/sho ; DHf n/a
*    S° 95haa/sho ; Cp 95haa/sho


EuO2H(aq)
*     formula= EuO2H(aq)
      charge=  0.0      ion size=  3.4 A      mole wt.=  184.9710 g
      3 species in reaction
      1.0000 Eu+++           2.0000 H2O           -3.0000 H+           
      29.0847    25.4048    21.4557    18.0981
      15.0304    12.7699    11.0094    9.5255
*    References DGf or LogK 95haa/sho ; DHf n/a
*    S° 95haa/sho ; Cp 95haa/sho


EuOH++
*     formula= EuOH+2
      charge=  2.0      ion size=  5.7 A      mole wt.=  168.9710 g
      3 species in reaction
      1.0000 Eu+++           1.0000 H2O           -1.0000 H+           
      9.1989    7.9012    6.4355    5.1217
      3.8479    2.8454    2.0183    1.3027
*    References DGf or LogK 95haa/sho ; DHf n/a
*    S° 95haa/sho ; Cp 95haa/sho


EuSO4+
*     formula= EuSO4+
      charge=  1.0      ion size=  4.1 A      mole wt.=  248.0280 g
      2 species in reaction
      1.0000 Eu+++           1.0000 SO4--           
      -3.4353    -3.7227    -4.1408    -4.6165
      -5.2356    -5.9341    -6.7967    -7.9890
*    References DGf or LogK 95haa/sho ; DHf n/a
*    S° 95haa/sho ; Cp 95haa/sho


Fe(CO3)2-
*     formula= Fe(CO3)2(-1)
      charge=  -1.0      ion size=  3.6 A      mole wt.=  175.8650 g
      3 species in reaction
      2.0000 HCO3-           1.0000 Fe+++           -2.0000 H+           
      1.0534    1.0534    1.0534    1.0534
      1.0534    1.0534    1.0534    1.0534
*    References DGf or LogK 04chi ; DHf n/a
*    S° n/a ; Cp n/a


Fe(CO3)2--
*     formula= Fe(CO3)2(-2)
      charge=  -2.0      ion size=  4.7 A      mole wt.=  175.8650 g
      3 species in reaction
      2.0000 HCO3-           1.0000 Fe++           -2.0000 H+           
      13.5716    13.6900    13.9670    14.3959
      14.9927    15.5508    15.9570    16.0350
*    References DGf or LogK 17bbla ; DHf n/a
*    S° 17bbla ; Cp n/a


Fe(HS)2(aq)
*     formula= Fe(HS)2(aq)
      charge=  0.0      ion size=  3.4 A      mole wt.=  121.9950 g
      2 species in reaction
      1.0000 Fe++           2.0000 HS-           
      -7.1110    -6.4500    -5.8598    -5.4939
      -5.3697    -5.5507    -6.0450    -6.9705
*    References DGf or LogK 99dav/phi ; DHf n/a
*    S° 17bbla ; Cp n/a


Fe(OH)4-
*     formula= Fe(OH)4(-)
      charge=  -1.0      ion size=  3.6 A      mole wt.=  123.8760 g
      3 species in reaction
      1.0000 Fe+++           4.0000 H2O           -4.0000 H+           
      23.9677    21.6041    18.9594    16.5536
      14.1510    12.1979    10.5565    9.1696
*    References DGf or LogK 76bae/mes ; DHf n/a
*    S° 99dia/sch ; Cp 99dia/sch


Fe2(OH)2++++
*     formula= Fe2(OH)2(+4)
      charge=  4.0      ion size=  11.6 A      mole wt.=  145.7090 g
      3 species in reaction
      2.0000 Fe+++           2.0000 H2O           -2.0000 H+           
      3.8404    2.9220    1.9118    1.0442
      0.2120    -0.4957    -1.2062    -2.0239
*    References DGf or LogK 07ste ; DHf 76bae/mes
*    S° n/a ; Cp n/a


FeAsO4
*     formula= FeAsO4
      charge=  0.0      ion size=  3.4 A      mole wt.=  194.7660 g
      3 species in reaction
      1.0000 H2AsO4-           1.0000 Fe+++           -2.0000 H+           
      5.1782    4.4266    3.7250    3.2136
      2.7982    2.4763    2.1226    1.6004
*    References DGf or LogK 07mar/acc ; DHf n/a
*    S° 07mar/acc ; Cp 07mar/acc


FeAsO4-
*     formula= FeAsO4-
      charge=  -1.0      ion size=  3.6 A      mole wt.=  194.7660 g
      3 species in reaction
      1.0000 H2AsO4-           1.0000 Fe++           -2.0000 H+           
      12.4146    10.9798    9.5060    8.3300
      7.3432    6.6885    6.2252    5.8547
*    References DGf or LogK 07mar/acc ; DHf n/a
*    S° 07mar/acc ; Cp 07mar/acc


FeCl+
*     formula= FeCl(+)
      charge=  1.0      ion size=  4.1 A      mole wt.=  91.2990 g
      2 species in reaction
      1.0000 Cl-           1.0000 Fe++           
      0.4519    0.1600    -0.3041    -0.8576
      -1.5663    -2.3036    -3.1041    -4.0470
*    References DGf or LogK 04chi ; DHf 17bbla
*    S° n/a ; Cp 97sve/sho


FeCl++
*     formula= FeCl(2)
      charge=  2.0      ion size=  5.7 A      mole wt.=  91.2990 g
      2 species in reaction
      1.0000 Cl-           1.0000 Fe+++           
      -1.2065    -1.5200    -1.9935    -2.5429
      -3.2367    -3.9558    -4.7389    -5.6660
*    References DGf or LogK 00tag/dia ; DHf 17bbla
*    S° n/a ; Cp 97sve/sho


FeCl2+
*     formula= FeCl2(1)
      charge=  1.0      ion size=  4.1 A      mole wt.=  126.7520 g
      2 species in reaction
      2.0000 Cl-           1.0000 Fe+++           
      -0.3982    -0.7000    -1.1723    -1.7326
      -2.4801    -3.3298    -4.3696    -5.7683
*    References DGf or LogK 17bbla ; DHf 17bbla
*    S° n/a ; Cp n/a


FeCl2(aq)
*     formula= FeCl2(0)
      charge=  0.0      ion size=  3.4 A      mole wt.=  126.7520 g
      2 species in reaction
      2.0000 Cl-           1.0000 Fe++           
      1.8111    1.7400    1.4462    0.9592
      0.1942    -0.7311    -1.8611    -3.3398
*    References DGf or LogK 17bbla ; DHf 17bbla
*    S° n/a ; Cp 97sve/sho


FeCO3+
*     formula= FeCO3(+1)
      charge=  1.0      ion size=  4.1 A      mole wt.=  115.8560 g
      3 species in reaction
      1.0000 HCO3-           1.0000 Fe+++           -1.0000 H+           
      -0.2159    0.6067    1.4956    2.2512
      2.8968    3.2601    3.3445    3.0925
*    References DGf or LogK 04chi ; DHf n/a
*    S° 04chi ; Cp n/a


FeCO3(aq)
*     formula= FeCO3(0)
      charge=  0.0      ion size=  3.4 A      mole wt.=  115.8560 g
      3 species in reaction
      1.0000 HCO3-           1.0000 Fe++           -1.0000 H+           
      5.3672    5.1400    4.8784    4.6474
      4.4080    4.1649    3.8522    3.3686
*    References DGf or LogK 17bbla ; DHf 17bbla
*    S° n/a ; Cp n/a


FeCO3OH-
*     formula= FeCO3OH(-1)
      charge=  -1.0      ion size=  3.6 A      mole wt.=  132.8630 g
      4 species in reaction
      1.0000 HCO3-           1.0000 Fe++           1.0000 H2O
      -2.0000 H+           
      14.3577    14.3577    14.3577    14.3577
      14.3577    14.3577    14.3577    14.3577
*    References DGf or LogK 04chi ; DHf n/a
*    S° n/a ; Cp n/a


FeCrO4+
*     formula= FeCrO4+
      charge=  1.0      ion size=  4.1 A      mole wt.=  171.8110 g
      2 species in reaction
      1.0000 CrO4--           1.0000 Fe+++           
      -7.5691    -7.8000    -8.2415    -8.8197
      -9.6331    -10.5757    -11.7235    -13.2389
*    References DGf or LogK 96bbar/pal ; DHf 96bbar/pal
*    S° n/a ; Cp n/a


FeF+
*     formula= FeF(1)
      charge=  1.0      ion size=  4.1 A      mole wt.=  74.8450 g
      2 species in reaction
      1.0000 F-           1.0000 Fe++           
      -1.4803    -1.4300    -1.4965    -1.6773
      -2.0074    -2.4374    -2.9856    -3.7226
*    References DGf or LogK 04chi ; DHf n/a
*    S° 04chi ; Cp 97sve/sho


FeF++
*     formula= FeF(2)
      charge=  2.0      ion size=  5.7 A      mole wt.=  74.8450 g
      2 species in reaction
      1.0000 F-           1.0000 Fe+++           
      -5.7154    -6.0000    -6.4441    -6.9672
      -7.6395    -8.3523    -9.1476    -10.1041
*    References DGf or LogK 04chi ; DHf n/a
*    S° 04chi ; Cp 97sve/sho


FeH2AsO3++
*     formula= FeH2AsO3+2
      charge=  2.0      ion size=  5.7 A      mole wt.=  180.7830 g
      2 species in reaction
      1.0000 H2AsO3-           1.0000 Fe+++           
      -8.2451    -7.4854    -6.6114    -5.7942
      -4.9764    -4.3456    -3.8931    -3.6512
*    References DGf or LogK 07mar/acc ; DHf n/a
*    S° 07mar/acc ; Cp 07mar/acc


FeH2AsO4+
*     formula= FeH2AsO4+
      charge=  1.0      ion size=  4.1 A      mole wt.=  196.7820 g
      2 species in reaction
      1.0000 H2AsO4-           1.0000 Fe++           
      -3.3348    -2.9656    -2.6399    -2.4294
      -2.3313    -2.3809    -2.5796    -2.9809
*    References DGf or LogK 07mar/acc ; DHf n/a
*    S° 07mar/acc ; Cp 07mar/acc


FeH2AsO4++
*     formula= FeH2AsO4+2
      charge=  2.0      ion size=  5.7 A      mole wt.=  196.7820 g
      2 species in reaction
      1.0000 H2AsO4-           1.0000 Fe+++           
      -4.9226    -4.4332    -3.9949    -3.6917
      -3.5048    -3.4822    -3.6187    -3.9625
*    References DGf or LogK 07mar/acc ; DHf n/a
*    S° 07mar/acc ; Cp 07mar/acc


FeH2PO4+
*     formula= FeH2PO4+
      charge=  1.0      ion size=  4.1 A      mole wt.=  152.8340 g
      2 species in reaction
      1.0000 Fe++           1.0000 H2PO4-           
      -2.6935    -2.6935    -2.6935    -2.6935
      -2.6935    -2.6935    -2.6935    -2.6935
*    References DGf or LogK 72bnri, 76smi/mar ; DHf n/a
*    S° n/a ; Cp n/a


FeH2PO4++
*     formula= FeH2PO4+2
      charge=  2.0      ion size=  5.7 A      mole wt.=  152.8340 g
      2 species in reaction
      1.0000 Fe+++           1.0000 H2PO4-           
      -5.4235    -5.4235    -5.4235    -5.4235
      -5.4235    -5.4235    -5.4235    -5.4235
*    References DGf or LogK 72cnri ; DHf n/a
*    S° n/a ; Cp n/a


FeHAsO4
*     formula= FeHAsO4
      charge=  0.0      ion size=  3.4 A      mole wt.=  195.7740 g
      3 species in reaction
      1.0000 H2AsO4-           1.0000 Fe++           -1.0000 H+           
      3.4963    3.4350    3.3631    3.2877
      3.1720    2.9974    2.7149    2.2336
*    References DGf or LogK 07mar/acc ; DHf n/a
*    S° 07mar/acc ; Cp 07mar/acc


FeHAsO4+
*     formula= FeHAsO4+
      charge=  1.0      ion size=  4.1 A      mole wt.=  195.7740 g
      3 species in reaction
      1.0000 H2AsO4-           1.0000 Fe+++           -1.0000 H+           
      -3.3290    -3.1424    -2.8665    -2.5560
      -2.2133    -1.9576    -1.8363    -1.9362
*    References DGf or LogK 07mar/acc ; DHf n/a
*    S° 07mar/acc ; Cp 07mar/acc


FeHCO3+
*     formula= FeHCO3(+1)
      charge=  1.0      ion size=  4.1 A      mole wt.=  116.8640 g
      2 species in reaction
      1.0000 HCO3-           1.0000 Fe++           
      -1.3976    -1.4400    -1.5215    -1.6248
      -1.7819    -1.9982    -2.3203    -2.8373
*    References DGf or LogK 04chi ; DHf n/a
*    S° 04chi ; Cp n/a


FeHPO4+
*     formula= FeHPO4+
      charge=  1.0      ion size=  4.1 A      mole wt.=  151.8260 g
      3 species in reaction
      1.0000 Fe+++           1.0000 H2PO4-           -1.0000 H+           
      -4.1733    -3.6745    -3.1538    -2.7315
      -2.4117    -2.3041    -2.4269    -2.8517
*    References DGf or LogK 65lah ; DHf n/a
*    S° 65lah ; Cp n/a


FeHPO4(aq)
*     formula= FeHPO4(0)
      charge=  0.0      ion size=  3.4 A      mole wt.=  151.8260 g
      3 species in reaction
      1.0000 Fe++           1.0000 H2PO4-           -1.0000 H+           
      3.6075    3.6075    3.6075    3.6075
      3.6075    3.6075    3.6075    3.6075
*    References DGf or LogK 72bnri ; DHf n/a
*    S° n/a ; Cp n/a


FeHSO4+
*     formula= FeHSO4(+1)
      charge=  1.0      ion size=  4.1 A      mole wt.=  152.9190 g
      3 species in reaction
      1.0000 Fe++           1.0000 SO4--           1.0000 H+           
      -1.6836    -1.7400    -2.0509    -2.5831
      -3.4253    -4.4416    -5.6730    -7.2612
*    References DGf or LogK 17bbla ; DHf 17bbla
*    S° n/a ; Cp n/a


FeHSO4++
*     formula= FeHSO4(+2)
      charge=  2.0      ion size=  5.7 A      mole wt.=  152.9190 g
      3 species in reaction
      1.0000 Fe+++           1.0000 SO4--           1.0000 H+           
      -1.3364    -2.4800    -3.9344    -5.3923
      -7.0166    -8.5513    -10.1419    -11.9960
*    References DGf or LogK 08bla ; DHf n/a
*    S° 17bbla ; Cp n/a


FeO(aq)
*     formula= FeO(+0)
      charge=  0.0      ion size=  3.4 A      mole wt.=  71.8460 g
      3 species in reaction
      1.0000 Fe++           1.0000 H2O           -2.0000 H+           
      22.5297    20.6010    18.4130    16.4393
      14.5091    12.9750    11.6926    10.5557
*    References DGf or LogK 04chi ; DHf 76bae/mes
*    S° n/a ; Cp 97asho/sas


FeO+
*     formula= FeO(+1)
      charge=  1.0      ion size=  4.1 A      mole wt.=  71.8460 g
      3 species in reaction
      1.0000 Fe+++           1.0000 H2O           -2.0000 H+           
      6.8065    5.4828    4.0758    2.8902
      1.8071    0.9944    0.3321    -0.2615
*    References DGf or LogK n/a ; DHf 97asho/sas
*    S° 97asho/sas ; Cp 97asho/sas


FeOH+
*     formula= FeOH(+1)
      charge=  1.0      ion size=  4.1 A      mole wt.=  72.8540 g
      3 species in reaction
      1.0000 Fe++           1.0000 H2O           -1.0000 H+           
      10.3808    9.5010    8.4812    7.5470
      6.6213    5.8768    5.2485    4.6879
*    References DGf or LogK 76bae/mes ; DHf 76bae/mes
*    S° n/a ; Cp 97asho/sas


FeOH++
*     formula= FeOH(+2)
      charge=  2.0      ion size=  5.7 A      mole wt.=  72.8540 g
      3 species in reaction
      1.0000 Fe+++           1.0000 H2O           -1.0000 H+           
      2.7738    2.1910    1.5416    0.9693
      0.4193    -0.0183    -0.3951    -0.7445
*    References DGf or LogK 76bae/mes ; DHf n/a
*    S° 97asho/sas ; Cp 97asho/sas


FePO4-
*     formula= FePO4-
      charge=  -1.0      ion size=  3.6 A      mole wt.=  150.8180 g
      3 species in reaction
      1.0000 Fe++           1.0000 H2PO4-           -2.0000 H+           
      11.6262    11.6262    11.6262    11.6262
      11.6262    11.6262    11.6262    11.6262
*    References DGf or LogK 79mat/spo ; DHf n/a
*    S° n/a ; Cp n/a


FeSO4+
*     formula= FeSO4(1)
      charge=  1.0      ion size=  4.1 A      mole wt.=  151.9110 g
      2 species in reaction
      1.0000 Fe+++           1.0000 SO4--           
      -3.8541    -4.2500    -4.7338    -5.1763
      -5.6495    -6.1421    -6.7813    -7.7603
*    References DGf or LogK 17bbla ; DHf 17bbla
*    S° n/a ; Cp n/a


FeSO4(aq)
*     formula= FeSO4(0)
      charge=  0.0      ion size=  3.4 A      mole wt.=  151.9110 g
      2 species in reaction
      1.0000 Fe++           1.0000 SO4--           
      -2.3585    -2.4400    -2.6493    -2.9388
      -3.3658    -3.8989    -4.6132    -5.6706
*    References DGf or LogK 17bbla ; DHf 17bbla
*    S° n/a ; Cp n/a


Ga(OH)2+
*     formula= Ga(OH)2(1)
      charge=  1.0      ion size=  4.5 A      mole wt.=  103.7380 g
      3 species in reaction
      1.0000 Ga+++           2.0000 H2O           -2.0000 H+           
      8.4968    7.2703    5.9559    4.9063
      4.0991    3.7253    3.7426    4.2540
*    References DGf or LogK 97ben/dia ; DHf n/a
*    S° 97ben/dia ; Cp 97ben/dia


Ga(OH)3(aq)
*     formula= Ga(OH)3(0)
      charge=  0.0      ion size=  3.0 A      mole wt.=  120.7450 g
      3 species in reaction
      1.0000 Ga+++           3.0000 H2O           -3.0000 H+           
      13.6434    11.9243    10.0668    8.5521
      7.3273    6.6626    6.4793    6.8588
*    References DGf or LogK 97ben/dia ; DHf n/a
*    S° 97ben/dia ; Cp 97ben/dia


Ga(OH)4-
*     formula= Ga(OH)4(-1)
      charge=  -1.0      ion size=  4.5 A      mole wt.=  137.7520 g
      3 species in reaction
      1.0000 Ga+++           4.0000 H2O           -4.0000 H+           
      17.3905    15.6328    13.7718    12.2977
      11.1732    10.6606    10.6955    11.4106
*    References DGf or LogK 99dia/sch ; DHf n/a
*    S° 99dia/sch ; Cp 99dia/sch


GaOH++
*     formula= GaOH(+2)
      charge=  2.0      ion size=  4.5 A      mole wt.=  86.7300 g
      3 species in reaction
      1.0000 Ga+++           1.0000 H2O           -1.0000 H+           
      4.3221    2.8362    1.1311    -0.3928
      -1.8345    -2.9107    -3.7269    -4.3604
*    References DGf or LogK 97ben/dia ; DHf n/a
*    S° 97ben/dia ; Cp 97ben/dia


GdCl++
*     formula= GdCl+2
      charge=  2.0      ion size=  5.7 A      mole wt.=  192.7020 g
      2 species in reaction
      1.0000 Cl-           1.0000 Gd+++           
      0.2667    0.0534    -0.3334    -0.8290
      -1.4965    -2.2172    -3.0194    -3.9768
*    References DGf or LogK 95haa/sho ; DHf n/a
*    S° 95haa/sho ; Cp 95haa/sho


GdCl2+
*     formula= GdCl2+
      charge=  1.0      ion size=  4.1 A      mole wt.=  228.1550 g
      2 species in reaction
      2.0000 Cl-           1.0000 Gd+++           
      0.6808    0.3920    -0.1389    -0.8324
      -1.7933    -2.8701    -4.1230    -5.7011
*    References DGf or LogK 95haa/sho ; DHf n/a
*    S° 95haa/sho ; Cp 95haa/sho


GdCl3(aq)
*     formula= GdCl3(aq)
      charge=  0.0      ion size=  3.4 A      mole wt.=  263.6070 g
      2 species in reaction
      3.0000 Cl-           1.0000 Gd+++           
      1.0248    0.8039    0.3777    -0.2103
      -1.0861    -2.1526    -3.5052    -5.3716
*    References DGf or LogK 95haa/sho ; DHf n/a
*    S° 95haa/sho ; Cp 95haa/sho


GdCl4-
*     formula= GdCl4-
      charge=  -1.0      ion size=  3.6 A      mole wt.=  299.0600 g
      2 species in reaction
      4.0000 Cl-           1.0000 Gd+++           
      1.2016    1.2158    1.1666    1.0189
      0.6785    0.1229    -0.7415    -2.1364
*    References DGf or LogK 95haa/sho ; DHf n/a
*    S° 95haa/sho ; Cp 95haa/sho


GdCO3+
*     formula= GdCO3+
      charge=  1.0      ion size=  4.1 A      mole wt.=  217.2590 g
      3 species in reaction
      1.0000 HCO3-           1.0000 Gd+++           -1.0000 H+           
      2.8140    2.8369    2.9100    3.0117
      3.1205    3.1678    3.1023    2.8258
*    References DGf or LogK 95haa/sho ; DHf n/a
*    S° 95haa/sho ; Cp 95haa/sho


GdF++
*     formula= GdF+2
      charge=  2.0      ion size=  5.7 A      mole wt.=  176.2480 g
      2 species in reaction
      1.0000 F-           1.0000 Gd+++           
      -3.9427    -4.2539    -4.7566    -5.3577
      -6.1306    -6.9411    -7.8286    -8.8730
*    References DGf or LogK 95haa/sho ; DHf n/a
*    S° 95haa/sho ; Cp 95haa/sho


GdF2+
*     formula= GdF2+
      charge=  1.0      ion size=  4.1 A      mole wt.=  195.2470 g
      2 species in reaction
      2.0000 F-           1.0000 Gd+++           
      -7.5122    -7.6362    -7.9895    -8.5218
      -9.3249    -10.2838    -11.4563    -12.9902
*    References DGf or LogK 95haa/sho ; DHf n/a
*    S° 95haa/sho ; Cp 95haa/sho


GdF3(aq)
*     formula= GdF3(aq)
      charge=  0.0      ion size=  3.4 A      mole wt.=  214.2450 g
      2 species in reaction
      3.0000 F-           1.0000 Gd+++           
      -10.4447    -10.2122    -10.1404    -10.2807
      -10.7245    -11.4681    -12.5905    -14.3083
*    References DGf or LogK 95haa/sho ; DHf n/a
*    S° 95haa/sho ; Cp 95haa/sho


GdF4-
*     formula= GdF4-
      charge=  -1.0      ion size=  3.6 A      mole wt.=  233.2440 g
      2 species in reaction
      4.0000 F-           1.0000 Gd+++           
      -13.1230    -12.2751    -11.4058    -10.7275
      -10.2608    -10.1899    -10.5704    -11.6126
*    References DGf or LogK 95haa/sho ; DHf n/a
*    S° 95haa/sho ; Cp 95haa/sho


GdH2PO4++
*     formula= GdH2PO4+2
      charge=  2.0      ion size=  5.7 A      mole wt.=  254.2370 g
      2 species in reaction
      1.0000 Gd+++           1.0000 H2PO4-           
      -0.7829    -0.6620    -0.7098    -0.9249
      -1.3371    -1.8676    -2.5189    -3.3482
*    References DGf or LogK 95haa/sho ; DHf n/a
*    S° 95haa/sho ; Cp 95haa/sho


GdHCO3++
*     formula= GdHCO3+2
      charge=  2.0      ion size=  5.7 A      mole wt.=  218.2670 g
      2 species in reaction
      1.0000 HCO3-           1.0000 Gd+++           
      -1.2228    -1.3412    -1.6603    -2.1216
      -2.7776    -3.5049    -4.3226    -5.2960
*    References DGf or LogK 95haa/sho ; DHf n/a
*    S° 95haa/sho ; Cp 95haa/sho


GdNO3++
*     formula= GdNO3+2
      charge=  2.0      ion size=  5.7 A      mole wt.=  219.2550 g
      2 species in reaction
      1.0000 Gd+++           1.0000 NO3-           
      -0.5067    -0.0602    0.2845    0.4475
      0.4322    0.2407    -0.1094    -0.6587
*    References DGf or LogK 95haa/sho ; DHf n/a
*    S° 95haa/sho ; Cp 95haa/sho


GdO+
*     formula= GdO+
      charge=  1.0      ion size=  4.1 A      mole wt.=  173.2490 g
      3 species in reaction
      1.0000 Gd+++           1.0000 H2O           -2.0000 H+           
      19.2034    16.7052    13.9741    11.6001
      9.3701    7.6717    6.3081    5.1460
*    References DGf or LogK 95haa/sho ; DHf n/a
*    S° 95haa/sho ; Cp 95haa/sho


GdO2-
*     formula= GdO2-
      charge=  -1.0      ion size=  3.6 A      mole wt.=  189.2490 g
      3 species in reaction
      1.0000 Gd+++           2.0000 H2O           -4.0000 H+           
      39.1702    34.7952    30.0360    25.9378
      22.1596    19.3829    17.2894    15.7048
*    References DGf or LogK 95haa/sho ; DHf n/a
*    S° 95haa/sho ; Cp 95haa/sho


GdO2H(aq)
*     formula= GdO2H(aq)
      charge=  0.0      ion size=  3.4 A      mole wt.=  190.2570 g
      3 species in reaction
      1.0000 Gd+++           2.0000 H2O           -3.0000 H+           
      29.3888    25.6326    21.6330    18.2653
      15.2294    13.0350    11.3712    10.0273
*    References DGf or LogK 95haa/sho ; DHf n/a
*    S° 95haa/sho ; Cp 95haa/sho


GdOH++
*     formula= GdOH+2
      charge=  2.0      ion size=  5.7 A      mole wt.=  174.2570 g
      3 species in reaction
      1.0000 Gd+++           1.0000 H2O           -1.0000 H+           
      9.6401    8.2757    6.7483    5.3909
      4.0859    3.0674    2.2321    1.5126
*    References DGf or LogK 95haa/sho ; DHf n/a
*    S° 95haa/sho ; Cp 95haa/sho


GdSO4+
*     formula= GdSO4+
      charge=  1.0      ion size=  4.1 A      mole wt.=  253.3140 g
      2 species in reaction
      1.0000 Gd+++           1.0000 SO4--           
      -3.0365    -3.3482    -3.7941    -4.2956
      -4.9411    -5.6623    -6.5457    -7.7572
*    References DGf or LogK 95haa/sho ; DHf n/a
*    S° 95haa/sho ; Cp 95haa/sho


GeO(OH)3-
*     formula= GeO(OH)3(-1)
      charge=  -1.0      ion size=  4.5 A      mole wt.=  139.6310 g
      2 species in reaction
      1.0000 Ge(OH)4(aq)           -1.0000 H+           
      9.7710    9.3091    8.8502    8.5355
      8.3690    8.3880    8.5613    8.9090
*    References DGf or LogK 98pok/sch ; DHf n/a
*    S° 98pok/sch ; Cp 98pok/sch


H2As3S6-
*     formula= H2As3S6-
      charge=  -1.0      ion size=  3.6 A      mole wt.=  419.1770 g
      4 species in reaction
      3.0000 H2AsO3-           6.0000 HS-           8.0000 H+
      -9.0000 H2O           
      -109.2142    -100.8957    -91.9586    -84.4560
      -77.9354    -73.7578    -71.5280    -71.3989
*    References DGf or LogK 05bes/app ; DHf n/a
*    S° 05bes/app ; Cp 05bes/app


H2CrO4(aq)
*     formula= H2CrO4(aq)
      charge=  0.0      ion size=  3.4 A      mole wt.=  117.9790 g
      2 species in reaction
      1.0000 CrO4--           2.0000 H+           
      -5.7441    -6.3200    -7.1194    -7.9830
      -9.0073    -10.0190    -11.0960    -12.3899
*    References DGf or LogK 04chi ; DHf n/a
*    S° 04chi ; Cp n/a


H2N2O2
*     formula= H2N2O2
      charge=  0.0      ion size=  3.4 A      mole wt.=  62.0280 g
      4 species in reaction
      0.6667 N2(aq)           0.6667 NO2-           0.6667 H2O
      0.6667 H+           
      39.0159    35.6396    31.7541    28.1996
      24.6863    21.8831    19.5531    17.4971
*    References DGf or LogK 97asho/sas ; DHf n/a
*    S° 97asho/sas ; Cp 97asho/sas


H2P2O7--
*     formula= H2P2O7(-2)
      charge=  -2.0      ion size=  4.7 A      mole wt.=  175.9590 g
      2 species in reaction
      2.0000 H2PO4-           -1.0000 H2O           
      2.1021    1.7594    1.2520    0.6854
      0.0196    -0.5962    -1.1661    -1.6956
*    References DGf or LogK 92gre/fug ; DHf n/a
*    S° 97asho/sas ; Cp 97asho/sas


H2PO3F(aq)
*     formula= H2PO3F(0)
      charge=  0.0      ion size=  3.4 A      mole wt.=  99.9860 g
      4 species in reaction
      1.0000 F-           1.0000 H2PO4-           2.0000 H+
      -1.0000 H2O           
      -3.7254    -3.7254    -3.7254    -3.7254
      -3.7254    -3.7254    -3.7254    -3.7254
*    References DGf or LogK 82wag/eva ; DHf n/a
*    S° n/a ; Cp n/a


H2S(aq)
*     formula= H2S(0)
      charge=  0.0      ion size=  3.4 A      mole wt.=  34.0820 g
      2 species in reaction
      1.0000 HS-           1.0000 H+           
      -7.4079    -6.9885    -6.6546    -6.4922
      -6.5014    -6.6815    -7.0154    -7.5513
*    References DGf or LogK n/a ; DHf 89cox/wag
*    S° 89cox/wag ; Cp 89bsho/hel, 01sch/sho


H2S2O3(aq)
*     formula= H2S2O3(0)
      charge=  0.0      ion size=  3.4 A      mole wt.=  114.1460 g
      2 species in reaction
      1.0000 S2O3--           2.0000 H+           
      -2.0311    -2.3200    -2.8403    -3.5045
      -4.3984    -5.3703    -6.4765    -7.8726
*    References DGf or LogK 04chi ; DHf n/a
*    S° 97asho/sas ; Cp 97asho/sas


H2S2O4(aq)
*     formula= H2S2O4(0)
      charge=  0.0      ion size=  3.4 A      mole wt.=  130.1450 g
      2 species in reaction
      1.0000 S2O4--           2.0000 H+           
      -2.5574    -2.8000    -3.2733    -3.9002
      -4.7624    -5.7135    -6.8066    -8.1995
*    References DGf or LogK 04chi ; DHf n/a
*    S° 97asho/sas ; Cp 97asho/sas


H2Sb2S4(aq)
*     formula= H2Sb2S4(0)
      charge=  0.0      ion size=  3.4 A      mole wt.=  373.8000 g
      4 species in reaction
      4.0000 HS-           2.0000 Sb(OH)3(aq)           4.0000 H+
      -6.0000 H2O           
      -63.1425    -58.0891    -52.5915    -47.9146
      -43.7733    -41.0274    -39.4241    -39.0072
*    References DGf or LogK 05bes/app ; DHf n/a
*    S° 05bes/app ; Cp 05bes/app


H2SeO3(aq)
*     formula= H2SeO3(0)
      charge=  0.0      ion size=  3.4 A      mole wt.=  128.9740 g
      2 species in reaction
      1.0000 SeO3--           2.0000 H+           
      -9.9189    -9.8589    -10.0052    -10.3535
      -10.9647    -11.7409    -12.7142    -14.0294
*    References DGf or LogK 97asho/sas ; DHf n/a
*    S° 97asho/sas ; Cp 97asho/sas


H2SiO4--
*     formula= H2SiO4(-2)
      charge=  -2.0      ion size=  4.7 A      mole wt.=  94.0990 g
      2 species in reaction
      1.0000 H4SiO4(aq)           -2.0000 H+           
      24.5226    23.2700    21.9960    21.0806
      20.4980    20.3282    20.4231    20.6828
*    References DGf or LogK 01fel/cho ; DHf 92gre/fug
*    S° n/a ; Cp n/a


H2SO3(aq)
*     formula= H2SO3(0)
      charge=  0.0      ion size=  3.4 A      mole wt.=  82.0800 g
      2 species in reaction
      1.0000 SO3--           2.0000 H+           
      -8.8050    -9.0300    -9.5849    -10.4064
      -11.6039    -12.9455    -14.4494    -16.2317
*    References DGf or LogK 04chi ; DHf n/a
*    S° 04chi ; Cp n/a


H2VO4-
*     formula= H2VO4(-)
      charge=  -1.0      ion size=  3.6 A      mole wt.=  116.9550 g
      3 species in reaction
      1.0000 VO2+           2.0000 H2O           -2.0000 H+           
      7.8308    7.0871    6.2013    5.3882
      4.6042    4.0196    3.6028    3.3712
*    References DGf or LogK 97asho/sas ; DHf n/a
*    S° 97asho/sas ; Cp 97asho/sas


H3As3S6(aq)
*     formula= H3As3S6(0)
      charge=  0.0      ion size=  3.4 A      mole wt.=  420.1850 g
      4 species in reaction
      3.0000 H2AsO3-           6.0000 HS-           9.0000 H+
      -9.0000 H2O           
      -113.0680    -104.4757    -95.2062    -87.3851
      -80.5383    -76.0956    -73.6488    -73.3412
*    References DGf or LogK 05bes/app ; DHf n/a
*    S° 05bes/app ; Cp 05bes/app


H3AsO4
*     formula= H3AsO4
      charge=  0.0      ion size=  3.4 A      mole wt.=  141.9430 g
      2 species in reaction
      1.0000 H2AsO4-           1.0000 H+           
      -2.1410    -2.3017    -2.5424    -2.8532
      -3.2882    -3.7674    -4.2970    -4.9140
*    References DGf or LogK 08per/pok ; DHf n/a
*    S° 08per/pok ; Cp 08per/pok


H3P2O7-
*     formula= H3P2O7(-)
      charge=  -1.0      ion size=  3.6 A      mole wt.=  176.9670 g
      3 species in reaction
      2.0000 H2PO4-           1.0000 H+           -1.0000 H2O           
      -0.1307    -0.4906    -1.0599    -1.7319
      -2.5756    -3.4291    -4.3254    -5.3483
*    References DGf or LogK 92gre/fug ; DHf n/a
*    S° 97asho/sas ; Cp 97asho/sas


H3PO2
*     formula= H3PO2
      charge=  0.0      ion size=  3.4 A      mole wt.=  65.9960 g
      2 species in reaction
      1.0000 H2PO2-           1.0000 H+           
      -1.9119    -1.9691    -2.0805    -2.2323
      -2.4532    -2.7174    -3.0530    -3.5366
*    References DGf or LogK n/a ; DHf 97asho/sas
*    S° 97asho/sas ; Cp 97asho/sas


H3PO3
*     formula= H3PO3
      charge=  0.0      ion size=  3.4 A      mole wt.=  81.9960 g
      2 species in reaction
      1.0000 H2PO3-           1.0000 H+           
      -1.7189    -1.7771    -1.8862    -2.0329
      -2.2458    -2.5018    -2.8310    -3.3147
*    References DGf or LogK n/a ; DHf 97asho/sas
*    S° 97asho/sas ; Cp 97asho/sas


H3PO4(aq)
*     formula= H3PO4(0)
      charge=  0.0      ion size=  3.4 A      mole wt.=  97.9950 g
      2 species in reaction
      1.0000 H2PO4-           1.0000 H+           
      -2.0319    -2.1400    -2.3315    -2.5762
      -2.9091    -3.2793    -3.7151    -4.2946
*    References DGf or LogK 92gre/fug ; DHf 92gre/fug
*    S° n/a ; Cp 89bsho/hel


H3VO4(aq)
*     formula= H3VO4(0)
      charge=  0.0      ion size=  3.4 A      mole wt.=  117.9630 g
      3 species in reaction
      1.0000 VO2+           2.0000 H2O           -1.0000 H+           
      3.8427    3.2681    2.6174    2.0465
      1.5105    1.0997    0.7562    0.4254
*    References DGf or LogK 97asho/sas ; DHf n/a
*    S° 97asho/sas ; Cp 97asho/sas


H4P2O7
*     formula= H4P2O7
      charge=  0.0      ion size=  3.4 A      mole wt.=  177.9750 g
      3 species in reaction
      2.0000 H2PO4-           2.0000 H+           -1.0000 H2O           
      -0.9470    -1.4906    -2.3172    -3.2749
      -4.4725    -5.6978    -7.0242    -8.6307
*    References DGf or LogK 92gre/fug ; DHf 92gre/fug
*    S° n/a ; Cp 97asho/sas


HAlO2(aq)
*     formula= HAlO2(0)
      charge=  0.0      ion size=  3.4 A      mole wt.=  59.9880 g
      3 species in reaction
      1.0000 Al+++           2.0000 H2O           -3.0000 H+           
      18.7071    16.4220    13.7178    11.1682
      8.5496    6.3585    4.4478    2.7302
*    References DGf or LogK 95pok/hel ; DHf n/a
*    S° 95pok/hel ; Cp 95pok/hel


HAs3S6--
*     formula= HAs3S6(-2)
      charge=  -2.0      ion size=  4.7 A      mole wt.=  418.1690 g
      4 species in reaction
      3.0000 H2AsO3-           6.0000 HS-           7.0000 H+
      -9.0000 H2O           
      -100.8444    -92.9888    -84.5334    -77.4147
      -71.1896    -67.1370    -64.8551    -64.4096
*    References DGf or LogK 05bes/app ; DHf n/a
*    S° 05bes/app ; Cp 05bes/app


HAsO4--
*     formula= HAsO4(-2)
      charge=  -2.0      ion size=  4.7 A      mole wt.=  139.9270 g
      2 species in reaction
      1.0000 H2AsO4-           -1.0000 H+           
      7.0721    6.9600    6.9353    7.0182
      7.2350    7.5564    7.9932    8.6069
*    References DGf or LogK 76bae/mes ; DHf n/a
*    S° 97asho/sas ; Cp 97asho/sas


HBeO2-
*     formula= HBeO2(-)
      charge=  -1.0      ion size=  3.6 A      mole wt.=  42.0190 g
      3 species in reaction
      1.0000 Be++           2.0000 H2O           -3.0000 H+           
      24.6505    23.2424    21.5751    20.0319
      18.5140    17.3383    16.4330    15.7811
*    References DGf or LogK 97asho/sas ; DHf n/a
*    S° 97asho/sas ; Cp 97asho/sas


HBr(aq)
*     formula= HBr(0)
      charge=  0.0      ion size=  3.4 A      mole wt.=  80.9120 g
      2 species in reaction
      1.0000 Br-           1.0000 H+           
      9.7264    8.6000    7.1724    5.7141
      4.0958    2.6594    1.3762    0.2490
*    References DGf or LogK 12liu/bor ; DHf 18las/bla
*    S° n/a ; Cp 18las/bla


HBrO(aq)
*     formula= HBrO(0)
      charge=  0.0      ion size=  3.4 A      mole wt.=  96.9110 g
      2 species in reaction
      1.0000 BrO-           1.0000 H+           
      -8.9130    -8.5761    -8.2714    -8.0766
      -7.9924    -8.0481    -8.2422    -8.6328
*    References DGf or LogK 97asho/sas ; DHf n/a
*    S° 97asho/sas ; Cp 97asho/sas


HCdO2-
*     formula= HCdO2(-1)
      charge=  -1.0      ion size=  3.6 A      mole wt.=  145.4170 g
      3 species in reaction
      1.0000 Cd++           2.0000 H2O           -3.0000 H+           
      35.8372    33.3020    30.4634    27.9596
      25.6076    23.8655    22.5728    21.6614
*    References DGf or LogK 97asho/sas ; DHf n/a
*    S° 97asho/sas ; Cp 97asho/sas


HCl
*     formula= HCl
      charge=  0.0      ion size=  3.4 A      mole wt.=  36.4600 g
      2 species in reaction
      1.0000 Cl-           1.0000 H+           
      0.4584    0.7100    0.8523    0.8054
      0.5336    0.0929    -0.4916    -1.2541
*    References DGf or LogK 97tag/zot ; DHf n/a
*    S° 99aki/zot, d'apres 97tag/zot ; Cp 99aki/zot, d'apres 97tag/zot


HClO(aq)
*     formula= HClO(0)
      charge=  0.0      ion size=  3.4 A      mole wt.=  52.4600 g
      2 species in reaction
      1.0000 ClO-           1.0000 H+           
      -7.7967    -7.5499    -7.3483    -7.2474
      -7.2554    -7.3835    -7.6359    -8.0745
*    References DGf or LogK 97asho/sas ; DHf n/a
*    S° 97asho/sas ; Cp 97asho/sas


HClO2
*     formula= HClO2
      charge=  0.0      ion size=  3.4 A      mole wt.=  68.4590 g
      2 species in reaction
      1.0000 ClO2-           1.0000 H+           
      -1.7879    -1.9791    -2.3031    -2.7024
      -3.2230    -3.7727    -4.3820    -5.1369
*    References DGf or LogK 97asho/sas ; DHf n/a
*    S° 97asho/sas ; Cp 97asho/sas


HCN
*     formula= HCN
      charge=  0.0      ion size=  3.4 A      mole wt.=  27.0250 g
      2 species in reaction
      1.0000 CN-           1.0000 H+           
      -9.9905    -9.2358    -8.5011    -7.9564
      -7.5688    -7.4146    -7.4555    -7.7215
*    References DGf or LogK 93sho/mck ; DHf n/a
*    S° 93sho/mck ; Cp 93sho/mck


HCoO2-
*     formula= HCoO2(-1)
      charge=  -1.0      ion size=  3.6 A      mole wt.=  91.9400 g
      3 species in reaction
      1.0000 Co++           2.0000 H2O           -3.0000 H+           
      33.9273    31.7020    29.1330    26.7986
      24.5337    22.7940    21.4503    20.4511
*    References DGf or LogK 98ply/zha ; DHf n/a
*    S° 97asho/sas ; Cp 97asho/sas


HCrO2(aq)
*     formula= HCrO2(0)
      charge=  0.0      ion size=  3.4 A      mole wt.=  84.9730 g
      3 species in reaction
      1.0000 Cr+++           2.0000 H2O           -3.0000 H+           
      18.7149    16.1920    13.4176    10.9964
      8.7072    6.9413    5.4916    4.2162
*    References DGf or LogK 87rai/sas ; DHf n/a
*    S° 97asho/sas ; Cp 97asho/sas


HCrO4-
*     formula= HCrO4(-)
      charge=  -1.0      ion size=  3.6 A      mole wt.=  116.9720 g
      2 species in reaction
      1.0000 CrO4--           1.0000 H+           
      -6.4617    -6.5200    -6.7303    -7.0634
      -7.5639    -8.1421    -8.8161    -9.6607
*    References DGf or LogK 04chi ; DHf n/a
*    S° 97asho/sas ; Cp 97asho/sas


HCuO2-
*     formula= HCuO2(-1)
      charge=  -1.0      ion size=  3.6 A      mole wt.=  96.5530 g
      3 species in reaction
      1.0000 Cu++           2.0000 H2O           -3.0000 H+           
      28.8920    26.6020    24.1092    21.9720
      20.0155    18.5886    17.5157    16.6965
*    References DGf or LogK 07pow/bro ; DHf n/a
*    S° 97asho/sas ; Cp 97asho/sas


HF(aq)
*     formula= HF(0)
      charge=  0.0      ion size=  3.4 A      mole wt.=  20.0060 g
      2 species in reaction
      1.0000 F-           1.0000 H+           
      -3.0227    -3.2078    -3.5117    -3.8850
      -4.3771    -4.9039    -5.4923    -6.2096
*    References DGf or LogK 89bsho/hel ; DHf n/a
*    S° 89bsho/hel ; Cp 89bsho/hel


HF2-
*     formula= HF2(-)
      charge=  -1.0      ion size=  3.6 A      mole wt.=  39.0050 g
      2 species in reaction
      2.0000 F-           1.0000 H+           
      -2.3153    -2.6305    -3.0368    -3.4596
      -3.9571    -4.4586    -5.0120    -5.6983
*    References DGf or LogK 88sho/hel ; DHf n/a
*    S° 88sho/hel ; Cp 88sho/hel


HFeO2(aq)
*     formula= HFeO2(+0)
      charge=  0.0      ion size=  3.4 A      mole wt.=  88.8540 g
      3 species in reaction
      1.0000 Fe+++           2.0000 H2O           -3.0000 H+           
      16.8072    14.3020    11.6423    9.4109
      7.3989    5.9291    4.7817    3.8062
*    References DGf or LogK 07ste ; DHf n/a
*    S° 97asho/sas ; Cp 97asho/sas


HFeO2-
*     formula= HFeO2(-1)
      charge=  -1.0      ion size=  3.6 A      mole wt.=  88.8540 g
      3 species in reaction
      1.0000 Fe++           2.0000 H2O           -3.0000 H+           
      34.3725    31.9320    29.1437    26.6331
      24.2181    22.3779    20.9658    19.9221
*    References DGf or LogK 76bae/mes ; DHf n/a
*    S° 97asho/sas ; Cp 97asho/sas


HfO++
*     formula= HfO+2
      charge=  2.0      ion size=  5.7 A      mole wt.=  194.4890 g
      3 species in reaction
      1.0000 Hf++++           1.0000 H2O           -2.0000 H+           
      3.6126    2.4037    1.0720    -0.0969
      -1.2172    -2.1045    -2.8604    -3.5491
*    References DGf or LogK 97asho/sas ; DHf n/a
*    S° 97asho/sas ; Cp 97asho/sas


HfO2(aq)
*     formula= HfO2(0)
      charge=  0.0      ion size=  3.4 A      mole wt.=  210.4890 g
      3 species in reaction
      1.0000 Hf++++           2.0000 H2O           -4.0000 H+           
      12.2774    10.6714    8.7757    6.9947
      5.1541    3.5743    2.1242    0.7091
*    References DGf or LogK 97asho/sas ; DHf n/a
*    S° 97asho/sas ; Cp 97asho/sas


HfOH+++
*     formula= HfOH+3
      charge=  3.0      ion size=  8.2 A      mole wt.=  195.4970 g
      3 species in reaction
      1.0000 Hf++++           1.0000 H2O           -1.0000 H+           
      0.6260    0.2047    -0.3485    -0.9125
      -1.5356    -2.0973    -2.6237    -3.1305
*    References DGf or LogK 97asho/sas ; DHf n/a
*    S° 97asho/sas ; Cp 97asho/sas


Hg(HS)2(aq)
*     formula= Hg(HS)2(0)
      charge=  0.0      ion size=  3.4 A      mole wt.=  266.7380 g
      2 species in reaction
      1.0000 Hg++           2.0000 HS-           
      -42.9446    -39.7592    -36.2750    -33.2630
      -30.5198    -28.6143    -27.3934    -26.8725
*    References DGf or LogK 05bes/app ; DHf n/a
*    S° 05bes/app ; Cp 05bes/app


Hg(OH)2
*     formula= Hg(OH)2
      charge=  0.0      ion size=  3.4 A      mole wt.=  234.6050 g
      3 species in reaction
      1.0000 Hg++           2.0000 H2O           -2.0000 H+           
      6.9011    6.0770    5.1809    4.4208
      3.7338    3.2315    2.8360    2.4837
*    References DGf or LogK 05bes/app ; DHf n/a
*    S° 12bla ; Cp 05bes/app


Hg(OH)CO3-
*     formula= Hg(OH)CO3-
      charge=  -1.0      ion size=  3.6 A      mole wt.=  277.6060 g
      4 species in reaction
      1.0000 HCO3-           1.0000 Hg++           1.0000 H2O
      -2.0000 H+           
      5.0949    5.0949    5.0949    5.0949
      5.0949    5.0949    5.0949    5.0949
*    References DGf or LogK 05pow/bro ; DHf n/a
*    S° n/a ; Cp n/a


Hg2(OH)+
*     formula= Hg2(OH)+
      charge=  1.0      ion size=  4.1 A      mole wt.=  418.1870 g
      3 species in reaction
      1.0000 Hg2++           1.0000 H2O           -1.0000 H+           
      5.0000    5.0000    5.0000    5.0000
      5.0000    5.0000    5.0000    5.0000
*    References DGf or LogK 76bae/mes ; DHf n/a
*    S° n/a ; Cp n/a


Hg2(OH)+++
*     formula= Hg2(OH)+3
      charge=  3.0      ion size=  8.2 A      mole wt.=  418.1870 g
      3 species in reaction
      2.0000 Hg++           1.0000 H2O           -1.0000 H+           
      3.5560    3.3310    3.1281    3.0058
      2.9391    2.9000    2.8298    2.6649
*    References DGf or LogK 76bae/mes ; DHf 76bae/mes
*    S° n/a ; Cp n/a


Hg3(OH)3+++
*     formula= Hg3(OH)3(+3)
      charge=  3.0      ion size=  8.2 A      mole wt.=  652.7920 g
      3 species in reaction
      3.0000 Hg++           3.0000 H2O           -3.0000 H+           
      6.4200    6.4200    6.4200    6.4200
      6.4200    6.4200    6.4200    6.4200
*    References DGf or LogK 76bae/mes ; DHf n/a
*    S° n/a ; Cp n/a


HgCl+
*     formula= HgCl(1)
      charge=  1.0      ion size=  4.1 A      mole wt.=  236.0420 g
      2 species in reaction
      1.0000 Hg++           1.0000 Cl-           
      -7.7958    -7.2100    -6.6857    -6.3540
      -6.2099    -6.2908    -6.5742    -7.1045
*    References DGf or LogK 76bae/mes ; DHf n/a
*    S° 97sve/sho ; Cp 97sve/sho


HgCl2(aq)
*     formula= HgCl2(0)
      charge=  0.0      ion size=  3.4 A      mole wt.=  271.4950 g
      2 species in reaction
      2.0000 Cl-           1.0000 Hg++           
      -15.2561    -13.9800    -12.8056    -12.0197
      -11.5984    -11.6385    -12.0873    -13.0287
*    References DGf or LogK 76bae/mes ; DHf n/a
*    S° 97sve/sho ; Cp 97sve/sho


HgCl3-
*     formula= HgCl3(-1)
      charge=  -1.0      ion size=  3.6 A      mole wt.=  306.9470 g
      2 species in reaction
      3.0000 Cl-           1.0000 Hg++           
      -16.6471    -15.0600    -13.6673    -12.8083
      -12.4486    -12.6524    -13.3282    -14.5407
*    References DGf or LogK 76bae/mes ; DHf n/a
*    S° 97sve/sho ; Cp 97sve/sho


HgCl4--
*     formula= HgCl4(-2)
      charge=  -2.0      ion size=  4.7 A      mole wt.=  342.4000 g
      2 species in reaction
      4.0000 Cl-           1.0000 Hg++           
      -17.4104    -15.4200    -13.6973    -12.6553
      -12.2355    -12.4880    -13.2731    -14.6236
*    References DGf or LogK 76bae/mes ; DHf n/a
*    S° 97sve/sho ; Cp 97sve/sho


HgCO3
*     formula= HgCO3
      charge=  0.0      ion size=  3.4 A      mole wt.=  260.5990 g
      3 species in reaction
      1.0000 HCO3-           1.0000 Hg++           -1.0000 H+           
      -1.0503    -1.0503    -1.0503    -1.0503
      -1.0503    -1.0503    -1.0503    -1.0503
*    References DGf or LogK 05pow/bro ; DHf n/a
*    S° n/a ; Cp n/a


HgF+
*     formula= HgF(1)
      charge=  1.0      ion size=  4.1 A      mole wt.=  219.5880 g
      2 species in reaction
      1.0000 F-           1.0000 Hg++           
      -1.7356    -1.6674    -1.7419    -1.9552
      -2.3428    -2.8384    -3.4544    -4.2570
*    References DGf or LogK 97sve/sho ; DHf n/a
*    S° 97sve/sho ; Cp 97sve/sho


HgHCO3+
*     formula= HgHCO3+
      charge=  1.0      ion size=  4.1 A      mole wt.=  261.6070 g
      2 species in reaction
      1.0000 HCO3-           1.0000 Hg++           
      -5.3803    -5.3803    -5.3803    -5.3803
      -5.3803    -5.3803    -5.3803    -5.3803
*    References DGf or LogK 05pow/bro ; DHf n/a
*    S° n/a ; Cp n/a


HgHPO4
*     formula= HgHPO4
      charge=  0.0      ion size=  3.4 A      mole wt.=  296.5690 g
      3 species in reaction
      1.0000 Hg++           1.0000 H2PO4-           -1.0000 H+           
      -1.5874    -1.5874    -1.5874    -1.5874
      -1.5874    -1.5874    -1.5874    -1.5874
*    References DGf or LogK 05pow/bro ; DHf n/a
*    S° n/a ; Cp n/a


HgOH+
*     formula= HgOH(+1)
      charge=  1.0      ion size=  4.1 A      mole wt.=  217.5970 g
      3 species in reaction
      1.0000 Hg++           1.0000 H2O           -1.0000 H+           
      3.8582    3.4010    2.8173    2.2370
      1.6127    1.0653    0.5622    0.0730
*    References DGf or LogK 76bae/mes ; DHf n/a
*    S° 97asho/sas ; Cp 97asho/sas


HgOHCl
*     formula= HgOHCl
      charge=  0.0      ion size=  3.4 A      mole wt.=  253.0500 g
      4 species in reaction
      1.0000 Hg++           1.0000 Cl-           1.0000 H2O
      -1.0000 H+           
      -4.0679    -4.0590    -4.0653    -4.0838
      -4.1390    -4.2576    -4.4863    -4.9177
*    References DGf or LogK 76bae/mes ; DHf 76bae/mes
*    S° n/a ; Cp n/a


HgPO4-
*     formula= HgPO4-
      charge=  -1.0      ion size=  3.6 A      mole wt.=  295.5610 g
      3 species in reaction
      1.0000 Hg++           1.0000 H2PO4-           -2.0000 H+           
      3.9623    3.9623    3.9623    3.9623
      3.9623    3.9623    3.9623    3.9623
*    References DGf or LogK 05pow/bro ; DHf n/a
*    S° n/a ; Cp n/a


HgS(HS)-
*     formula= HgHS2-
      charge=  -1.0      ion size=  3.6 A      mole wt.=  265.7300 g
      3 species in reaction
      1.0000 Hg++           2.0000 HS-           -1.0000 H+           
      -36.5042    -33.6277    -30.4485    -27.6637
      -25.0776    -23.2184    -21.9369    -21.2063
*    References DGf or LogK 05bes/app ; DHf n/a
*    S° 05bes/app ; Cp 05bes/app


HgS2--
*     formula= HgS2(-2)
      charge=  -2.0      ion size=  4.7 A      mole wt.=  264.7220 g
      3 species in reaction
      1.0000 Hg++           2.0000 HS-           -2.0000 H+           
      -25.3277    -25.3277    -25.3277    -25.3277
      -25.3277    -25.3277    -25.3277    -25.3277
*    References DGf or LogK 63sch/wid ; DHf n/a
*    S° n/a ; Cp n/a


HgSO4
*     formula= HgSO4
      charge=  0.0      ion size=  3.4 A      mole wt.=  296.6540 g
      4 species in reaction
      1.0000 Hg(aq)           1.0000 HSO5-           1.0000 H+
      -1.0000 H2O           
      -39.2549    -39.2549    -39.2549    -39.2549
      -39.2549    -39.2549    -39.2549    -39.2549
*    References DGf or LogK 05pow/bro ; DHf n/a
*    S° n/a ; Cp n/a


HHfO2+
*     formula= HHfO2+1
      charge=  1.0      ion size=  4.1 A      mole wt.=  211.4970 g
      3 species in reaction
      1.0000 Hf++++           2.0000 H2O           -3.0000 H+           
      7.0036    5.9802    4.6729    3.3661
      1.9448    0.6774    -0.5116    -1.6906
*    References DGf or LogK 97asho/sas ; DHf n/a
*    S° 97asho/sas ; Cp 97asho/sas


HHfO3-
*     formula= HHfO3(-1)
      charge=  -1.0      ion size=  3.6 A      mole wt.=  227.4960 g
      3 species in reaction
      1.0000 Hf++++           3.0000 H2O           -5.0000 H+           
      19.2798    17.1800    14.7642    12.5745
      10.4363    8.7526    7.3826    6.2687
*    References DGf or LogK 97asho/sas ; DHf n/a
*    S° 97asho/sas ; Cp 97asho/sas


HHgO2-
*     formula= HHgO2(-1)
      charge=  -1.0      ion size=  3.6 A      mole wt.=  233.5970 g
      3 species in reaction
      1.0000 Hg++           2.0000 H2O           -3.0000 H+           
      22.6449    21.1020    19.4848    18.1692
      17.0609    16.3602    15.9561    15.8153
*    References DGf or LogK 76bae/mes ; DHf n/a
*    S° 97asho/sas ; Cp 97asho/sas


HInO2(aq)
*     formula= HInO2(0)
      charge=  0.0      ion size=  3.4 A      mole wt.=  147.8270 g
      3 species in reaction
      1.0000 In+++           2.0000 H2O           -3.0000 H+           
      14.8076    12.4306    9.9510    7.9138
      6.1248    4.8582    3.8980    3.0963
*    References DGf or LogK 97asho/sas ; DHf n/a
*    S° 97asho/sas ; Cp 97asho/sas


HIO(aq)
*     formula= HIO(0)
      charge=  0.0      ion size=  3.4 A      mole wt.=  143.9120 g
      2 species in reaction
      1.0000 IO-           1.0000 H+           
      -11.1398    -10.6285    -10.0969    -9.6712
      -9.3352    -9.1708    -9.1668    -9.3656
*    References DGf or LogK 97asho/sas ; DHf n/a
*    S° 97asho/sas ; Cp 97asho/sas


HIO3
*     formula= HIO3
      charge=  0.0      ion size=  3.4 A      mole wt.=  175.9110 g
      2 species in reaction
      1.0000 IO3-           1.0000 H+           
      -0.6806    -0.8063    -1.0288    -1.3109
      -1.6896    -2.1027    -2.5782    -3.1947
*    References DGf or LogK 97asho/sas ; DHf n/a
*    S° 97asho/sas ; Cp 97asho/sas


HMnO2-
*     formula= HMnO2(-1)
      charge=  -1.0      ion size=  3.6 A      mole wt.=  87.9450 g
      3 species in reaction
      1.0000 Mn++           2.0000 H2O           -3.0000 H+           
      37.4741    34.7872    31.7830    29.1346
      26.6446    24.7946    23.4125    22.4239
*    References DGf or LogK 97asho/sas ; DHf n/a
*    S° 97asho/sas ; Cp 97asho/sas


HMoO4-
*     formula= HMoO4(-1)
      charge=  -1.0      ion size=  3.6 A      mole wt.=  160.9460 g
      2 species in reaction
      1.0000 MoO4--           1.0000 H+           
      -4.4024    -4.3980    -4.5641    -4.8807
      -5.3883    -5.9886    -6.6891    -7.5523
*    References DGf or LogK 97asho/sas ; DHf n/a
*    S° 97asho/sas ; Cp 97asho/sas


HN2O2-
*     formula= HN2O2-
      charge=  -1.0      ion size=  3.6 A      mole wt.=  61.0200 g
      4 species in reaction
      0.6667 N2(aq)           0.6667 NO2-           0.6667 H2O
      -0.3333 H+           
      46.3636    42.6764    38.4993    34.7467
      31.1293    28.3523    26.1844    24.4980
*    References DGf or LogK 97asho/sas ; DHf n/a
*    S° 97asho/sas ; Cp 97asho/sas


HNbO3(aq)
*     formula= HNbO3(0)
      charge=  0.0      ion size=  3.4 A      mole wt.=  141.9130 g
      2 species in reaction
      1.0000 NbO3-           1.0000 H+           
      -7.2711    -7.1101    -7.0881    -7.2260
      -7.5527    -8.0110    -8.6080    -9.4257
*    References DGf or LogK 97asho/sas ; DHf n/a
*    S° 97asho/sas ; Cp 97asho/sas


HNiO2-
*     formula= HNiO2(-1)
      charge=  -1.0      ion size=  3.6 A      mole wt.=  91.7000 g
      3 species in reaction
      1.0000 Ni++           2.0000 H2O           -3.0000 H+           
      33.5333    31.5020    29.1146    26.9101
      24.7374    23.0423    21.7136    20.7073
*    References DGf or LogK 12bla ; DHf n/a
*    S° 12coo/oli ; Cp 97asho/sas


HNO2
*     formula= HNO2
      charge=  0.0      ion size=  3.4 A      mole wt.=  47.0130 g
      2 species in reaction
      1.0000 NO2-           1.0000 H+           
      -3.4879    -3.2252    -2.9900    -2.8430
      -2.7863    -2.8425    -3.0141    -3.3568
*    References DGf or LogK 97asho/sas ; DHf n/a
*    S° 97asho/sas ; Cp 97asho/sas


HNO3(aq)
*     formula= HNO3(0)
      charge=  0.0      ion size=  3.4 A      mole wt.=  63.0130 g
      2 species in reaction
      1.0000 NO3-           1.0000 H+           
      1.5417    1.3025    0.9524    0.5574
      0.0730    -0.4180    -0.9512    -1.6101
*    References DGf or LogK 97asho/sas ; DHf n/a
*    S° 97asho/sas ; Cp 97asho/sas


HoCl++
*     formula= HoCl+2
      charge=  2.0      ion size=  5.7 A      mole wt.=  200.3830 g
      2 species in reaction
      1.0000 Cl-           1.0000 Ho+++           
      -0.0852    -0.2478    -0.5838    -1.0396
      -1.6743    -2.3742    -3.1631    -4.1119
*    References DGf or LogK 95haa/sho ; DHf n/a
*    S° 95haa/sho ; Cp 95haa/sho


HoCl2+
*     formula= HoCl2+
      charge=  1.0      ion size=  4.1 A      mole wt.=  235.8350 g
      2 species in reaction
      2.0000 Cl-           1.0000 Ho+++           
      0.2112    0.0175    -0.4247    -1.0549
      -1.9713    -3.0269    -4.2724    -5.8516
*    References DGf or LogK 95haa/sho ; DHf n/a
*    S° 95haa/sho ; Cp 95haa/sho


HoCl3(aq)
*     formula= HoCl3(aq)
      charge=  0.0      ion size=  3.4 A      mole wt.=  271.2880 g
      2 species in reaction
      3.0000 Cl-           1.0000 Ho+++           
      0.5017    0.4294    0.1356    -0.3661
      -1.1934    -2.2528    -3.6251    -5.5282
*    References DGf or LogK 95haa/sho ; DHf n/a
*    S° 95haa/sho ; Cp 95haa/sho


HoCl4-
*     formula= HoCl4-
      charge=  -1.0      ion size=  3.6 A      mole wt.=  306.7400 g
      2 species in reaction
      4.0000 Cl-           1.0000 Ho+++           
      0.5922    0.8413    0.9997    0.9873
      0.7258    0.1898    -0.6895    -2.1198
*    References DGf or LogK 95haa/sho ; DHf n/a
*    S° 95haa/sho ; Cp 95haa/sho


HoCO3+
*     formula= HoCO3+
      charge=  1.0      ion size=  4.1 A      mole wt.=  224.9390 g
      3 species in reaction
      1.0000 HCO3-           1.0000 Ho+++           -1.0000 H+           
      2.1431    2.2425    2.4033    2.5853
      2.7735    2.8842    2.8700    2.6333
*    References DGf or LogK 95haa/sho ; DHf n/a
*    S° 95haa/sho ; Cp 95haa/sho


HoF++
*     formula= HoF+2
      charge=  2.0      ion size=  5.7 A      mole wt.=  183.9290 g
      2 species in reaction
      1.0000 F-           1.0000 Ho+++           
      -4.4807    -4.7750    -5.2658    -5.8628
      -6.6386    -7.4575    -8.3566    -9.4139
*    References DGf or LogK 95haa/sho ; DHf n/a
*    S° 95haa/sho ; Cp 95haa/sho


HoF2+
*     formula= HoF2+
      charge=  1.0      ion size=  4.1 A      mole wt.=  202.9270 g
      2 species in reaction
      2.0000 F-           1.0000 Ho+++           
      -8.2936    -8.3772    -8.7043    -9.2308
      -10.0471    -11.0323    -12.2386    -13.8107
*    References DGf or LogK 95haa/sho ; DHf n/a
*    S° 95haa/sho ; Cp 95haa/sho


HoF3(aq)
*     formula= HoF3(aq)
      charge=  0.0      ion size=  3.4 A      mole wt.=  221.9260 g
      2 species in reaction
      3.0000 F-           1.0000 Ho+++           
      -11.3338    -11.0265    -10.9070    -11.0383
      -11.5097    -12.3062    -13.4967    -15.2914
*    References DGf or LogK 95haa/sho ; DHf n/a
*    S° 95haa/sho ; Cp 95haa/sho


HoF4-
*     formula= HoF4-
      charge=  -1.0      ion size=  3.6 A      mole wt.=  240.9240 g
      2 species in reaction
      4.0000 F-           1.0000 Ho+++           
      -14.1623    -13.1627    -12.1811    -11.4549
      -10.9972    -10.9792    -11.4390    -12.5809
*    References DGf or LogK 95haa/sho ; DHf n/a
*    S° 95haa/sho ; Cp 95haa/sho


HoH2PO4++
*     formula= HoH2PO4+2
      charge=  2.0      ion size=  5.7 A      mole wt.=  261.9180 g
      2 species in reaction
      1.0000 Ho+++           1.0000 H2PO4-           
      -1.2409    -1.0365    -0.9960    -1.1368
      -1.4820    -1.9639    -2.5786    -3.3796
*    References DGf or LogK 95haa/sho ; DHf n/a
*    S° 95haa/sho ; Cp 95haa/sho


HoHCO3++
*     formula= HoHCO3+2
      charge=  2.0      ion size=  5.7 A      mole wt.=  225.9470 g
      2 species in reaction
      1.0000 HCO3-           1.0000 Ho+++           
      -1.6789    -1.7157    -1.9488    -2.3379
      -2.9290    -3.6095    -4.3918    -5.3368
*    References DGf or LogK 95haa/sho ; DHf n/a
*    S° 95haa/sho ; Cp 95haa/sho


HoNO3++
*     formula= HoNO3+2
      charge=  2.0      ion size=  5.7 A      mole wt.=  226.9350 g
      2 species in reaction
      1.0000 Ho+++           1.0000 NO3-           
      -0.7688    -0.2148    0.2456    0.5081
      0.5854    0.4639    0.1691    -0.3358
*    References DGf or LogK 95haa/sho ; DHf n/a
*    S° 95haa/sho ; Cp 95haa/sho


HoO+
*     formula= HoO+
      charge=  1.0      ion size=  4.1 A      mole wt.=  180.9300 g
      3 species in reaction
      1.0000 Ho+++           1.0000 H2O           -2.0000 H+           
      18.4270    16.0375    13.4181    11.1346
      8.9825    7.3370    6.0111    4.8788
*    References DGf or LogK 95haa/sho ; DHf n/a
*    S° 95haa/sho ; Cp 95haa/sho


HoO2-
*     formula= HoO2-
      charge=  -1.0      ion size=  3.6 A      mole wt.=  196.9290 g
      3 species in reaction
      1.0000 Ho+++           2.0000 H2O           -4.0000 H+           
      37.6431    33.4678    28.9047    24.9563
      21.2962    18.5898    16.5379    14.9819
*    References DGf or LogK 95haa/sho ; DHf n/a
*    S° 95haa/sho ; Cp 95haa/sho


HoO2H(aq)
*     formula= HoO2H(aq)
      charge=  0.0      ion size=  3.4 A      mole wt.=  197.9370 g
      3 species in reaction
      1.0000 Ho+++           2.0000 H2O           -3.0000 H+           
      28.1133    24.5252    20.6840    17.4300
      14.4732    12.3128    10.6535    9.2946
*    References DGf or LogK 95haa/sho ; DHf n/a
*    S° 95haa/sho ; Cp 95haa/sho


HoOH++
*     formula= HoOH+2
      charge=  2.0      ion size=  5.7 A      mole wt.=  181.9380 g
      3 species in reaction
      1.0000 Ho+++           1.0000 H2O           -1.0000 H+           
      9.0323    7.7546    6.3151    5.0280
      3.7823    2.8031    1.9950    1.2956
*    References DGf or LogK 95haa/sho ; DHf n/a
*    S° 95haa/sho ; Cp 95haa/sho


HoSO4+
*     formula= HoSO4+
      charge=  1.0      ion size=  4.1 A      mole wt.=  260.9940 g
      2 species in reaction
      1.0000 Ho+++           1.0000 SO4--           
      -3.3633    -3.6494    -4.0660    -4.5406
      -5.1592    -5.8586    -6.7235    -7.9188
*    References DGf or LogK 95haa/sho ; DHf n/a
*    S° 95haa/sho ; Cp 95haa/sho


HP2O7---
*     formula= HP2O7-3
      charge=  -3.0      ion size=  6.7 A      mole wt.=  174.9510 g
      3 species in reaction
      2.0000 H2PO4-           -1.0000 H2O           -1.0000 H+           
      8.8432    8.4093    7.8999    7.4357
      7.0054    6.7261    6.6065    6.7045
*    References DGf or LogK 92gre/fug ; DHf n/a
*    S° 97asho/sas ; Cp 97asho/sas


HPbO2-
*     formula= HPbO2(-1)
      charge=  -1.0      ion size=  3.6 A      mole wt.=  240.2070 g
      3 species in reaction
      1.0000 Pb++           2.0000 H2O           -3.0000 H+           
      29.3814    27.2020    24.9139    23.0380
      21.4308    20.3780    19.7188    19.3877
*    References DGf or LogK 06bla/pia ; DHf n/a
*    S° 97asho/sas ; Cp 97asho/sas


HPO3--
*     formula= HPO3-2
      charge=  -2.0      ion size=  4.7 A      mole wt.=  79.9800 g
      2 species in reaction
      1.0000 H2PO3-           -1.0000 H+           
      6.1946    6.1442    6.1877    6.3304
      6.6039    6.9688    7.4410    8.0867
*    References DGf or LogK n/a ; DHf 97asho/sas
*    S° 97asho/sas ; Cp 97asho/sas


HPO3F-
*     formula= HPO3F-
      charge=  -1.0      ion size=  3.6 A      mole wt.=  98.9780 g
      4 species in reaction
      1.0000 F-           1.0000 H2PO4-           1.0000 H+
      -1.0000 H2O           
      -2.9195    -2.9195    -2.9195    -2.9195
      -2.9195    -2.9195    -2.9195    -2.9195
*    References DGf or LogK 82wag/eva ; DHf n/a
*    S° n/a ; Cp n/a


HPO4--
*     formula= HPO4(-2)
      charge=  -2.0      ion size=  4.0 A      mole wt.=  95.9790 g
      2 species in reaction
      1.0000 H2PO4-           -1.0000 H+           
      7.3173    7.2121    7.2054    7.3139
      7.5653    7.9219    8.3926    9.0362
*    References DGf or LogK n/a ; DHf 89cox/wag
*    S° 89cox/wag ; Cp 97asho/sas


HS2O3-
*     formula= HS2O3(-1)
      charge=  -1.0      ion size=  3.6 A      mole wt.=  113.1380 g
      2 species in reaction
      1.0000 S2O3--           1.0000 H+           
      -1.6448    -1.7200    -1.9426    -2.2789
      -2.7718    -3.3310    -3.9737    -4.7673
*    References DGf or LogK 04chi ; DHf n/a
*    S° 97asho/sas ; Cp 97asho/sas


HS2O4-
*     formula= HS2O4(-1)
      charge=  -1.0      ion size=  3.6 A      mole wt.=  129.1380 g
      2 species in reaction
      1.0000 S2O4--           1.0000 H+           
      -2.4986    -2.5000    -2.6441    -2.9142
      -3.3471    -3.8626    -4.4723    -5.2411
*    References DGf or LogK 04chi ; DHf n/a
*    S° 97asho/sas ; Cp 97asho/sas


HSb2S4-
*     formula= HSb2S4(-1)
      charge=  -1.0      ion size=  3.6 A      mole wt.=  372.7920 g
      4 species in reaction
      4.0000 HS-           2.0000 Sb(OH)3(aq)           3.0000 H+
      -6.0000 H2O           
      -57.9544    -53.0277    -47.5884    -42.8814
      -38.6132    -35.6681    -33.7952    -33.0005
*    References DGf or LogK 05bes/app ; DHf n/a
*    S° 05bes/app ; Cp 05bes/app


HScO2(aq)
*     formula= HScO2(0)
      charge=  0.0      ion size=  3.4 A      mole wt.=  77.9630 g
      3 species in reaction
      1.0000 Sc+++           2.0000 H2O           -3.0000 H+           
      18.8376    16.0956    13.2148    10.8270
      8.7095    7.1978    6.0499    5.1011
*    References DGf or LogK 97asho/sas ; DHf n/a
*    S° 97asho/sas ; Cp 97asho/sas


HSeO3-
*     formula= HSeO3(-)
      charge=  -1.0      ion size=  3.6 A      mole wt.=  127.9660 g
      2 species in reaction
      1.0000 SeO3--           1.0000 H+           
      -7.4326    -7.2860    -7.2700    -7.4038
      -7.7153    -8.1486    -8.7053    -9.4439
*    References DGf or LogK 97asho/sas ; DHf n/a
*    S° 97asho/sas ; Cp 97asho/sas


HSeO4-
*     formula= HSeO4(-)
      charge=  -1.0      ion size=  3.6 A      mole wt.=  143.9660 g
      2 species in reaction
      1.0000 SeO4--           1.0000 H+           
      -1.6879    -1.9058    -2.3078    -2.8226
      -3.5072    -4.2322    -5.0220    -5.9509
*    References DGf or LogK 97asho/sas ; DHf n/a
*    S° 97asho/sas ; Cp 97asho/sas


HSiO3-
*     formula= HSiO3(-)
      charge=  -1.0      ion size=  3.6 A      mole wt.=  77.0920 g
      3 species in reaction
      1.0000 H4SiO4(aq)           -1.0000 H2O           -1.0000 H+           
      10.2555    9.8190    9.3558    9.0253
      8.8458    8.8671    9.0617    9.4552
*    References DGf or LogK 01fel/cho ; DHf n/a
*    S° 97sve/sho ; Cp 97sve/sho


HSnO2-
*     formula= HSnO2(-1)
      charge=  -1.0      ion size=  3.6 A      mole wt.=  151.7170 g
      3 species in reaction
      1.0000 Sn++           2.0000 H2O           -3.0000 H+           
      17.7640    16.5868    15.3859    14.4471
      13.7056    13.2902    13.1131    13.1561
*    References DGf or LogK 97asho/sas ; DHf n/a
*    S° 97asho/sas ; Cp 97asho/sas


HSO3-
*     formula= HSO3(-)
      charge=  -1.0      ion size=  4.2 A      mole wt.=  81.0720 g
      2 species in reaction
      1.0000 SO3--           1.0000 H+           
      -7.1730    -7.1700    -7.3143    -7.5918
      -8.0433    -8.5883    -9.2391    -10.0606
*    References DGf or LogK 04chi ; DHf n/a
*    S° 04chi ; Cp 97asho/sas


HSO4-
*     formula= HSO4(-)
      charge=  -1.0      ion size=  3.6 A      mole wt.=  97.0720 g
      2 species in reaction
      1.0000 SO4--           1.0000 H+           
      -1.6880    -1.9815    -2.4738    -3.0688
      -3.8270    -4.6044    -5.4318    -6.3861
*    References DGf or LogK n/a ; DHf 04chi
*    S° 04chi ; Cp 97asho/sas


HTlO2(aq)
*     formula= HTlO2(0)
      charge=  0.0      ion size=  3.4 A      mole wt.=  237.3900 g
      3 species in reaction
      1.0000 Tl+++           2.0000 H2O           -3.0000 H+           
      5.0943    3.3020    1.6642    0.5494
      -0.1696    -0.4540    -0.5083    -0.4724
*    References DGf or LogK 81tur/whi ; DHf n/a
*    S° 97asho/sas ; Cp 97asho/sas


HUO2+
*     formula= HUO2+
      charge=  1.0      ion size=  4.1 A      mole wt.=  271.0360 g
      3 species in reaction
      1.0000 U++++           2.0000 H2O           -3.0000 H+           
      6.5764    4.9907    3.2543    1.7461
      0.3182    -0.8007    -1.7519    -2.6300
*    References DGf or LogK 97bsho/sas ; DHf n/a
*    S° 97bsho/sas ; Cp 97bsho/sas


HUO2(aq)
*     formula= HUO2(aq)
      charge=  0.0      ion size=  3.4 A      mole wt.=  271.0360 g
      3 species in reaction
      1.0000 U+++           2.0000 H2O           -3.0000 H+           
      24.5814    21.1900    17.6323    14.6892
      12.0938    10.2661    8.9150    7.8421
*    References DGf or LogK 97bsho/sas ; DHf n/a
*    S° 97bsho/sas ; Cp 97bsho/sas


HUO3-
*     formula= HUO3-
      charge=  -1.0      ion size=  3.6 A      mole wt.=  287.0350 g
      3 species in reaction
      1.0000 U++++           3.0000 H2O           -5.0000 H+           
      18.2151    16.5569    14.6191    12.8417
      11.0877    9.6925    8.5467    7.6058
*    References DGf or LogK 97bsho/sas ; DHf n/a
*    S° 97bsho/sas ; Cp 97bsho/sas


HUO4-
*     formula= HUO4-
      charge=  -1.0      ion size=  3.6 A      mole wt.=  303.0350 g
      3 species in reaction
      1.0000 UO2++           2.0000 H2O           -3.0000 H+           
      20.4088    19.2329    17.9345    16.8146
      15.7981    15.0860    14.6078    14.3527
*    References DGf or LogK 97bsho/sas ; DHf n/a
*    S° 97bsho/sas ; Cp 97bsho/sas


HVO4--
*     formula= HVO4(-2)
      charge=  -2.0      ion size=  4.7 A      mole wt.=  115.9470 g
      3 species in reaction
      1.0000 VO2+           2.0000 H2O           -3.0000 H+           
      16.0703    15.1427    13.9241    12.7106
      11.4588    10.4817    9.7874    9.4689
*    References DGf or LogK 97asho/sas ; DHf n/a
*    S° 97asho/sas ; Cp 97asho/sas


HWO4-
*     formula= HWO4(-)
      charge=  -1.0      ion size=  3.6 A      mole wt.=  248.8460 g
      2 species in reaction
      1.0000 WO4--           1.0000 H+           
      -3.5614    -3.5917    -3.7954    -4.1442
      -4.6810    -5.3023    -6.0179    -6.8917
*    References DGf or LogK 97asho/sas ; DHf n/a
*    S° 97asho/sas ; Cp 97asho/sas


HYO2(aq)
*     formula= HYO2(0)
      charge=  0.0      ion size=  3.4 A      mole wt.=  121.9130 g
      3 species in reaction
      1.0000 Y+++           2.0000 H2O           -3.0000 H+           
      29.6542    25.9912    22.0656    18.7353
      15.7023    13.4793    11.7651    10.3568
*    References DGf or LogK 97asho/sas ; DHf n/a
*    S° 97asho/sas ; Cp 97asho/sas


HZnO2-
*     formula= HZnO2(-1)
      charge=  -1.0      ion size=  3.6 A      mole wt.=  98.3970 g
      3 species in reaction
      1.0000 Zn++           2.0000 H2O           -3.0000 H+           
      30.4958    28.1401    25.5313    23.2596
      21.1572    19.6262    18.5113    17.7510
*    References DGf or LogK n/a ; DHf 14aki/tag
*    S° 14aki/tag ; Cp 14aki/tag


HZrO2+
*     formula= HZrO2+
      charge=  1.0      ion size=  4.1 A      mole wt.=  124.2310 g
      3 species in reaction
      1.0000 ZrO++           1.0000 H2O           -1.0000 H+           
      3.3322    3.3566    3.2221    2.9614
      2.5613    2.1192    1.6478    1.1372
*    References DGf or LogK 97asho/sas ; DHf n/a
*    S° 97asho/sas ; Cp 97asho/sas


HZrO3-
*     formula= HZrO3-
      charge=  -1.0      ion size=  3.6 A      mole wt.=  140.2300 g
      3 species in reaction
      1.0000 ZrO++           2.0000 H2O           -3.0000 H+           
      15.2950    14.2631    13.0448    11.9249
      10.8322    9.9939    9.3581    8.9265
*    References DGf or LogK 97asho/sas ; DHf n/a
*    S° 97asho/sas ; Cp 97asho/sas


InCl++
*     formula= InCl(2)
      charge=  2.0      ion size=  5.7 A      mole wt.=  150.2720 g
      2 species in reaction
      1.0000 Cl-           1.0000 In+++           
      -3.4004    -3.2722    -3.2276    -3.2941
      -3.5028    -3.8311    -4.2921    -4.9485
*    References DGf or LogK 97sve/sho ; DHf n/a
*    S° 97sve/sho ; Cp 97sve/sho


InF++
*     formula= InF(2)
      charge=  2.0      ion size=  5.7 A      mole wt.=  133.8180 g
      2 species in reaction
      1.0000 F-           1.0000 In+++           
      -4.2541    -4.6401    -5.1897    -5.7992
      -6.5462    -7.3093    -8.1388    -9.1186
*    References DGf or LogK 97sve/sho ; DHf n/a
*    S° 97sve/sho ; Cp 97sve/sho


InO+
*     formula= InO(+1)
      charge=  1.0      ion size=  4.1 A      mole wt.=  130.8190 g
      3 species in reaction
      1.0000 In+++           1.0000 H2O           -2.0000 H+           
      9.4779    7.8279    6.0757    4.6005
      3.2601    2.2680    1.4810    0.8039
*    References DGf or LogK 97asho/sas ; DHf n/a
*    S° 97asho/sas ; Cp 97asho/sas


InO2-
*     formula= InO2(-1)
      charge=  -1.0      ion size=  3.6 A      mole wt.=  146.8190 g
      3 species in reaction
      1.0000 In+++           2.0000 H2O           -4.0000 H+           
      25.0424    22.0330    18.7819    16.0085
      13.4814    11.6508    10.2961    9.3149
*    References DGf or LogK 97asho/sas ; DHf n/a
*    S° 97asho/sas ; Cp 97asho/sas


InOH++
*     formula= InOH(+2)
      charge=  2.0      ion size=  5.7 A      mole wt.=  131.8270 g
      3 species in reaction
      1.0000 In+++           1.0000 H2O           -1.0000 H+           
      4.4034    4.0163    3.5472    3.1024
      2.6448    2.2586    1.9129    1.5823
*    References DGf or LogK 97asho/sas ; DHf n/a
*    S° 97asho/sas ; Cp 97asho/sas


KAlO2(aq)
*     formula= KAlO2(0)
      charge=  0.0      ion size=  3.4 A      mole wt.=  98.0790 g
      4 species in reaction
      1.0000 Al+++           1.0000 K+           2.0000 H2O
      -4.0000 H+           
      27.6175    24.2239    20.3374    16.8097
      13.3419    10.5707    8.2447    6.1881
*    References DGf or LogK n/a ; DHf 97apok/hel
*    S° 97apok/hel ; Cp 97apok/hel


KAsO4--
*     formula= KAsO4-2
      charge=  -2.0      ion size=  4.7 A      mole wt.=  178.0170 g
      3 species in reaction
      1.0000 H2AsO4-           1.0000 K+           -2.0000 H+           
      15.9972    14.0028    11.9063    10.1960
      8.7472    7.8181    7.2563    6.9957
*    References DGf or LogK 07mar/acc ; DHf n/a
*    S° 07mar/acc ; Cp 07mar/acc


KBr(aq)
*     formula= KBr(0)
      charge=  0.0      ion size=  3.4 A      mole wt.=  119.0020 g
      2 species in reaction
      1.0000 Br-           1.0000 K+           
      1.9579    1.7456    1.4578    1.1451
      0.7644    0.3716    -0.0700    -0.6371
*    References DGf or LogK 97sve/sho ; DHf n/a
*    S° 97sve/sho ; Cp 97sve/sho


KCl(aq)
*     formula= KCl(0)
      charge=  0.0      ion size=  3.4 A      mole wt.=  74.5510 g
      2 species in reaction
      1.0000 Cl-           1.0000 K+           
      0.5283    0.5000    0.3819    0.2036
      -0.0566    -0.3607    -0.7361    -1.2563
*    References DGf or LogK 97smi/mar ; DHf 97smi/mar
*    S° n/a ; Cp 97bpok/hel


KH2AsO4
*     formula= KH2AsO4
      charge=  0.0      ion size=  3.4 A      mole wt.=  180.0330 g
      2 species in reaction
      1.0000 H2AsO4-           1.0000 K+           
      2.1035    1.9032    1.6268    1.3297
      0.9757    0.6178    0.2190    -0.2968
*    References DGf or LogK 07mar/acc ; DHf n/a
*    S° 07mar/acc ; Cp 07mar/acc


KH2PO4(aq)
*     formula= KH2PO4(0)
      charge=  0.0      ion size=  3.4 A      mole wt.=  136.0860 g
      2 species in reaction
      1.0000 K+           1.0000 H2PO4-           
      -0.4400    -0.4400    -0.4400    -0.4400
      -0.4400    -0.4400    -0.4400    -0.4400
*    References DGf or LogK 97smi/mar ; DHf n/a
*    S° n/a ; Cp n/a


KHAsO4-
*     formula= KHAsO4-
      charge=  -1.0      ion size=  3.6 A      mole wt.=  179.0250 g
      3 species in reaction
      1.0000 H2AsO4-           1.0000 K+           -1.0000 H+           
      6.6081    6.4338    6.2777    6.1916
      6.1734    6.2142    6.2845    6.3603
*    References DGf or LogK 07mar/acc ; DHf n/a
*    S° 07mar/acc ; Cp 07mar/acc


KHPO4-
*     formula= KHPO4-
      charge=  -1.0      ion size=  3.6 A      mole wt.=  135.0780 g
      3 species in reaction
      1.0000 K+           1.0000 H2PO4-           -1.0000 H+           
      6.9327    6.4320    5.8483    5.3130
      4.7708    4.3005    3.8292    3.2431
*    References DGf or LogK 89mar/smi ; DHf 97smi/mar
*    S° n/a ; Cp n/a


KI(aq)
*     formula= KI(0)
      charge=  0.0      ion size=  3.4 A      mole wt.=  166.0030 g
      2 species in reaction
      1.0000 I-           1.0000 K+           
      1.7266    1.6063    1.4241    1.2042
      0.9096    0.5811    0.1905    -0.3321
*    References DGf or LogK 97sve/sho ; DHf n/a
*    S° 97sve/sho ; Cp 97sve/sho


KOH(aq)
*     formula= KOH(0)
      charge=  0.0      ion size=  3.4 A      mole wt.=  56.1060 g
      3 species in reaction
      1.0000 K+           1.0000 H2O           -1.0000 H+           
      15.5415    14.4610    13.2640    12.2259
      11.2693    10.5696    10.0413    9.6232
*    References DGf or LogK 76bae/mes ; DHf n/a
*    S° 97apok/hel ; Cp 97apok/hel


KP2O7---
*     formula= KP2O7-3
      charge=  -3.0      ion size=  6.7 A      mole wt.=  213.0420 g
      4 species in reaction
      1.0000 K+           2.0000 H2PO4-           -1.0000 H2O
      -2.0000 H+           
      16.3155    15.7090    14.9487    14.1930
      13.3524    12.5464    11.6659    10.4966
*    References DGf or LogK 76smi/mar ; DHf 76smi/mar
*    S° n/a ; Cp n/a


KPO4--
*     formula= KPO4(-2)
      charge=  -2.0      ion size=  4.7 A      mole wt.=  134.0700 g
      3 species in reaction
      1.0000 K+           1.0000 H2PO4-           -2.0000 H+           
      18.2600    18.2600    18.2600    18.2600
      18.2600    18.2600    18.2600    18.2600
*    References DGf or LogK 97smi/mar ; DHf n/a
*    S° n/a ; Cp n/a


KSO4-
*     formula= KSO4(-)
      charge=  -1.0      ion size=  3.6 A      mole wt.=  135.1620 g
      2 species in reaction
      1.0000 K+           1.0000 SO4--           
      -0.8820    -0.8800    -0.9909    -1.1953
      -1.5258    -1.9342    -2.4464    -3.1416
*    References DGf or LogK 97sve/sho ; DHf n/a
*    S° 97sve/sho ; Cp 97sve/sho


LaCl++
*     formula= LaCl+2
      charge=  2.0      ion size=  5.7 A      mole wt.=  174.3580 g
      2 species in reaction
      1.0000 Cl-           1.0000 La+++           
      -0.1527    -0.3211    -0.6529    -1.0940
      -1.7005    -2.3637    -3.1090    -4.0103
*    References DGf or LogK 95haa/sho ; DHf n/a
*    S° 95haa/sho ; Cp 95haa/sho


LaCl2+
*     formula= LaCl2+
      charge=  1.0      ion size=  4.1 A      mole wt.=  209.8100 g
      2 species in reaction
      2.0000 Cl-           1.0000 La+++           
      0.2480    0.0175    -0.4368    -1.0502
      -1.9187    -2.9077    -4.0742    -5.5677
*    References DGf or LogK 95haa/sho ; DHf n/a
*    S° 95haa/sho ; Cp 95haa/sho


LaCl3(aq)
*     formula= LaCl3(aq)
      charge=  0.0      ion size=  3.4 A      mole wt.=  245.2630 g
      2 species in reaction
      3.0000 Cl-           1.0000 La+++           
      0.4899    0.3561    0.0487    -0.4130
      -1.1438    -2.0761    -3.3023    -5.0493
*    References DGf or LogK 95haa/sho ; DHf n/a
*    S° 95haa/sho ; Cp 95haa/sho


LaCl4-
*     formula= LaCl4-
      charge=  -1.0      ion size=  3.6 A      mole wt.=  280.7150 g
      2 species in reaction
      4.0000 Cl-           1.0000 La+++           
      0.6296    0.7680    0.8917    0.9308
      0.8079    0.4562    -0.2134    -1.4213
*    References DGf or LogK 95haa/sho ; DHf n/a
*    S° 95haa/sho ; Cp 95haa/sho


LaCO3+
*     formula= LaCO3+
      charge=  1.0      ion size=  4.1 A      mole wt.=  198.9140 g
      3 species in reaction
      1.0000 HCO3-           1.0000 La+++           -1.0000 H+           
      3.1930    3.1954    3.2445    3.3255
      3.4177    3.4584    3.3952    3.1255
*    References DGf or LogK 95haa/sho ; DHf n/a
*    S° 95haa/sho ; Cp 95haa/sho


LaF++
*     formula= LaF+2
      charge=  2.0      ion size=  5.7 A      mole wt.=  157.9040 g
      2 species in reaction
      1.0000 F-           1.0000 La+++           
      -3.5321    -3.8954    -4.4546    -5.1030
      -5.9155    -6.7486    -7.6448    -8.6878
*    References DGf or LogK 95haa/sho ; DHf n/a
*    S° 95haa/sho ; Cp 95haa/sho


LaF2+
*     formula= LaF2+
      charge=  1.0      ion size=  4.1 A      mole wt.=  176.9020 g
      2 species in reaction
      2.0000 F-           1.0000 La+++           
      -6.5367    -6.7646    -7.2273    -7.8496
      -8.7286    -9.7339    -10.9307    -12.4735
*    References DGf or LogK 95haa/sho ; DHf n/a
*    S° 95haa/sho ; Cp 95haa/sho


LaF3(aq)
*     formula= LaF3(aq)
      charge=  0.0      ion size=  3.4 A      mole wt.=  195.9010 g
      2 species in reaction
      3.0000 F-           1.0000 La+++           
      -8.9173    -8.8275    -8.9006    -9.1554
      -9.6911    -10.4875    -11.6346    -13.3579
*    References DGf or LogK 95haa/sho ; DHf n/a
*    S° 95haa/sho ; Cp 95haa/sho


LaF4-
*     formula= LaF4-
      charge=  -1.0      ion size=  3.6 A      mole wt.=  214.8990 g
      2 species in reaction
      4.0000 F-           1.0000 La+++           
      -11.2226    -10.5239    -9.7953    -9.2169
      -8.8160    -8.7667    -9.1384    -10.1534
*    References DGf or LogK 95haa/sho ; DHf n/a
*    S° 95haa/sho ; Cp 95haa/sho


LaH2PO4++
*     formula= LaH2PO4+2
      charge=  2.0      ion size=  5.7 A      mole wt.=  235.8930 g
      2 species in reaction
      1.0000 La+++           1.0000 H2PO4-           
      -1.5364    -1.3297    -1.2757    -1.3933
      -1.7021    -2.1414    -2.7081    -3.4581
*    References DGf or LogK 95haa/sho ; DHf n/a
*    S° 95haa/sho ; Cp 95haa/sho


LaHCO3++
*     formula= LaHCO3+2
      charge=  2.0      ion size=  5.7 A      mole wt.=  199.9220 g
      2 species in reaction
      1.0000 HCO3-           1.0000 La+++           
      -1.9744    -2.0089    -2.2285    -2.5944
      -3.1489    -3.7864    -4.5201    -5.4139
*    References DGf or LogK 95haa/sho ; DHf n/a
*    S° 95haa/sho ; Cp 95haa/sho


LaNO3++
*     formula= LaNO3+2
      charge=  2.0      ion size=  5.7 A      mole wt.=  200.9100 g
      2 species in reaction
      1.0000 La+++           1.0000 NO3-           
      -1.1242    -0.5813    -0.1226    0.1490
      0.2486    0.1582    -0.0984    -0.5607
*    References DGf or LogK 95haa/sho ; DHf n/a
*    S° 95haa/sho ; Cp 95haa/sho


LaO+
*     formula= LaO+
      charge=  1.0      ion size=  4.1 A      mole wt.=  154.9050 g
      3 species in reaction
      1.0000 La+++           1.0000 H2O           -2.0000 H+           
      20.7668    18.1632    15.2973    12.7891
      10.4185    8.6054    7.1497    5.9137
*    References DGf or LogK 95haa/sho ; DHf n/a
*    S° 95haa/sho ; Cp 95haa/sho


LaO2-
*     formula= LaO2-
      charge=  -1.0      ion size=  3.6 A      mole wt.=  170.9040 g
      3 species in reaction
      1.0000 La+++           2.0000 H2O           -4.0000 H+           
      45.6773    40.7978    35.4345    30.7638
      26.4036    23.1564    20.6773    18.7742
*    References DGf or LogK 95haa/sho ; DHf n/a
*    S° 95haa/sho ; Cp 95haa/sho


LaO2H(aq)
*     formula= LaO2H(aq)
      charge=  0.0      ion size=  3.4 A      mole wt.=  171.9120 g
      3 species in reaction
      1.0000 La+++           2.0000 H2O           -3.0000 H+           
      31.8213    27.8970    23.6787    20.0895
      16.8154    14.4185    12.5819    11.0879
*    References DGf or LogK 95haa/sho ; DHf n/a
*    S° 95haa/sho ; Cp 95haa/sho


LaOH++
*     formula= LaOH+2
      charge=  2.0      ion size=  5.7 A      mole wt.=  155.9130 g
      3 species in reaction
      1.0000 La+++           1.0000 H2O           -1.0000 H+           
      10.0077    8.6342    7.0833    5.6943
      4.3505    3.2983    2.4368    1.6975
*    References DGf or LogK 95haa/sho ; DHf n/a
*    S° 95haa/sho ; Cp 95haa/sho


LaSO4+
*     formula= LaSO4+
      charge=  1.0      ion size=  4.1 A      mole wt.=  234.9690 g
      2 species in reaction
      1.0000 La+++           1.0000 SO4--           
      -3.4644    -3.7227    -4.0940    -4.5104
      -5.0491    -5.6619    -6.4342    -7.5333
*    References DGf or LogK 95haa/sho ; DHf n/a
*    S° 95haa/sho ; Cp 95haa/sho


LiCl(aq)
*     formula= LiCl(0)
      charge=  0.0      ion size=  3.4 A      mole wt.=  42.3930 g
      2 species in reaction
      1.0000 Cl-           1.0000 Li+           
      1.5424    1.4989    1.3712    1.1720
      0.8642    0.4898    0.0229    -0.6119
*    References DGf or LogK 97sve/sho ; DHf n/a
*    S° 97sve/sho ; Cp 97sve/sho


LiOH(aq)
*     formula= LiOH(0)
      charge=  0.0      ion size=  3.4 A      mole wt.=  23.9480 g
      3 species in reaction
      1.0000 Li+           1.0000 H2O           -1.0000 H+           
      14.5646    13.6428    12.6440    11.7925
      11.0169    10.4512    10.0179    9.6597
*    References DGf or LogK 97asho/sas ; DHf n/a
*    S° 97asho/sas ; Cp 97asho/sas


LuCl++
*     formula= LuCl+2
      charge=  2.0      ion size=  5.7 A      mole wt.=  210.4190 g
      2 species in reaction
      1.0000 Cl-           1.0000 Lu+++           
      0.1983    0.0454    -0.2852    -0.7407
      -1.3785    -2.0824    -2.8745    -3.8258
*    References DGf or LogK 95haa/sho ; DHf n/a
*    S° 95haa/sho ; Cp 95haa/sho


LuCl2+
*     formula= LuCl2+
      charge=  1.0      ion size=  4.1 A      mole wt.=  245.8720 g
      2 species in reaction
      2.0000 Cl-           1.0000 Lu+++           
      0.7600    0.6039    0.1927    -0.4193
      -1.3264    -2.3801    -3.6269    -5.2103
*    References DGf or LogK 95haa/sho ; DHf n/a
*    S° 95haa/sho ; Cp 95haa/sho


LuCl3(aq)
*     formula= LuCl3(aq)
      charge=  0.0      ion size=  3.4 A      mole wt.=  281.3240 g
      2 species in reaction
      3.0000 Cl-           1.0000 Lu+++           
      1.1229    1.1624    0.9761    0.5535
      -0.2166    -1.2490    -2.6144    -4.5243
*    References DGf or LogK 95haa/sho ; DHf n/a
*    S° 95haa/sho ; Cp 95haa/sho


LuCl4-
*     formula= LuCl4-
      charge=  -1.0      ion size=  3.6 A      mole wt.=  316.7770 g
      2 species in reaction
      4.0000 Cl-           1.0000 Lu+++           
      1.2399    1.7209    2.1123    2.2848
      2.1802    1.7509    0.9472    -0.4334
*    References DGf or LogK 95haa/sho ; DHf n/a
*    S° 95haa/sho ; Cp 95haa/sho


LuCO3+
*     formula= LuCO3+
      charge=  1.0      ion size=  4.1 A      mole wt.=  234.9760 g
      3 species in reaction
      1.0000 HCO3-           1.0000 Lu+++           -1.0000 H+           
      1.8642    2.0226    2.2491    2.4900
      2.7359    2.8928    2.9162    2.7049
*    References DGf or LogK 95haa/sho ; DHf n/a
*    S° 95haa/sho ; Cp 95haa/sho


LuF++
*     formula= LuF+2
      charge=  2.0      ion size=  5.7 A      mole wt.=  193.9650 g
      2 species in reaction
      1.0000 F-           1.0000 Lu+++           
      -4.5031    -4.8483    -5.4031    -6.0634
      -6.9063    -7.7815    -8.7283    -9.8261
*    References DGf or LogK 95haa/sho ; DHf n/a
*    S° 95haa/sho ; Cp 95haa/sho


LuF2+
*     formula= LuF2+
      charge=  1.0      ion size=  4.1 A      mole wt.=  212.9640 g
      2 species in reaction
      2.0000 F-           1.0000 Lu+++           
      -8.3968    -8.5238    -8.9127    -9.5063
      -10.3993    -11.4536    -12.7223    -14.3511
*    References DGf or LogK 95haa/sho ; DHf n/a
*    S° 95haa/sho ; Cp 95haa/sho


LuF3(aq)
*     formula= LuF3(aq)
      charge=  0.0      ion size=  3.4 A      mole wt.=  231.9620 g
      2 species in reaction
      3.0000 F-           1.0000 Lu+++           
      -11.5291    -11.2193    -11.1178    -11.2845
      -11.8114    -12.6698    -13.9255    -15.7862
*    References DGf or LogK 95haa/sho ; DHf n/a
*    S° 95haa/sho ; Cp 95haa/sho


LuF4-
*     formula= LuF4-
      charge=  -1.0      ion size=  3.6 A      mole wt.=  250.9610 g
      2 species in reaction
      4.0000 F-           1.0000 Lu+++           
      -14.5685    -13.4559    -12.3775    -11.5916
      -11.1030    -11.0829    -11.5596    -12.7398
*    References DGf or LogK 95haa/sho ; DHf n/a
*    S° 95haa/sho ; Cp 95haa/sho


LuH2PO4++
*     formula= LuH2PO4+2
      charge=  2.0      ion size=  5.7 A      mole wt.=  271.9540 g
      2 species in reaction
      1.0000 Lu+++           1.0000 H2PO4-           
      -1.4835    -1.1831    -1.0382    -1.0880
      -1.3466    -1.7608    -2.3197    -3.0743
*    References DGf or LogK 95haa/sho ; DHf n/a
*    S° 95haa/sho ; Cp 95haa/sho


LuHCO3++
*     formula= LuHCO3+2
      charge=  2.0      ion size=  5.7 A      mole wt.=  235.9840 g
      2 species in reaction
      1.0000 HCO3-           1.0000 Lu+++           
      -1.9955    -1.9356    -2.0635    -2.3609
      -2.8646    -3.4765    -4.2015    -5.0965
*    References DGf or LogK 95haa/sho ; DHf n/a
*    S° 95haa/sho ; Cp 95haa/sho


LuNO3++
*     formula= LuNO3+2
      charge=  2.0      ion size=  5.7 A      mole wt.=  236.9720 g
      2 species in reaction
      1.0000 Lu+++           1.0000 NO3-           
      -1.3274    -0.5813    0.0938    0.5482
      0.8124    0.8389    0.6662    0.2617
*    References DGf or LogK 95haa/sho ; DHf n/a
*    S° 95haa/sho ; Cp 95haa/sho


LuO+
*     formula= LuO+
      charge=  1.0      ion size=  4.1 A      mole wt.=  190.9660 g
      3 species in reaction
      1.0000 Lu+++           1.0000 H2O           -2.0000 H+           
      17.5392    15.3045    12.8310    10.6533
      8.5787    6.9745    5.6693    4.5471
*    References DGf or LogK 95haa/sho ; DHf n/a
*    S° 95haa/sho ; Cp 95haa/sho


LuO2-
*     formula= LuO2-
      charge=  -1.0      ion size=  3.6 A      mole wt.=  206.9660 g
      3 species in reaction
      1.0000 Lu+++           2.0000 H2O           -4.0000 H+           
      35.8263    31.9285    27.6173    23.8404
      20.2906    17.6258    15.5766    14.0065
*    References DGf or LogK 95haa/sho ; DHf n/a
*    S° 95haa/sho ; Cp 95haa/sho


LuO2H(aq)
*     formula= LuO2H(aq)
      charge=  0.0      ion size=  3.4 A      mole wt.=  207.9740 g
      3 species in reaction
      1.0000 Lu+++           2.0000 H2O           -3.0000 H+           
      27.2718    23.8655    20.1642    16.9761
      14.0195    11.8047    10.0579    8.5915
*    References DGf or LogK 95haa/sho ; DHf n/a
*    S° 95haa/sho ; Cp 95haa/sho


LuOH++
*     formula= LuOH+2
      charge=  2.0      ion size=  5.7 A      mole wt.=  191.9740 g
      3 species in reaction
      1.0000 Lu+++           1.0000 H2O           -1.0000 H+           
      8.8036    7.6080    6.2332    4.9795
      3.7417    2.7498    1.9189    1.1924
*    References DGf or LogK 95haa/sho ; DHf n/a
*    S° 95haa/sho ; Cp 95haa/sho


LuSO4+
*     formula= LuSO4+
      charge=  1.0      ion size=  4.1 A      mole wt.=  271.0310 g
      2 species in reaction
      1.0000 Lu+++           1.0000 SO4--           
      -3.3802    -3.6494    -4.0486    -4.5085
      -5.1128    -5.7998    -6.6527    -7.8371
*    References DGf or LogK 95haa/sho ; DHf n/a
*    S° 95haa/sho ; Cp 95haa/sho


Mg(HCO3)+
*     formula= Mg(HCO3)(+)
      charge=  1.0      ion size=  4.1 A      mole wt.=  85.3220 g
      2 species in reaction
      1.0000 HCO3-           1.0000 Mg++           
      -1.0813    -1.0380    -1.1556    -1.4122
      -1.8398    -2.3604    -2.9862    -3.7799
*    References DGf or LogK 06bla/pia ; DHf n/a
*    S° 74rea/lan ; Cp 95sho/kor


Mg4(OH)4++++
*     formula= Mg4(OH)4+4
      charge=  4.0      ion size=  11.6 A      mole wt.=  165.2490 g
      3 species in reaction
      4.0000 Mg++           4.0000 H2O           -4.0000 H+           
      43.3617    39.7541    35.4575    31.3822
      27.1509    23.5373    20.2710    17.1315
*    References DGf or LogK 76bae/mes ; DHf n/a
*    S° 99yun/glu ; Cp n/a


MgAsO4-
*     formula= MgAsO4-
      charge=  -1.0      ion size=  3.6 A      mole wt.=  163.2240 g
      3 species in reaction
      1.0000 H2AsO4-           1.0000 Mg++           -2.0000 H+           
      14.4035    12.7346    10.9952    9.5848
      8.3795    7.5638    6.9802    6.5212
*    References DGf or LogK 07mar/acc ; DHf n/a
*    S° 07mar/acc ; Cp 07mar/acc


MgCl+
*     formula= MgCl(+)
      charge=  1.0      ion size=  4.1 A      mole wt.=  59.7570 g
      2 species in reaction
      1.0000 Cl-           1.0000 Mg++           
      -0.4342    -0.3500    -0.3867    -0.5484
      -0.8661    -1.2885    -1.8281    -2.5505
*    References DGf or LogK 96bou ; DHf n/a
*    S° 97sve/sho ; Cp 97sve/sho


MgCO3(aq)
*     formula= MgCO3(0)
      charge=  0.0      ion size=  3.4 A      mole wt.=  84.3140 g
      3 species in reaction
      1.0000 HCO3-           1.0000 Mg++           -1.0000 H+           
      7.7385    7.3470    6.9339    6.5850
      6.2400    5.9162    5.5341    4.9837
*    References DGf or LogK 06bla/pia ; DHf n/a
*    S° 74rea/lan ; Cp 97sve/sho


MgF+
*     formula= MgF(+)
      charge=  1.0      ion size=  4.1 A      mole wt.=  43.3030 g
      2 species in reaction
      1.0000 F-           1.0000 Mg++           
      -1.1635    -1.1486    -1.2919    -1.5700
      -2.0205    -2.5645    -3.2196    -4.0578
*    References DGf or LogK 97sve/sho ; DHf n/a
*    S° 97sve/sho ; Cp 97sve/sho


MgH2AsO3+
*     formula= MgH2AsO3+
      charge=  1.0      ion size=  4.1 A      mole wt.=  149.2410 g
      2 species in reaction
      1.0000 H2AsO3-           1.0000 Mg++           
      -2.0099    -1.6740    -1.2605    -0.8454
      -0.4065    -0.0608    0.1721    0.2411
*    References DGf or LogK 07mar/acc ; DHf n/a
*    S° 07mar/acc ; Cp 07mar/acc


MgH2AsO4+
*     formula= MgH2AsO4+
      charge=  1.0      ion size=  4.1 A      mole wt.=  165.2400 g
      2 species in reaction
      1.0000 H2AsO4-           1.0000 Mg++           
      -1.8085    -1.5120    -1.2703    -1.1296
      -1.0878    -1.1681    -1.3788    -1.7773
*    References DGf or LogK 07mar/acc ; DHf n/a
*    S° 07mar/acc ; Cp 07mar/acc


MgH2PO4+
*     formula= MgH2PO4+
      charge=  1.0      ion size=  4.1 A      mole wt.=  121.2920 g
      2 species in reaction
      1.0000 Mg++           1.0000 H2PO4-           
      -0.9660    -1.1700    -1.4275    -1.6789
      -1.9673    -2.2761    -2.6663    -3.2359
*    References DGf or LogK 81tur/whi ; DHf 96bou
*    S° n/a ; Cp n/a


MgHAsO4
*     formula= MgHAsO4
      charge=  0.0      ion size=  3.4 A      mole wt.=  164.2320 g
      3 species in reaction
      1.0000 H2AsO4-           1.0000 Mg++           -1.0000 H+           
      4.7056    4.5389    4.3460    4.1646
      3.9511    3.7047    3.3674    2.8435
*    References DGf or LogK 07mar/acc ; DHf n/a
*    S° 07mar/acc ; Cp 07mar/acc


MgHPO4(aq)
*     formula= MgHPO4(0)
      charge=  0.0      ion size=  3.4 A      mole wt.=  120.2840 g
      3 species in reaction
      1.0000 Mg++           1.0000 H2PO4-           -1.0000 H+           
      4.5488    4.3025    3.9963    3.7006
      3.3685    3.0252    2.6071    2.0146
*    References DGf or LogK 63tay/fra, 76smi/mar ; DHf 76smi/mar
*    S° n/a ; Cp n/a


MgOH+
*     formula= MgOH(+)
      charge=  1.0      ion size=  4.1 A      mole wt.=  41.3120 g
      3 species in reaction
      1.0000 Mg++           1.0000 H2O           -1.0000 H+           
      12.6686    11.6810    10.5068    9.4098
      8.3061    7.4093    6.6510    5.9794
*    References DGf or LogK 97sve/sho ; DHf n/a
*    S° 97asho/sas ; Cp 97asho/sas


MgP2O7--
*     formula= MgP2O7-2
      charge=  -2.0      ion size=  4.7 A      mole wt.=  198.2480 g
      4 species in reaction
      1.0000 Mg++           2.0000 H2PO4-           -1.0000 H2O
      -2.0000 H+           
      11.2959    10.6090    9.7420    8.8750
      7.8991    6.9478    5.9002    4.5426
*    References DGf or LogK 76smi/mar ; DHf 76smi/mar
*    S° n/a ; Cp n/a


MgPO4-
*     formula= MgPO4-
      charge=  -1.0      ion size=  3.6 A      mole wt.=  119.2760 g
      3 species in reaction
      1.0000 Mg++           1.0000 H2PO4-           -2.0000 H+           
      15.1971    14.7100    14.1274    13.5793
      12.9986    12.4574    11.8716    11.1144
*    References DGf or LogK 81tur/whi ; DHf 96bou
*    S° n/a ; Cp n/a


MgSO4
*     formula= MgSO4
      charge=  0.0      ion size=  3.4 A      mole wt.=  120.3690 g
      2 species in reaction
      1.0000 Mg++           1.0000 SO4--           
      -2.1799    -2.2300    -2.3882    -2.6328
      -3.0280    -3.5525    -4.2772    -5.3606
*    References DGf or LogK 76smi/mar ; DHf 76smi/mar
*    S° n/a ; Cp 97mcc/sho


MnAsO4-
*     formula= MnAsO4-
      charge=  -1.0      ion size=  3.6 A      mole wt.=  193.8570 g
      3 species in reaction
      1.0000 H2AsO4-           1.0000 Mn++           -2.0000 H+           
      13.6671    12.3298    10.9696    9.8995
      9.0208    8.4556    8.0695    7.7682
*    References DGf or LogK 07mar/acc ; DHf n/a
*    S° 07mar/acc ; Cp 07mar/acc


MnCl+
*     formula= MnCl(+)
      charge=  1.0      ion size=  4.1 A      mole wt.=  90.3900 g
      2 species in reaction
      1.0000 Cl-           1.0000 Mn++           
      0.3772    0.1260    -0.2923    -0.8069
      -1.4841    -2.2070    -3.0096    -3.9712
*    References DGf or LogK 97sve/sho ; DHf n/a
*    S° 97sve/sho ; Cp 97sve/sho


MnF+
*     formula= MnF(1)
      charge=  1.0      ion size=  4.1 A      mole wt.=  73.9360 g
      2 species in reaction
      1.0000 F-           1.0000 Mn++           
      -0.9377    -0.9201    -1.0350    -1.2701
      -1.6652    -2.1571    -2.7647    -3.5579
*    References DGf or LogK 97sve/sho ; DHf n/a
*    S° 97sve/sho ; Cp 97sve/sho


MnH2AsO4+
*     formula= MnH2AsO4+
      charge=  1.0      ion size=  4.1 A      mole wt.=  195.8730 g
      2 species in reaction
      1.0000 H2AsO4-           1.0000 Mn++           
      -1.0949    -1.0057    -1.0210    -1.1428
      -1.3971    -1.7489    -2.2153    -2.8613
*    References DGf or LogK 07mar/acc ; DHf n/a
*    S° 07mar/acc ; Cp 07mar/acc


MnH2PO4+
*     formula= MnH2PO4+
      charge=  1.0      ion size=  4.1 A      mole wt.=  151.9250 g
      2 species in reaction
      1.0000 Mn++           1.0000 H2PO4-           
      -1.3434    -1.3434    -1.3434    -1.3434
      -1.3434    -1.3434    -1.3434    -1.3434
*    References DGf or LogK 79mat/spo ; DHf n/a
*    S° n/a ; Cp n/a


MnHAsO4
*     formula= MnHAsO4
      charge=  0.0      ion size=  3.4 A      mole wt.=  194.8650 g
      3 species in reaction
      1.0000 H2AsO4-           1.0000 Mn++           -1.0000 H+           
      4.2145    4.0652    3.8920    3.7241
      3.5178    3.2724    2.9337    2.4068
*    References DGf or LogK 07mar/acc ; DHf n/a
*    S° 07mar/acc ; Cp 07mar/acc


MnHPO4(aq)
*     formula= MnHPO4(0)
      charge=  0.0      ion size=  3.4 A      mole wt.=  150.9170 g
      3 species in reaction
      1.0000 Mn++           1.0000 H2PO4-           -1.0000 H+           
      3.6320    3.6320    3.6320    3.6320
      3.6320    3.6320    3.6320    3.6320
*    References DGf or LogK 79mat/spo ; DHf n/a
*    S° n/a ; Cp n/a


MnO(aq)
*     formula= MnO(+0)
      charge=  0.0      ion size=  3.4 A      mole wt.=  70.9370 g
      3 species in reaction
      1.0000 Mn++           1.0000 H2O           -2.0000 H+           
      24.1918    22.1947    19.9661    17.9893
      16.0915    14.6129    13.3994    12.3386
*    References DGf or LogK 97asho/sas ; DHf n/a
*    S° 97asho/sas ; Cp 97asho/sas


MnO2--
*     formula= MnO2(-2)
      charge=  -2.0      ion size=  4.7 A      mole wt.=  86.9370 g
      3 species in reaction
      1.0000 Mn++           2.0000 H2O           -4.0000 H+           
      52.1383    48.2744    44.0727    40.4783
      37.2323    34.9645    33.4361    32.5821
*    References DGf or LogK 97asho/sas ; DHf n/a
*    S° 97asho/sas ; Cp 97asho/sas


MnOH+
*     formula= MnOH(+1)
      charge=  1.0      ion size=  4.1 A      mole wt.=  71.9450 g
      3 species in reaction
      1.0000 Mn++           1.0000 H2O           -1.0000 H+           
      11.5845    10.6133    9.5119    8.5234
      7.5635    6.8062    6.1764    5.6202
*    References DGf or LogK 97asho/sas ; DHf n/a
*    S° 97asho/sas ; Cp 97asho/sas


MnPO4-
*     formula= MnPO4-
      charge=  -1.0      ion size=  3.6 A      mole wt.=  149.9090 g
      3 species in reaction
      1.0000 Mn++           1.0000 H2PO4-           -2.0000 H+           
      12.3438    12.3438    12.3438    12.3438
      12.3438    12.3438    12.3438    12.3438
*    References DGf or LogK 79mat/spo ; DHf n/a
*    S° n/a ; Cp n/a


MnSO4(aq)
*     formula= MnSO4(0)
      charge=  0.0      ion size=  3.4 A      mole wt.=  151.0020 g
      2 species in reaction
      1.0000 Mn++           1.0000 SO4--           
      -1.8825    -1.9928    -2.2200    -2.5318
      -2.9994    -3.5855    -4.3630    -5.4931
*    References DGf or LogK 97sve/sho ; DHf n/a
*    S° 97sve/sho ; Cp 97sve/sho


N2H5+
*     formula= N2H5+
      charge=  1.0      ion size=  4.1 A      mole wt.=  33.0530 g
      3 species in reaction
      1.3333 NH3(aq)           0.3333 N2(aq)           1.0000 H+           
      21.3096    19.6163    17.7241    16.0743
      14.5530    13.4508    12.6460    12.0697
*    References DGf or LogK 97asho/sas ; DHf n/a
*    S° 97asho/sas ; Cp 97asho/sas


N2H6++
*     formula= N2H6+2
      charge=  2.0      ion size=  5.7 A      mole wt.=  34.0610 g
      3 species in reaction
      1.3333 NH3(aq)           0.3333 N2(aq)           2.0000 H+           
      22.1878    20.6425    18.9215    17.4334
      16.0857    15.1446    14.5065    14.1257
*    References DGf or LogK 97asho/sas ; DHf n/a
*    S° 97asho/sas ; Cp 97asho/sas


N2O(aq)
*     formula= N2O(0)
      charge=  0.0      ion size=  3.4 A      mole wt.=  44.0130 g
      4 species in reaction
      0.6667 N2(aq)           0.6667 NO2-           0.6667 H+
      -0.3333 H2O           
      8.3550    7.6542    6.8721    6.1519
      5.4107    4.7744    4.1850    3.5739
*    References DGf or LogK 01sch/sho ; DHf n/a
*    S° 01sch/sho ; Cp 01sch/sho


N2O2--
*     formula= N2O2-2
      charge=  -2.0      ion size=  4.7 A      mole wt.=  60.0120 g
      4 species in reaction
      0.6667 N2(aq)           0.6667 NO2-           0.6667 H2O
      -1.3333 H+           
      57.8814    53.6714    49.0481    45.0379
      41.3475    38.7009    36.8445    35.6939
*    References DGf or LogK 97asho/sas ; DHf n/a
*    S° 97asho/sas ; Cp 97asho/sas


Na2P2O7--
*     formula= Na2P2O7-2
      charge=  -2.0      ion size=  4.7 A      mole wt.=  219.9230 g
      4 species in reaction
      2.0000 Na+           2.0000 H2PO4-           -1.0000 H2O
      -2.0000 H+           
      13.6200    13.6200    13.6200    13.6200
      13.6200    13.6200    13.6200    13.6200
*    References DGf or LogK 76smi/mar ; DHf n/a
*    S° n/a ; Cp n/a


NaAlO2(aq)
*     formula= NaAlO2(0)
      charge=  0.0      ion size=  3.4 A      mole wt.=  81.9700 g
      4 species in reaction
      1.0000 Al+++           1.0000 Na+           2.0000 H2O
      -4.0000 H+           
      26.6549    23.6308    20.1008    16.8305
      13.5386    10.8363    8.5047    6.3832
*    References DGf or LogK n/a ; DHf 95pok/hel
*    S° 95pok/hel ; Cp 95pok/hel


NaAsO4--
*     formula= NaAsO4-2
      charge=  -2.0      ion size=  4.7 A      mole wt.=  161.9090 g
      3 species in reaction
      1.0000 H2AsO4-           1.0000 Na+           -2.0000 H+           
      15.3497    13.8671    12.3796    11.2603
      10.4435    10.0660    10.0061    10.2289
*    References DGf or LogK 07mar/acc ; DHf n/a
*    S° 07mar/acc ; Cp 07mar/acc


NaB(OH)4(aq)
*     formula= NaB(OH)4(0)
      charge=  0.0      ion size=  3.0 A      mole wt.=  101.8300 g
      4 species in reaction
      1.0000 B(OH)3(aq)           1.0000 Na+           1.0000 H2O
      -1.0000 H+           
      9.2145    8.9774    8.7468    8.5550
      8.3697    8.2145    8.0685    7.9108
*    References DGf or LogK 95pok/sch ; DHf n/a
*    S° 95pok/sch ; Cp 95pok/sch


NaBr(aq)
*     formula= NaBr(0)
      charge=  0.0      ion size=  3.4 A      mole wt.=  102.8940 g
      2 species in reaction
      1.0000 Br-           1.0000 Na+           
      1.4737    1.3694    1.1856    0.9563
      0.6475    0.3011    -0.1167    -0.6864
*    References DGf or LogK 97sve/sho ; DHf n/a
*    S° 97sve/sho ; Cp 97sve/sho


NaCO3-
*     formula= NaCO3(-1)
      charge=  -1.0      ion size=  3.6 A      mole wt.=  82.9990 g
      3 species in reaction
      1.0000 HCO3-           1.0000 Na+           -1.0000 H+           
      9.6354    9.0570    8.5556    8.2960
      8.2628    8.4053    8.6054    8.7363
*    References DGf or LogK 90nor/plu ; DHf n/a
*    S° 13ste/ben ; Cp n/a


NaF(aq)
*     formula= NaF(0)
      charge=  0.0      ion size=  3.4 A      mole wt.=  41.9880 g
      2 species in reaction
      1.0000 F-           1.0000 Na+           
      1.0579    0.9704    0.8065    0.5973
      0.3078    -0.0283    -0.4478    -1.0318
*    References DGf or LogK 97sve/sho ; DHf n/a
*    S° 97sve/sho ; Cp 97sve/sho


NaH2AsO3
*     formula= NaH2AsO3
      charge=  0.0      ion size=  3.4 A      mole wt.=  147.9250 g
      2 species in reaction
      1.0000 H2AsO3-           1.0000 Na+           
      -0.3808    -0.2732    -0.0911    0.1351
      0.4123    0.6553    0.8309    0.8770
*    References DGf or LogK 07mar/acc ; DHf n/a
*    S° 07mar/acc ; Cp 07mar/acc


NaH2AsO4
*     formula= NaH2AsO4
      charge=  0.0      ion size=  3.4 A      mole wt.=  163.9250 g
      2 species in reaction
      1.0000 H2AsO4-           1.0000 Na+           
      1.9058    1.7880    1.5853    1.3434
      1.0340    0.7025    0.3156    -0.2030
*    References DGf or LogK 07mar/acc ; DHf n/a
*    S° 07mar/acc ; Cp 07mar/acc


NaH2PO4(aq)
*     formula= NaH2PO4(0)
      charge=  0.0      ion size=  3.4 A      mole wt.=  119.9770 g
      2 species in reaction
      1.0000 Na+           1.0000 H2PO4-           
      -0.4100    -0.4100    -0.4100    -0.4100
      -0.4100    -0.4100    -0.4100    -0.4100
*    References DGf or LogK 97smi/mar ; DHf n/a
*    S° n/a ; Cp n/a


NaHAsO4-
*     formula= NaHAsO4-
      charge=  -1.0      ion size=  3.6 A      mole wt.=  162.9170 g
      3 species in reaction
      1.0000 H2AsO4-           1.0000 Na+           -1.0000 H+           
      6.4393    6.2981    6.1866    6.1569
      6.2166    6.3409    6.4982    6.6643
*    References DGf or LogK 07mar/acc ; DHf n/a
*    S° 07mar/acc ; Cp 07mar/acc


NaHCO3(aq)
*     formula= NaHCO3(0)
      charge=  0.0      ion size=  3.4 A      mole wt.=  84.0070 g
      2 species in reaction
      1.0000 HCO3-           1.0000 Na+           
      0.4445    0.2470    0.0432    -0.1052
      -0.2178    -0.3048    -0.4253    -0.6706
*    References DGf or LogK 90nor/plu ; DHf n/a
*    S° 13ste/ben ; Cp n/a


NaHP2O7--
*     formula= NaHP2O7-2
      charge=  -2.0      ion size=  4.7 A      mole wt.=  197.9410 g
      4 species in reaction
      1.0000 Na+           2.0000 H2PO4-           -1.0000 H2O
      -1.0000 H+           
      7.0100    7.0100    7.0100    7.0100
      7.0100    7.0100    7.0100    7.0100
*    References DGf or LogK 76smi/mar ; DHf n/a
*    S° n/a ; Cp n/a


NaHPO4-
*     formula= NaHPO4-
      charge=  -1.0      ion size=  3.6 A      mole wt.=  118.9690 g
      3 species in reaction
      1.0000 Na+           1.0000 H2PO4-           -1.0000 H+           
      6.9000    6.3400    5.7047    5.1435
      4.6015    4.1527    3.7135    3.1622
*    References DGf or LogK 97smi/mar ; DHf 97smi/mar
*    S° n/a ; Cp n/a


NaI(aq)
*     formula= NaI(0)
      charge=  0.0      ion size=  3.4 A      mole wt.=  149.8940 g
      2 species in reaction
      1.0000 I-           1.0000 Na+           
      1.6324    1.5527    1.3969    1.1899
      0.8991    0.5657    0.1621    -0.3837
*    References DGf or LogK 97sve/sho ; DHf n/a
*    S° 97sve/sho ; Cp 97sve/sho


NaOH(aq)
*     formula= NaOH(0)
      charge=  0.0      ion size=  3.4 A      mole wt.=  39.9970 g
      3 species in reaction
      1.0000 Na+           1.0000 H2O           -1.0000 H+           
      15.5987    14.7510    13.7622    12.8514
      11.9402    11.1905    10.5227    9.8408
*    References DGf or LogK 95pok/hel ; DHf n/a
*    S° 95pok/hel ; Cp 95pok/hel


NaP2O7---
*     formula= NaP2O7-3
      charge=  -3.0      ion size=  6.7 A      mole wt.=  196.9330 g
      4 species in reaction
      1.0000 Na+           2.0000 H2PO4-           -1.0000 H2O
      -2.0000 H+           
      16.1110    15.5190    14.7918    14.0877
      13.3234    12.5990    11.7992    10.7048
*    References DGf or LogK 76smi/mar ; DHf 76smi/mar
*    S° n/a ; Cp n/a


NaPO4--
*     formula= NaPO4(-2)
      charge=  -2.0      ion size=  4.7 A      mole wt.=  117.9610 g
      3 species in reaction
      1.0000 Na+           1.0000 H2PO4-           -2.0000 H+           
      18.0700    18.0700    18.0700    18.0700
      18.0700    18.0700    18.0700    18.0700
*    References DGf or LogK 97smi/mar ; DHf n/a
*    S° n/a ; Cp n/a


NaSO4-
*     formula= NaSO4-
      charge=  -1.0      ion size=  4.5 A      mole wt.=  119.0530 g
      2 species in reaction
      1.0000 Na+           1.0000 SO4--           
      -1.0402    -0.9360    -0.9498    -1.0754
      -1.3327    -1.6833    -2.1455    -2.7918
*    References DGf or LogK 95pok/sch ; DHf n/a
*    S° 95pok/sch ; Cp 95pok/sch


NdCl++
*     formula= NdCl+2
      charge=  2.0      ion size=  4.5 A      mole wt.=  179.6920 g
      2 species in reaction
      1.0000 Cl-           1.0000 Nd+++           
      -0.1352    -0.3211    -0.6556    -1.0845
      -1.6657    -2.3004    -3.0182    -3.8939
*    References DGf or LogK 95haa/sho ; DHf n/a
*    S° 95haa/sho ; Cp 95haa/sho


NdCl2+
*     formula= NdCl2+
      charge=  1.0      ion size=  4.5 A      mole wt.=  215.1450 g
      2 species in reaction
      2.0000 Cl-           1.0000 Nd+++           
      0.2122    -0.0558    -0.5062    -1.0750
      -1.8596    -2.7517    -3.8185    -5.2134
*    References DGf or LogK 95haa/sho ; DHf n/a
*    S° 95haa/sho ; Cp 95haa/sho


NdCl3(aq)
*     formula= NdCl3(aq)
      charge=  0.0      ion size=  3.4 A      mole wt.=  250.5970 g
      2 species in reaction
      3.0000 Cl-           1.0000 Nd+++           
      0.4959    0.2828    -0.0270    -0.4123
      -0.9884    -1.7343    -2.7609    -4.3044
*    References DGf or LogK 95haa/sho ; DHf n/a
*    S° 95haa/sho ; Cp 95haa/sho


NdCl4-
*     formula= NdCl4-
      charge=  -1.0      ion size=  3.6 A      mole wt.=  286.0500 g
      2 species in reaction
      4.0000 Cl-           1.0000 Nd+++           
      0.6949    0.6947    0.8022    0.9527
      1.0669    1.0047    0.6458    -0.2455
*    References DGf or LogK 95haa/sho ; DHf n/a
*    S° 95haa/sho ; Cp 95haa/sho


NdCO3+
*     formula= NdCO3+
      charge=  1.0      ion size=  4.1 A      mole wt.=  204.2490 g
      3 species in reaction
      1.0000 HCO3-           1.0000 Nd+++           -1.0000 H+           
      2.5631    2.6090    2.7083    2.8344
      2.9682    3.0376    2.9925    2.7350
*    References DGf or LogK 95haa/sho ; DHf n/a
*    S° 95haa/sho ; Cp 95haa/sho


NdF++
*     formula= NdF+2
      charge=  2.0      ion size=  5.7 A      mole wt.=  163.2380 g
      2 species in reaction
      1.0000 F-           1.0000 Nd+++           
      -4.1006    -4.4085    -4.8866    -5.4463
      -6.1578    -6.9019    -7.7209    -8.6967
*    References DGf or LogK 95haa/sho ; DHf n/a
*    S° 95haa/sho ; Cp 95haa/sho


NdF2+
*     formula= NdF2+
      charge=  1.0      ion size=  4.1 A      mole wt.=  182.2370 g
      2 species in reaction
      2.0000 F-           1.0000 Nd+++           
      -7.4947    -7.6442    -7.9700    -8.4263
      -9.1009    -9.9131    -10.9306    -12.3074
*    References DGf or LogK 95haa/sho ; DHf n/a
*    S° 95haa/sho ; Cp 95haa/sho


NdF3(aq)
*     formula= NdF3(aq)
      charge=  0.0      ion size=  3.4 A      mole wt.=  201.2350 g
      2 species in reaction
      3.0000 F-           1.0000 Nd+++           
      -10.1655    -10.0003    -9.8983    -9.9147
      -10.1361    -10.6202    -11.4661    -12.9018
*    References DGf or LogK 95haa/sho ; DHf n/a
*    S° 95haa/sho ; Cp 95haa/sho


NdF4-
*     formula= NdF4-
      charge=  -1.0      ion size=  3.6 A      mole wt.=  220.2340 g
      2 species in reaction
      4.0000 F-           1.0000 Nd+++           
      -12.7397    -11.9899    -11.0600    -10.1713
      -9.3364    -8.8402    -8.7704    -9.3555
*    References DGf or LogK 95haa/sho ; DHf n/a
*    S° 95haa/sho ; Cp 95haa/sho


NdH2PO4++
*     formula= NdH2PO4+2
      charge=  2.0      ion size=  5.7 A      mole wt.=  241.2270 g
      2 species in reaction
      1.0000 Nd+++           1.0000 H2PO4-           
      -1.2590    -1.1032    -1.0901    -1.2305
      -1.5488    -1.9872    -2.5491    -3.2926
*    References DGf or LogK 95haa/sho ; DHf n/a
*    S° 95haa/sho ; Cp 95haa/sho


NdHCO3++
*     formula= NdHCO3+2
      charge=  2.0      ion size=  5.7 A      mole wt.=  205.2570 g
      2 species in reaction
      1.0000 HCO3-           1.0000 Nd+++           
      -1.7868    -1.8623    -2.1114    -2.4897
      -3.0434    -3.6718    -4.3943    -5.2768
*    References DGf or LogK 95haa/sho ; DHf n/a
*    S° 95haa/sho ; Cp 95haa/sho


NdNO3++
*     formula= NdNO3+2
      charge=  2.0      ion size=  5.7 A      mole wt.=  206.2450 g
      2 species in reaction
      1.0000 NO3-           1.0000 Nd+++           
      -1.3005    -0.7902    -0.3515    -0.0836
      0.0251    -0.0504    -0.2913    -0.7383
*    References DGf or LogK 95haa/sho ; DHf n/a
*    S° 95haa/sho ; Cp 95haa/sho


NdO+
*     formula= NdO+
      charge=  1.0      ion size=  4.1 A      mole wt.=  160.2390 g
      3 species in reaction
      1.0000 Nd+++           1.0000 H2O           -2.0000 H+           
      19.5850    17.0637    14.2881    11.8579
      9.5574    7.7921    6.3667    5.1477
*    References DGf or LogK 95haa/sho ; DHf n/a
*    S° 95haa/sho ; Cp 95haa/sho


NdO2-
*     formula= NdO2-
      charge=  -1.0      ion size=  3.6 A      mole wt.=  176.2390 g
      3 species in reaction
      1.0000 Nd+++           2.0000 H2O           -4.0000 H+           
      41.6295    37.0595    32.0573    27.7206
      23.6915    20.7048    18.4332    16.6954
*    References DGf or LogK 95haa/sho ; DHf n/a
*    S° 95haa/sho ; Cp 95haa/sho


NdO2H(aq)
*     formula= NdO2H(aq)
      charge=  0.0      ion size=  3.4 A      mole wt.=  177.2470 g
      3 species in reaction
      1.0000 Nd+++           2.0000 H2O           -3.0000 H+           
      30.1699    26.3577    22.2744    18.8137
      15.6701    13.3783    11.6272    10.2043
*    References DGf or LogK 95haa/sho ; DHf n/a
*    S° 95haa/sho ; Cp 95haa/sho


NdOH++
*     formula= NdOH+2
      charge=  2.0      ion size=  5.7 A      mole wt.=  161.2470 g
      3 species in reaction
      1.0000 Nd+++           1.0000 H2O           -1.0000 H+           
      9.4617    8.1211    6.6032    5.2391
      3.9127    2.8662    2.0008    1.2508
*    References DGf or LogK 95haa/sho ; DHf n/a
*    S° 95haa/sho ; Cp 95haa/sho


NdSO4+
*     formula= NdSO4+
      charge=  1.0      ion size=  4.1 A      mole wt.=  240.3040 g
      2 species in reaction
      1.0000 Nd+++           1.0000 SO4--           
      -3.4453    -3.7227    -4.1292    -4.5940
      -5.2008    -5.8877    -6.7381    -7.9169
*    References DGf or LogK 95haa/sho ; DHf n/a
*    S° 95haa/sho ; Cp 95haa/sho


NF3(aq)
*     formula= NF3(0)
      charge=  0.0      ion size=  3.4 A      mole wt.=  71.0020 g
      4 species in reaction
      3.0000 F-           1.0000 NO2-           4.0000 H+
      -2.0000 H2O           
      65.2189    59.0348    51.4348    44.0129
      36.1236    29.2820    23.0479    16.9212
*    References DGf or LogK 01sch/sho ; DHf n/a
*    S° 01sch/sho ; Cp 01sch/sho


NH4+
*     formula= NH4(+)
      charge=  1.0      ion size=  2.5 A      mole wt.=  18.0380 g
      2 species in reaction
      1.0000 NH3(aq)           1.0000 H+           
      -10.0751    -9.2409    -8.2849    -7.3935
      -6.4826    -5.7266    -5.0765    -4.4934
*    References DGf or LogK 97asho/sas ; DHf n/a
*    S° 97asho/sas ; Cp 97asho/sas


Ni(CN)4--
*     formula= Ni(CN)4-2
      charge=  -2.0      ion size=  4.7 A      mole wt.=  162.7630 g
      2 species in reaction
      1.0000 Ni++           4.0000 CN-           
      -37.2033    -34.0832    -30.6795    -27.7282
      -25.0523    -23.2586    -22.2786    -22.2992
*    References DGf or LogK n/a ; DHf 05gam/bug
*    S° 05gam/bug ; Cp n/a


Ni(CN)5---
*     formula= Ni(CN)5-3
      charge=  -3.0      ion size=  6.7 A      mole wt.=  188.7800 g
      2 species in reaction
      1.0000 Ni++           5.0000 CN-           
      -36.6946    -33.3368    -29.6987    -26.5670
      -23.7617    -21.9330    -21.0284    -21.3074
*    References DGf or LogK n/a ; DHf 05gam/bug
*    S° 05gam/bug ; Cp n/a


NiAsO4-
*     formula= NiAsO4-
      charge=  -1.0      ion size=  3.6 A      mole wt.=  197.6130 g
      3 species in reaction
      1.0000 H2AsO4-           1.0000 Ni++           -2.0000 H+           
      12.0983    10.6651    9.1995    8.0389
      7.0779    6.4548    6.0289    5.7048
*    References DGf or LogK 07mar/acc ; DHf n/a
*    S° 07mar/acc ; Cp 07mar/acc


NiCl+
*     formula= NiCl(+)
      charge=  1.0      ion size=  4.1 A      mole wt.=  94.1460 g
      2 species in reaction
      1.0000 Cl-           1.0000 Ni++           
      -0.1119    -0.1508    -0.3046    -0.5567
      -0.9497    -1.4216    -1.9940    -2.7379
*    References DGf or LogK 05gam/bug ; DHf n/a
*    S° 97sve/sho ; Cp 97sve/sho


NiCO3
*     formula= NiCO3
      charge=  0.0      ion size=  3.4 A      mole wt.=  118.7020 g
      3 species in reaction
      1.0000 HCO3-           1.0000 Ni++           -1.0000 H+           
      6.0557    6.0557    6.0557    6.0557
      6.0557    6.0557    6.0557    6.0557
*    References DGf or LogK 05gam/bug ; DHf n/a
*    S° n/a ; Cp n/a


NiF+
*     formula= NiF(1)
      charge=  1.0      ion size=  4.1 A      mole wt.=  77.6920 g
      2 species in reaction
      1.0000 F-           1.0000 Ni++           
      -1.3250    -1.5010    -1.8170    -2.2162
      -2.7513    -3.3347    -4.0004    -4.8304
*    References DGf or LogK n/a ; DHf 05gam/bug
*    S° 05gam/bug ; Cp 97sve/sho


NiH2AsO4+
*     formula= NiH2AsO4+
      charge=  1.0      ion size=  4.1 A      mole wt.=  199.6280 g
      2 species in reaction
      1.0000 H2AsO4-           1.0000 Ni++           
      -1.8642    -1.6801    -1.5506    -1.5027
      -1.5461    -1.6904    -1.9514    -2.3908
*    References DGf or LogK 07mar/acc ; DHf n/a
*    S° 07mar/acc ; Cp 07mar/acc


NiHAsO4
*     formula= NiHAsO4
      charge=  0.0      ion size=  3.4 A      mole wt.=  198.6210 g
      3 species in reaction
      1.0000 H2AsO4-           1.0000 Ni++           -1.0000 H+           
      3.9868    3.7863    3.5550    3.3339
      3.0740    2.7841    2.4061    1.8442
*    References DGf or LogK 05gam/bug ; DHf n/a
*    S° 07mar/acc ; Cp 07mar/acc


NiHP2O7-
*     formula= NiHP2O7-
      charge=  -1.0      ion size=  3.6 A      mole wt.=  233.6450 g
      4 species in reaction
      1.0000 Ni++           2.0000 H2PO4-           -1.0000 H2O
      -1.0000 H+           
      3.1999    3.1999    3.1999    3.1999
      3.1999    3.1999    3.1999    3.1999
*    References DGf or LogK 05gam/bug ; DHf n/a
*    S° n/a ; Cp n/a


NiHPO4
*     formula= NiHPO4
      charge=  0.0      ion size=  3.4 A      mole wt.=  154.6730 g
      3 species in reaction
      1.0000 Ni++           1.0000 H2PO4-           -1.0000 H+           
      4.0913    4.0913    4.0913    4.0913
      4.0913    4.0913    4.0913    4.0913
*    References DGf or LogK 05gam/bug ; DHf n/a
*    S° n/a ; Cp n/a


NiHS+
*     formula= NiHS+
      charge=  1.0      ion size=  4.1 A      mole wt.=  91.7670 g
      2 species in reaction
      1.0000 Ni++           1.0000 HS-           
      -5.2509    -5.2509    -5.2509    -5.2509
      -5.2509    -5.2509    -5.2509    -5.2509
*    References DGf or LogK 05gam/bug ; DHf n/a
*    S° n/a ; Cp n/a


NiNO3+
*     formula= NiNO3+
      charge=  1.0      ion size=  4.1 A      mole wt.=  120.6980 g
      2 species in reaction
      1.0000 NO3-           1.0000 Ni++           
      -0.5508    -0.5508    -0.5508    -0.5508
      -0.5508    -0.5508    -0.5508    -0.5508
*    References DGf or LogK 05gam/bug ; DHf n/a
*    S° n/a ; Cp n/a


NiO(aq)
*     formula= NiO(0)
      charge=  0.0      ion size=  3.4 A      mole wt.=  74.6930 g
      3 species in reaction
      1.0000 Ni++           1.0000 H2O           -2.0000 H+           
      21.0829    19.5010    17.6794    16.0119
      14.3525    13.0056    11.8532    10.8058
*    References DGf or LogK 12bla ; DHf n/a
*    S° 12coo/oli ; Cp 97asho/sas


NiOH+
*     formula= NiOH(+)
      charge=  1.0      ion size=  4.1 A      mole wt.=  75.7010 g
      3 species in reaction
      1.0000 Ni++           1.0000 H2O           -1.0000 H+           
      10.0462    9.5010    8.8197    8.1543
      7.4524    6.8515    6.3145    5.8096
*    References DGf or LogK 98ply/zha ; DHf n/a
*    S° 12coo/oli ; Cp 97asho/sas


NiP2O7--
*     formula= NiP2O7-2
      charge=  -2.0      ion size=  4.7 A      mole wt.=  232.6370 g
      4 species in reaction
      1.0000 Ni++           2.0000 H2PO4-           -1.0000 H2O
      -2.0000 H+           
      9.1065    9.0082    8.8024    8.5212
      8.1007    7.5694    6.8478    5.7486
*    References DGf or LogK 05gam/bug ; DHf n/a
*    S° 82wag/eva ; Cp n/a


NiSO4
*     formula= NiSO4
      charge=  0.0      ion size=  3.4 A      mole wt.=  154.7570 g
      2 species in reaction
      1.0000 Ni++           1.0000 SO4--           
      -2.3294    -2.4198    -2.6890    -3.0886
      -3.6884    -4.4149    -5.3324    -6.5952
*    References DGf or LogK n/a ; DHf 05gam/bug
*    S° 05gam/bug ; Cp n/a


NO(aq)
*     formula= NO(0)
      charge=  0.0      ion size=  3.4 A      mole wt.=  30.0060 g
      4 species in reaction
      0.1667 N2(aq)           0.6667 NO2-           0.6667 H+
      -0.3333 H2O           
      8.0755    7.2609    6.1748    5.0374
      3.7505    2.5734    1.4569    0.3255
*    References DGf or LogK 01sch/sho ; DHf n/a
*    S° 01sch/sho ; Cp 01sch/sho


OCN-
*     formula= OCN-
      charge=  -1.0      ion size=  3.5 A      mole wt.=  42.0170 g
      2 species in reaction
      1.0000 CN-           0.5000 O2(aq)           
      -53.3476    -48.7135    -43.3344    -38.3649
      -33.4121    -29.4523    -26.2043    -23.4789
*    References DGf or LogK 97asho/sas ; DHf n/a
*    S° 97asho/sas ; Cp 97asho/sas


OH-
*     formula= OH(-)
      charge=  -1.0      ion size=  3.5 A      mole wt.=  17.0070 g
      2 species in reaction
      1.0000 H2O           -1.0000 H+           
      14.9448    14.0024    13.0340    12.2618
      11.6407    11.3001    11.1948    11.3463
*    References DGf or LogK n/a ; DHf 89cox/wag
*    S° 89cox/wag ; Cp 97asho/sas

P2O7----
*     formula= P2O7-4
      charge=  -4.0      ion size=  9.6 A      mole wt.=  173.9430 g
      3 species in reaction
      2.0000 H2PO4-           -1.0000 H2O           -2.0000 H+           
      18.4298    17.8097    17.3360    17.1409
      17.2500    17.6656    18.3810    19.4972
*    References DGf or LogK 92gre/fug ; DHf n/a
*    S° 82wag/eva ; Cp 97asho/sas


Pb(CO3)
*     formula= Pb(CO3)
      charge=  0.0      ion size=  3.4 A      mole wt.=  267.2090 g
      3 species in reaction
      1.0000 HCO3-           1.0000 Pb++           -1.0000 H+           
      3.4934    3.3270    3.0915    2.8394
      2.5319    2.1988    1.7895    1.2096
*    References DGf or LogK 06bla/pia ; DHf n/a
*    S° 06bla/pia ; Cp n/a


Pb(CO3)2--
*     formula= Pb(CO3)2(-2)
      charge=  -2.0      ion size=  4.7 A      mole wt.=  327.2180 g
      3 species in reaction
      2.0000 HCO3-           1.0000 Pb++           -2.0000 H+           
      10.5240    10.5240    10.5240    10.5240
      10.5240    10.5240    10.5240    10.5240
*    References DGf or LogK 06bla/pia ; DHf n/a
*    S° n/a ; Cp n/a


Pb(H2PO4)+
*     formula= PbH2PO4(+1)
      charge=  1.0      ion size=  4.1 A      mole wt.=  304.1870 g
      2 species in reaction
      1.0000 H2PO4-           1.0000 Pb++           
      -1.5000    -1.5000    -1.5000    -1.5000
      -1.5000    -1.5000    -1.5000    -1.5000
*    References DGf or LogK 72anri ; DHf n/a
*    S° n/a ; Cp n/a


Pb(HS)2(aq)
*     formula= Pb(HS)2(0)
      charge=  0.0      ion size=  3.4 A      mole wt.=  273.3480 g
      2 species in reaction
      1.0000 Pb++           2.0000 HS-           
      -16.1526    -15.0100    -13.9130    -13.1183
      -12.5977    -12.4795    -12.7343    -13.4597
*    References DGf or LogK 97sve/sho ; DHf n/a
*    S° 97sve/sho ; Cp 97sve/sho


Pb(HS)3-
*     formula= Pb(HS)3(-1)
      charge=  -1.0      ion size=  3.6 A      mole wt.=  306.4220 g
      2 species in reaction
      1.0000 Pb++           3.0000 HS-           
      -17.5579    -16.2600    -15.0562    -14.2279
      -13.7474    -13.7357    -14.1583    -15.1336
*    References DGf or LogK 97sve/sho ; DHf n/a
*    S° 97sve/sho ; Cp 97sve/sho


Pb(OH)4--
*     formula= Pb(OH)4-2
      charge=  -2.0      ion size=  4.7 A      mole wt.=  275.2290 g
      3 species in reaction
      1.0000 Pb++           4.0000 H2O           -4.0000 H+           
      42.1790    38.9041    35.4381    32.6192
      30.2454    28.7136    27.7262    27.0815
*    References DGf or LogK 01per/hef ; DHf n/a
*    S° 97cro ; Cp n/a


Pb(SO4)2--
*     formula= Pb(SO4)2(-2)
      charge=  -2.0      ion size=  4.7 A      mole wt.=  399.3270 g
      2 species in reaction
      1.0000 Pb++           2.0000 SO4--           
      -3.4700    -3.4700    -3.4700    -3.4700
      -3.4700    -3.4700    -3.4700    -3.4700
*    References DGf or LogK 06bla/pia ; DHf n/a
*    S° n/a ; Cp n/a


Pb2(OH)+++
*     formula= Pb2(OH)+3
      charge=  3.0      ion size=  8.2 A      mole wt.=  431.4070 g
      3 species in reaction
      2.0000 Pb++           1.0000 H2O           -1.0000 H+           
      7.1800    7.1800    7.1800    7.1800
      7.1800    7.1800    7.1800    7.1800
*    References DGf or LogK 99lot/och ; DHf n/a
*    S° n/a ; Cp n/a


Pb4(OH)4++++
*     formula= Pb4(OH)4+4
      charge=  4.0      ion size=  11.6 A      mole wt.=  896.8290 g
      3 species in reaction
      4.0000 Pb++           4.0000 H2O           -4.0000 H+           
      21.9612    20.6341    19.1664    17.9263
      16.8021    15.9438    15.1797    14.3449
*    References DGf or LogK 99lot/och ; DHf n/a
*    S° 82wag/eva ; Cp n/a


Pb6(OH)8++++
*     formula= Pb6(OH)8+4
      charge=  4.0      ion size=  11.6 A      mole wt.=  1379.2590 g
      3 species in reaction
      6.0000 Pb++           8.0000 H2O           -8.0000 H+           
      45.8182    42.6881    39.2614    36.3772
      33.7938    31.8971    30.3372    28.8084
*    References DGf or LogK 99lot/och ; DHf n/a
*    S° 82wag/eva ; Cp n/a


PbAsO4-
*     formula= PbAsO4-
      charge=  -1.0      ion size=  3.6 A      mole wt.=  346.1190 g
      3 species in reaction
      1.0000 H2AsO4-           1.0000 Pb++           -2.0000 H+           
      13.3215    11.7353    10.0670    8.6886
      7.4712    6.6026    5.9306    5.3332
*    References DGf or LogK 07mar/acc ; DHf n/a
*    S° 07mar/acc ; Cp 07mar/acc


PbCl+
*     formula= PbCl(+)
      charge=  1.0      ion size=  4.1 A      mole wt.=  242.6520 g
      2 species in reaction
      1.0000 Cl-           1.0000 Pb++           
      -1.4133    -1.4400    -1.5741    -1.8050
      -2.1770    -2.6369    -3.2097    -3.9731
*    References DGf or LogK 97sve/sho ; DHf n/a
*    S° 97sve/sho ; Cp 97sve/sho


PbCl2(aq)
*     formula= PbCl2(0)
      charge=  0.0      ion size=  3.4 A      mole wt.=  278.1050 g
      2 species in reaction
      2.0000 Cl-           1.0000 Pb++           
      -1.9387    -2.0000    -2.2318    -2.6145
      -3.2230    -3.9744    -4.9181    -6.2018
*    References DGf or LogK 97sve/sho ; DHf n/a
*    S° 97sve/sho ; Cp 97sve/sho


PbCl3-
*     formula= PbCl3(-)
      charge=  -1.0      ion size=  3.6 A      mole wt.=  313.5570 g
      2 species in reaction
      3.0000 Cl-           1.0000 Pb++           
      -1.6450    -1.6900    -1.9375    -2.3703
      -3.0742    -3.9519    -5.0567    -6.5554
*    References DGf or LogK 97sve/sho ; DHf n/a
*    S° 97sve/sho ; Cp 97sve/sho


PbCl4--
*     formula= PbCl4(-2)
      charge=  -2.0      ion size=  4.7 A      mole wt.=  349.0100 g
      2 species in reaction
      4.0000 Cl-           1.0000 Pb++           
      -1.4649    -1.4000    -1.5354    -1.8793
      -2.5087    -3.3369    -4.4045    -5.8631
*    References DGf or LogK 97sve/sho ; DHf n/a
*    S° 97sve/sho ; Cp 97sve/sho


PbF+
*     formula= PbF(1)
      charge=  1.0      ion size=  4.1 A      mole wt.=  226.1980 g
      2 species in reaction
      1.0000 F-           1.0000 Pb++           
      -2.3817    -2.2700    -2.2521    -2.3438
      -2.5751    -2.9190    -3.3923    -4.0635
*    References DGf or LogK 97sve/sho ; DHf n/a
*    S° 97sve/sho ; Cp 97sve/sho


PbF2(aq)
*     formula= PbF2(0)
      charge=  0.0      ion size=  3.4 A      mole wt.=  245.1970 g
      2 species in reaction
      2.0000 F-           1.0000 Pb++           
      -3.2319    -3.0100    -2.9431    -3.0678
      -3.4384    -4.0226    -4.8581    -6.0853
*    References DGf or LogK 97sve/sho ; DHf n/a
*    S° 97sve/sho ; Cp 97sve/sho


PbH2AsO3+
*     formula= PbH2AsO3+
      charge=  1.0      ion size=  4.1 A      mole wt.=  332.1360 g
      2 species in reaction
      1.0000 H2AsO3-           1.0000 Pb++           
      -5.4916    -5.1721    -4.7894    -4.4290
      -4.0851    -3.8597    -3.7732    -3.8888
*    References DGf or LogK 07mar/acc ; DHf n/a
*    S° 07mar/acc ; Cp 07mar/acc


PbH2AsO4+
*     formula= PbH2AsO4+
      charge=  1.0      ion size=  4.1 A      mole wt.=  348.1350 g
      2 species in reaction
      1.0000 H2AsO4-           1.0000 Pb++           
      -1.4765    -1.5343    -1.7118    -1.9812
      -2.3853    -2.8640    -3.4477    -4.2210
*    References DGf or LogK 07mar/acc ; DHf n/a
*    S° 07mar/acc ; Cp 07mar/acc


PbH2PO4+
*     formula= PbH2PO4+
      charge=  1.0      ion size=  4.1 A      mole wt.=  304.1870 g
      2 species in reaction
      1.0000 H2PO4-           1.0000 Pb++           
      1.5000    1.5000    1.5000    1.5000
      1.5000    1.5000    1.5000    1.5000
*    References DGf or LogK 74nri ; DHf n/a
*    S° n/a ; Cp n/a


PbHAsO4
*     formula= PbHAsO4
      charge=  0.0      ion size=  3.4 A      mole wt.=  347.1270 g
      3 species in reaction
      1.0000 H2AsO4-           1.0000 Pb++           -1.0000 H+           
      4.3421    4.1663    3.9625    3.7687
      3.5432    3.2931    2.9641    2.4600
*    References DGf or LogK 07mar/acc ; DHf n/a
*    S° 07mar/acc ; Cp 07mar/acc


PbHCO3+
*     formula= PbHCO3(+1)
      charge=  1.0      ion size=  4.1 A      mole wt.=  268.2170 g
      2 species in reaction
      1.0000 HCO3-           1.0000 Pb++           
      -3.4430    -3.4430    -3.4430    -3.4430
      -3.4430    -3.4430    -3.4430    -3.4430
*    References DGf or LogK 89mar/smi ; DHf n/a
*    S° n/a ; Cp n/a


PbHPO4(aq)
*     formula= PbHPO4(0)
      charge=  0.0      ion size=  3.4 A      mole wt.=  303.1790 g
      3 species in reaction
      1.0000 H2PO4-           1.0000 Pb++           -1.0000 H+           
      4.1050    4.1050    4.1050    4.1050
      4.1050    4.1050    4.1050    4.1050
*    References DGf or LogK 72anri, 76smi/mar ; DHf n/a
*    S° n/a ; Cp n/a


PbO(aq)
*     formula= PbO(0)
      charge=  0.0      ion size=  3.4 A      mole wt.=  223.1990 g
      3 species in reaction
      1.0000 Pb++           1.0000 H2O           -2.0000 H+           
      18.5656    16.9510    15.2083    13.7192
      12.3520    11.3397    10.5479    9.8770
*    References DGf or LogK 97asho/sas ; DHf n/a
*    S° 97asho/sas ; Cp 97asho/sas


PbOH+
*     formula= PbOH(+)
      charge=  1.0      ion size=  4.1 A      mole wt.=  224.2070 g
      3 species in reaction
      1.0000 Pb++           1.0000 H2O           -1.0000 H+           
      7.5988    7.5110    7.4689    7.4910
      7.5776    7.6966    7.8247    7.9409
*    References DGf or LogK 97asho/sas ; DHf n/a
*    S° 97asho/sas ; Cp 97asho/sas


PbP2O7--
*     formula= PbP2O7-2
      charge=  -2.0      ion size=  4.7 A      mole wt.=  381.1430 g
      4 species in reaction
      2.0000 H2PO4-           1.0000 Pb++           -1.0000 H2O
      -2.0000 H+           
      9.4782    9.4782    9.4782    9.4782
      9.4782    9.4782    9.4782    9.4782
*    References DGf or LogK 82wag/eva ; DHf n/a
*    S° n/a ; Cp n/a


PbSO4
*     formula= PbSO4
      charge=  0.0      ion size=  3.4 A      mole wt.=  303.2640 g
      2 species in reaction
      1.0000 Pb++           1.0000 SO4--           
      -2.7839    -2.8200    -3.0299    -3.3754
      -3.9171    -4.5876    -5.4458    -6.6455
*    References DGf or LogK 06bla/pia ; DHf n/a
*    S° 06bla/pia ; Cp n/a


Pd(SO4)2--
*     formula= Pd(SO4)2(-2)
      charge=  -2.0      ion size=  4.7 A      mole wt.=  298.5470 g
      2 species in reaction
      1.0000 Pd++           2.0000 SO4--           
      -4.4253    -4.5426    -4.8962    -5.4167
      -6.1810    -7.0777    -8.1694    -9.6110
*    References DGf or LogK 98sas/sho ; DHf n/a
*    S° 98sas/sho ; Cp 98sas/sho


Pd(SO4)3----
*     formula= Pd(SO4)3-4
      charge=  -4.0      ion size=  9.6 A      mole wt.=  394.6110 g
      2 species in reaction
      1.0000 Pd++           3.0000 SO4--           
      -6.1127    -6.3302    -6.9136    -7.7334
      -8.8772    -10.1427    -11.5886    -13.3710
*    References DGf or LogK 98sas/sho ; DHf n/a
*    S° 98sas/sho ; Cp 98sas/sho


PdCl+
*     formula= PdCl+
      charge=  1.0      ion size=  4.1 A      mole wt.=  141.8720 g
      2 species in reaction
      1.0000 Cl-           1.0000 Pd++           
      -6.6493    -6.1118    -5.6193    -5.2966
      -5.1429    -5.2030    -5.4611    -5.9615
*    References DGf or LogK 98sas/sho ; DHf n/a
*    S° 98sas/sho ; Cp 98sas/sho


PdCl2(aq)
*     formula= PdCl2(aq)
      charge=  0.0      ion size=  3.4 A      mole wt.=  177.3250 g
      2 species in reaction
      2.0000 Cl-           1.0000 Pd++           
      -11.8391    -10.7283    -9.6800    -8.9549
      -8.5425    -8.5535    -8.9564    -9.8442
*    References DGf or LogK 98sas/sho ; DHf n/a
*    S° 98sas/sho ; Cp 98sas/sho


PdCl3-
*     formula= PdCl3-
      charge=  -1.0      ion size=  3.6 A      mole wt.=  212.7770 g
      2 species in reaction
      3.0000 Cl-           1.0000 Pd++           
      -14.8100    -13.1384    -11.5298    -10.3674
      -9.5989    -9.3877    -9.6518    -10.4511
*    References DGf or LogK 98sas/sho ; DHf n/a
*    S° 98sas/sho ; Cp 98sas/sho


PdCl4--
*     formula= PdCl4-2
      charge=  -2.0      ion size=  4.7 A      mole wt.=  248.2300 g
      2 species in reaction
      4.0000 Cl-           1.0000 Pd++           
      -17.5734    -15.1381    -12.7137    -10.8593
      -9.4597    -8.7861    -8.6960    -9.2111
*    References DGf or LogK 98sas/sho ; DHf n/a
*    S° 98sas/sho ; Cp 98sas/sho


PdO(aq)
*     formula= PdO(aq)
      charge=  0.0      ion size=  3.4 A      mole wt.=  122.4190 g
      3 species in reaction
      1.0000 Pd++           1.0000 H2O           -2.0000 H+           
      2.2982    2.1838    2.0945    2.0509
      2.0325    2.0145    1.9631    1.8456
*    References DGf or LogK 98sas/sho ; DHf n/a
*    S° 98sas/sho ; Cp 98sas/sho


PdOH+
*     formula= Pd(OH)+
      charge=  1.0      ion size=  4.1 A      mole wt.=  123.4270 g
      3 species in reaction
      1.0000 Pd++           1.0000 H2O           -1.0000 H+           
      1.0979    0.9890    0.8646    0.7560
      0.6485    0.5506    0.4430    0.3094
*    References DGf or LogK 98sas/sho ; DHf n/a
*    S° 98sas/sho ; Cp 98sas/sho


PdSO4(aq)
*     formula= Pd(SO4)(aq)
      charge=  0.0      ion size=  3.4 A      mole wt.=  202.4840 g
      2 species in reaction
      1.0000 Pd++           1.0000 SO4--           
      -2.4324    -2.4766    -2.6324    -2.8842
      -3.2995    -3.8524    -4.6107    -5.7307
*    References DGf or LogK 98sas/sho ; DHf n/a
*    S° 98sas/sho ; Cp 98sas/sho


PO3F--
*     formula= PO3F-2
      charge=  -2.0      ion size=  4.7 A      mole wt.=  97.9700 g
      3 species in reaction
      1.0000 F-           1.0000 H2PO4-           -1.0000 H2O           
      1.1800    1.1800    1.1800    1.1800
      1.1800    1.1800    1.1800    1.1800
*    References DGf or LogK 82wag/eva ; DHf n/a
*    S° n/a ; Cp n/a


PO4---
*     formula= PO4(-3)
      charge=  -3.0      ion size=  4.0 A      mole wt.=  94.9710 g
      2 species in reaction
      1.0000 H2PO4-           -2.0000 H+           
      19.9612    19.5600    19.3616    19.4415
      19.8450    20.5119    21.4415    22.7330
*    References DGf or LogK 89cox/wag ; DHf 89cox/wag
*    S° n/a ; Cp 97asho/sas

*PO4---
*     charge= -3      ion size=  4.0 A      mole wt.=   94.9714 g
*     2 species in reaction
*       -2.000 H+              1.000 H2PO4-  
*        19.9221     19.5339     19.3329     19.3899
*        19.7462     20.3532     21.2140     22.4258
**
**    gflag = 1 [reported delG0f used]
**    extrapolation algorithm: supcrt92 [92joh/oel]
**    reference-state data source = 88sho/hel
**         delG0f =   -243.500 kcal/mol
**         delH0f =   -305.300 kcal/mol
**         S0PrTr =    -53.000 cal/(mol*K)
**   from thermo.com.R8.V6+ by adding H2PO4- HPO4--

PrCl++
*     formula= PrCl+2
      charge=  2.0      ion size=  5.7 A      mole wt.=  176.3600 g
      2 species in reaction
      1.0000 Cl-           1.0000 Pr+++           
      -0.1404    -0.3211    -0.6572    -1.0948
      -1.6931    -2.3493    -3.0917    -3.9937
*    References DGf or LogK 95haa/sho ; DHf n/a
*    S° 95haa/sho ; Cp 95haa/sho


PrCl2+
*     formula= PrCl2+
      charge=  1.0      ion size=  4.1 A      mole wt.=  211.8120 g
      2 species in reaction
      2.0000 Cl-           1.0000 Pr+++           
      0.1993    -0.0558    -0.5123    -1.1057
      -1.9350    -2.8804    -4.0052    -5.4599
*    References DGf or LogK 95haa/sho ; DHf n/a
*    S° 95haa/sho ; Cp 95haa/sho


PrCl3(aq)
*     formula= PrCl3(aq)
      charge=  0.0      ion size=  3.4 A      mole wt.=  247.2650 g
      2 species in reaction
      3.0000 Cl-           1.0000 Pr+++           
      0.4690    0.2828    -0.0357    -0.4650
      -1.1224    -1.9652    -3.0971    -4.7492
*    References DGf or LogK 95haa/sho ; DHf n/a
*    S° 95haa/sho ; Cp 95haa/sho


PrCl4-
*     formula= PrCl4-
      charge=  -1.0      ion size=  3.6 A      mole wt.=  282.7170 g
      2 species in reaction
      4.0000 Cl-           1.0000 Pr+++           
      0.6515    0.6947    0.7880    0.8679
      0.8527    0.6376    0.1148    -0.9442
*    References DGf or LogK 95haa/sho ; DHf n/a
*    S° 95haa/sho ; Cp 95haa/sho


PrCO3+
*     formula= PrCO3+
      charge=  1.0      ion size=  4.1 A      mole wt.=  200.9170 g
      3 species in reaction
      1.0000 HCO3-           1.0000 Pr+++           -1.0000 H+           
      2.7212    2.7556    2.8418    2.9556
      3.0763    3.1332    3.0754    2.8047
*    References DGf or LogK 95haa/sho ; DHf n/a
*    S° 95haa/sho ; Cp 95haa/sho


PrF++
*     formula= PrF+2
      charge=  2.0      ion size=  5.7 A      mole wt.=  159.9060 g
      2 species in reaction
      1.0000 F-           1.0000 Pr+++           
      -3.9418    -4.2619    -4.7616    -5.3483
      -6.0948    -6.8746    -7.7298    -8.7414
*    References DGf or LogK 95haa/sho ; DHf n/a
*    S° 95haa/sho ; Cp 95haa/sho


PrF2+
*     formula= PrF2+
      charge=  1.0      ion size=  4.1 A      mole wt.=  178.9040 g
      2 species in reaction
      2.0000 F-           1.0000 Pr+++           
      -7.2595    -7.4243    -7.7885    -8.2989
      -9.0477    -9.9369    -11.0321    -12.4858
*    References DGf or LogK 95haa/sho ; DHf n/a
*    S° 95haa/sho ; Cp 95haa/sho


PrF3(aq)
*     formula= PrF3(aq)
      charge=  0.0      ion size=  3.4 A      mole wt.=  197.9030 g
      2 species in reaction
      3.0000 F-           1.0000 Pr+++           
      -9.9403    -9.7804    -9.7240    -9.8180
      -10.1539    -10.7611    -11.7333    -13.2951
*    References DGf or LogK 95haa/sho ; DHf n/a
*    S° 95haa/sho ; Cp 95haa/sho


PrF4-
*     formula= PrF4-
      charge=  -1.0      ion size=  3.6 A      mole wt.=  216.9010 g
      2 species in reaction
      4.0000 F-           1.0000 Pr+++           
      -12.4529    -11.6967    -10.8234    -10.0439
      -9.3770    -9.0646    -9.1848    -9.9603
*    References DGf or LogK 95haa/sho ; DHf n/a
*    S° 95haa/sho ; Cp 95haa/sho


PrH2PO4++
*     formula= PrH2PO4+2
      charge=  2.0      ion size=  5.7 A      mole wt.=  237.8950 g
      2 species in reaction
      1.0000 H2PO4-           1.0000 Pr+++           
      -1.3540    -1.1831    -1.1603    -1.2990
      -1.6241    -2.0759    -2.6560    -3.4204
*    References DGf or LogK 95haa/sho ; DHf n/a
*    S° 95haa/sho ; Cp 95haa/sho


PrHCO3++
*     formula= PrHCO3+2
      charge=  2.0      ion size=  5.7 A      mole wt.=  201.9240 g
      2 species in reaction
      1.0000 HCO3-           1.0000 Pr+++           
      -2.2224    -1.9356    -1.7769    -1.7888
      -1.9856    -2.3326    -2.8242    -3.5115
*    References DGf or LogK 95haa/sho ; DHf n/a
*    S° 95haa/sho ; Cp 95haa/sho


PrNO3++
*     formula= PrNO3+2
      charge=  2.0      ion size=  5.7 A      mole wt.=  202.9130 g
      2 species in reaction
      1.0000 NO3-           1.0000 Pr+++           
      -1.1639    -0.6546    -0.2247    0.0280
      0.1132    0.0113    -0.2583    -0.7349
*    References DGf or LogK 95haa/sho ; DHf n/a
*    S° 95haa/sho ; Cp 95haa/sho


PrO+
*     formula= PrO+
      charge=  1.0      ion size=  4.1 A      mole wt.=  156.9070 g
      3 species in reaction
      1.0000 Pr+++           1.0000 H2O           -2.0000 H+           
      19.8230    17.2836    14.4917    12.0502
      9.7413    7.9705    6.5405    5.3177
*    References DGf or LogK 95haa/sho ; DHf n/a
*    S° 95haa/sho ; Cp 95haa/sho


PrO2-
*     formula= PrO2-
      charge=  -1.0      ion size=  3.6 A      mole wt.=  172.9060 g
      3 species in reaction
      1.0000 Pr+++           2.0000 H2O           -4.0000 H+           
      42.1846    37.5726    32.5246    28.1477
      24.0799    21.0625    18.7650    17.0054
*    References DGf or LogK 95haa/sho ; DHf n/a
*    S° 95haa/sho ; Cp 95haa/sho


PrO2H(aq)
*     formula= PrO2H(aq)
      charge=  0.0      ion size=  3.4 A      mole wt.=  173.9140 g
      3 species in reaction
      1.0000 Pr+++           2.0000 H2O           -3.0000 H+           
      30.4076    26.5776    22.4832    19.0218
      15.8875    13.6105    11.8761    10.4709
*    References DGf or LogK 95haa/sho ; DHf n/a
*    S° 95haa/sho ; Cp 95haa/sho


PrOH++
*     formula= PrOH+2
      charge=  2.0      ion size=  5.7 A      mole wt.=  157.9150 g
      3 species in reaction
      1.0000 Pr+++           1.0000 H2O           -1.0000 H+           
      9.6196    8.2677    6.7412    5.3729
      4.0451    2.9987    2.1335    1.3836
*    References DGf or LogK 95haa/sho ; DHf n/a
*    S° 95haa/sho ; Cp 95haa/sho


PrSO4+
*     formula= PrSO4+
      charge=  1.0      ion size=  4.1 A      mole wt.=  236.9710 g
      2 species in reaction
      1.0000 Pr+++           1.0000 SO4--           
      4.5496    3.6073    2.4375    1.2751
      -0.0206    -1.2544    -2.5520    -4.1051
*    References DGf or LogK 95haa/sho ; DHf n/a
*    S° 95haa/sho ; Cp 95haa/sho


Pt(SO4)2--
*     formula= Pt(SO4)2-2
      charge=  -2.0      ion size=  4.7 A      mole wt.=  387.2070 g
      2 species in reaction
      1.0000 Pt++           2.0000 SO4--           
      -4.7753    -4.8578    -5.1714    -5.6552
      -6.3833    -7.2513    -8.3192    -9.7395
*    References DGf or LogK 98sas/sho ; DHf n/a
*    S° 98sas/sho ; Cp 98sas/sho


Pt(SO4)3----
*     formula= Pt(SO4)3-4
      charge=  -4.0      ion size=  9.6 A      mole wt.=  483.2710 g
      2 species in reaction
      1.0000 Pt++           3.0000 SO4--           
      -6.0281    -6.2422    -6.8204    -7.6341
      -8.7706    -10.0291    -11.4678    -13.2420
*    References DGf or LogK 98sas/sho ; DHf n/a
*    S° 98sas/sho ; Cp 98sas/sho


PtCl+
*     formula= PtCl+
      charge=  1.0      ion size=  4.1 A      mole wt.=  230.5320 g
      2 species in reaction
      1.0000 Cl-           1.0000 Pt++           
      -9.4760    -8.6920    -7.9128    -7.3250
      -6.9071    -6.7561    -6.8411    -7.1964
*    References DGf or LogK 98sas/sho ; DHf n/a
*    S° 98sas/sho ; Cp 98sas/sho


PtCl2(aq)
*     formula= PtCl2(aq)
      charge=  0.0      ion size=  3.4 A      mole wt.=  265.9850 g
      2 species in reaction
      2.0000 Cl-           1.0000 Pt++           
      -17.0913    -15.5148    -13.9217    -12.6905
      -11.7715    -11.3765    -11.4467    -12.0564
*    References DGf or LogK 98sas/sho ; DHf n/a
*    S° 98sas/sho ; Cp 98sas/sho


PtCl3-
*     formula= PtCl3-
      charge=  -1.0      ion size=  3.6 A      mole wt.=  301.4370 g
      2 species in reaction
      3.0000 Cl-           1.0000 Pt++           
      -20.7446    -18.5260    -16.2705    -14.5001
      -13.1150    -12.4015    -12.2459    -12.6865
*    References DGf or LogK 98sas/sho ; DHf n/a
*    S° 98sas/sho ; Cp 98sas/sho


PtCl4--
*     formula= PtCl4-2
      charge=  -2.0      ion size=  4.7 A      mole wt.=  336.8900 g
      2 species in reaction
      4.0000 Cl-           1.0000 Pt++           
      -23.0410    -20.0565    -16.9712    -14.4854
      -12.4348    -11.2219    -10.6742    -10.7931
*    References DGf or LogK 98sas/sho ; DHf n/a
*    S° 98sas/sho ; Cp 98sas/sho


PtO(aq)
*     formula= PtO(aq)
      charge=  0.0      ion size=  3.4 A      mole wt.=  211.0790 g
      3 species in reaction
      1.0000 Pt++           1.0000 H2O           -2.0000 H+           
      -4.9518    -4.4352    -3.8124    -3.2168
      -2.6182    -2.1602    -1.8353    -1.6493
*    References DGf or LogK 98sas/sho ; DHf n/a
*    S° 98sas/sho ; Cp 98sas/sho


PtOH+
*     formula= Pt(OH)+
      charge=  1.0      ion size=  4.1 A      mole wt.=  212.0870 g
      3 species in reaction
      1.0000 Pt++           1.0000 H2O           -1.0000 H+           
      -2.6915    -2.4634    -2.2128    -1.9893
      -1.7808    -1.6381    -1.5576    -1.5405
*    References DGf or LogK 98sas/sho ; DHf n/a
*    S° 98sas/sho ; Cp 98sas/sho


PtSO4(aq)
*     formula= Pt(SO4)(aq)
      charge=  0.0      ion size=  3.4 A      mole wt.=  291.1440 g
      2 species in reaction
      1.0000 Pt++           1.0000 SO4--           
      -2.9964    -2.9897    -3.0870    -3.2856
      -3.6493    -4.1627    -4.8906    -5.9867
*    References DGf or LogK 98sas/sho ; DHf n/a
*    S° 98sas/sho ; Cp 98sas/sho


RbBr(aq)
*     formula= RbBr(0)
      charge=  0.0      ion size=  3.4 A      mole wt.=  165.3720 g
      2 species in reaction
      1.0000 Br-           1.0000 Rb+           
      1.4280    1.2168    0.9445    0.6612
      0.3273    -0.0125    -0.3974    -0.9051
*    References DGf or LogK 97sve/sho ; DHf n/a
*    S° 97sve/sho ; Cp 97sve/sho


RbCl(aq)
*     formula= RbCl(0)
      charge=  0.0      ion size=  3.4 A      mole wt.=  120.9200 g
      2 species in reaction
      1.0000 Cl-           1.0000 Rb+           
      1.1486    0.9470    0.6900    0.4216
      0.1005    -0.2326    -0.6168    -1.1299
*    References DGf or LogK 97sve/sho ; DHf n/a
*    S° 97sve/sho ; Cp 97sve/sho


RbF(aq)
*     formula= RbF(0)
      charge=  0.0      ion size=  3.4 A      mole wt.=  104.4660 g
      2 species in reaction
      1.0000 F-           1.0000 Rb+           
      -0.9819    -1.0000    -1.0500    -1.1282
      -1.2614    -1.4489    -1.7228    -2.1559
*    References DGf or LogK 97sve/sho ; DHf n/a
*    S° 97sve/sho ; Cp 97sve/sho


RbI(aq)
*     formula= RbI(0)
      charge=  0.0      ion size=  3.4 A      mole wt.=  212.3720 g
      2 species in reaction
      1.0000 I-           1.0000 Rb+           
      1.0767    0.9602    0.7966    0.6090
      0.3644    0.0920    -0.2386    -0.6974
*    References DGf or LogK 97sve/sho ; DHf n/a
*    S° 97sve/sho ; Cp 97sve/sho


RbOH(aq)
*     formula= RbOH(0)
      charge=  0.0      ion size=  3.4 A      mole wt.=  102.4750 g
      3 species in reaction
      1.0000 Rb+           1.0000 H2O           -1.0000 H+           
      15.2746    14.2050    13.0751    12.1401
      11.3242    10.7671    10.3805    10.1039
*    References DGf or LogK 97asho/sas ; DHf n/a
*    S° 97asho/sas ; Cp 97asho/sas


Rh(SO4)2-
*     formula= Rh(SO4)2-
      charge=  -1.0      ion size=  3.6 A      mole wt.=  295.0330 g
      2 species in reaction
      1.0000 Rh+++           2.0000 SO4--           
      -1.1355    -2.1311    -3.4882    -4.9364
      -6.6575    -8.3902    -10.2877    -12.6117
*    References DGf or LogK 98sas/sho ; DHf n/a
*    S° 98sas/sho ; Cp 98sas/sho


Rh(SO4)2--
*     formula= Rh(SO4)2-2
      charge=  -2.0      ion size=  4.7 A      mole wt.=  295.0330 g
      2 species in reaction
      1.0000 Rh++           2.0000 SO4--           
      -4.4136    -4.5133    -4.8470    -5.3484
      -6.0897    -6.9615    -8.0234    -9.4287
*    References DGf or LogK 98sas/sho ; DHf n/a
*    S° 98sas/sho ; Cp 98sas/sho


Rh(SO4)3---
*     formula= Rh(SO4)3-3
      charge=  -3.0      ion size=  6.7 A      mole wt.=  391.0960 g
      2 species in reaction
      1.0000 Rh+++           3.0000 SO4--           
      -0.3676    -1.9688    -4.1342    -6.4101
      -9.0357    -11.5607    -14.1697    -17.1499
*    References DGf or LogK 98sas/sho ; DHf n/a
*    S° 98sas/sho ; Cp 98sas/sho


Rh(SO4)3----
*     formula= Rh(SO4)3-4
      charge=  -4.0      ion size=  9.6 A      mole wt.=  391.0960 g
      2 species in reaction
      1.0000 Rh++           3.0000 SO4--           
      -5.9044    -6.1103    -6.6794    -7.4838
      -8.6074    -9.8490    -11.2652    -13.0111
*    References DGf or LogK 98sas/sho ; DHf n/a
*    S° 98sas/sho ; Cp 98sas/sho


RhCl+
*     formula= RhCl+
      charge=  1.0      ion size=  4.1 A      mole wt.=  138.3580 g
      2 species in reaction
      1.0000 Cl-           1.0000 Rh++           
      0.2157    0.2067    0.0820    -0.1484
      -0.5256    -0.9903    -1.5613    -2.3077
*    References DGf or LogK 98sas/sho ; DHf n/a
*    S° 98sas/sho ; Cp 98sas/sho


RhCl++
*     formula= RhCl+2
      charge=  2.0      ion size=  5.7 A      mole wt.=  138.3580 g
      2 species in reaction
      1.0000 Cl-           1.0000 Rh+++           
      -2.0933    -2.0217    -2.0978    -2.3240
      -2.7404    -3.2739    -3.9321    -4.7760
*    References DGf or LogK 98sas/sho ; DHf n/a
*    S° 98sas/sho ; Cp 98sas/sho


RhCl2+
*     formula= RhCl2+
      charge=  1.0      ion size=  4.1 A      mole wt.=  173.8100 g
      2 species in reaction
      2.0000 Cl-           1.0000 Rh+++           
      -3.5937    -3.3030    -3.2135    -3.3792
      -3.8587    -4.5851    -5.5758    -6.9574
*    References DGf or LogK 98sas/sho ; DHf n/a
*    S° 98sas/sho ; Cp 98sas/sho


RhCl2(aq)
*     formula= RhCl2(aq)
      charge=  0.0      ion size=  3.4 A      mole wt.=  173.8100 g
      2 species in reaction
      2.0000 Cl-           1.0000 Rh++           
      0.6365    0.7725    0.7305    0.4860
      -0.0278    -0.7450    -1.6992    -3.0258
*    References DGf or LogK 98sas/sho ; DHf n/a
*    S° 98sas/sho ; Cp 98sas/sho


RhCl3(aq)
*     formula= RhCl3(aq)
      charge=  0.0      ion size=  3.4 A      mole wt.=  209.2630 g
      2 species in reaction
      3.0000 Cl-           1.0000 Rh+++           
      -3.9619    -3.3382    -2.8783    -2.7337
      -2.9722    -3.6102    -4.6788    -6.3603
*    References DGf or LogK 98sas/sho ; DHf n/a
*    S° 98sas/sho ; Cp 98sas/sho


RhCl3-
*     formula= RhCl3-
      charge=  -1.0      ion size=  3.6 A      mole wt.=  209.2630 g
      2 species in reaction
      3.0000 Cl-           1.0000 Rh++           
      1.6627    2.0933    2.3315    2.2926
      1.9346    1.3085    0.4122    -0.8703
*    References DGf or LogK 98sas/sho ; DHf n/a
*    S° 98sas/sho ; Cp 98sas/sho


RhCl4-
*     formula= RhCl4-
      charge=  -1.0      ion size=  3.6 A      mole wt.=  244.7150 g
      2 species in reaction
      4.0000 Cl-           1.0000 Rh+++           
      -4.5444    -3.3001    -2.0738    -1.1747
      -0.5997    -0.5214    -0.9382    -2.0298
*    References DGf or LogK 98sas/sho ; DHf n/a
*    S° 98sas/sho ; Cp 98sas/sho


RhCl4--
*     formula= RhCl4-2
      charge=  -2.0      ion size=  4.7 A      mole wt.=  244.7150 g
      2 species in reaction
      4.0000 Cl-           1.0000 Rh++           
      2.2737    3.2969    4.1873    4.7213
      4.9098    4.7079    4.1582    3.1720
*    References DGf or LogK 98sas/sho ; DHf n/a
*    S° 98sas/sho ; Cp 98sas/sho


RhO+
*     formula= RhO+
      charge=  1.0      ion size=  4.1 A      mole wt.=  118.9050 g
      3 species in reaction
      1.0000 Rh+++           1.0000 H2O           -2.0000 H+           
      6.6471    5.4017    4.0381    2.8509
      1.7265    0.8510    0.1188    -0.5427
*    References DGf or LogK 98sas/sho ; DHf n/a
*    S° 98sas/sho ; Cp 98sas/sho


RhO(aq)
*     formula= RhO(aq)
      charge=  0.0      ion size=  3.4 A      mole wt.=  118.9050 g
      3 species in reaction
      1.0000 Rh++           1.0000 H2O           -2.0000 H+           
      17.2510    15.9496    14.4631    13.1132
      11.7792    10.6998    9.7726    8.9184
*    References DGf or LogK 98sas/sho ; DHf n/a
*    S° 98sas/sho ; Cp 98sas/sho


RhOH+
*     formula= Rh(OH)+
      charge=  1.0      ion size=  4.1 A      mole wt.=  119.9130 g
      3 species in reaction
      1.0000 Rh++           1.0000 H2O           -1.0000 H+           
      8.5124    7.8353    7.0253    6.2624
      5.4846    4.8396    4.2784    3.7628
*    References DGf or LogK 98sas/sho ; DHf n/a
*    S° 98sas/sho ; Cp 98sas/sho


RhOH++
*     formula= Rh(OH)+2
      charge=  2.0      ion size=  5.7 A      mole wt.=  119.9130 g
      3 species in reaction
      1.0000 Rh+++           1.0000 H2O           -1.0000 H+           
      3.1630    2.4990    1.7110    0.9720
      0.2182    -0.4112    -0.9646    -1.4732
*    References DGf or LogK 98sas/sho ; DHf n/a
*    S° 98sas/sho ; Cp 98sas/sho


RhSO4+
*     formula= Rh(SO4)+
      charge=  1.0      ion size=  4.1 A      mole wt.=  198.9690 g
      2 species in reaction
      1.0000 Rh+++           1.0000 SO4--           
      -1.1063    -1.5603    -2.1867    -2.8680
      -3.7058    -4.5910    -5.6170    -6.9561
*    References DGf or LogK 98sas/sho ; DHf n/a
*    S° 98sas/sho ; Cp 98sas/sho


RhSO4(aq)
*     formula= Rh(SO4)(aq)
      charge=  0.0      ion size=  3.4 A      mole wt.=  198.9690 g
      2 species in reaction
      1.0000 Rh++           1.0000 SO4--           
      -2.4446    -2.4766    -2.6187    -2.8575
      -3.2586    -3.7978    -4.5419    -5.6474
*    References DGf or LogK 98sas/sho ; DHf n/a
*    S° 98sas/sho ; Cp 98sas/sho


Ru(SO4)2-
*     formula= Ru(SO4)2-
      charge=  -1.0      ion size=  3.6 A      mole wt.=  293.1970 g
      2 species in reaction
      1.0000 Ru+++           2.0000 SO4--           
      -1.7617    -2.7101    -3.9995    -5.3735
      -7.0090    -8.6639    -10.4907    -12.7503
*    References DGf or LogK 98sas/sho ; DHf n/a
*    S° 98sas/sho ; Cp 98sas/sho


Ru(SO4)2--
*     formula= Ru(SO4)2-2
      charge=  -2.0      ion size=  4.7 A      mole wt.=  293.1970 g
      2 species in reaction
      1.0000 Ru++           2.0000 SO4--           
      -4.0095    -4.1468    -4.5236    -5.0643
      -5.8447    -6.7479    -7.8363    -9.2654
*    References DGf or LogK 98sas/sho ; DHf n/a
*    S° 98sas/sho ; Cp 98sas/sho


Ru(SO4)3---
*     formula= Ru(SO4)3-3
      charge=  -3.0      ion size=  6.7 A      mole wt.=  389.2610 g
      2 species in reaction
      1.0000 Ru+++           3.0000 SO4--           
      -0.7537    -2.3280    -4.4487    -6.6715
      -9.2324    -11.6961    -14.2477    -17.1749
*    References DGf or LogK 98sas/sho ; DHf n/a
*    S° 98sas/sho ; Cp 98sas/sho


Ru(SO4)3----
*     formula= Ru(SO4)3-4
      charge=  -4.0      ion size=  9.6 A      mole wt.=  389.2610 g
      2 species in reaction
      1.0000 Ru++           3.0000 SO4--           
      -5.0163    -5.3040    -5.9670    -6.8572
      -8.0653    -9.3740    -10.8451    -12.6374
*    References DGf or LogK 98sas/sho ; DHf n/a
*    S° 98sas/sho ; Cp 98sas/sho


RuCl+
*     formula= RuCl+
      charge=  1.0      ion size=  4.1 A      mole wt.=  136.5220 g
      2 species in reaction
      1.0000 Cl-           1.0000 Ru++           
      0.5348    0.4925    0.3275    0.0581
      -0.3596    -0.8579    -1.4576    -2.2286
*    References DGf or LogK 98sas/sho ; DHf n/a
*    S° 98sas/sho ; Cp 98sas/sho


RuCl++
*     formula= RuCl+2
      charge=  2.0      ion size=  5.7 A      mole wt.=  136.5220 g
      2 species in reaction
      1.0000 Cl-           1.0000 Ru+++           
      -2.2746    -2.1829    -2.2577    -2.5020
      -2.9560    -3.5356    -4.2440    -5.1397
*    References DGf or LogK 98sas/sho ; DHf n/a
*    S° 98sas/sho ; Cp 98sas/sho


RuCl2+
*     formula= RuCl2+
      charge=  1.0      ion size=  4.1 A      mole wt.=  171.9750 g
      2 species in reaction
      2.0000 Cl-           1.0000 Ru+++           
      -4.1307    -3.7794    -3.6788    -3.8866
      -4.4613    -5.3075    -6.4300    -7.9482
*    References DGf or LogK 98sas/sho ; DHf n/a
*    S° 98sas/sho ; Cp 98sas/sho


RuCl2
*     formula= RuCl2
      charge=  0.0      ion size=  3.4 A      mole wt.=  171.9750 g
      2 species in reaction
      2.0000 Cl-           1.0000 Ru++           
      1.2219    1.2929    1.1701    0.8464
      0.2491    -0.5381    -1.5518    -2.9298
*    References DGf or LogK 98sas/sho ; DHf n/a
*    S° 98sas/sho ; Cp 98sas/sho


RuCl3(aq)
*     formula= RuCl3(aq)
      charge=  0.0      ion size=  3.4 A      mole wt.=  207.4270 g
      2 species in reaction
      3.0000 Cl-           1.0000 Ru+++           
      -5.0834    -4.3351    -3.8429    -3.7674
      -4.1756    -5.0315    -6.3419    -8.2761
*    References DGf or LogK 98sas/sho ; DHf n/a
*    S° 98sas/sho ; Cp 98sas/sho


RuCl3-
*     formula= RuCl3-
      charge=  -1.0      ion size=  3.6 A      mole wt.=  207.4270 g
      2 species in reaction
      3.0000 Cl-           1.0000 Ru++           
      2.4557    2.7897    2.9050    2.7433
      2.2531    1.5129    0.5161    -0.8558
*    References DGf or LogK 98sas/sho ; DHf n/a
*    S° 98sas/sho ; Cp 98sas/sho


RuCl4-
*     formula= RuCl4-
      charge=  -1.0      ion size=  3.6 A      mole wt.=  242.8800 g
      2 species in reaction
      4.0000 Cl-           1.0000 Ru+++           
      -5.5707    -4.1944    -2.9946    -2.2789
      -2.0484    -2.3783    -3.2314    -4.7680
*    References DGf or LogK 98sas/sho ; DHf n/a
*    S° 98sas/sho ; Cp 98sas/sho


RuCl4--
*     formula= RuCl4-2
      charge=  -2.0      ion size=  4.7 A      mole wt.=  242.8800 g
      2 species in reaction
      4.0000 Cl-           1.0000 Ru++           
      3.2538    4.1398    4.8540    5.2098
      5.2045    4.8337    4.1342    3.0137
*    References DGf or LogK 98sas/sho ; DHf n/a
*    S° 98sas/sho ; Cp 98sas/sho


RuCl5--
*     formula= RuCl5(-2)
      charge=  -2.0      ion size=  4.7 A      mole wt.=  278.3320 g
      2 species in reaction
      5.0000 Cl-           1.0000 Ru+++           
      -6.7451    -3.9071    -1.0838    1.0718
      2.6886    3.4414    3.4682    2.6539
*    References DGf or LogK 98sas/sho ; DHf n/a
*    S° 98sas/sho ; Cp 98sas/sho


RuCl6---
*     formula= RuCl6-3
      charge=  -3.0      ion size=  6.7 A      mole wt.=  313.7840 g
      2 species in reaction
      6.0000 Cl-           1.0000 Ru+++           
      -7.9335    -3.5245    1.1842    5.1413
      8.6294    10.9562    12.3463    12.7176
*    References DGf or LogK 98sas/sho ; DHf n/a
*    S° 98sas/sho ; Cp 98sas/sho


RuO+
*     formula= RuO+
      charge=  1.0      ion size=  4.1 A      mole wt.=  117.0690 g
      3 species in reaction
      1.0000 Ru+++           1.0000 H2O           -2.0000 H+           
      4.5996    3.5105    2.3468    1.3603
      0.4520    -0.2378    -0.8082    -1.3270
*    References DGf or LogK 98sas/sho ; DHf n/a
*    S° 98sas/sho ; Cp 98sas/sho


RuO(aq)
*     formula= RuO(aq)
      charge=  0.0      ion size=  3.4 A      mole wt.=  117.0690 g
      3 species in reaction
      1.0000 Ru++           1.0000 H2O           -2.0000 H+           
      16.6660    15.3998    13.9610    12.6614
      11.3838    10.3551    9.4739    8.6618
*    References DGf or LogK 98sas/sho ; DHf n/a
*    S° 98sas/sho ; Cp 98sas/sho


RuOH+
*     formula= Ru(OH)+
      charge=  1.0      ion size=  4.1 A      mole wt.=  118.0770 g
      3 species in reaction
      1.0000 Ru++           1.0000 H2O           -1.0000 H+           
      8.2214    7.5567    6.7681    6.0311
      5.2851    4.6702    4.1372    3.6479
*    References DGf or LogK 98sas/sho ; DHf n/a
*    S° 98sas/sho ; Cp 98sas/sho


RuOH++
*     formula= Ru(OH)+2
      charge=  2.0      ion size=  5.7 A      mole wt.=  118.0770 g
      3 species in reaction
      1.0000 Ru+++           1.0000 H2O           -1.0000 H+           
      2.8875    2.2351    1.4804    0.7895
      0.1014    -0.4615    -0.9496    -1.3955
*    References DGf or LogK 98sas/sho ; DHf n/a
*    S° 98sas/sho ; Cp 98sas/sho


RuSO4+
*     formula= Ru(SO4)+
      charge=  1.0      ion size=  4.1 A      mole wt.=  197.1340 g
      2 species in reaction
      1.0000 Ru+++           1.0000 SO4--           
      -1.6525    -2.0661    -2.6324    -3.2466
      -4.0057    -4.8187    -5.7781    -7.0554
*    References DGf or LogK 98sas/sho ; DHf n/a
*    S° 98sas/sho ; Cp 98sas/sho


RuSO4(aq)
*     formula= Ru(SO4)(aq)
      charge=  0.0      ion size=  3.4 A      mole wt.=  197.1340 g
      2 species in reaction
      1.0000 Ru++           1.0000 SO4--           
      -2.3626    -2.4033    -2.5554    -2.8032
      -3.2129    -3.7583    -4.5066    -5.6151
*    References DGf or LogK 98sas/sho ; DHf n/a
*    S° 98sas/sho ; Cp 98sas/sho


S--
*     formula= S(-2)
      charge=  -2.0      ion size=  5.0 A      mole wt.=  32.0660 g
      2 species in reaction
      1.0000 HS-           -1.0000 H+           
      18.3161    17.0999    15.8199    14.7928
      13.9379    13.3764    12.9663    12.5688
*    References DGf or LogK 04chi ; DHf n/a
*    S° 04chi ; Cp n/a


S2--
*     formula= S2(-2)
      charge=  -2.0      ion size=  4.7 A      mole wt.=  64.1320 g
      3 species in reaction
      1.5000 HS-           0.2500 S2O3--           -0.7500 H2O           
      3.4677    3.3319    3.1836    3.0487
      2.9140    2.8065    2.7204    2.6530
*    References DGf or LogK n/a ; DHf 04chi
*    S° 04chi ; Cp 88sho/hel


S2O5--
*     formula= S2O5(-2)
      charge=  -2.0      ion size=  4.7 A      mole wt.=  144.1290 g
      3 species in reaction
      2.0000 SO3--           2.0000 H+           -1.0000 H2O           
      -12.9064    -12.8510    -13.0209    -13.4102
      -14.0856    -14.9340    -15.9789    -17.3394
*    References DGf or LogK 04chi ; DHf n/a
*    S° 04chi ; Cp 97asho/sas


S3--
*     formula= S3(-2)
      charge=  -2.0      ion size=  4.7 A      mole wt.=  96.1980 g
      4 species in reaction
      2.0000 HS-           0.5000 S2O3--           1.0000 H+
      -1.5000 H2O           
      -8.6501    -7.9054    -7.1466    -6.5587
      -6.1155    -5.9113    -5.9104    -6.1400
*    References DGf or LogK n/a ; DHf 04chi
*    S° 04chi ; Cp 88sho/hel


S3O6--
*     formula= S3O6(-2)
      charge=  -2.0      ion size=  4.7 A      mole wt.=  192.1940 g
      4 species in reaction
      1.0000 S2O4--           1.0000 SO3--           2.0000 H+
      -1.0000 H2O           
      -20.0676    -18.8823    -17.7269    -16.8786
      -16.3049    -16.1379    -16.3337    -16.9673
*    References DGf or LogK n/a ; DHf 97asho/sas
*    S° 97asho/sas ; Cp 97asho/sas


S4--
*     formula= S4(-2)
      charge=  -2.0      ion size=  4.7 A      mole wt.=  128.2640 g
      4 species in reaction
      2.5000 HS-           0.7500 S2O3--           2.0000 H+
      -2.2500 H2O           
      -19.5656    -18.0394    -16.4869    -15.2801
      -14.3610    -13.9258    -13.9036    -14.3505
*    References DGf or LogK n/a ; DHf 04chi
*    S° 04chi ; Cp 88sho/hel


S4O6--
*     formula= S4O6(-2)
      charge=  -2.0      ion size=  4.7 A      mole wt.=  224.2600 g
      4 species in reaction
      1.0000 S2O3--           1.0000 S2O4--           2.0000 H+
      -1.0000 H2O           
      -28.8209    -27.0570    -25.2529    -23.8269
      -22.7018    -22.1174    -21.9954    -22.3964
*    References DGf or LogK n/a ; DHf 97asho/sas
*    S° 97asho/sas ; Cp 97asho/sas


S5--
*     formula= S5(-2)
      charge=  -2.0      ion size=  4.7 A      mole wt.=  160.3300 g
      4 species in reaction
      3.0000 HS-           1.0000 S2O3--           3.0000 H+
      -3.0000 H2O           
      -30.2405    -27.9531    -25.6301    -23.8251
      -22.4505    -21.8002    -21.7694    -22.4447
*    References DGf or LogK n/a ; DHf 04chi
*    S° 04chi ; Cp 88sho/hel


S5O6--
*     formula= S5O6(-2)
      charge=  -2.0      ion size=  4.7 A      mole wt.=  256.3260 g
      3 species in reaction
      2.5000 S2O3--           3.0000 H+           -1.5000 H2O           
      -0.5733    -0.8732    -1.5092    -2.3835
      -3.6158    -4.9957    -6.5896    -8.5974
*    References DGf or LogK n/a ; DHf 97asho/sas
*    S° 97asho/sas ; Cp 97asho/sas


Sb2S4--
*     formula= Sb2S4(-2)
      charge=  -2.0      ion size=  4.7 A      mole wt.=  371.7840 g
      4 species in reaction
      4.0000 HS-           2.0000 Sb(OH)3(aq)           2.0000 H+
      -6.0000 H2O           
      -47.6916    -43.5273    -38.8219    -34.6480
      -30.7394    -27.9057    -25.9306    -24.7815
*    References DGf or LogK 05bes/app ; DHf n/a
*    S° 05bes/app ; Cp 05bes/app


SCN-
*     formula= SCN-
      charge=  -1.0      ion size=  3.5 A      mole wt.=  58.0830 g
      5 species in reaction
      1.0000 CN-           0.5000 HS-           0.2500 S2O3--
      1.0000 H+           -0.7500 H2O           
      -25.2325    -23.3066    -21.2014    -19.3867
      -17.7368    -16.5831    -15.8196    -15.4320
*    References DGf or LogK 97asho/sas ; DHf n/a
*    S° 97asho/sas ; Cp 97asho/sas


ScO+
*     formula= ScO(+1)
      charge=  1.0      ion size=  4.1 A      mole wt.=  60.9550 g
      3 species in reaction
      1.0000 Sc+++           1.0000 H2O           -2.0000 H+           
      11.4987    9.7337    7.8510    6.2583
      4.8036    3.7225    2.8636    2.1253
*    References DGf or LogK 97asho/sas ; DHf n/a
*    S° 97asho/sas ; Cp 97asho/sas


ScO2-
*     formula= ScO2(-1)
      charge=  -1.0      ion size=  3.6 A      mole wt.=  76.9550 g
      3 species in reaction
      1.0000 Sc+++           2.0000 H2O           -4.0000 H+           
      29.3973    25.9912    22.3044    19.1508
      16.2668    14.1680    12.6053    11.4564
*    References DGf or LogK 97asho/sas ; DHf n/a
*    S° 97asho/sas ; Cp 97asho/sas


ScOH++
*     formula= ScOH(+2)
      charge=  2.0      ion size=  5.7 A      mole wt.=  61.9630 g
      3 species in reaction
      1.0000 Sc+++           1.0000 H2O           -1.0000 H+           
      5.2983    4.3095    3.2306    2.2984
      1.4270    0.7621    0.2208    -0.2496
*    References DGf or LogK 97asho/sas ; DHf n/a
*    S° 97asho/sas ; Cp 97asho/sas


SeCN-
*     formula= SeCN-
      charge=  -1.0      ion size=  3.6 A      mole wt.=  104.9770 g
      5 species in reaction
      1.0000 CN-           0.7500 HSe-           0.2500 SeO4--
      1.2500 H+           -1.0000 H2O           
      -47.4991    -43.8916    -39.8886    -36.3715
      -33.0826    -30.6755    -28.9440    -27.8256
*    References DGf or LogK 97asho/sas ; DHf n/a
*    S° 97asho/sas ; Cp 97asho/sas


SF6(aq)
*     formula= SF6(0)
      charge=  0.0      ion size=  3.4 A      mole wt.=  146.0560 g
      4 species in reaction
      6.0000 F-           1.0000 SO4--           8.0000 H+
      -4.0000 H2O           
      78.4352    70.0590    59.4463    48.8128
      37.2068    26.8372    17.0626    7.0422
*    References DGf or LogK 01sch/sho ; DHf n/a
*    S° 01sch/sho ; Cp 01sch/sho


Si2O2(OH)5-
*     formula= Si2O2(OH)5(-1)
      charge=  -1.0      ion size=  3.6 A      mole wt.=  173.2070 g
      3 species in reaction
      2.0000 H4SiO4(aq)           -1.0000 H2O           -1.0000 H+           
      8.7255    8.4990    8.1801    7.9407
      7.8195    7.8416    7.9506    8.0958
*    References DGf or LogK 01fel/cho ; DHf n/a
*    S° 17bbla ; Cp n/a


Si2O3(OH)4--
*     formula= Si2O3(OH)4(-2)
      charge=  -2.0      ion size=  4.7 A      mole wt.=  172.1990 g
      3 species in reaction
      2.0000 H4SiO4(aq)           -1.0000 H2O           -2.0000 H+           
      20.2461    19.3990    18.5076    17.9059
      17.6172    17.6742    17.9464    18.3378
*    References DGf or LogK 01fel/cho ; DHf n/a
*    S° 17bbla ; Cp n/a


Si3O5(OH)5---
*     formula= Si3O5(OH)5(-3)
      charge=  -3.0      ion size=  4.5 A      mole wt.=  249.2900 g
      3 species in reaction
      3.0000 H4SiO4(aq)           -2.0000 H2O           -3.0000 H+           
      30.6960    29.3980    28.0294    27.0981
      26.6369    26.7003    27.0909    27.6636
*    References DGf or LogK 01fel/cho ; DHf n/a
*    S° 17bbla ; Cp n/a


Si3O6(OH)3---
*     formula= Si3O6(OH)3(-3)
      charge=  -3.0      ion size=  4.5 A      mole wt.=  231.2750 g
      3 species in reaction
      3.0000 H4SiO4(aq)           -3.0000 H2O           -3.0000 H+           
      30.6949    29.3970    28.0285    27.0972
      26.6364    26.7003    27.0916    27.6651
*    References DGf or LogK 07las ; DHf n/a
*    S° 17bbla ; Cp n/a


Si4O12H4----
*     formula= Si4O8(OH)4(-4)
      charge=  -4.0      ion size=  9.6 A      mole wt.=  308.3670 g
      3 species in reaction
      4.0000 H4SiO4(aq)           -4.0000 H2O           -4.0000 H+           
      40.9266    39.1959    37.3713    36.1296
      35.5152    35.6004    36.1221    36.8868
*    References DGf or LogK 01fel/cho ; DHf n/a
*    S° 17bbla ; Cp n/a


Si4O6(OH)6--
*     formula= Si4O6(OH)6(-2)
      charge=  -2.0      ion size=  4.7 A      mole wt.=  310.3820 g
      3 species in reaction
      4.0000 H4SiO4(aq)           -4.0000 H2O           -2.0000 H+           
      15.4841    15.1959    14.7475    14.4413
      14.3698    14.5490    14.8766    15.2583
*    References DGf or LogK 07las ; DHf n/a
*    S° 17bbla ; Cp n/a


Si4O7(OH)6----
*     formula= Si4O7(OH)6(-4)
      charge=  -4.0      ion size=  9.6 A      mole wt.=  326.3820 g
      3 species in reaction
      4.0000 H4SiO4(aq)           -3.0000 H2O           -4.0000 H+           
      40.8185    39.0970    37.2828    36.0506
      35.4453    35.5373    36.0645    36.8333
*    References DGf or LogK 01fel/cho ; DHf n/a
*    S° 17bbla ; Cp n/a


Si4O8(OH)4----
*     formula= Si4O8(OH)4(-4)
      charge=  -4.0      ion size=  9.6 A      mole wt.=  308.3670 g
      3 species in reaction
      4.0000 H4SiO4(aq)           -4.0000 H2O           -4.0000 H+           
      40.8174    39.0959    37.2818    36.0497
      35.4448    35.5373    36.0651    36.8348
*    References DGf or LogK 01fel/cho ; DHf n/a
*    S° 17bbla ; Cp n/a


Si6O15------
*     formula= Si6O15(-6)
      charge=  -6.0      ion size=  4.5 A      mole wt.=  408.5040 g
      3 species in reaction
      6.0000 H4SiO4(aq)           -9.0000 H2O           -6.0000 H+           
      64.3336    61.4909    58.4705    56.3490
      55.1738    55.1019    55.7238    56.7395
*    References DGf or LogK 07las ; DHf n/a
*    S° 17bbla ; Cp n/a


SiF6--
*     formula= SiF6(-2)
      charge=  -2.0      ion size=  4.7 A      mole wt.=  142.0760 g
      4 species in reaction
      6.0000 F-           1.0000 H4SiO4(aq)           4.0000 H+
      -4.0000 H2O           
      -27.3841    -26.2297    -25.2886    -24.7710
      -24.6891    -25.1198    -26.0859    -27.8085
*    References DGf or LogK n/a ; DHf 88sho/hel
*    S° 88sho/hel ; Cp 88sho/hel


SmCl++
*     formula= SmCl+2
      charge=  2.0      ion size=  5.7 A      mole wt.=  185.8120 g
      2 species in reaction
      1.0000 Cl-           1.0000 Sm+++           
      -0.1390    -0.3211    -0.6509    -1.0752
      -1.6521    -2.2836    -2.9992    -3.8731
*    References DGf or LogK 95haa/sho ; DHf n/a
*    S° 95haa/sho ; Cp 95haa/sho


SmCl2+
*     formula= SmCl2+
      charge=  1.0      ion size=  4.1 A      mole wt.=  221.2650 g
      2 species in reaction
      2.0000 Cl-           1.0000 Sm+++           
      0.2805    0.0175    -0.4264    -0.9887
      -1.7663    -2.6526    -3.7144    -5.1046
*    References DGf or LogK 95haa/sho ; DHf n/a
*    S° 95haa/sho ; Cp 95haa/sho


SmCl3(aq)
*     formula= SmCl3(aq)
      charge=  0.0      ion size=  3.4 A      mole wt.=  256.7170 g
      2 species in reaction
      3.0000 Cl-           1.0000 Sm+++           
      0.5546    0.3561    0.0647    -0.3029
      -0.8606    -1.5920    -2.6072    -4.1414
*    References DGf or LogK 95haa/sho ; DHf n/a
*    S° 95haa/sho ; Cp 95haa/sho


SmCl4-
*     formula= SmCl4-
      charge=  -1.0      ion size=  3.6 A      mole wt.=  292.1700 g
      2 species in reaction
      4.0000 Cl-           1.0000 Sm+++           
      0.7359    0.7680    0.9150    1.1036
      1.2577    1.2292    0.8998    0.0354
*    References DGf or LogK 95haa/sho ; DHf n/a
*    S° 95haa/sho ; Cp 95haa/sho


SmCO3+
*     formula= SmCO3+
      charge=  1.0      ion size=  4.1 A      mole wt.=  210.3690 g
      3 species in reaction
      1.0000 HCO3-           1.0000 Sm+++           -1.0000 H+           
      2.3991    2.4624    2.5817    2.7259
      2.8773    2.9598    2.9244    2.6739
*    References DGf or LogK 95haa/sho ; DHf n/a
*    S° 95haa/sho ; Cp 95haa/sho


SmF++
*     formula= SmF+2
      charge=  2.0      ion size=  5.7 A      mole wt.=  169.3580 g
      2 species in reaction
      1.0000 F-           1.0000 Sm+++           
      -4.0924    -4.4085    -4.8956    -5.4634
      -6.1830    -6.9338    -7.7585    -8.7391
*    References DGf or LogK 95haa/sho ; DHf n/a
*    S° 95haa/sho ; Cp 95haa/sho


SmF2+
*     formula= SmF2+
      charge=  1.0      ion size=  4.1 A      mole wt.=  188.3570 g
      2 species in reaction
      2.0000 F-           1.0000 Sm+++           
      -7.5663    -7.7175    -8.0444    -8.5011
      -9.1759    -9.9884    -11.0065    -12.3839
*    References DGf or LogK 95haa/sho ; DHf n/a
*    S° 95haa/sho ; Cp 95haa/sho


SmF3(aq)
*     formula= SmF3(aq)
      charge=  0.0      ion size=  3.4 A      mole wt.=  207.3550 g
      2 species in reaction
      3.0000 F-           1.0000 Sm+++           
      -10.3228    -10.1469    -10.0310    -10.0336
      -10.2408    -10.7135    -11.5504    -12.9790
*    References DGf or LogK 95haa/sho ; DHf n/a
*    S° 95haa/sho ; Cp 95haa/sho


SmF4-
*     formula= SmF4-
      charge=  -1.0      ion size=  3.6 A      mole wt.=  226.3540 g
      2 species in reaction
      4.0000 F-           1.0000 Sm+++           
      -12.9086    -12.1365    -11.1785    -10.2622
      -9.3981    -8.8775    -8.7873    -9.3555
*    References DGf or LogK 95haa/sho ; DHf n/a
*    S° 95haa/sho ; Cp 95haa/sho


SmH2PO4++
*     formula= SmH2PO4+2
      charge=  2.0      ion size=  5.7 A      mole wt.=  247.3470 g
      2 species in reaction
      1.0000 H2PO4-           1.0000 Sm+++           
      -1.1967    -1.0365    -1.0181    -1.1534
      -1.4666    -1.9009    -2.4596    -3.2000
*    References DGf or LogK 95haa/sho ; DHf n/a
*    S° 95haa/sho ; Cp 95haa/sho


SmHCO3++
*     formula= SmHCO3+2
      charge=  2.0      ion size=  5.7 A      mole wt.=  211.3770 g
      2 species in reaction
      1.0000 HCO3-           1.0000 Sm+++           
      -1.7166    -1.7890    -2.0342    -2.4087
      -2.9586    -3.5842    -4.3044    -5.1847
*    References DGf or LogK 95haa/sho ; DHf n/a
*    S° 95haa/sho ; Cp 95haa/sho


SmNO3++
*     formula= SmNO3+2
      charge=  2.0      ion size=  5.7 A      mole wt.=  212.3650 g
      2 species in reaction
      1.0000 NO3-           1.0000 Sm+++           
      -1.3345    -0.8012    -0.3357    -0.0431
      0.0900    0.0340    -0.1912    -0.6249
*    References DGf or LogK 95haa/sho ; DHf n/a
*    S° 95haa/sho ; Cp 95haa/sho


SmO+
*     formula= SmO+
      charge=  1.0      ion size=  4.1 A      mole wt.=  166.3590 g
      3 species in reaction
      1.0000 Sm+++           1.0000 H2O           -2.0000 H+           
      18.9329    16.4773    13.7724    11.4022
      9.1562    7.4298    6.0328    4.8353
*    References DGf or LogK 95haa/sho ; DHf n/a
*    S° 95haa/sho ; Cp 95haa/sho


SmO2-
*     formula= SmO2-
      charge=  -1.0      ion size=  3.6 A      mole wt.=  182.3590 g
      3 species in reaction
      1.0000 Sm+++           2.0000 H2O           -4.0000 H+           
      39.3712    35.0071    30.2318    26.0938
      22.2514    19.4046    17.2407    15.5889
*    References DGf or LogK 95haa/sho ; DHf n/a
*    S° 95haa/sho ; Cp 95haa/sho


SmO2H(aq)
*     formula= SmO2H(aq)
      charge=  0.0      ion size=  3.4 A      mole wt.=  183.3670 g
      3 species in reaction
      1.0000 Sm+++           2.0000 H2O           -3.0000 H+           
      29.6699    25.9179    21.8887    18.4605
      15.3265    13.0164    11.2185    9.7060
*    References DGf or LogK 95haa/sho ; DHf n/a
*    S° 95haa/sho ; Cp 95haa/sho


SmOH++
*     formula= SmOH+2
      charge=  2.0      ion size=  5.7 A      mole wt.=  167.3670 g
      3 species in reaction
      1.0000 Sm+++           1.0000 H2O           -1.0000 H+           
      9.2918    7.9745    6.4790    5.1313
      3.8168    2.7757    1.9116    1.1604
*    References DGf or LogK 95haa/sho ; DHf n/a
*    S° 95haa/sho ; Cp 95haa/sho


SmSO4+
*     formula= SmSO4+
      charge=  1.0      ion size=  4.1 A      mole wt.=  246.4240 g
      2 species in reaction
      1.0000 SO4--           1.0000 Sm+++           
      -3.4413    -3.7227    -4.1339    -4.6034
      -5.2164    -5.9104    -6.7697    -7.9593
*    References DGf or LogK 95haa/sho ; DHf n/a
*    S° 95haa/sho ; Cp 95haa/sho


SnO(aq)
*     formula= SnO(0)
      charge=  0.0      ion size=  3.4 A      mole wt.=  134.7090 g
      3 species in reaction
      1.0000 Sn++           1.0000 H2O           -2.0000 H+           
      7.7957    7.0729    6.3255    5.7195
      5.1945    4.8231    4.5307    4.2558
*    References DGf or LogK 97asho/sas ; DHf n/a
*    S° 97asho/sas ; Cp 97asho/sas


SnOH+
*     formula= SnOH(+1)
      charge=  1.0      ion size=  4.1 A      mole wt.=  135.7170 g
      3 species in reaction
      1.0000 Sn++           1.0000 H2O           -1.0000 H+           
      3.8637    3.4079    2.9216    2.5156
      2.1513    1.8825    1.6624    1.4536
*    References DGf or LogK 97asho/sas ; DHf n/a
*    S° 97asho/sas ; Cp 97asho/sas


Sr(CO3)(aq)
*     formula= Sr(CO3)(0)
      charge=  0.0      ion size=  3.4 A      mole wt.=  147.6290 g
      3 species in reaction
      1.0000 HCO3-           1.0000 Sr++           -1.0000 H+           
      8.1228    7.5217    6.8683    6.2976
      5.7342    5.2423    4.7336    4.0891
*    References DGf or LogK 84bus/plu ; DHf n/a
*    S° 84bus/plu ; Cp 97sve/sho


Sr(HCO3)+
*     formula= Sr(HCO3)(+1)
      charge=  1.0      ion size=  4.1 A      mole wt.=  148.6370 g
      2 species in reaction
      1.0000 HCO3-           1.0000 Sr++           
      -0.8398    -1.1800    -1.7238    -2.3637
      -3.1687    -3.9932    -4.8791    -5.9177
*    References DGf or LogK 84bus/plu ; DHf n/a
*    S° 84bus/plu ; Cp 95sho/kor


SrAsO4-
*     formula= SrAsO4-
      charge=  -1.0      ion size=  3.6 A      mole wt.=  226.5390 g
      3 species in reaction
      1.0000 H2AsO4-           1.0000 Sr++           -2.0000 H+           
      15.3628    13.5857    11.7051    10.1411
      8.7525    7.7613    7.0048    6.3601
*    References DGf or LogK 07mar/acc ; DHf n/a
*    S° 07mar/acc ; Cp 07mar/acc


SrCl+
*     formula= SrCl(+)
      charge=  1.0      ion size=  4.1 A      mole wt.=  123.0720 g
      2 species in reaction
      1.0000 Cl-           1.0000 Sr++           
      0.3040    0.2300    0.0313    -0.2664
      -0.7096    -1.2267    -1.8414    -2.6273
*    References DGf or LogK 96bou ; DHf n/a
*    S° 97sve/sho ; Cp 97sve/sho


SrF+
*     formula= SrF(+)
      charge=  1.0      ion size=  4.1 A      mole wt.=  106.6180 g
      2 species in reaction
      1.0000 F-           1.0000 Sr++           
      -0.1474    -0.1737    -0.3224    -0.5726
      -0.9641    -1.4354    -2.0095    -2.7594
*    References DGf or LogK 97sve/sho ; DHf n/a
*    S° 97sve/sho ; Cp 97sve/sho


SrH2AsO3+
*     formula= SrH2AsO3+
      charge=  1.0      ion size=  4.1 A      mole wt.=  212.5560 g
      2 species in reaction
      1.0000 H2AsO3-           1.0000 Sr++           
      -0.3824    -0.3992    -0.3999    -0.3833
      -0.3667    -0.3856    -0.4789    -0.7159
*    References DGf or LogK 07mar/acc ; DHf n/a
*    S° 07mar/acc ; Cp 07mar/acc


SrH2AsO4+
*     formula= SrH2AsO4+
      charge=  1.0      ion size=  4.1 A      mole wt.=  228.5550 g
      2 species in reaction
      1.0000 H2AsO4-           1.0000 Sr++           
      -0.8053    -0.8200    -0.9452    -1.1604
      -1.4997    -1.9131    -2.4255    -3.1116
*    References DGf or LogK 07mar/acc ; DHf n/a
*    S° 07mar/acc ; Cp 07mar/acc


SrH2PO4+
*     formula= SrH2PO4+
      charge=  1.0      ion size=  4.1 A      mole wt.=  184.6070 g
      2 species in reaction
      1.0000 H2PO4-           1.0000 Sr++           
      -0.8300    -0.8300    -0.8300    -0.8300
      -0.8300    -0.8300    -0.8300    -0.8300
*    References DGf or LogK 97smi/mar ; DHf n/a
*    S° n/a ; Cp n/a


SrHAsO4
*     formula= SrHAsO4
      charge=  0.0      ion size=  3.4 A      mole wt.=  227.5470 g
      3 species in reaction
      1.0000 H2AsO4-           1.0000 Sr++           -1.0000 H+           
      5.4080    5.1510    4.8541    4.5747
      4.2638    3.9444    3.5567    3.0010
*    References DGf or LogK 07mar/acc ; DHf n/a
*    S° 07mar/acc ; Cp 07mar/acc


SrHPO4(aq)
*     formula= SrHPO4(0)
      charge=  0.0      ion size=  3.4 A      mole wt.=  183.5990 g
      3 species in reaction
      1.0000 H2PO4-           1.0000 Sr++           -1.0000 H+           
      4.7000    4.7000    4.7000    4.7000
      4.7000    4.7000    4.7000    4.7000
*    References DGf or LogK 97smi/mar ; DHf n/a
*    S° n/a ; Cp n/a


SrOH+
*     formula= SrOH(+)
      charge=  1.0      ion size=  4.1 A      mole wt.=  104.6270 g
      3 species in reaction
      1.0000 Sr++           1.0000 H2O           -1.0000 H+           
      14.6300    13.2910    11.7912    10.4602
      9.1870    8.2036    7.4086    6.7299
*    References DGf or LogK 76bae/mes ; DHf n/a
*    S° 97asho/sas ; Cp 97asho/sas


SrP2O7--
*     formula= SrP2O7(-2)
      charge=  -2.0      ion size=  4.7 A      mole wt.=  261.5630 g
      4 species in reaction
      2.0000 H2PO4-           1.0000 Sr++           -1.0000 H2O
      -2.0000 H+           
      12.4100    12.4100    12.4100    12.4100
      12.4100    12.4100    12.4100    12.4100
*    References DGf or LogK 76smi/mar ; DHf n/a
*    S° n/a ; Cp n/a


SrPO4-
*     formula= SrPO4-
      charge=  -1.0      ion size=  3.6 A      mole wt.=  182.5910 g
      3 species in reaction
      1.0000 H2PO4-           1.0000 Sr++           -2.0000 H+           
      13.5600    13.5600    13.5600    13.5600
      13.5600    13.5600    13.5600    13.5600
*    References DGf or LogK 96bou ; DHf n/a
*    S° n/a ; Cp n/a


SrSO4(aq)
*     formula= SrSO4(0)
      charge=  0.0      ion size=  3.4 A      mole wt.=  183.6840 g
      2 species in reaction
      1.0000 SO4--           1.0000 Sr++           
      -2.2185    -2.3000    -2.4497    -2.6132
      -2.8275    -3.1101    -3.5507    -4.3208
*    References DGf or LogK 06bla/ign ; DHf 06bla/ign
*    S° n/a ; Cp n/a


TbCl++
*     formula= TbCl+2
      charge=  2.0      ion size=  5.7 A      mole wt.=  194.3780 g
      2 species in reaction
      1.0000 Cl-           1.0000 Tb+++           
      -0.0819    -0.2478    -0.5799    -1.0252
      -1.6427    -2.3233    -3.0924    -4.0214
*    References DGf or LogK 95haa/sho ; DHf n/a
*    S° 95haa/sho ; Cp 95haa/sho


TbCl2+
*     formula= TbCl2+
      charge=  1.0      ion size=  4.1 A      mole wt.=  229.8300 g
      2 species in reaction
      2.0000 Cl-           1.0000 Tb+++           
      0.2243    0.0175    -0.4186    -1.0246
      -1.8981    -2.9044    -4.0981    -5.6251
*    References DGf or LogK 95haa/sho ; DHf n/a
*    S° 95haa/sho ; Cp 95haa/sho


TbCl3(aq)
*     formula= TbCl3(aq)
      charge=  0.0      ion size=  3.4 A      mole wt.=  265.2830 g
      2 species in reaction
      3.0000 Cl-           1.0000 Tb+++           
      0.5247    0.4294    0.1490    -0.3050
      -1.0489    -2.0124    -3.2835    -5.0841
*    References DGf or LogK 95haa/sho ; DHf n/a
*    S° 95haa/sho ; Cp 95haa/sho


TbCl4-
*     formula= TbCl4-
      charge=  -1.0      ion size=  3.6 A      mole wt.=  300.7350 g
      2 species in reaction
      4.0000 Cl-           1.0000 Tb+++           
      0.6297    0.8413    1.0209    1.0848
      0.9570    0.5747    -0.1431    -1.4097
*    References DGf or LogK 95haa/sho ; DHf n/a
*    S° 95haa/sho ; Cp 95haa/sho


TbCO3+
*     formula= TbCO3+
      charge=  1.0      ion size=  4.1 A      mole wt.=  218.9340 g
      3 species in reaction
      1.0000 HCO3-           1.0000 Tb+++           -1.0000 H+           
      2.2988    2.3891    2.5286    2.6785
      2.8167    2.8673    2.7857    2.4878
*    References DGf or LogK 95haa/sho ; DHf n/a
*    S° 95haa/sho ; Cp 95haa/sho


TbF++
*     formula= TbF+2
      charge=  2.0      ion size=  5.7 A      mole wt.=  177.9240 g
      2 species in reaction
      1.0000 F-           1.0000 Tb+++           
      -4.3993    -4.7017    -5.1939    -5.7854
      -6.5488    -7.3523    -8.2347    -9.2747
*    References DGf or LogK 95haa/sho ; DHf n/a
*    S° 95haa/sho ; Cp 95haa/sho


TbF2+
*     formula= TbF2+
      charge=  1.0      ion size=  4.1 A      mole wt.=  196.9220 g
      2 species in reaction
      2.0000 F-           1.0000 Tb+++           
      -8.1266    -8.2306    -8.5601    -9.0701
      -9.8512    -10.7932    -11.9527    -13.4764
*    References DGf or LogK 95haa/sho ; DHf n/a
*    S° 95haa/sho ; Cp 95haa/sho


TbF3(aq)
*     formula= TbF3(aq)
      charge=  0.0      ion size=  3.4 A      mole wt.=  215.9210 g
      2 species in reaction
      3.0000 F-           1.0000 Tb+++           
      -11.0787    -10.8066    -10.6876    -10.7840
      -11.1844    -11.8949    -12.9923    -14.6910
*    References DGf or LogK 95haa/sho ; DHf n/a
*    S° 95haa/sho ; Cp 95haa/sho


TbF4-
*     formula= TbF4-
      charge=  -1.0      ion size=  3.6 A      mole wt.=  234.9190 g
      2 species in reaction
      4.0000 F-           1.0000 Tb+++           
      -13.8908    -12.9428    -11.9562    -11.1685
      -10.5916    -10.4315    -10.7388    -11.7233
*    References DGf or LogK 95haa/sho ; DHf n/a
*    S° 95haa/sho ; Cp 95haa/sho


TbH2PO4++
*     formula= TbH2PO4+2
      charge=  2.0      ion size=  5.7 A      mole wt.=  255.9130 g
      2 species in reaction
      1.0000 H2PO4-           1.0000 Tb+++           
      -1.1556    -0.9632    -0.9287    -1.0682
      -1.4054    -1.8757    -2.4771    -3.2639
*    References DGf or LogK 95haa/sho ; DHf n/a
*    S° 95haa/sho ; Cp 95haa/sho


TbHCO3++
*     formula= TbHCO3+2
      charge=  2.0      ion size=  5.7 A      mole wt.=  219.9420 g
      2 species in reaction
      1.0000 HCO3-           1.0000 Tb+++           
      -2.0280    -1.7157    -1.5408    -1.5492
      -1.7540    -2.1161    -2.6264    -3.3338
*    References DGf or LogK 95haa/sho ; DHf n/a
*    S° 95haa/sho ; Cp 95haa/sho


TbNO3++
*     formula= TbNO3+2
      charge=  2.0      ion size=  5.7 A      mole wt.=  220.9300 g
      2 species in reaction
      1.0000 NO3-           1.0000 Tb+++           
      -1.0814    -0.5080    -0.0174    0.2794
      0.3973    0.3131    0.0523    -0.4215
*    References DGf or LogK 95haa/sho ; DHf n/a
*    S° 95haa/sho ; Cp 95haa/sho


TbO+
*     formula= TbO+
      charge=  1.0      ion size=  4.1 A      mole wt.=  174.9250 g
      3 species in reaction
      1.0000 Tb+++           1.0000 H2O           -2.0000 H+           
      18.5868    16.1841    13.5444    11.2379
      9.0580    7.3861    6.0351    4.8786
*    References DGf or LogK 95haa/sho ; DHf n/a
*    S° 95haa/sho ; Cp 95haa/sho


TbO2-
*     formula= TbO2-
      charge=  -1.0      ion size=  3.6 A      mole wt.=  190.9240 g
      3 species in reaction
      1.0000 Tb+++           2.0000 H2O           -4.0000 H+           
      38.4455    34.2008    29.5541    25.5259
      21.7831    19.0079    16.8971    15.2892
*    References DGf or LogK 95haa/sho ; DHf n/a
*    S° 95haa/sho ; Cp 95haa/sho


TbO2H(aq)
*     formula= TbO2H(aq)
      charge=  0.0      ion size=  3.4 A      mole wt.=  191.9320 g
      3 species in reaction
      1.0000 Tb+++           2.0000 H2O           -3.0000 H+           
      28.6737    25.0383    21.1389    17.8283
      14.8118    12.6009    10.8980    9.5005
*    References DGf or LogK 95haa/sho ; DHf n/a
*    S° 95haa/sho ; Cp 95haa/sho


TbOH++
*     formula= TbOH+2
      charge=  2.0      ion size=  5.7 A      mole wt.=  175.9330 g
      3 species in reaction
      1.0000 Tb+++           1.0000 H2O           -1.0000 H+           
      9.1121    7.8279    6.3757    5.0722
      3.8051    2.8044    1.9747    1.2540
*    References DGf or LogK 95haa/sho ; DHf n/a
*    S° 95haa/sho ; Cp 95haa/sho


TbSO4+
*     formula= TbSO4+
      charge=  1.0      ion size=  4.1 A      mole wt.=  254.9890 g
      2 species in reaction
      1.0000 SO4--           1.0000 Tb+++           
      -3.4513    -3.7227    -4.1224    -4.5816
      -5.1848    -5.8715    -6.7250    -7.9089
*    References DGf or LogK 95haa/sho ; DHf n/a
*    S° 95haa/sho ; Cp 95haa/sho


Tl(OH)2+
*     formula= Tl(OH)2+
      charge=  1.0      ion size=  4.1 A      mole wt.=  238.3980 g
      3 species in reaction
      1.0000 Tl+++           2.0000 H2O           -2.0000 H+           
      2.5637    1.5720    0.5198    -0.3485
      -1.1184    -1.6842    -2.1545    -2.6141
*    References DGf or LogK 81tur/whi ; DHf n/a
*    S° 17abla ; Cp n/a


Tl(SO4)+
*     formula= Tl(SO4)+
      charge=  1.0      ion size=  4.1 A      mole wt.=  300.4470 g
      2 species in reaction
      1.0000 Tl+++           1.0000 SO4--           
      -4.2482    -4.3800    -4.6689    -5.0665
      -5.6541    -6.3756    -7.3099    -8.6252
*    References DGf or LogK 81tur/whi ; DHf n/a
*    S° 17abla ; Cp n/a


TlCl++
*     formula= TlCl(2)
      charge=  2.0      ion size=  5.7 A      mole wt.=  239.8350 g
      2 species in reaction
      1.0000 Tl+++           1.0000 Cl-           
      -8.1967    -7.7427    -7.2657    -6.8852
      -6.6010    -6.4978    -6.5777    -6.8950
*    References DGf or LogK 97sve/sho ; DHf n/a
*    S° 82wag/eva ; Cp 97sve/sho


TlCl(aq)
*     formula= TlCl(0)
      charge=  0.0      ion size=  3.4 A      mole wt.=  239.8350 g
      2 species in reaction
      1.0000 Cl-           1.0000 Tl+           
      -0.7204    -0.5227    -0.3226    -0.1747
      -0.0869    -0.0977    -0.2212    -0.5192
*    References DGf or LogK 97sve/sho ; DHf 09xio
*    S° n/a ; Cp 97sve/sho


TlCl2+
*     formula= TlCl2+
      charge=  1.0      ion size=  4.1 A      mole wt.=  275.2880 g
      2 species in reaction
      1.0000 Tl+++           2.0000 Cl-           
      -14.2701    -13.5000    -12.7422    -12.1884
      -11.8521    -11.8568    -12.2188    -13.0646
*    References DGf or LogK 81tur/whi ; DHf n/a
*    S° 82wag/eva ; Cp n/a


TlCl2-
*     formula= TlCl2-
      charge=  -1.0      ion size=  3.6 A      mole wt.=  275.2880 g
      2 species in reaction
      1.0000 Tl+           2.0000 Cl-           
      -0.3390    -0.0030    0.2680    0.4077
      0.3987    0.2103    -0.1862    -0.9123
*    References DGf or LogK 09xio ; DHf 82wag/eva
*    S° n/a ; Cp n/a


TlCl3
*     formula= TlCl3
      charge=  0.0      ion size=  3.4 A      mole wt.=  310.7400 g
      2 species in reaction
      1.0000 Tl+++           3.0000 Cl-           
      -17.3399    -16.5000    -15.7269    -15.2270
      -15.0352    -15.2603    -15.9338    -17.2421
*    References DGf or LogK 81tur/whi ; DHf n/a
*    S° 82wag/eva ; Cp n/a


TlCl4-
*     formula= TlCl4-
      charge=  -1.0      ion size=  3.6 A      mole wt.=  346.1930 g
      2 species in reaction
      1.0000 Tl+++           4.0000 Cl-           
      -19.1245    -18.3400    -17.6955    -17.3807
      -17.4626    -18.0102    -19.0776    -20.9165
*    References DGf or LogK 81tur/whi ; DHf n/a
*    S° 82wag/eva ; Cp n/a


TlCO3-
*     formula= TlCO3-
      charge=  -1.0      ion size=  3.6 A      mole wt.=  264.3920 g
      3 species in reaction
      1.0000 Tl+           1.0000 HCO3-           -1.0000 H+           
      8.3521    8.1700    7.9822    7.8509
      7.7613    7.7017    7.6154    7.4162
*    References DGf or LogK 09xio ; DHf 17abla
*    S° n/a ; Cp n/a


TlF(aq)
*     formula= TlF(0)
      charge=  0.0      ion size=  3.4 A      mole wt.=  223.3810 g
      2 species in reaction
      1.0000 F-           1.0000 Tl+           
      0.0072    -0.1000    -0.2542    -0.4293
      -0.6591    -0.9237    -1.2604    -1.7463
*    References DGf or LogK 09xio ; DHf n/a
*    S° 97sve/sho ; Cp 97sve/sho


TlHCO3
*     formula= TlHCO3
      charge=  0.0      ion size=  3.4 A      mole wt.=  265.4000 g
      2 species in reaction
      1.0000 Tl+           1.0000 HCO3-           
      -0.7918    -0.9000    -1.0875    -1.3158
      -1.6152    -1.9413    -2.3249    -2.8370
*    References DGf or LogK 09xio ; DHf 17abla
*    S° n/a ; Cp n/a


TlHS
*     formula= TlHS
      charge=  0.0      ion size=  3.4 A      mole wt.=  237.4570 g
      2 species in reaction
      1.0000 HS-           1.0000 Tl+           
      -2.6027    -2.7100    -2.8966    -3.1210
      -3.4126    -3.7309    -4.1100    -4.6251
*    References DGf or LogK 09xio ; DHf 17abla
*    S° n/a ; Cp n/a


TlO2-
*     formula= TlO2(-1)
      charge=  -1.0      ion size=  3.6 A      mole wt.=  236.3820 g
      3 species in reaction
      1.0000 Tl+++           2.0000 H2O           -4.0000 H+           
      17.6511    15.0020    12.3307    10.2338
      8.5222    7.4546    6.8027    6.4501
*    References DGf or LogK 81tur/whi ; DHf n/a
*    S° 97asho/sas ; Cp 97asho/sas


TlOH++
*     formula= TlOH(+2)
      charge=  2.0      ion size=  5.7 A      mole wt.=  221.3900 g
      3 species in reaction
      1.0000 Tl+++           1.0000 H2O           -1.0000 H+           
      0.8417    0.6445    0.4839    0.4011
      0.3820    0.4087    0.4480    0.4760
*    References DGf or LogK 97asho/sas ; DHf n/a
*    S° 97asho/sas ; Cp 97asho/sas


TlOH(aq)
*     formula= TlOH(0)
      charge=  0.0      ion size=  3.4 A      mole wt.=  221.3900 g
      3 species in reaction
      1.0000 Tl+           1.0000 H2O           -1.0000 H+           
      14.2841    13.3110    12.2904    11.4542
      10.7352    10.2552    9.9328    9.7133
*    References DGf or LogK 09xio ; DHf n/a
*    S° 97asho/sas ; Cp 97asho/sas


TlPO4--
*     formula= TlPO4-2
      charge=  -2.0      ion size=  4.7 A      mole wt.=  299.3540 g
      3 species in reaction
      1.0000 Tl+           1.0000 H2PO4-           -2.0000 H+           
      16.1162    16.0200    16.0215    16.1662
      16.4686    16.8237    17.1570    17.3719
*    References DGf or LogK 09xio ; DHf 17abla
*    S° n/a ; Cp n/a


TlSO4-
*     formula= TlSO4-
      charge=  -1.0      ion size=  3.6 A      mole wt.=  300.4470 g
      2 species in reaction
      1.0000 Tl+           1.0000 SO4--           
      -1.4469    -1.3800    -1.4182    -1.5438
      -1.7864    -2.1342    -2.6413    -3.4470
*    References DGf or LogK 09xio ; DHf 82wag/eva
*    S° n/a ; Cp n/a


TmCl++
*     formula= TmCl+2
      charge=  2.0      ion size=  5.7 A      mole wt.=  204.3870 g
      2 species in reaction
      1.0000 Cl-           1.0000 Tm+++           
      -0.1000    -0.2478    -0.5640    -0.9990
      -1.6101    -2.2883    -3.0570    -3.9867
*    References DGf or LogK 95haa/sho ; DHf n/a
*    S° 95haa/sho ; Cp 95haa/sho


TmCl2+
*     formula= TmCl2+
      charge=  1.0      ion size=  4.1 A      mole wt.=  239.8390 g
      2 species in reaction
      2.0000 Cl-           1.0000 Tm+++           
      0.1785    0.0175    -0.3794    -0.9612
      -1.8219    -2.8264    -4.0245    -5.5596
*    References DGf or LogK 95haa/sho ; DHf n/a
*    S° 95haa/sho ; Cp 95haa/sho


TmCl3(aq)
*     formula= TmCl3(aq)
      charge=  0.0      ion size=  3.4 A      mole wt.=  275.2910 g
      2 species in reaction
      3.0000 Cl-           1.0000 Tm+++           
      0.4341    0.4294    0.2280    -0.1762
      -0.8949    -1.8587    -3.1465    -4.9741
*    References DGf or LogK 95haa/sho ; DHf n/a
*    S° 95haa/sho ; Cp 95haa/sho


TmCl4-
*     formula= TmCl4-
      charge=  -1.0      ion size=  3.6 A      mole wt.=  310.7440 g
      2 species in reaction
      4.0000 Cl-           1.0000 Tm+++           
      0.4742    0.8413    1.1587    1.3131
      1.2396    0.8731    0.1486    -1.1401
*    References DGf or LogK 95haa/sho ; DHf n/a
*    S° 95haa/sho ; Cp 95haa/sho


TmCO3+
*     formula= TmCO3+
      charge=  1.0      ion size=  4.1 A      mole wt.=  228.9430 g
      3 species in reaction
      1.0000 HCO3-           1.0000 Tm+++           -1.0000 H+           
      1.9671    2.0959    2.2904    2.5034
      2.7223    2.8577    2.8634    2.6410
*    References DGf or LogK 95haa/sho ; DHf n/a
*    S° 95haa/sho ; Cp 95haa/sho


TmF++
*     formula= TmF+2
      charge=  2.0      ion size=  5.7 A      mole wt.=  187.9330 g
      2 species in reaction
      1.0000 F-           1.0000 Tm+++           
      -4.5334    -4.8483    -5.3598    -5.9731
      -6.7626    -7.5902    -8.4948    -9.5552
*    References DGf or LogK 95haa/sho ; DHf n/a
*    S° 95haa/sho ; Cp 95haa/sho


TmF2+
*     formula= TmF2+
      charge=  1.0      ion size=  4.1 A      mole wt.=  206.9310 g
      2 species in reaction
      2.0000 F-           1.0000 Tm+++           
      -8.3443    -8.4505    -8.7958    -9.3320
      -10.1509    -11.1326    -12.3319    -13.8947
*    References DGf or LogK 95haa/sho ; DHf n/a
*    S° 95haa/sho ; Cp 95haa/sho


TmF3(aq)
*     formula= TmF3(aq)
      charge=  0.0      ion size=  3.4 A      mole wt.=  225.9290 g
      2 species in reaction
      3.0000 F-           1.0000 Tm+++           
      -11.3974    -11.0998    -10.9766    -11.0915
      -11.5340    -12.2978    -13.4547    -15.2158
*    References DGf or LogK 95haa/sho ; DHf n/a
*    S° 95haa/sho ; Cp 95haa/sho


TmF4-
*     formula= TmF4-
      charge=  -1.0      ion size=  3.6 A      mole wt.=  244.9280 g
      2 species in reaction
      4.0000 F-           1.0000 Tm+++           
      -14.3422    -13.3093    -12.2657    -11.4618
      -10.9051    -10.7906    -11.1585    -12.2161
*    References DGf or LogK 95haa/sho ; DHf n/a
*    S° 95haa/sho ; Cp 95haa/sho


TmH2PO4++
*     formula= TmH2PO4+2
      charge=  2.0      ion size=  5.7 A      mole wt.=  265.9210 g
      2 species in reaction
      1.0000 H2PO4-           1.0000 Tm+++           
      -1.2757    -1.0365    -0.9532    -1.0522
      -1.3531    -1.7969    -2.3779    -3.1487
*    References DGf or LogK 95haa/sho ; DHf n/a
*    S° 95haa/sho ; Cp 95haa/sho


TmHCO3++
*     formula= TmHCO3+2
      charge=  2.0      ion size=  5.7 A      mole wt.=  229.9510 g
      2 species in reaction
      1.0000 HCO3-           1.0000 Tm+++           
      -1.7897    -1.7890    -1.9762    -2.3206
      -2.8643    -3.5038    -4.2493    -5.1602
*    References DGf or LogK 95haa/sho ; DHf n/a
*    S° 95haa/sho ; Cp 95haa/sho


TmNO3++
*     formula= TmNO3+2
      charge=  2.0      ion size=  5.7 A      mole wt.=  230.9390 g
      2 species in reaction
      1.0000 NO3-           1.0000 Tm+++           
      -0.8356    -0.2148    0.3251    0.6631
      0.8185    0.7626    0.5248    0.0692
*    References DGf or LogK 95haa/sho ; DHf n/a
*    S° 95haa/sho ; Cp 95haa/sho


TmO+
*     formula= TmO+
      charge=  1.0      ion size=  4.1 A      mole wt.=  184.9340 g
      3 species in reaction
      1.0000 Tm+++           1.0000 H2O           -2.0000 H+           
      18.2279    15.8909    13.3153    11.0575
      8.9164    7.2686    5.9333    4.7890
*    References DGf or LogK 95haa/sho ; DHf n/a
*    S° 95haa/sho ; Cp 95haa/sho


TmO2-
*     formula= TmO2-
      charge=  -1.0      ion size=  3.6 A      mole wt.=  200.9330 g
      3 species in reaction
      1.0000 Tm+++           2.0000 H2O           -4.0000 H+           
      36.7034    32.6615    28.2199    24.3546
      20.7482    18.0619    16.0108    14.4471
*    References DGf or LogK 95haa/sho ; DHf n/a
*    S° 95haa/sho ; Cp 95haa/sho


TmO2H(aq)
*     formula= TmO2H(aq)
      charge=  0.0      ion size=  3.4 A      mole wt.=  201.9410 g
      3 species in reaction
      1.0000 Tm+++           2.0000 H2O           -3.0000 H+           
      27.6602    24.1587    20.3867    17.1691
      14.2204    12.0430    10.3511    8.9500
*    References DGf or LogK 95haa/sho ; DHf n/a
*    S° 95haa/sho ; Cp 95haa/sho


TmOH++
*     formula= TmOH+2
      charge=  2.0      ion size=  5.7 A      mole wt.=  185.9420 g
      3 species in reaction
      1.0000 Tm+++           1.0000 H2O           -1.0000 H+           
      8.9217    7.6813    6.2692    4.9935
      3.7455    2.7537    1.9276    1.2082
*    References DGf or LogK 95haa/sho ; DHf n/a
*    S° 95haa/sho ; Cp 95haa/sho


TmSO4+
*     formula= TmSO4+
      charge=  1.0      ion size=  4.1 A      mole wt.=  264.9980 g
      2 species in reaction
      1.0000 SO4--           1.0000 Tm+++           
      -3.3713    -3.6494    -4.0568    -4.5229
      -5.1329    -5.8250    -6.6834    -7.8728
*    References DGf or LogK 95haa/sho ; DHf n/a
*    S° 95haa/sho ; Cp 95haa/sho


U(OH)+++
*     formula= U(OH)+3
      charge=  3.0      ion size=  8.2 A      mole wt.=  255.0360 g
      3 species in reaction
      1.0000 U++++           1.0000 H2O           -1.0000 H+           
      1.2859    0.5346    -0.3234    -1.1009
      -1.8692    -2.4943    -3.0343    -3.5216
*    References DGf or LogK 97bsho/sas ; DHf n/a
*    S° 97bsho/sas ; Cp 97bsho/sas


UO+
*     formula= UO+
      charge=  1.0      ion size=  4.1 A      mole wt.=  254.0280 g
      3 species in reaction
      1.0000 U+++           1.0000 H2O           -2.0000 H+           
      14.8639    12.7024    10.3663    8.3605
      6.5004    5.0995    3.9803    3.0207
*    References DGf or LogK 97bsho/sas ; DHf n/a
*    S° 97bsho/sas ; Cp 97bsho/sas


UO++
*     formula= UO+2
      charge=  2.0      ion size=  5.7 A      mole wt.=  254.0280 g
      3 species in reaction
      1.0000 U++++           1.0000 H2O           -2.0000 H+           
      3.2145    2.0006    0.7049    -0.3938
      -1.4075    -2.1802    -2.8210    -3.3989
*    References DGf or LogK 97bsho/sas ; DHf n/a
*    S° 97bsho/sas ; Cp 97bsho/sas


UO2(aq)
*     formula= UO2(aq)
      charge=  0.0      ion size=  3.4 A      mole wt.=  270.0280 g
      3 species in reaction
      1.0000 U++++           2.0000 H2O           -4.0000 H+           
      5.7886    4.5509    3.1761    1.9595
      0.7683    -0.2188    -1.1243    -2.0388
*    References DGf or LogK 97bsho/sas ; DHf n/a
*    S° 97bsho/sas ; Cp 97bsho/sas


UO2OH+
*     formula= UO2OH+
      charge=  1.0      ion size=  4.1 A      mole wt.=  287.0350 g
      3 species in reaction
      1.0000 UO2++           1.0000 H2O           -1.0000 H+           
      5.9281    5.2111    4.4418    3.7873
      3.1847    2.7312    2.3636    2.0375
*    References DGf or LogK 97bsho/sas ; DHf n/a
*    S° 97bsho/sas ; Cp 97bsho/sas


UO2OH(aq)
*     formula= UO2OH(aq)
      charge=  0.0      ion size=  3.4 A      mole wt.=  287.0350 g
      3 species in reaction
      1.0000 UO2+           1.0000 H2O           -1.0000 H+           
      19.2956    18.1559    16.7824    15.4764
      14.1353    13.0227    12.0652    11.2052
*    References DGf or LogK 97bsho/sas ; DHf n/a
*    S° 97bsho/sas ; Cp 97bsho/sas


UO3(aq)
*     formula= UO3(AQ)
      charge=  0.0      ion size=  3.4 A      mole wt.=  286.0270 g
      3 species in reaction
      1.0000 UO2++           1.0000 H2O           -2.0000 H+           
      11.1544    10.3055    9.3973    8.6240
      7.9056    7.3516    6.8819    6.4324
*    References DGf or LogK 97bsho/sas ; DHf n/a
*    S° 97bsho/sas ; Cp 97bsho/sas


UO3-
*     formula= UO3-
      charge=  -1.0      ion size=  3.6 A      mole wt.=  286.0270 g
      3 species in reaction
      1.0000 UO2+           1.0000 H2O           -2.0000 H+           
      39.2008    36.4809    33.3316    30.4502
      27.6326    25.4548    23.7705    22.5237
*    References DGf or LogK 97bsho/sas ; DHf n/a
*    S° 97bsho/sas ; Cp 97bsho/sas


UO4--
*     formula= UO4-2
      charge=  -2.0      ion size=  4.7 A      mole wt.=  302.0270 g
      3 species in reaction
      1.0000 UO2++           2.0000 H2O           -4.0000 H+           
      35.3753    33.0133    30.5030    28.4205
      26.6284    25.4805    24.8403    24.7069
*    References DGf or LogK 97bsho/sas ; DHf n/a
*    S° 97bsho/sas ; Cp 97bsho/sas


UOH++
*     formula= U(OH)+2
      charge=  2.0      ion size=  5.7 A      mole wt.=  255.0360 g
      3 species in reaction
      1.0000 U+++           1.0000 H2O           -1.0000 H+           
      7.3753    6.1787    4.8536    3.6898
      2.5842    1.7300    1.0327    0.4301
*    References DGf or LogK 97bsho/sas ; DHf n/a
*    S° 97bsho/sas ; Cp 97bsho/sas


VO+
*     formula= VO(+1)
      charge=  1.0      ion size=  4.1 A      mole wt.=  66.9410 g
      3 species in reaction
      1.0000 V+++           1.0000 H2O           -2.0000 H+           
      7.7232    6.2153    4.6625    3.4017
      2.3038    1.5270    0.9289    0.4129
*    References DGf or LogK 97asho/sas ; DHf n/a
*    S° 97asho/sas ; Cp 97asho/sas


VO4---
*     formula= VO4-3
      charge=  -3.0      ion size=  6.7 A      mole wt.=  114.9390 g
      3 species in reaction
      1.0000 VO2+           2.0000 H2O           -4.0000 H+           
      29.8131    28.4101    26.7548    25.2538
      23.8621    22.9334    22.4616    22.5789
*    References DGf or LogK 97asho/sas ; DHf n/a
*    S° 97asho/sas ; Cp 97asho/sas


VOH+
*     formula= VOH(+1)
      charge=  1.0      ion size=  4.1 A      mole wt.=  67.9490 g
      3 species in reaction
      1.0000 V++           1.0000 H2O           -1.0000 H+           
      7.0405    6.5085    5.8518    5.2171
      4.5529    3.9872    3.4819    3.0049
*    References DGf or LogK 97asho/sas ; DHf n/a
*    S° 97asho/sas ; Cp 97asho/sas


VOH++
*     formula= VOH(+2)
      charge=  2.0      ion size=  5.7 A      mole wt.=  67.9490 g
      3 species in reaction
      1.0000 V+++           1.0000 H2O           -1.0000 H+           
      3.0510    2.2571    1.4276    0.7462
      0.1454    -0.2861    -0.6231    -0.9134
*    References DGf or LogK 97asho/sas ; DHf n/a
*    S° 97asho/sas ; Cp 97asho/sas


VOOH+
*     formula= VOOH(+1)
      charge=  1.0      ion size=  4.1 A      mole wt.=  83.9480 g
      3 species in reaction
      1.0000 VO++           1.0000 H2O           -1.0000 H+           
      6.1145    5.6289    5.1192    4.7023
      4.3388    4.0816    3.8814    3.7012
*    References DGf or LogK 97asho/sas ; DHf n/a
*    S° 97asho/sas ; Cp 97asho/sas


YbCl++
*     formula= YbCl+2
      charge=  2.0      ion size=  5.7 A      mole wt.=  208.4920 g
      2 species in reaction
      1.0000 Cl-           1.0000 Yb+++           
      -0.1699    -0.3325    -0.6597    -1.0995
      -1.7104    -2.3848    -3.1478    -4.0710
*    References DGf or LogK 95haa/sho ; DHf n/a
*    S° 95haa/sho ; Cp 95haa/sho


YbCl2+
*     formula= YbCl2+
      charge=  1.0      ion size=  4.1 A      mole wt.=  243.9450 g
      2 species in reaction
      2.0000 Cl-           1.0000 Yb+++           
      0.2791    0.0794    -0.3456    -0.9385
      -1.7958    -2.7861    -3.9641    -5.4757
*    References DGf or LogK 95haa/sho ; DHf n/a
*    S° 95haa/sho ; Cp 95haa/sho


YbCl3(aq)
*     formula= YbCl3(aq)
      charge=  0.0      ion size=  3.4 A      mole wt.=  279.3970 g
      2 species in reaction
      3.0000 Cl-           1.0000 Yb+++           
      0.6251    0.5646    0.3095    -0.1400
      -0.9027    -1.9025    -3.2212    -5.0763
*    References DGf or LogK 95haa/sho ; DHf n/a
*    S° 95haa/sho ; Cp 95haa/sho


YbCl4-
*     formula= YbCl4-
      charge=  -1.0      ion size=  3.6 A      mole wt.=  314.8500 g
      2 species in reaction
      4.0000 Cl-           1.0000 Yb+++           
      0.6972    0.9765    1.2431    1.3953
      1.3645    1.0679    0.4276    -0.7689
*    References DGf or LogK 95haa/sho ; DHf n/a
*    S° 95haa/sho ; Cp 95haa/sho


YbCO3+
*     formula= YbCO3+
      charge=  1.0      ion size=  4.1 A      mole wt.=  233.0490 g
      3 species in reaction
      1.0000 HCO3-           1.0000 Yb+++           -1.0000 H+           
      1.7305    1.8646    2.0603    2.2699
      2.4811    2.6064    2.6010    2.3671
*    References DGf or LogK 95haa/sho ; DHf n/a
*    S° 95haa/sho ; Cp 95haa/sho


YbF++
*     formula= YbF+2
      charge=  2.0      ion size=  5.7 A      mole wt.=  192.0380 g
      2 species in reaction
      1.0000 F-           1.0000 Yb+++           
      -4.6973    -5.0063    -5.5050    -6.1014
      -6.8690    -7.6754    -8.5600    -9.6016
*    References DGf or LogK 95haa/sho ; DHf n/a
*    S° 95haa/sho ; Cp 95haa/sho


YbF2+
*     formula= YbF2+
      charge=  1.0      ion size=  4.1 A      mole wt.=  211.0370 g
      2 species in reaction
      2.0000 F-           1.0000 Yb+++           
      -8.5037    -8.6085    -8.9357    -9.4410
      -10.2148    -11.1491    -12.3011    -13.8176
*    References DGf or LogK 95haa/sho ; DHf n/a
*    S° 95haa/sho ; Cp 95haa/sho


YbF3(aq)
*     formula= YbF3(aq)
      charge=  0.0      ion size=  3.4 A      mole wt.=  230.0350 g
      2 species in reaction
      3.0000 F-           1.0000 Yb+++           
      -11.6267    -11.3311    -11.1793    -11.2406
      -11.6019    -12.2785    -13.3468    -15.0201
*    References DGf or LogK 95haa/sho ; DHf n/a
*    S° 95haa/sho ; Cp 95haa/sho


YbF4-
*     formula= YbF4-
      charge=  -1.0      ion size=  3.6 A      mole wt.=  249.0340 g
      2 species in reaction
      4.0000 F-           1.0000 Yb+++           
      -14.5493    -13.5406    -12.4749    -11.6064
      -10.9410    -10.7035    -10.9430    -11.8703
*    References DGf or LogK 95haa/sho ; DHf n/a
*    S° 95haa/sho ; Cp 95haa/sho


YbH2PO4++
*     formula= YbH2PO4+2
      charge=  2.0      ion size=  5.7 A      mole wt.=  270.0270 g
      2 species in reaction
      1.0000 H2PO4-           1.0000 Yb+++           
      -1.4998    -1.2678    -1.1868    -1.2826
      -1.5754    -2.0092    -2.5798    -3.3400
*    References DGf or LogK 95haa/sho ; DHf n/a
*    S° 95haa/sho ; Cp 95haa/sho


YbHCO3++
*     formula= YbHCO3+2
      charge=  2.0      ion size=  5.7 A      mole wt.=  234.0570 g
      2 species in reaction
      1.0000 HCO3-           1.0000 Yb+++           
      -2.0092    -2.0144    -2.2024    -2.5424
      -3.0769    -3.7056    -4.4402    -5.3407
*    References DGf or LogK 95haa/sho ; DHf n/a
*    S° 95haa/sho ; Cp 95haa/sho


YbNO3++
*     formula= YbNO3+2
      charge=  2.0      ion size=  5.7 A      mole wt.=  235.0450 g
      2 species in reaction
      1.0000 NO3-           1.0000 Yb+++           
      -0.9695    -0.3728    0.1454    0.4688
      0.6145    0.5541    0.3146    -0.1404
*    References DGf or LogK 95haa/sho ; DHf n/a
*    S° 95haa/sho ; Cp 95haa/sho


YbO+
*     formula= YbO+
      charge=  1.0      ion size=  4.1 A      mole wt.=  189.0390 g
      3 species in reaction
      1.0000 Yb+++           1.0000 H2O           -2.0000 H+           
      17.9193    15.5863    13.0149    10.7604
      8.6214    6.9740    5.6374    4.4904
*    References DGf or LogK 95haa/sho ; DHf n/a
*    S° 95haa/sho ; Cp 95haa/sho


YbO2-
*     formula= YbO2-
      charge=  -1.0      ion size=  3.6 A      mole wt.=  205.0390 g
      3 species in reaction
      1.0000 Yb+++           2.0000 H2O           -4.0000 H+           
      36.5609    32.5034    28.0486    24.1748
      20.5635    17.8756    15.8242    14.2601
*    References DGf or LogK 95haa/sho ; DHf n/a
*    S° 95haa/sho ; Cp 95haa/sho


YbO2H(aq)
*     formula= YbO2H(aq)
      charge=  0.0      ion size=  3.4 A      mole wt.=  206.0470 g
      3 species in reaction
      1.0000 Yb+++           2.0000 H2O           -3.0000 H+           
      27.1965    23.7074    19.9566    16.7651
      13.8492    11.7038    10.0426    8.6710
*    References DGf or LogK 95haa/sho ; DHf n/a
*    S° 95haa/sho ; Cp 95haa/sho


YbOH++
*     formula= YbOH+2
      charge=  2.0      ion size=  5.7 A      mole wt.=  190.0470 g
      3 species in reaction
      1.0000 Yb+++           1.0000 H2O           -1.0000 H+           
      8.6910    7.4500    6.0366    4.7589
      3.5078    2.5121    1.6812    0.9565
*    References DGf or LogK 95haa/sho ; DHf n/a
*    S° 95haa/sho ; Cp 95haa/sho


YbSO4+
*     formula= YbSO4+
      charge=  1.0      ion size=  4.1 A      mole wt.=  269.1040 g
      2 species in reaction
      1.0000 SO4--           1.0000 Yb+++           
      -3.5317    -3.8074    -4.2120    -4.6757
      -5.2836    -5.9745    -6.8326    -8.0219
*    References DGf or LogK 95haa/sho ; DHf n/a
*    S° 95haa/sho ; Cp 95haa/sho


YO+
*     formula= YO(+1)
      charge=  1.0      ion size=  4.1 A      mole wt.=  104.9050 g
      3 species in reaction
      1.0000 Y+++           1.0000 H2O           -2.0000 H+           
      18.7900    16.4040    13.8143    11.5810
      9.5019    7.9338    6.6864    5.6332
*    References DGf or LogK 97asho/sas ; DHf n/a
*    S° 97asho/sas ; Cp 97asho/sas


YO2-
*     formula= YO2(-1)
      charge=  -1.0      ion size=  3.6 A      mole wt.=  120.9050 g
      3 species in reaction
      1.0000 Y+++           2.0000 H2O           -4.0000 H+           
      40.8546    36.4731    31.6762    27.5171
      23.6526    20.7883    18.6129    16.9635
*    References DGf or LogK 97asho/sas ; DHf n/a
*    S° 97asho/sas ; Cp 97asho/sas


YOH++
*     formula= YOH(+2)
      charge=  2.0      ion size=  5.7 A      mole wt.=  105.9130 g
      3 species in reaction
      1.0000 Y+++           1.0000 H2O           -1.0000 H+           
      8.9279    7.6813    6.3046    5.0991
      3.9586    3.0829    2.3745    1.7711
*    References DGf or LogK 97asho/sas ; DHf n/a
*    S° 97asho/sas ; Cp 97asho/sas


Zn(HS)2(aq)
*     formula= Zn(HS)2(0)
      charge=  0.0      ion size=  3.4 A      mole wt.=  131.5380 g
      2 species in reaction
      2.0000 HS-           1.0000 Zn++           
      -10.1826    -9.6883    -9.3523    -9.3278
      -9.6850    -10.3804    -11.4004    -12.8483
*    References DGf or LogK 14aki/tag ; DHf 14aki/tag
*    S° n/a ; Cp 14aki/tag


Zn(HS)2OH-
*     formula= Zn(HS)2OH(-1)
      charge=  -1.0      ion size=  3.6 A      mole wt.=  148.5450 g
      4 species in reaction
      2.0000 HS-           1.0000 Zn++           1.0000 H2O
      -1.0000 H+           
      -3.6234    -3.4496    -3.1349    -2.8745
      -2.7581    -2.8713    -3.2214    -3.8708
*    References DGf or LogK 14aki/tag ; DHf 14aki/tag
*    S° n/a ; Cp 14aki/tag


Zn(HS)3-
*     formula= Zn(HS)3(-1)
      charge=  -1.0      ion size=  3.6 A      mole wt.=  164.6120 g
      2 species in reaction
      3.0000 HS-           1.0000 Zn++           
      -14.1671    -13.2611    -12.5401    -12.1788
      -12.1833    -12.5728    -13.3284    -14.5630
*    References DGf or LogK 14aki/tag ; DHf 14aki/tag
*    S° n/a ; Cp 14aki/tag


Zn(HS)4--
*     formula= Zn(HS)4(-2)
      charge=  -2.0      ion size=  4.7 A      mole wt.=  197.6860 g
      2 species in reaction
      4.0000 HS-           1.0000 Zn++           
      -15.4764    -14.4215    -13.6052    -13.2200
      -13.2625    -13.7318    -14.5892    -15.9347
*    References DGf or LogK 14aki/tag ; DHf 14aki/tag
*    S° n/a ; Cp 14aki/tag


Zn2OH+++
*     formula= Zn2OH(+3)
      charge=  3.0      ion size=  8.2 A      mole wt.=  147.7870 g
      3 species in reaction
      2.0000 Zn++           1.0000 H2O           -1.0000 H+           
      7.9000    7.9000    7.9000    7.9000
      7.9000    7.9000    7.9000    7.9000
*    References DGf or LogK 13pow/bro ; DHf n/a
*    S° n/a ; Cp n/a


ZnAsO4-
*     formula= ZnAsO4-
      charge=  -1.0      ion size=  3.6 A      mole wt.=  204.3090 g
      3 species in reaction
      1.0000 H2AsO4-           1.0000 Zn++           -2.0000 H+           
      12.4748    11.0514    9.5917    8.4333
      7.4718    6.8452    6.4121    6.0746
*    References DGf or LogK 07mar/acc ; DHf n/a
*    S° 07mar/acc ; Cp 07mar/acc


ZnBr+
*     formula= ZnBr(+1)
      charge=  1.0      ion size=  4.1 A      mole wt.=  145.2940 g
      2 species in reaction
      1.0000 Br-           1.0000 Zn++           
      0.7295    0.6000    0.2388    -0.3853
      -1.4185    -2.7087    -4.3179    -6.5056
*    References DGf or LogK 12liu/bor ; DHf 18las/bla
*    S° n/a ; Cp 18las/bla


ZnBr2(aq)
*     formula= ZnBr2(0)
      charge=  0.0      ion size=  3.4 A      mole wt.=  225.1980 g
      2 species in reaction
      2.0000 Br-           1.0000 Zn++           
      1.5405    1.0000    -0.0959    -1.7279
      -4.2037    -7.1053    -10.5236    -14.8656
*    References DGf or LogK 12liu/bor ; DHf 18las/bla
*    S° n/a ; Cp 18las/bla


ZnBr3-
*     formula= ZnBr3(-1)
      charge=  -1.0      ion size=  3.6 A      mole wt.=  305.1020 g
      2 species in reaction
      3.0000 Br-           1.0000 Zn++           
      2.3808    1.8000    0.7325    -0.7476
      -2.8728    -5.2394    -7.8686    -10.9193
*    References DGf or LogK 12liu/bor ; DHf 18las/bla
*    S° n/a ; Cp 18las/bla


ZnBr4--
*     formula= ZnBr4(-2)
      charge=  -2.0      ion size=  4.7 A      mole wt.=  385.0060 g
      2 species in reaction
      4.0000 Br-           1.0000 Zn++           
      1.2739    1.3000    0.5798    -1.0725
      -4.0831    -8.0818    -13.4790    -21.9373
*    References DGf or LogK 12liu/bor ; DHf 18las/bla
*    S° n/a ; Cp 18las/bla


ZnCl+
*     formula= ZnCl(+)
      charge=  1.0      ion size=  4.1 A      mole wt.=  100.8420 g
      2 species in reaction
      1.0000 Cl-           1.0000 Zn++           
      -0.2069    -0.3939    -0.7347    -1.1895
      -1.8279    -2.5396    -3.3478    -4.3232
*    References DGf or LogK n/a ; DHf 14aki/tag
*    S° 14aki/tag ; Cp 14aki/tag


ZnCl2(aq)
*     formula= ZnCl2(0)
      charge=  0.0      ion size=  3.4 A      mole wt.=  136.2950 g
      2 species in reaction
      2.0000 Cl-           1.0000 Zn++           
      -0.1223    -0.4705    -1.1006    -1.9073
      -2.9977    -4.1869    -5.5345    -7.1926
*    References DGf or LogK n/a ; DHf 14aki/tag
*    S° 14aki/tag ; Cp 14aki/tag


ZnCl3-
*     formula= ZnCl3(-)
      charge=  -1.0      ion size=  3.6 A      mole wt.=  171.7470 g
      2 species in reaction
      3.0000 Cl-           1.0000 Zn++           
      -0.2707    -0.5373    -1.1583    -2.0647
      -3.3893    -4.8926    -6.6103    -8.6885
*    References DGf or LogK n/a ; DHf 14aki/tag
*    S° 14aki/tag ; Cp 14aki/tag


ZnCl4--
*     formula= ZnCl4(-2)
      charge=  -2.0      ion size=  4.7 A      mole wt.=  207.2000 g
      2 species in reaction
      4.0000 Cl-           1.0000 Zn++           
      0.6778    0.3836    -0.3418    -1.4098
      -2.9618    -4.7000    -6.6481    -8.9427
*    References DGf or LogK n/a ; DHf 14aki/tag
*    S° 14aki/tag ; Cp 14aki/tag


ZnCO3(aq)
*     formula= ZnCO3(0)
      charge=  0.0      ion size=  3.4 A      mole wt.=  125.3990 g
      3 species in reaction
      1.0000 HCO3-           1.0000 Zn++           -1.0000 H+           
      5.5768    5.5768    5.5768    5.5768
      5.5768    5.5768    5.5768    5.5768
*    References DGf or LogK 13pow/bro ; DHf n/a
*    S° n/a ; Cp n/a


ZnF+
*     formula= ZnF(1)
      charge=  1.0      ion size=  4.1 A      mole wt.=  84.3880 g
      2 species in reaction
      1.0000 F-           1.0000 Zn++           
      -1.2094    -1.1987    -1.3138    -1.5382
      -1.9085    -2.3671    -2.9359    -3.6881
*    References DGf or LogK 97sve/sho ; DHf n/a
*    S° 97sve/sho ; Cp 97sve/sho


ZnH2AsO4+
*     formula= ZnH2AsO4+
      charge=  1.0      ion size=  4.1 A      mole wt.=  206.3250 g
      2 species in reaction
      1.0000 H2AsO4-           1.0000 Zn++           
      -0.6726    -0.5344    -0.4814    -0.5230
      -0.6740    -0.9197    -1.2766    -1.8078
*    References DGf or LogK 07mar/acc ; DHf n/a
*    S° 07mar/acc ; Cp 07mar/acc


ZnH2PO4+
*     formula= ZnH2PO4+
      charge=  1.0      ion size=  4.1 A      mole wt.=  162.3770 g
      2 species in reaction
      1.0000 H2PO4-           1.0000 Zn++           
      -1.5935    -1.5935    -1.5935    -1.5935
      -1.5935    -1.5935    -1.5935    -1.5935
*    References DGf or LogK 73bnri ; DHf n/a
*    S° n/a ; Cp n/a


ZnHAsO4
*     formula= ZnHAsO4
      charge=  0.0      ion size=  3.4 A      mole wt.=  205.3170 g
      3 species in reaction
      1.0000 H2AsO4-           1.0000 Zn++           -1.0000 H+           
      3.2420    3.9369    2.8114    0.0711
      -4.3543    -9.1969    -14.0015    -18.2771
*    References DGf or LogK 07mar/acc ; DHf n/a
*    S° 07mar/acc ; Cp 07mar/acc


ZnHCO3+
*     formula= ZnHCO3(+1)
      charge=  1.0      ion size=  4.1 A      mole wt.=  126.4070 g
      2 species in reaction
      1.0000 HCO3-           1.0000 Zn++           
      -1.6039    -1.6200    -1.7683    -2.1187
      -2.8340    -3.9687    -5.8837    -9.7250
*    References DGf or LogK 13pow/bro ; DHf 13pow/bro
*    S° n/a ; Cp 18las/bla


ZnHPO4(aq)
*     formula= ZnHPO4(0)
      charge=  0.0      ion size=  3.4 A      mole wt.=  161.3690 g
      3 species in reaction
      1.0000 H2PO4-           1.0000 Zn++           -1.0000 H+           
      3.9120    3.9120    3.9120    3.9120
      3.9120    3.9120    3.9120    3.9120
*    References DGf or LogK 73bnri ; DHf n/a
*    S° n/a ; Cp n/a


ZnO(aq)
*     formula= ZnO(0)
      charge=  0.0      ion size=  3.4 A      mole wt.=  81.3890 g
      3 species in reaction
      1.0000 Zn++           1.0000 H2O           -2.0000 H+           
      21.4080    19.1732    16.7076    14.5830
      12.6341    11.2042    10.1055    9.2065
*    References DGf or LogK n/a ; DHf 14aki/tag
*    S° 14aki/tag ; Cp 14aki/tag


ZnO2--
*     formula= ZnO2(-2)
      charge=  -2.0      ion size=  4.7 A      mole wt.=  97.3890 g
      3 species in reaction
      1.0000 Zn++           2.0000 H2O           -4.0000 H+           
      43.3175    40.5177    37.4036    34.6885
      32.1962    30.4356    29.2540    28.6350
*    References DGf or LogK n/a ; DHf 14aki/tag
*    S° 14aki/tag ; Cp 14aki/tag


ZnOH+
*     formula= ZnOH(+1)
      charge=  1.0      ion size=  4.1 A      mole wt.=  82.3970 g
      3 species in reaction
      1.0000 Zn++           1.0000 H2O           -1.0000 H+           
      9.4188    8.6741    7.7981    6.9587
      6.0718    5.3050    4.6139    3.9638
*    References DGf or LogK n/a ; DHf 14aki/tag
*    S° 14aki/tag ; Cp 14aki/tag


ZnPO4-
*     formula= ZnPO4-
      charge=  -1.0      ion size=  3.6 A      mole wt.=  160.3610 g
      3 species in reaction
      1.0000 H2PO4-           1.0000 Zn++           -2.0000 H+           
      11.5138    11.5138    11.5138    11.5138
      11.5138    11.5138    11.5138    11.5138
*    References DGf or LogK 79mat/spo ; DHf n/a
*    S° n/a ; Cp n/a


ZnSO4(aq)
*     formula= ZnSO4(0)
      charge=  0.0      ion size=  3.4 A      mole wt.=  161.4540 g
      2 species in reaction
      1.0000 SO4--           1.0000 Zn++           
      -2.3026    -2.4600    -2.7922    -3.2332
      -3.8545    -4.5805    -5.4834    -6.7230
*    References DGf or LogK 18las/bla ; DHf 18las/bla
*    S° n/a ; Cp n/a


Zr++++
*     formula= Zr+4
      charge=  4.0      ion size=  11.0 A      mole wt.=  91.2240 g
      3 species in reaction
      1.0000 ZrO++           2.0000 H+           -1.0000 H2O           
      -2.6986    -1.7220    -0.6386    0.3191
      1.2464    1.9922    2.6408    3.2480
*    References DGf or LogK 97asho/sas ; DHf n/a
*    S° 97asho/sas ; Cp 97asho/sas


ZrO2(aq)
*     formula= ZrO2(0)
      charge=  0.0      ion size=  3.4 A      mole wt.=  123.2230 g
      3 species in reaction
      1.0000 ZrO++           1.0000 H2O           -2.0000 H+           
      8.5278    7.9745    7.2569    6.5267
      5.7120    4.9618    4.2330    3.4888
*    References DGf or LogK 97asho/sas ; DHf n/a
*    S° 97asho/sas ; Cp 97asho/sas


ZrOH+++
*     formula= Zr(OH)+3
      charge=  3.0      ion size=  8.2 A      mole wt.=  108.2310 g
      2 species in reaction
      1.0000 ZrO++           1.0000 H+           
      -2.6489    -2.0524    -1.4709    -1.0268
      -0.6694    -0.4403    -0.2794    -0.1453
*    References DGf or LogK 97asho/sas ; DHf n/a
*    S° 97asho/sas ; Cp 97asho/sas


-end-

 737 minerals

2K2SO4.Fe2(SO4)3:14H2O          type=
      formula= K4Fe2(SO4)5:14H2O
      mole vol.=  1.000 cc      mole wt.=  1000.6190 g
      4 species in reaction
      2.0000 Fe+++           4.0000 K+           5.0000 SO4--
      14.0000 H2O           
      -13.0320    -13.0320    -13.0320    -13.0320
      -13.0320    -13.0320    -13.0320    -13.0320
*    References DGf or LogK 04chr ; DHf n/a
*    S° n/a ; Cp n/a


2KCl.FeCl3:H2O                  type=
      formula= K2FeCl5:H2O
      mole vol.=  1.000 cc      mole wt.=  329.3210 g
      4 species in reaction
      5.0000 Cl-           1.0000 Fe+++           2.0000 K+
      1.0000 H2O           
      5.6310    5.6310    5.6310    5.6310
      5.6310    5.6310    5.6310    5.6310
*    References DGf or LogK 04chr ; DHf n/a
*    S° n/a ; Cp n/a


Acanthite(alpha)                type=
      formula= Ag2S
      mole vol.=  34.200 cc      mole wt.=  247.8020 g
      3 species in reaction
      -1.0000 H+           2.0000 Ag+           1.0000 HS-           
      -39.7347    -36.0698    -31.9174    -28.1580
      -24.4990    -21.6775    -19.5023    -17.9075
*    References DGf or LogK n/a ; DHf 78hel/del
*    S° 78hel/del ; Cp 78hel/del


Adamite                         type=
      formula= Zn2AsO4(OH)
      mole vol.=  64.574 cc      mole wt.=  286.7070 g
      4 species in reaction
      -3.0000 H+           1.0000 H2AsO4-           2.0000 Zn++
      1.0000 H2O           
      5.7110    5.7110    5.7110    5.7110
      5.7110    5.7110    5.7110    5.7110
*    References DGf or LogK 01gas/aza ; DHf n/a
*    S° n/a ; Cp n/a


Aegerine(alpha)                 type=
      formula= NaFe(SiO3)2
      mole vol.=  64.370 cc      mole wt.=  231.0040 g
      5 species in reaction
      -4.0000 H+           -2.0000 H2O           1.0000 Fe+++
      1.0000 Na+           2.0000 H4SiO4(aq)           
      1.6631    0.9205    -0.0572    -0.9731
      -1.8734    -2.6094    -3.2856    -3.9999
*    References DGf or LogK n/a ; DHf 95rob/hem
*    S° 95rob/hem ; Cp 95rob/hem


Afwillite                       type=
      formula= Ca3Si2O4(OH)6
      mole vol.=  129.530 cc      mole wt.=  342.4470 g
      4 species in reaction
      -6.0000 H+           3.0000 Ca++           2.0000 H4SiO4(aq)
      2.0000 H2O           
      53.6160    49.4220    44.5466    40.1402
      35.8817    32.5586    29.8247    27.4044
*    References DGf or LogK 10abla/bou ; DHf 10abla/bou
*    S° n/a ; Cp 10abla/bou


Ag(element)                     type=
      formula= Ag
      mole vol.=  10.272 cc      mole wt.=  107.8680 g
      4 species in reaction
      -0.5000 O2(aq)           -2.0000 H+           1.0000 Ag++
      1.0000 H2O           
      -3.9869    -4.1364    -4.3546    -4.5925
      -4.8764    -5.1621    -5.4723    -5.8410
*    References DGf or LogK By convention ; DHf n/a
*    S° 89cox/wag ; Cp 89cox/wag


Ag2O                            type=
      formula= Ag2O
      mole vol.=  30.000 cc      mole wt.=  231.7350 g
      3 species in reaction
      -2.0000 H+           2.0000 Ag+           1.0000 H2O           
      13.2760    12.5704    11.8021    11.1698
      10.6352    10.2876    10.0569    9.8897
*    References DGf or LogK 74nau/ryz ; DHf n/a
*    S° 74nau/ryz ; Cp 74nau/ryz


Akermanite                      type=
      formula= Ca2MgSi2O7
      mole vol.=  92.810 cc      mole wt.=  272.6280 g
      5 species in reaction
      -6.0000 H+           -1.0000 H2O           2.0000 Ca++
      1.0000 Mg++           2.0000 H4SiO4(aq)           
      50.9607    46.0937    40.3771    35.1240
      29.9329    25.7761    22.2789    19.1485
*    References DGf or LogK 78hel/del,92ajoh ; DHf n/a
*    S° 78hel/del,92ajoh ; Cp 78hel/del,92ajoh


Al(element)                     type=
      formula= Al
      mole vol.=  9.999 cc      mole wt.=  26.9820 g
      4 species in reaction
      -0.7500 O2(aq)           -3.0000 H+           1.0000 Al+++
      1.5000 H2O           
      165.2356    149.9237    132.2317    115.9644
      99.8088    86.9014    76.2732    67.2765
*    References DGf or LogK n/a ; DHf By convention
*    S° 89cox/wag ; Cp 98cha


Alabandite                      type=
      formula= MnS
      mole vol.=  21.460 cc      mole wt.=  87.0040 g
      3 species in reaction
      -1.0000 H+           1.0000 Mn++           1.0000 HS-           
      0.3493    -0.0030    -0.4910    -1.0227
      -1.6687    -2.3313    -3.0654    -3.9685
*    References DGf or LogK 78hel/del ; DHf n/a
*    S° 78hel/del ; Cp 78hel/del


Alamosite                       type=
      formula= PbSiO3
      mole vol.=  43.650 cc      mole wt.=  283.2840 g
      4 species in reaction
      -2.0000 H+           -1.0000 H2O           1.0000 Pb++
      1.0000 H4SiO4(aq)           
      6.5658    6.1767    5.6458    5.1295
      4.6051    4.1692    3.7745    3.3696
*    References DGf or LogK n/a ; DHf 98cha
*    S° 98cha ; Cp 98cha


Albite(low)                     type=
      formula= NaAlSi3O8
      mole vol.=  100.070 cc      mole wt.=  262.2230 g
      5 species in reaction
      -4.0000 H+           -4.0000 H2O           1.0000 Al+++
      1.0000 Na+           3.0000 H4SiO4(aq)           
      4.1188    3.0071    1.5071    0.0606
      -1.3993    -2.6052    -3.6872    -4.7622
*    References DGf or LogK n/a ; DHf 95rob/hem
*    S° 95rob/hem ; Cp 95rob/hem


AlF3                            type=
      formula= AlF3
      mole vol.=  27.090 cc      mole wt.=  83.9770 g
      2 species in reaction
      1.0000 Al+++           3.0000 F-           
      -16.8975    -17.3240    -18.1012    -19.1117
      -20.5211    -22.1259    -24.0263    -26.4422
*    References DGf or LogK n/a ; DHf 89cox/wag
*    S° 89cox/wag ; Cp 89cox/wag


Almandine(alpha)                type=
      formula= Fe3Al2Si3O12
      mole vol.=  115.280 cc      mole wt.=  497.7530 g
      4 species in reaction
      -12.0000 H+           2.0000 Al+++           3.0000 Fe++
      3.0000 H4SiO4(aq)           
      49.3851    42.1801    33.6280    25.6793
      17.6867    11.1140    5.3874    0.0673
*    References DGf or LogK n/a ; DHf 95rob/hem
*    S° 78hel/del ; Cp 78hel/del


Alunite(K)                      type=
      formula= KAl3(OH)6(SO4)2
      mole vol.=  293.600 cc      mole wt.=  414.2140 g
      5 species in reaction
      -6.0000 H+           3.0000 Al+++           1.0000 K+
      2.0000 SO4--           6.0000 H2O           
      2.9879    -0.5233    -5.0012    -9.5571
      -14.7100    -19.5951    -24.5521    -30.0204
*    References DGf or LogK 78hel/del ; DHf n/a
*    S° 78hel/del ; Cp 78hel/del


Alunite(Na)                     type=
      formula= NaAl3(SO4)2(OH)6
      mole vol.=  1.000 cc      mole wt.=  398.1060 g
      5 species in reaction
      -6.0000 H+           3.0000 Al+++           1.0000 Na+
      2.0000 SO4--           6.0000 H2O           
      6.2921    2.3403    -2.6226    -7.5956
      -13.1424    -18.3355    -23.5629    -29.3020
*    References DGf or LogK 90sto/cyg ; DHf n/a
*    S° 90sto/cyg ; Cp 90sto/cyg


Amesite                         type=
      formula= Mg4Al2(Al2Si2)O10(OH)8
      mole vol.=  205.200 cc      mole wt.=  557.3700 g
      5 species in reaction
      -20.0000 H+           4.0000 Al+++           4.0000 Mg++
      2.0000 H4SiO4(aq)           10.0000 H2O           
      81.5415    69.4099    55.3671    42.5415
      29.8120    19.4427    10.4599    2.1585
*    References DGf or LogK n/a ; DHf 05vid/par
*    S° 05vid/par ; Cp 05vid/par


Amesite(Fe)                     type=
      formula= Fe4Al2(Al2Si2)O10(OH)8
      mole vol.=  209.000 cc      mole wt.=  683.5380 g
      5 species in reaction
      -20.0000 H+           4.0000 Al+++           4.0000 Fe++
      2.0000 H4SiO4(aq)           10.0000 H2O           
      67.8864    57.0423    44.4405    32.8795
      21.3355    11.8534    3.5551    -4.2075
*    References DGf or LogK n/a ; DHf 05vid/par
*    S° 05vid/par ; Cp 05vid/par


Amorphous_silica                type=
      formula= SiO2
      mole vol.=  29.000 cc      mole wt.=  60.0840 g
      2 species in reaction
      -2.0000 H2O           1.0000 H4SiO4(aq)           
      -2.9956    -2.6969    -2.4355    -2.2286
      -2.0312    -1.8706    -1.7357    -1.6269
*    References DGf or LogK n/a ; DHf 00gun/arn
*    S° 00gun/arn ; Cp 00gun/arn


Analcime                        type=
      formula= Na0.99Al0.99Si2.01O6:H2O
      mole vol.=  96.680 cc      mole wt.=  219.9350 g
      5 species in reaction
      -3.9600 H+           -1.0400 H2O           0.9900 Al+++
      0.9900 Na+           2.0100 H4SiO4(aq)           
      8.1458    6.6539    4.8028    3.0788
      1.3716    -0.0138    -1.2276    -2.3924
*    References DGf or LogK n/a ; DHf 04neu/hov
*    S° 82joh/flo, 04neu/hov ; Cp 82joh/flo


Andalusite                      type=
      formula= Al2SiO5
      mole vol.=  51.530 cc      mole wt.=  162.0460 g
      4 species in reaction
      -6.0000 H+           2.0000 Al+++           1.0000 H4SiO4(aq)
      1.0000 H2O           
      20.0640    16.2065    11.6489    7.3982
      3.0862    -0.5002    -3.6539    -6.5836
*    References DGf or LogK 78hel/del ; DHf n/a
*    S° 78hel/del ; Cp 78hel/del


Andradite                       type=
      formula= Ca3Fe2Si3O12
      mole vol.=  131.850 cc      mole wt.=  508.1770 g
      4 species in reaction
      -12.0000 H+           3.0000 Ca++           2.0000 Fe+++
      3.0000 H4SiO4(aq)           
      38.9257    33.7872    27.6765    22.0144
      16.3354    11.6511    7.5141    3.5536
*    References DGf or LogK 78hel/del,92ajoh ; DHf n/a
*    S° 78hel/del,92ajoh ; Cp 78hel/del,92ajoh


Anglesite                       type=
      formula= PbSO4
      mole vol.=  47.950 cc      mole wt.=  303.2640 g
      2 species in reaction
      1.0000 Pb++           1.0000 SO4--           
      -8.1282    -7.8476    -7.7510    -7.8827
      -8.2908    -8.9246    -9.8075    -11.0704
*    References DGf or LogK n/a ; DHf 89cox/wag
*    S° 89cox/wag ; Cp 78hel/del


Anhydrite                       type=
      formula= CaSO4
      mole vol.=  46.010 cc      mole wt.=  136.1420 g
      2 species in reaction
      1.0000 Ca++           1.0000 SO4--           
      -4.2364    -4.4361    -4.8772    -5.4973
      -6.3925    -7.4217    -8.6372    -10.1878
*    References DGf or LogK n/a ; DHf 95rob/hem
*    S° 95rob/hem ; Cp 95rob/hem


Anilite                         type=
      formula= Cu1.75S
      mole vol.=  25.790 cc      mole wt.=  143.2720 g
      4 species in reaction
      -1.0000 H+           1.5000 Cu+           0.2500 Cu++
      1.0000 HS-           
      -34.0663    -31.2200    -27.9921    -25.0835
      -22.2861    -20.1768    -18.6156    -17.5729
*    References DGf or LogK 00pui ; DHf n/a
*    S° 95rob/hem ; Cp 00pui


Annite                          type=
      formula= KFe3(AlSi3)O10(OH)2
      mole vol.=  154.320 cc      mole wt.=  511.8860 g
      5 species in reaction
      -10.0000 H+           1.0000 Al+++           3.0000 Fe++
      1.0000 K+           3.0000 H4SiO4(aq)           
      37.5544    32.7714    27.0573    21.7646
      16.4827    12.1679    8.4102    4.8799
*    References DGf or LogK n/a ; DHf 92cir/nav
*    S° 95dac/ben ; Cp 95dac/ben


Anorthite                       type=
      formula= Ca(Al2Si2)O8
      mole vol.=  100.790 cc      mole wt.=  278.2070 g
      4 species in reaction
      -8.0000 H+           2.0000 Al+++           1.0000 Ca++
      2.0000 H4SiO4(aq)           
      28.9981    24.2351    18.5667    13.2765
      7.9274    3.4998    -0.3799    -3.9925
*    References DGf or LogK n/a ; DHf 95rob/hem
*    S° 95rob/hem ; Cp 95rob/hem


Antarcticite                    type=
      formula= CaCl2:6H2O
      mole vol.=  128.820 cc      mole wt.=  219.0740 g
      3 species in reaction
      1.0000 Ca++           2.0000 Cl-           6.0000 H2O           
      3.7570    3.9470    4.2677    4.6909
      5.2297    5.6985    6.0012    5.9685
*    References DGf or LogK n/a ; DHf 87gar/par
*    S° 87gar/par ; Cp n/a


Anthophyllite                   type=
      formula= Mg7Si8O22(OH)2
      mole vol.=  265.400 cc      mole wt.=  780.8200 g
      4 species in reaction
      -14.0000 H+           -8.0000 H2O           7.0000 Mg++
      8.0000 H4SiO4(aq)           
      82.8428    73.7830    62.8910    52.8708
      43.0456    35.2321    28.6360    22.6161
*    References DGf or LogK n/a ; DHf 95rob/hem
*    S° 95rob/hem ; Cp 95rob/hem


Antigorite                      type=
      formula= Mg48Si34O85(OH)62
      mole vol.=  1754.800 cc      mole wt.=  4535.9510 g
      4 species in reaction
      -96.0000 H+           48.0000 Mg++           34.0000 H4SiO4(aq)
      11.0000 H2O           
      559.1451    500.0798    431.0134    368.6281
      308.2999    260.8360    221.0276    184.8047
*    References DGf or LogK n/a ; DHf 98hol/pow
*    S° 98hol/pow ; Cp 98hol/pow


Antlerite                       type=
      formula= Cu3SO4(OH)4
      mole vol.=  89.805 cc      mole wt.=  354.7310 g
      4 species in reaction
      -4.0000 H+           3.0000 Cu++           1.0000 SO4--
      4.0000 H2O           
      10.8861    8.9118    6.4633    4.0570
      1.4413    -0.9486    -3.3234    -5.9536
*    References DGf or LogK 00pui ; DHf n/a
*    S° 00pui ; Cp 00pui


Aplowite                        type=
      formula= CoSO4:H2O
      mole vol.=  56.260 cc      mole wt.=  173.0120 g
      3 species in reaction
      1.0000 Co++           1.0000 SO4--           1.0000 H2O           
      -0.2673    -1.0491    -2.0616    -3.0845
      -4.2311    -5.3282    -6.4927    -7.9116
*    References DGf or LogK n/a ; DHf 74nau/ryz
*    S° 74nau/ryz ; Cp n/a


Aragonite                       type=
      formula= CaCO3
      mole vol.=  34.150 cc      mole wt.=  100.0870 g
      3 species in reaction
      -1.0000 H+           1.0000 HCO3-           1.0000 Ca++           
      2.3861    2.0143    1.5103    0.9653
      0.3086    -0.3566    -1.0813    -1.9595
*    References DGf or LogK n/a ; DHf 87gar/par
*    S° 87gar/par ; Cp 87gar/par


Arcanite                        type=
      formula= K2(SO4)
      mole vol.=  65.500 cc      mole wt.=  174.2600 g
      2 species in reaction
      2.0000 K+           1.0000 SO4--           
      -2.3218    -1.8493    -1.5103    -1.3958
      -1.5262    -1.8979    -2.5186    -3.5037
*    References DGf or LogK n/a ; DHf 98cha
*    S° 98cha ; Cp 98cha


Argutite(alpha)                 type=
      formula= GeO2
      mole vol.=  17.420 cc      mole wt.=  104.6090 g
      2 species in reaction
      -2.0000 H2O           1.0000 Ge(OH)4(aq)           
      -5.5814    -5.0236    -4.3790    -3.7757
      -3.1632    -2.6673    -2.2625    -1.9375
*    References DGf or LogK n/a ; DHf 98pok/sch
*    S° 98pok/sch ; Cp 98pok/sch


Argutite(beta)                  type=
      formula= GeO2
      mole vol.=  1.000 cc      mole wt.=  104.6090 g
      2 species in reaction
      -2.0000 H2O           1.0000 Ge(OH)4(aq)           
      -2.1643    -1.9747    -1.7536    -1.5372
      -1.3048    -1.1070    -0.9412    -0.8111
*    References DGf or LogK n/a ; DHf n/a
*    S° n/a ; Cp 98pok/sch


Arsenocrandallite               type=
      formula= CaAl3(AsO4)2(OH)5:H2O
      mole vol.=  1.000 cc      mole wt.=  501.9130 g
      5 species in reaction
      -9.0000 H+           3.0000 Al+++           2.0000 H2AsO4-
      1.0000 Ca++           6.0000 H2O           
      10.1465    10.1465    10.1465    10.1465
      10.1465    10.1465    10.1465    10.1465
*    References DGf or LogK 93sch/got ; DHf n/a
*    S° n/a ; Cp n/a


Arsenoflorencite(Ce)            type=
      formula= CeAl3(AsO4)2(OH)6
      mole vol.=  1.000 cc      mole wt.=  600.9470 g
      5 species in reaction
      -10.0000 H+           3.0000 Al+++           2.0000 H2AsO4-
      1.0000 Ce+++           6.0000 H2O           
      9.3508    9.3508    9.3508    9.3508
      9.3508    9.3508    9.3508    9.3508
*    References DGf or LogK 93sch/got ; DHf n/a
*    S° n/a ; Cp n/a


Arsenoflorencite(La)            type=
      formula= LaAl3(AsO4)2(OH)6
      mole vol.=  1.000 cc      mole wt.=  599.7330 g
      5 species in reaction
      -10.0000 H+           3.0000 Al+++           2.0000 H2AsO4-
      1.0000 La+++           6.0000 H2O           
      9.6279    9.6279    9.6279    9.6279
      9.6279    9.6279    9.6279    9.6279
*    References DGf or LogK 93sch/got ; DHf n/a
*    S° n/a ; Cp n/a


Arsenogorceixite                type=
      formula= BaAl3(AsO4)2(OH)5:H2O
      mole vol.=  1.000 cc      mole wt.=  599.1750 g
      5 species in reaction
      -9.0000 H+           3.0000 Al+++           2.0000 H2AsO4-
      1.0000 Ba++           6.0000 H2O           
      7.1149    7.1149    7.1149    7.1149
      7.1149    7.1149    7.1149    7.1149
*    References DGf or LogK 93sch/got ; DHf n/a
*    S° n/a ; Cp n/a


Arsenogoyazite                  type=
      formula= SrAl3(AsO4)2(OH)5:H2O
      mole vol.=  1.000 cc      mole wt.=  549.4550 g
      5 species in reaction
      -9.0000 H+           3.0000 Al+++           2.0000 H2AsO4-
      1.0000 Sr++           6.0000 H2O           
      9.9328    9.9328    9.9328    9.9328
      9.9328    9.9328    9.9328    9.9328
*    References DGf or LogK 93sch/got ; DHf n/a
*    S° n/a ; Cp n/a


Arsenolite                      type=
      formula= As2O3
      mole vol.=  51.120 cc      mole wt.=  197.8410 g
      3 species in reaction
      -3.0000 H2O           2.0000 H2AsO3-           2.0000 H+           
      -21.3856    -19.8642    -18.0853    -16.4696
      -14.9323    -13.8120    -13.0476    -12.6657
*    References DGf or LogK 96pok/gou ; DHf n/a
*    S° 96pok/gou ; Cp 96pok/gou


Arsenopyrite                    type=
      formula= FeAsS
      mole vol.=  26.270 cc      mole wt.=  162.8350 g
      6 species in reaction
      -1.0000 H+           -1.5000 H2O           1.0000 AsH3(aq)
      1.0000 Fe++           1.0000 HS-           0.7500 O2(aq)           
      -100.5461    -92.1286    -82.4328    -73.5592
      -64.8359    -58.0092    -52.5936    -48.3120
*    References DGf or LogK 08per/pok ; DHf n/a
*    S° 08per/pok ; Cp 08per/pok


Artinite                        type=
      formula= Mg2(OH)2(CO3):3H2O
      mole vol.=  96.900 cc      mole wt.=  196.6790 g
      4 species in reaction
      -3.0000 H+           1.0000 HCO3-           2.0000 Mg++
      5.0000 H2O           
      22.2643    20.1424    17.7143    15.5175
      13.3433    11.5508    9.9361    8.3015
*    References DGf or LogK n/a ; DHf 73hem/rob
*    S° 72hem/rob ; Cp 78hel/del


As(element)                     type=
      formula= As
      mole vol.=  12.960 cc      mole wt.=  74.9220 g
      3 species in reaction
      -1.5000 H2O           1.0000 AsH3(aq)           0.7500 O2(aq)           
      -89.7085    -81.9389    -72.8979    -64.5313
      -56.1783    -49.4843    -43.9723    -39.3091
*    References DGf or LogK By convention ; DHf n/a
*    S° 73hul/des ; Cp 73hul/des


As2O5                           type=
      formula= As2O5
      mole vol.=  53.204 cc      mole wt.=  229.8400 g
      3 species in reaction
      -3.0000 H2O           2.0000 H2AsO4-           2.0000 H+           
      2.7583    2.2382    1.4554    0.5292
      -0.6531    -1.8706    -3.1675    -4.6667
*    References DGf or LogK n/a ; DHf 01gas/aza
*    S° 01gas/aza ; Cp 01gas/aza


Atacamite                       type=
      formula= Cu4Cl2(OH)6
      mole vol.=  113.599 cc      mole wt.=  427.1330 g
      4 species in reaction
      -6.0000 H+           2.0000 Cl-           4.0000 Cu++
      6.0000 H2O           
      17.1637    14.9261    12.2738    9.7766
      7.1604    4.8245    2.5079    -0.0999
*    References DGf or LogK 00pui ; DHf n/a
*    S° 00pui ; Cp 00pui


Au(element)                     type=
      formula= Au
      mole vol.=  10.215 cc      mole wt.=  196.9670 g
      4 species in reaction
      -0.7500 O2(aq)           -3.0000 H+           1.0000 Au+++
      1.5000 H2O           
      -11.3091    -11.4456    -11.6648    -11.9217
      -12.2555    -12.6236    -13.0563    -13.5975
*    References DGf or LogK By convention ; DHf n/a
*    S° 95rob/hem ; Cp 78hel/del


Augelite                        type=
      formula= Al2PO4(OH)3
      mole vol.=  74.200 cc      mole wt.=  199.9560 g
      4 species in reaction
      -5.0000 H+           2.0000 Al+++           1.0000 H2PO4-
      3.0000 H2O           
      10.2769    10.2769    10.2769    10.2769
      10.2769    10.2769    10.2769    10.2769
*    References DGf or LogK 79vie/tar ; DHf n/a
*    S° n/a ; Cp n/a


Austinite                       type=
      formula= CaZnAsO4(OH)
      mole vol.=  60.648 cc      mole wt.=  261.3950 g
      5 species in reaction
      -3.0000 H+           1.0000 H2AsO4-           1.0000 Ca++
      1.0000 Zn++           1.0000 H2O           
      6.8810    6.8810    6.8810    6.8810
      6.8810    6.8810    6.8810    6.8810
*    References DGf or LogK 01gas/aza ; DHf n/a
*    S° n/a ; Cp n/a


Azurite                         type=
      formula= Cu3(OH)2(CO3)2
      mole vol.=  91.010 cc      mole wt.=  344.6700 g
      4 species in reaction
      -4.0000 H+           2.0000 HCO3-           3.0000 Cu++
      2.0000 H2O           
      5.0532    3.7500    2.1688    0.6342
      -1.0500    -2.6509    -4.3459    -6.3758
*    References DGf or LogK 07pow/bro ; DHf n/a
*    S° 00pui ; Cp 00pui


B(OH)3                          type=
      formula= B(OH)3
      mole vol.=  43.087 cc      mole wt.=  61.8330 g
      1 specie in reaction
      1.0000 B(OH)3(aq)           
      -0.5177    -0.1583    0.2653    0.6787
      1.1177    1.4869    1.7966    2.0518
*    References DGf or LogK n/a ; DHf 89cox/wag
*    S° 89cox/wag ; Cp 89cox/wag


B2O3                            type=
      formula= B2O3
      mole vol.=  27.260 cc      mole wt.=  69.6200 g
      2 species in reaction
      -3.0000 H2O           2.0000 B(OH)3(aq)           
      5.7609    5.5649    5.2987    5.0436
      4.7909    4.5895    4.4174    4.2539
*    References DGf or LogK n/a ; DHf 89cox/wag
*    S° 89cox/wag ; Cp 89cox/wag


Ba3(AsO4)2                      type=
      formula= Ba3(AsO4)2
      mole vol.=  1.000 cc      mole wt.=  689.8580 g
      3 species in reaction
      -4.0000 H+           2.0000 H2AsO4-           3.0000 Ba++           
      15.3200    15.3200    15.3200    15.3200
      15.3200    15.3200    15.3200    15.3200
*    References DGf or LogK 01gas/aza ; DHf n/a
*    S° n/a ; Cp n/a


BaHAsO4:H2O                     type=
      formula= BaHAsO4:H2O
      mole vol.=  1.000 cc      mole wt.=  295.2820 g
      4 species in reaction
      -1.0000 H+           1.0000 H2AsO4-           1.0000 Ba++
      1.0000 H2O           
      -6.0390    -6.0390    -6.0390    -6.0390
      -6.0390    -6.0390    -6.0390    -6.0390
*    References DGf or LogK 01gas/aza ; DHf n/a
*    S° n/a ; Cp n/a


BaHPO4                          type=
      formula= BaHPO4
      mole vol.=  1.000 cc      mole wt.=  233.3190 g
      3 species in reaction
      -1.0000 H+           1.0000 Ba++           1.0000 H2PO4-           
      -7.0179    -7.4100    -7.9003    -8.3869
      -8.9306    -9.4557    -10.0255    -10.7429
*    References DGf or LogK 66spi/mik ; DHf 71par/wag
*    S° n/a ; Cp n/a


Barite                          type=
      formula= BaSO4
      mole vol.=  52.100 cc      mole wt.=  233.4040 g
      2 species in reaction
      1.0000 Ba++           1.0000 SO4--           
      -10.5658    -10.0507    -9.6829    -9.5744
      -9.7606    -10.2331    -10.9953    -12.1647
*    References DGf or LogK 78hel/del ; DHf n/a
*    S° 78hel/del ; Cp 78hel/del


Bassanite                       type=
      formula= CaSO4:0.5H2O
      mole vol.=  106.080 cc      mole wt.=  145.1490 g
      3 species in reaction
      1.0000 Ca++           1.0000 SO4--           0.5000 H2O           
      -3.7254    -3.9195    -4.3432    -4.9313
      -5.7690    -6.7239    -7.8490    -9.2928
*    References DGf or LogK 06bla/las ; DHf n/a
*    S° CODATA87 ; Cp 06bla/pia


Beidellite(Ca)                  type=
      formula= Ca0.17Al2.34Si3.66O10(OH)2
      mole vol.=  134.100 cc      mole wt.=  366.7520 g
      5 species in reaction
      -7.3600 H+           -2.6400 H2O           2.3400 Al+++
      0.1700 Ca++           3.6600 H4SiO4(aq)           
      8.8127    5.7885    2.0017    -1.5916
      -5.2367    -8.2653    -10.9589    -13.5432
*    References DGf or LogK n/a ; DHf 15bla/vie
*    S° 15bla/vie ; Cp 15bla/vie


Beidellite(K)                   type=
      formula= K0.34Al2.34Si3.66O10(OH)2
      mole vol.=  133.220 cc      mole wt.=  373.2320 g
      5 species in reaction
      -7.3600 H+           -2.6400 H2O           2.3400 Al+++
      0.3400 K+           3.6600 H4SiO4(aq)           
      7.3470    4.6197    1.1750    -2.1031
      -5.4329    -8.2061    -10.6852    -13.0827
*    References DGf or LogK n/a ; DHf 15bla/vie
*    S° 15bla/vie ; Cp 15bla/vie


Beidellite(Mg)                  type=
      formula= Mg0.17Al2.34Si3.66O10(OH)2
      mole vol.=  130.110 cc      mole wt.=  364.0700 g
      5 species in reaction
      -7.3600 H+           -2.6400 H2O           2.3400 Al+++
      0.1700 Mg++           3.6600 H4SiO4(aq)           
      8.2866    5.2433    1.4360    -2.1729
      -5.8297    -8.8648    -11.5623    -14.1491
*    References DGf or LogK n/a ; DHf 15bla/vie
*    S° 15bla/vie ; Cp 15bla/vie


Beidellite(Na)                  type=
      formula= Na0.34Al2.34Si3.66O10(OH)2
      mole vol.=  132.490 cc      mole wt.=  367.7550 g
      5 species in reaction
      -7.3600 H+           -2.6400 H2O           2.3400 Al+++
      0.3400 Na+           3.6600 H4SiO4(aq)           
      7.9850    5.1175    1.5177    -1.8941
      -5.3463    -8.2085    -10.7542    -13.2037
*    References DGf or LogK n/a ; DHf 15bla/vie
*    S° 15bla/vie ; Cp 15bla/vie


BeidelliteSBId                  type=
      formula= Ca0.185K0.104(Si3.574Al0.426)(Al1.812Mg0.090Fe0.112)O10(OH)2
      mole vol.=  137.980 cc      mole wt.=  374.6940 g
      8 species in reaction
      -7.7040 H+           -2.2960 H2O           2.2380 Al+++
      0.1850 Ca++           0.1120 Fe+++           0.1040 K+
      0.0900 Mg++           3.5740 H4SiO4(aq)           
      10.8989    7.5970    3.4965    -0.3953
      -4.3689    -7.7056    -10.7034    -13.5986
*    References DGf or LogK n/a ; DHf 12gai/bla
*    S° 12gai/bla ; Cp 12gai/bla


Berlinite                       type=
      formula= AlPO4
      mole vol.=  46.580 cc      mole wt.=  121.9530 g
      3 species in reaction
      -2.0000 H+           1.0000 Al+++           1.0000 H2PO4-           
      2.8712    1.2075    -0.8356    -2.8464
      -5.0286    -6.9900    -8.8627    -10.7872
*    References DGf or LogK 82wag/eva ; DHf n/a
*    S° 68wag/eva ; Cp 74nau/ryz, 76wag/eva, 71par/wag


Berndtite                       type=
      formula= SnS2
      mole vol.=  40.960 cc      mole wt.=  182.8420 g
      4 species in reaction
      -0.7500 H2O           1.5000 HS-           1.0000 Sn++
      0.2500 S2O3--           
      -34.9920    -32.1511    -29.0986    -26.5226
      -24.2600    -22.7810    -21.9467    -21.7814
*    References DGf or LogK 85jac/hel ; DHf n/a
*    S° 85jac/hel ; Cp 85jac/hel


BerthierineISGS                 type=
      formula= (Si1.332Al0.668)(Al0.976Fe1.622Mg0.157)O5(OH)4
      mole vol.=  101.160 cc      mole wt.=  324.1940 g
      7 species in reaction
      -8.6720 H+           1.6440 Al+++           1.4400 Fe++
      0.1570 Mg++           1.3320 H4SiO4(aq)           0.1820 Fe+++
      3.6720 H2O           
      33.9777    28.8910    22.9608    17.5332
      12.1583    7.8041    4.0559    0.6060
*    References DGf or LogK n/a ; DHf 14bla/gai
*    S° 14bla/gai ; Cp 14bla/gai


Berthierine(FeII)               type=
      formula= (Fe2Al)(SiAl)O5(OH)4
      mole vol.=  103.860 cc      mole wt.=  341.7690 g
      5 species in reaction
      -10.0000 H+           2.0000 Al+++           2.0000 Fe++
      1.0000 H4SiO4(aq)           5.0000 H2O           
      39.5822    33.7100    26.8859    20.6333
      14.4185    9.3597    4.9877    0.9569
*    References DGf or LogK n/a ; DHf 15bla/vie
*    S° 15bla/vie ; Cp 15bla/vie


Berthierine(FeIII)              type=
      formula= (Fe2.67Al0.33)(Si1.34Al0.66)O5(OH)4
      mole vol.=  103.270 cc      mole wt.=  361.4840 g
      6 species in reaction
      -8.6400 H+           0.9900 Al+++           2.3400 Fe++
      1.3400 H4SiO4(aq)           0.3300 Fe+++           3.6400 H2O           
      33.6394    28.9211    23.4206    18.3941
      13.4280    9.4138    5.9597    2.7661
*    References DGf or LogK n/a ; DHf 15bla/vie
*    S° 15bla/vie ; Cp 15bla/vie


Berthierite                     type=
      formula= FeSb2S4
      mole vol.=  90.600 cc      mole wt.=  427.6310 g
      5 species in reaction
      -6.0000 H2O           1.0000 Fe++           4.0000 HS-
      2.0000 Sb(OH)3(aq)           2.0000 H+           
      -66.0896    -61.0583    -55.5355    -50.8087
      -46.6151    -43.8517    -42.2834    -41.9725
*    References DGf or LogK 92sea/rob ; DHf n/a
*    S° 92sea/rob ; Cp 92sea/rob


Beudantite                      type=
      formula= PbFe3(AsO4)2(OH)5:H2O
      mole vol.=  1.000 cc      mole wt.=  755.6310 g
      5 species in reaction
      -9.0000 H+           2.0000 H2AsO4-           3.0000 Fe+++
      1.0000 Pb++           6.0000 H2O           
      -9.3416    -9.3416    -9.3416    -9.3416
[truncated: 404,510 more chars]
